# Supplementary material for: Access to distal biaxial atropisomers by iridium catalyzed asymmetric C–H alkylation
Source: Royal Society of Chemistry journal article supplement (doi:10.1039/d4sc01837k), 2024-01-01

## Supporting Information

### Access to Distal Biaxial Atropisomers by Iridium Catalyzed Asymmetric C–H Alkylation

Xueqing Hu,<sup>†,[a]</sup> Yunxu Zhao,<sup>†,[a]</sup> Tong He,<sup>[b]</sup> Caoyue Niu,<sup>[a]</sup> Feipeng Liu,<sup>[a]</sup> Wei Jia,<sup>[a]</sup> Yi Mu,<sup>[a]</sup>  
Xingwei Li\*<sup>[b]</sup> and Zi-Qiang Rong\*<sup>[a]</sup>

[a] Frontiers Science Center for Flexible Electronics (FSCFE), Shaanxi Institute of Flexible  
Electronics (SIFE), Northwestern Polytechnical University (NPU), Xi'an 710072, China

[b] School of Chemistry and Chemical Engineering, Shaanxi Normal University (SNNU), Xi'an  
710119, China

\*Corresponding author. Email: [lixw@snnu.edu.cn](mailto:lixw@snnu.edu.cn); [iamzqrong@nwpu.edu.cn](mailto:iamzqrong@nwpu.edu.cn)

#### Table of Contents

|                                                                                                                           |    |
|---------------------------------------------------------------------------------------------------------------------------|----|
| I. General Information                                                                                                    | 2  |
| II. Synthesis of substrates <b>1</b>                                                                                      | 3  |
| III. Synthesis of substrates <b>2</b>                                                                                     | 7  |
| IV. Synthesis of substrates <b>4</b>                                                                                      | 8  |
| V. Synthesis of substrates <b>6</b>                                                                                       | 13 |
| VI. Optimization of the reaction conditions                                                                               | 16 |
| VII. General synthetic procedure and analytical data for distal biaxial chiral compounds <b>3</b> , <b>5</b> and <b>7</b> | 19 |
| VIII. Gram-scale reaction and synthetic transformations                                                                   | 68 |
| IX. Mechanistic studies                                                                                                   | 74 |
| X. Photophysical properties of selected compounds                                                                         | 75 |
| XI. References                                                                                                            | 76 |
| XII. X-ray Crystallographic data for <b>3ca</b> , <b>5m</b> , <b>7i</b> and <b>7k</b>                                     | 77 |
| XIII. <sup>1</sup> H NMR, <sup>13</sup> C NMR, and <sup>19</sup> F NMR spectra                                            | 85 |

## I. General Information

Unless noted otherwise, all solvents were dried by filtration through a Pure-Solv MD-5 Solvent Purification System (Innovative Technology). Sensitive reagents and solvents were transferred under nitrogen into a nitrogen-filled glovebox with standard techniques. Analytical thin-layer chromatography (TLC) was carried out using 0.2 mm commercial silica gel plates (silica gel 60, F254, Leyan chemical). Nuclear magnetic resonance spectra ( $^1\text{H}$  NMR,  $^2\text{H}$  NMR,  $^{13}\text{C}$  NMR and  $^{19}\text{F}$  NMR) were recorded with a Bruker Model DMX 500 (500 MHz,  $^1\text{H}$  at 500 MHz,  $^{13}\text{C}$  at 126 MHz,). Chemical shifts were reported in parts per million (ppm,  $\delta$ ), downfield from tetramethylsilane (TMS,  $\delta=0.00$  ppm) and were referenced to residual solvent ( $\text{CDCl}_3$ ,  $\delta=7.26$  ppm ( $^1\text{H}$ ) and 77.00 ppm ( $^{13}\text{C}$ ). All the  $^{19}\text{F}$  chemical shifts were not referenced. Coupling constants were reported in Hertz (Hz). Data for  $^1\text{H}$  NMR spectra were reported as follows: chemical shift (ppm, referenced to protium, s = singlet, d = doublet, t = triplet, q = quartet, quin = quintet, dd = doublet of doublets, td = triplet of doublets, ddd = doublet of doublet of doublets, m = multiplet, coupling constant (Hz), and integration). Commercially available materials were obtained from Rhawn Corporation, Leyan, Aladdin Bio-Chem Technology or Energy chemical and were used as received. High-resolution mass spectra (HRMS) were performed on a Waters Xevo G2-XS ToF Mass Spectrometry by electrospray ionization (ESI). IR spectra were collected on a Bruker Tensor II. and reported in unit of  $\text{cm}^{-1}$ . Melting Point were measured with Hanon MP430 Fully Automatic Video Melting Point Instrument. Absorption spectra were measured with a UV-Vis spectrophotometer (MAPADA, P7). Emission spectra were measured with an Edinburgh FLS 1000 spectrometer. Circular polarized luminescence (CPL) spectra were measured on a JASCO CPL-300 spectrometer. Circular dichroism (CD) spectra were measured on a JASCO J-815 CD Spectrometer. Chiral HPLC chromatograms were obtained from a Dionex UltiMate 3000 system. Optical rotation was measured on Anton Paar MCP 150 Automatic Polarimeter at concentrations of 0.1 g/10 mL in  $\text{CHCl}_3$ .

## II. Synthesis of substrates 1

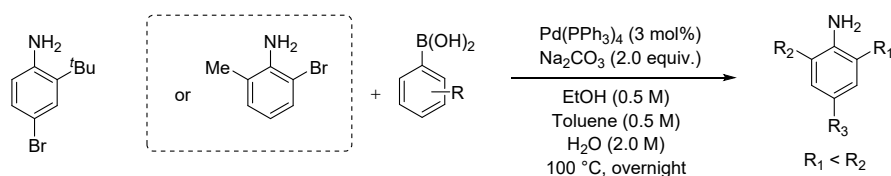

**General procedure A**<sup>[1]</sup>: To an oven-dried round bottom flask with reflux condenser equipped with a stir bar were added Pd(PPh<sub>3</sub>)<sub>4</sub> (3 mol%), Na<sub>2</sub>CO<sub>3</sub> (2.0 equiv.), substituted aniline (3 mmol, 1.0 equiv.), aryl boronic acid (1.5 equiv.), ethyl alcohol (0.5 M), toluene (0.5 M) and H<sub>2</sub>O (2.0 M). The reaction mixture was heated to 100 °C overnight. The reaction mixture was then allowed to stand at room temperature and the residue was concentrated. The crude mixture was purified by silica gel flash column chromatography to provide the desired compound for the next step.

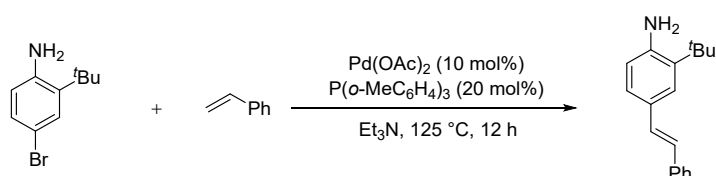

The synthesis of (*E*)-2-(*tert*-Butyl)-4-styrylaniline was carried out according to published procedures.<sup>[2]</sup> To a flask charged with 4-bromo-2-(*tert*-butyl)aniline (456.2 mg, 2.0 mmol, 1.0 equiv.), styrene (312.5 mg, 3.0 mmol, 1.5 equiv.), Pd(OAc)<sub>2</sub> (45 mg, 0.2 mmol, 0.1 equiv.) and P(*o*-MeC<sub>6</sub>H<sub>4</sub>)<sub>3</sub> (138.2 mg, 0.4 mmol, 0.2 equiv.), then Et<sub>3</sub>N (10 mL) was added. The mixture was stirred at 125 °C for 12 h under Ar. After the mixture was cooled to room temperature, filtered and concentrated in vacuo. The residue was purified by silica gel flash column chromatography to provide the desired compound for the next step.

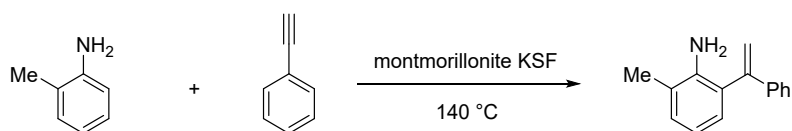

The synthesis of 2-methyl-6-(1-phenylvinyl)aniline was carried out according to published procedures.<sup>[3]</sup> Aniline (2 mmol), phenylacetylene (0.21 g, 2 mmol) and montmorillonite KSF (0.20 g) are introduced in a round bottomed flask equipped with magnetic stirrer and reflux condenser. The reaction mixture is heated at 140 °C (heating mantle) for 5 hours and then cooled to room temperature. The mixture was dissolved with dichloromethane and filtered. Then the solvent was concentrated in vacuo and the crude was purified by silica gel flash column chromatography to provide the desired compound for the next step.

The substrates **1** were prepared according to the general procedure B.<sup>[4]</sup>

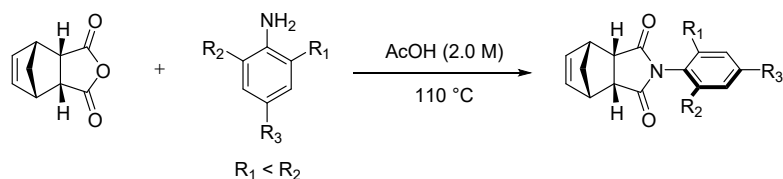

**General procedure B**: To a solution of the cis-5-norbornene-endo-2,3-dicarboxylic anhydride (4.5 mmol) in acetic acid (2.0 M) was added slowly primary amine (3 mmol) and the mixture was stirred at room temperature

until anhydride dissolved completely. Then the reaction mixture was refluxed for 3-5 h at 110 °C in preheated oil bath. After completion of the reaction, the reaction mixture was then allowed to cool down to room temperature and the whole reaction mixture was transferred to a 250 mL beaker. Saturated Na<sub>2</sub>CO<sub>3</sub> aqueous solution was added to the beaker containing reaction mixture until effervescence stop. The resulting mixture was extracted with DCM (60 mL × 3) and the combined organic layers were washed with brine (30 mL), dried over Na<sub>2</sub>SO<sub>4</sub> and filtered. Then organic solvent was concentrated under reduced pressure, the residue was purified by column chromatography (ethyl acetate/petroleum ether/dichloromethane = 1/3/1, v/v/v) to give the products **1**.

**(3aR,4S,7R,7aS)-2-(2-(*tert*-butyl)-4-(thiophen-3-yl)phenyl)-3a,4,7,7a-tetrahydro-1H-4,7-methanoisindole-1,3(2H)-dione (**1c**)**

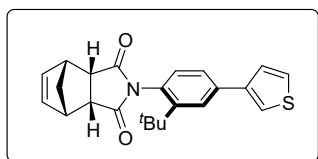

White solid, **m.p.** = 148–150 °C. <sup>1</sup>H NMR (500 MHz, CDCl<sub>3</sub>) δ 7.71 (d, *J* = 2.1 Hz, 1H), 7.42 - 7.40 (m, 2H), 7.38 - 7.37 (m, 1H), 7.33 (dd, *J* = 5.0, 1.4 Hz, 1H), 6.71 (d, *J* = 8.0 Hz, 1H), 6.35 - 6.34 (m, 2H), 3.53 - 3.51 (m, 2H), 3.46 - 3.45 (m, 2H), 1.81 - 1.79 (m, 1H), 1.63 - 1.61 (m, 1H), 1.32 (s, 9H). <sup>13</sup>C NMR (126 MHz, CDCl<sub>3</sub>) δ 178.3, 148.3, 142.0, 137.3, 135.1, 131.1, 129.8, 126.9, 126.6, 126.3, 125.5, 121.1, 52.4, 46.1, 45.2, 35.7, 31.6. **HRMS (ESI)**: Calculated for [C<sub>23</sub>H<sub>23</sub>NNaO<sub>2</sub>S, M+Na]<sup>+</sup>: 400.1342; Found: 400.1348.

**(3aR,4S,7R,7aS)-2-(2-(*tert*-butyl)-4-(furan-3-yl)phenyl)-3a,4,7,7a-tetrahydro-1H-4,7-methanoisindole-1,3(2H)-dione (**1d**)**

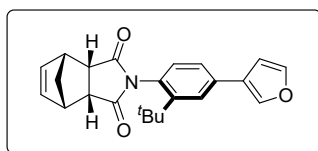

White solid, **m.p.** = 129–131 °C. <sup>1</sup>H NMR (500 MHz, CDCl<sub>3</sub>) δ 7.70 - 7.69 (m, 1H), 7.61 (d, *J* = 2.0 Hz, 1H), 7.47 - 7.46 (m, 1H), 7.31 (dd, *J* = 8.1, 2.0 Hz, 1H), 6.69 (d, *J* = 8.0 Hz, 1H), 6.66 - 6.65 (m, 1H), 6.34 - 6.33 (m, 2H), 3.53 - 3.51 (m, 2H), 3.46 - 3.45 (m, 2H), 1.81 - 1.79 (m, 1H), 1.62 - 1.61 (m, 1H), 1.31 (s, 9H). <sup>13</sup>C NMR (126 MHz, CDCl<sub>3</sub>) δ 178.3, 148.4, 143.7, 138.9, 135.1, 133.9, 131.1, 129.6, 126.25, 126.17, 125.0, 109.0, 52.4, 46.0, 45.2, 35.6, 31.6. **HRMS (ESI)**: Calculated for [C<sub>23</sub>H<sub>23</sub>NNaO<sub>3</sub>, M+Na]<sup>+</sup>: 384.1570; Found: 384.1575.

**(3aR,4S,7R,7aS)-2-(3-(*tert*-butyl)-4'-nitro-[1,1'-biphenyl]-4-yl)-3a,4,7,7a-tetrahydro-1H-4,7-methanoisindole-1,3(2H)-dione (**1g**)**

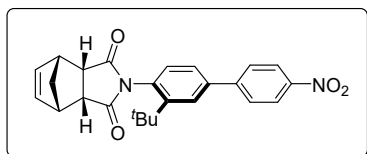

Yellow solid, **m.p.** = 217–219 °C. <sup>1</sup>H NMR (500 MHz, CDCl<sub>3</sub>) δ 8.31 - 8.28 (m, 2H), 7.73 (d, *J* = 2.0 Hz, 1H), 7.70 - 7.67 (m, 2H), 7.45 - 7.44 (m, 1H), 6.82 (d, *J* = 8.1 Hz, 1H), 6.37 - 6.36 (m, 2H), 3.56 - 3.53 (m,

2H), 3.50 - 3.49 (m, 2H), 1.84 - 1.82 (m, 1H), 1.66 - 1.64 (m, 1H), 1.35 (s, 9H).  $^{13}\text{C}$  NMR (126 MHz,  $\text{CDCl}_3$ )  $\delta$  178.2, 149.0, 147.3, 147.2, 140.1, 135.1, 131.62, 131.58, 128.1, 127.9, 126.3, 124.1, 52.5, 46.1, 45.3, 35.9, 31.6. **HRMS (ESI)**: Calculated for  $[\text{C}_{25}\text{H}_{24}\text{N}_2\text{NaO}_4, \text{M}+\text{Na}]^+$ : 439.1628; Found: 439.1630.

**(3aR,4S,7R,7aS)-2-(3-(*tert*-butyl)-2'-(trifluoromethyl)-[1,1'-biphenyl]-4-yl)-3a,4,7,7a-tetrahydro-1H-4,7-methanoisindole-1,3(2H)-dione (1h)**

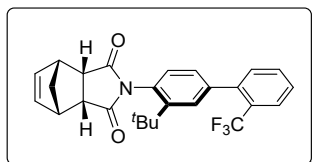

White solid, **m.p.** = 157–159 °C.  $^1\text{H}$  NMR (500 MHz,  $\text{CDCl}_3$ )  $\delta$  7.75 (d,  $J$  = 7.9 Hz, 1H), 7.57 - 7.54 (m, 1H), 7.49 - 7.45 (m, 2H), 7.34 (d,  $J$  = 7.6 Hz, 1H), 7.19 - 7.17 (m, 1H), 6.72 (d,  $J$  = 7.9 Hz, 1H), 6.36 - 6.35 (m, 2H), 3.54 - 3.52 (m, 2H), 3.47 - 3.46 (m, 2H), 1.82 - 1.79 (m, 1H), 1.64 - 1.62 (m, 1H), 1.29 (s, 9H).  $^{13}\text{C}$  NMR (126 MHz,  $\text{CDCl}_3$ )  $\delta$  178.1, 147.4, 140.7, 135.1, 132.0, 131.4, 130.3, 130.1, 129.6, 128.5 (q,  $J_{\text{C-F}}$  = 30.3 Hz), 127.64, 127.56, 126.2 (q,  $J_{\text{C-F}}$  = 5.4 Hz), 125.1, 123.0, 52.4, 46.0, 45.3, 35.7, 31.6.  $^{19}\text{F}$  NMR (471 MHz,  $\text{CDCl}_3$ )  $\delta$  -56.6. **HRMS (ESI)**: Calculated for  $[\text{C}_{26}\text{H}_{24}\text{F}_3\text{NNaO}_2, \text{M}+\text{Na}]^+$ : 462.1651; Found: 462.1660.

**(3aR,4S,7R,7aS)-2-(3-(*tert*-butyl)-4'-methoxy-[1,1'-biphenyl]-4-yl)-3a,4,7,7a-tetrahydro-1H-4,7-methanoisindole-1,3(2H)-dione (1i)**

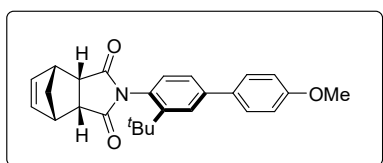

White solid, **m.p.** = 147–149 °C.  $^1\text{H}$  NMR (500 MHz,  $\text{CDCl}_3$ )  $\delta$  7.66 (d,  $J$  = 2.1 Hz, 1H), 7.49 - 7.46 (m, 2H), 7.37 - 7.35 (m, 1H), 6.98 - 6.95 (m, 2H), 6.72 (d,  $J$  = 8.1 Hz, 1H), 6.35 - 6.34 (m, 2H), 3.84 (s, 3H), 3.53 - 3.51 (m, 2H), 3.47 - 3.46 (m, 2H), 1.81 - 1.79 (m, 1H), 1.63 - 1.61 (m, 1H), 1.32 (s, 9H).  $^{13}\text{C}$  NMR (126 MHz,  $\text{CDCl}_3$ )  $\delta$  178.3, 159.4, 148.1, 142.2, 135.1, 133.4, 130.9, 129.4, 128.4, 127.3, 125.8, 114.2, 55.4, 52.4, 46.0, 45.3, 35.7, 31.7. **HRMS (ESI)**: Calculated for  $[\text{C}_{26}\text{H}_{27}\text{NNaO}_3, \text{M}+\text{Na}]^+$ : 424.1883; Found: 424.1889.

**(3aR,4S,7R,7aS)-2-(3-(*tert*-butyl)-2'-methyl-[1,1'-biphenyl]-4-yl)-3a,4,7,7a-tetrahydro-1H-4,7-methanoisindole-1,3(2H)-dione (1j)**

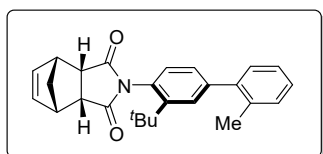

White solid, **m.p.** = 171–173 °C.  $^1\text{H}$  NMR (500 MHz,  $\text{CDCl}_3$ )  $\delta$  7.47 (d,  $J$  = 2.0 Hz, 1H), 7.27 - 7.26 (m, 2H), 7.24 - 7.23 (m, 2H), 7.19 - 7.17 (m, 1H), 6.72 (d,  $J$  = 8.0 Hz, 1H), 6.36 - 6.35 (m, 2H), 3.54 - 3.51 (m, 2H), 3.47 - 3.46 (m, 2H), 2.29 (s, 3H), 1.82 - 1.79 (m, 1H), 1.64 - 1.61 (m, 1H), 1.30 (s, 9H).  $^{13}\text{C}$  NMR (126 MHz,  $\text{CDCl}_3$ )  $\delta$  178.3, 147.5, 142.9, 141.3, 135.4, 135.1, 130.5, 130.3, 129.9, 129.8, 129.4, 128.0, 127.5, 125.9, 52.4, 46.0, 45.3, 35.7, 31.7, 20.6. **HRMS (ESI)**: Calculated for  $[\text{C}_{26}\text{H}_{27}\text{NNaO}_2, \text{M}+\text{Na}]^+$ : 408.1934; Found:

408.1941.

**(3a*R*,4*S*,7*R*,7a*S*)-2-(3-(*tert*-butyl)-3'-methyl-[1,1'-biphenyl]-4-yl)-3a,4,7,7a-tetrahydro-1*H*-4,7-methanoisindole-1,3(2*H*)-dione (1k)**

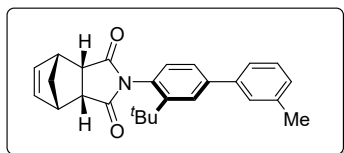

White solid, **m.p.** = 163–165 °C. <sup>1</sup>H NMR (500 MHz, CDCl<sub>3</sub>) δ 7.69 (d, *J* = 2.0 Hz, 1H), 7.39 (dd, *J* = 8.0, 2.1 Hz, 1H), 7.34 - 7.31 (m, 3H), 7.18 - 7.16 (m, 1H), 6.74 (d, *J* = 8.1 Hz, 1H), 6.36 - 6.35 (m, 2H), 3.54 - 3.51 (m, 2H), 3.47 - 3.46 (m, 2H), 2.41 (s, 3H), 1.81 - 1.79 (m, 1H), 1.63 - 1.61 (m, 1H), 1.33 (s, 9H). <sup>13</sup>C NMR (126 MHz, CDCl<sub>3</sub>) δ 178.3, 148.1, 142.7, 140.9, 138.4, 135.1, 130.9, 129.9, 128.7, 128.3, 128.2, 127.8, 126.2, 124.6, 52.4, 46.1, 45.3, 35.8, 31.7, 21.6. **HRMS (ESI)**: Calculated for [C<sub>26</sub>H<sub>27</sub>NNaO<sub>2</sub>, M+Na]<sup>+</sup>: 408.1934; Found: 408.1938.

**(3a*R*,4*S*,7*R*,7a*S*)-2-(3-(*tert*-butyl)-4'-methyl-[1,1'-biphenyl]-4-yl)-3a,4,7,7a-tetrahydro-1*H*-4,7-methanoisindole-1,3(2*H*)-dione (1l)**

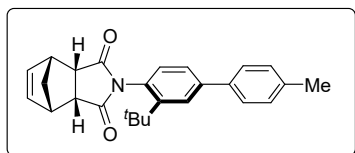

White solid, **m.p.** = 185–187 °C. <sup>1</sup>H NMR (500 MHz, CDCl<sub>3</sub>) δ 7.68 (d, *J* = 2.0 Hz, 1H), 7.44 - 7.42 (m, 2H), 7.39 (dd, *J* = 8.0, 2.1 Hz, 1H), 7.25 - 7.23 (m, 2H), 6.73 (d, *J* = 8.1 Hz, 1H), 6.36 - 6.35 (m, 2H), 3.54 - 3.52 (m, 2H), 3.47 - 3.46 (m, 2H), 2.39 (s, 3H), 1.82 - 1.79 (m, 1H), 1.64 - 1.61 (m, 1H), 1.32 (s, 9H). <sup>13</sup>C NMR (126 MHz, CDCl<sub>3</sub>) δ 178.3, 148.1, 142.5, 138.0, 137.4, 135.1, 130.9, 129.7, 129.5, 127.6, 127.2, 126.0, 52.4, 46.1, 45.3, 35.7, 31.7, 21.1. **HRMS (ESI)**: Calculated for [C<sub>26</sub>H<sub>27</sub>NNaO<sub>2</sub>, M+Na]<sup>+</sup>: 408.1934; Found: 408.1939.

### III. Synthesis of substrates 2

The substrates **2** were prepared according to the general procedure C.<sup>[5]</sup>

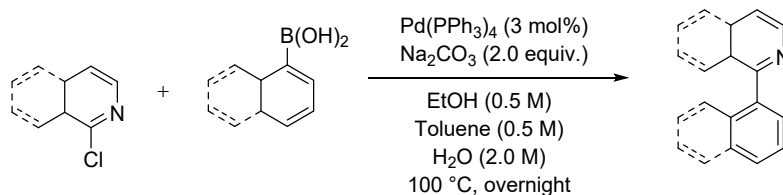

**General procedure C:** To an oven-dried round bottom flask with reflux condenser equipped with a stir bar were added  $\text{Pd(PPh}_3)_4$  (3 mol%),  $\text{Na}_2\text{CO}_3$  (2.0 equiv.), substituted quinoline (5 mmol, 1.0 equiv.), aryl boronic acid (1.5 equiv.), ethyl alcohol (0.5 M), toluene (0.5 M) and  $\text{H}_2\text{O}$  (2.0 M). The reaction mixture was heated to 100 °C overnight. The reaction mixture was then allowed to stand at room temperature and the residue was concentrated. The crude mixture was purified by column chromatography (ethyl acetate/petroleum ether = 1/5, v/v) to afford the resulting product **2**.

#### 2-(4-bromonaphthalen-1-yl)-3-methylpyridine (**2f**)

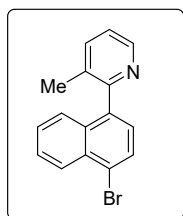

Yellow oil. **<sup>1</sup>H NMR** (500 MHz,  $\text{CDCl}_3$ )  $\delta$  8.59 - 8.58 (m, 1H), 8.32 (d,  $J$  = 8.5 Hz, 1H), 7.86 (d,  $J$  = 7.6 Hz, 1H), 7.64 - 7.62 (m, 1H), 7.59 - 7.56 (m, 1H), 7.44 - 7.38 (m, 2H), 7.28 - 7.25 (m, 2H), 2.04 (s, 3H). **<sup>13</sup>C NMR** (126 MHz,  $\text{CDCl}_3$ )  $\delta$  157.7, 147.1, 138.4, 138.0, 132.7, 132.6, 132.2, 129.5, 127.6, 127.3, 127.2, 126.8, 126.0, 123.1, 122.8, 19.3. **HRMS (ESI):** Calculated for  $[\text{C}_{16}\text{H}_{12}\text{BrNNa}, \text{M}+\text{Na}]^+$ : 320.0045; Found: 320.0050.

#### 1-(2,3-dimethylphenyl)isoquinoline (**2i**)

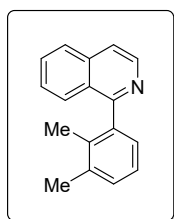

White solid, **m.p.** = 74–76 °C. **<sup>1</sup>H NMR** (500 MHz,  $\text{CDCl}_3$ )  $\delta$  8.60 (d,  $J$  = 5.8 Hz, 1H), 7.88 - 7.86 (m, 1H), 7.68 - 7.64 (m, 3H), 7.48 - 7.45 (m, 1H), 7.28 - 7.26 (m, 1H), 7.23 - 7.20 (m, 1H), 7.17 - 7.15 (m, 1H), 2.37 (s, 3H), 1.94 (s, 3H). **<sup>13</sup>C NMR** (126 MHz,  $\text{CDCl}_3$ )  $\delta$  162.1, 142.2, 139.2, 137.2, 136.3, 134.9, 130.1, 129.9, 127.7, 127.4, 127.1, 126.8, 125.3, 119.8, 20.4, 16.7. **HRMS (ESI):** Calculated for  $[\text{C}_{17}\text{H}_{15}\text{NNa}, \text{M}+\text{Na}]^+$ : 256.1097; Found: 256.1105.

## IV. Synthesis of substrates 4

The substrates **4** were prepared according to the general procedure D.<sup>[6]</sup>

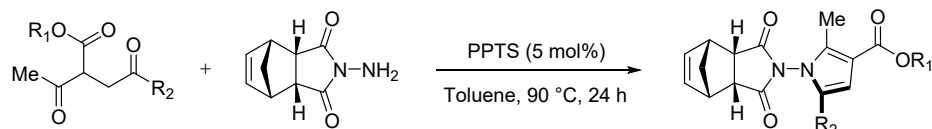

**General procedure D:** To a seal tube with oven-dried stir bar was added hydrazine (6 mmol, 1.2 equiv.) and PPTS (5 mol%) in toluene (25 mL). 1,4-dione (5 mmol, 1.0 equiv.) were then added. The mixture was allowed to stir at 90 °C for 24 h and cooled to room temperature. The residue was purified by column chromatography (ethyl acetate/petroleum ether = 1/5, v/v) as eluent to give N-aminopyrrole **4**.

### methyl 1-((3*aR*,4*S*,7*R*,7*aS*)-1,3-dioxo-1,3,3*a*,4,7,7*a*-hexahydro-2*H*-4,7-methanoisindol-2-yl)-2-methyl-5-phenyl-1*H*-pyrrole-3-carboxylate (**4a**)

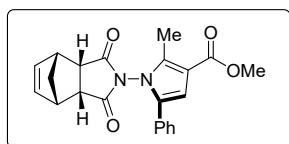

White solid, **m.p.** = 171–173 °C. <sup>1</sup>H NMR (500 MHz, CDCl<sub>3</sub>) δ 7.32 - 7.30 (m, 3H), 7.21 - 7.19 (m, 2H), 6.66 (s, 1H), 6.31 - 6.30 (m, 2H), 3.81 (s, 3H), 3.48 - 3.46 (m, 2H), 3.244 - 3.235 (m, 2H), 2.30 (s, 3H), 1.82 - 1.79 (m, 1H), 1.55 - 1.53 (m, 1H). <sup>13</sup>C NMR (126 MHz, CDCl<sub>3</sub>) δ 172.8, 164.9, 137.1, 135.7, 130.5, 127.4, 126.2, 125.7, 125.5, 112.0, 109.5, 52.3, 51.1, 45.0, 44.7, 11.1. **HRMS (ESI):** Calculated for [C<sub>22</sub>H<sub>21</sub>N<sub>2</sub>O<sub>4</sub>, M+H]<sup>+</sup>: 377.1496; Found: 377.1506.

### ethyl 1-((3*aR*,4*S*,7*R*,7*aS*)-1,3-dioxo-1,3,3*a*,4,7,7*a*-hexahydro-2*H*-4,7-methanoisindol-2-yl)-2-methyl-5-(*p*-tolyl)-1*H*-pyrrole-3-carboxylate (**4b**)

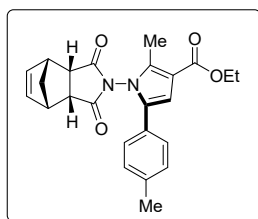

White solid, **m.p.** = 172–174 °C. <sup>1</sup>H NMR (500 MHz, CDCl<sub>3</sub>) δ 7.15 - 7.10 (m, 4H), 6.66 (s, 1H), 6.334 - 6.326 (m, 2H), 4.32 - 4.28 (m, 2H), 3.50 - 3.49 (m, 2H), 3.28 - 3.27 (m, 2H), 2.36 (s, 3H), 2.31 (s, 3H), 1.84 - 1.82 (m, 1H), 1.57 - 1.55 (m, 1H), 1.37 - 1.34 (m, 3H). <sup>13</sup>C NMR (126 MHz, CDCl<sub>3</sub>) δ 173.0, 164.8, 138.1, 136.3, 135.6, 133.0, 129.3, 128.2, 127.3, 112.1, 108.4, 59.7, 52.2, 44.9, 44.4, 21.2, 14.5, 11.1. **HRMS (ESI):** Calculated for [C<sub>24</sub>H<sub>24</sub>N<sub>2</sub>NaO<sub>4</sub>, M+Na]<sup>+</sup>: 427.1628; Found: 427.1637.

### methyl 1-((3*aR*,4*S*,7*R*,7*aS*)-1,3-dioxo-1,3,3*a*,4,7,7*a*-hexahydro-2*H*-4,7-methanoisindol-2-yl)-5-(4-methoxyphenyl)-2-methyl-1*H*-pyrrole-3-carboxylate (**4c**)



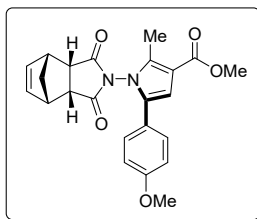

White solid, **m.p.** = 152–154 °C. **<sup>1</sup>H NMR** (500 MHz, CDCl<sub>3</sub>) δ 7.13 - 7.11 (m, 2H), 6.85 - 6.83 (m, 2H), 6.58 (s, 1H), 6.31 - 6.30 (m, 2H), 3.804 - 3.798 (m, 6H), 3.47 - 3.46 (m, 2H), 3.24 - 3.23 (m, 2H), 2.28 (s, 3H), 1.81 - 1.79 (m, 1H), 1.54 - 1.52 (m, 1H). **<sup>13</sup>C NMR** (126 MHz, CDCl<sub>3</sub>) δ 173.0, 165.2, 159.6, 136.2, 135.5, 132.8, 129.9, 122.5, 114.0, 111.7, 108.1, 55.3, 52.2, 51.0, 44.9, 44.4, 11.1. **HRMS (ESI)**: Calculated for [C<sub>23</sub>H<sub>22</sub>N<sub>2</sub>NaO<sub>5</sub>, M+Na]<sup>+</sup>: 429.1421; Found: 429.1429.

**ethyl 1-((3aR,4S,7R,7aS)-1,3-dioxo-1,3,3a,4,7,7a-hexahydro-2H-4,7-methanoisindol-2-yl)-5-(3-methoxyphenyl)-2-methyl-1H-pyrrole-3-carboxylate (4d)**

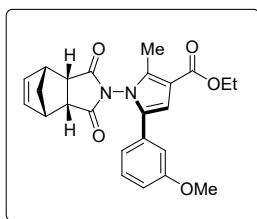

White solid, **m.p.** = 118–120 °C. **<sup>1</sup>H NMR** (500 MHz, CDCl<sub>3</sub>) δ 7.24 - 7.20 (m, 1H), 6.85 - 6.83 (m, 1H), 6.78 - 6.76 (m, 2H), 6.68 (s, 1H), 6.32 - 6.31 (m, 2H), 4.31 - 4.26 (m, 2H), 3.77 (s, 3H), 3.48 - 3.47 (m, 2H), 3.27 - 3.26 (m, 2H), 2.30 (s, 3H), 1.83 - 1.80 (m, 1H), 1.56 - 1.54 (m, 1H), 1.35 - 1.32 (m, 3H). **<sup>13</sup>C NMR** (126 MHz, CDCl<sub>3</sub>) δ 173.0, 164.7, 159.6, 136.7, 135.6, 132.9, 131.4, 129.6, 120.3, 114.3, 113.4, 112.2, 108.9, 59.8, 55.3, 52.2, 44.9, 44.4, 14.5, 11.1. **HRMS (ESI)**: Calculated for [C<sub>24</sub>H<sub>24</sub>N<sub>2</sub>NaO<sub>5</sub>, M+Na]<sup>+</sup>: 443.1577; Found: 443.1584.

**ethyl 1-((3aR,4S,7R,7aS)-1,3-dioxo-1,3,3a,4,7,7a-hexahydro-2H-4,7-methanoisindol-2-yl)-2-methyl-5-(naphthalen-1-yl)-1H-pyrrole-3-carboxylate (4e)**

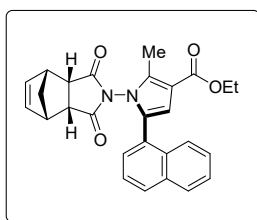

White solid, **m.p.** = 158–160 °C. **<sup>1</sup>H NMR** (500 MHz, CDCl<sub>3</sub>) δ 7.82 - 7.78 (m, 3H), 7.68 - 7.67 (m, 1H), 7.50 - 7.46 (m, 2H), 7.33 - 7.31 (m, 1H), 6.78 (s, 1H), 6.313 - 6.306 (m, 2H), 4.32 - 4.28 (m, 2H), 3.45 - 3.44 (m, 2H), 3.19 - 3.18 (m, 2H), 2.33 (s, 3H), 1.79 - 1.77 (m, 1H), 1.50 - 1.48 (m, 1H), 1.36 - 1.33 (m, 3H). **<sup>13</sup>C NMR** (126 MHz, CDCl<sub>3</sub>) δ 173.0, 164.7, 136.9, 135.6, 133.2, 133.0, 132.8, 128.3, 128.1, 127.7, 127.6, 127.3, 126.54, 126.47, 125.9, 112.4, 109.2, 59.8, 52.2, 44.9, 44.4, 14.5, 11.2. **HRMS (ESI)**: Calculated for [C<sub>27</sub>H<sub>24</sub>N<sub>2</sub>NaO<sub>4</sub>, M+Na]<sup>+</sup>: 463.1628; Found: 463.1635.

ethyl 1-((3*aR*,4*S*,7*R*,7*aS*)-1,3-dioxo-1,3,3*a*,4,7,7*a*-hexahydro-2*H*-4,7-methanoisindol-2-yl)-5-(4-fluorophenyl)-2-methyl-1*H*-pyrrole-3-carboxylate (**4f**)

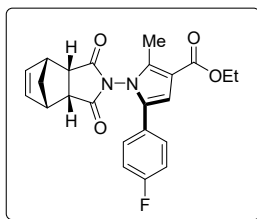

White solid, **m.p.** = 192–194 °C. <sup>1</sup>H NMR (500 MHz, CDCl<sub>3</sub>) δ 7.19 - 7.16 (m, 2H), 7.03 - 7.00 (m, 2H), 6.64 (s, 1H), 6.31 - 6.30 (m, 2H), 4.30 - 4.26 (m, 2H), 3.48 - 3.47 (m, 2H), 3.24 (dd, *J* = 2.9, 1.6 Hz, 2H), 2.29 (s, 3H), 1.83 - 1.80 (m, 1H), 1.56 - 1.53 (m, 1H), 1.35 - 1.32 (m, 3H). <sup>13</sup>C NMR (126 MHz, CDCl<sub>3</sub>) δ 173.0, 164.6, 162.7 (d, *J*<sub>C-F</sub> = 248.9 Hz), 136.5, 135.6, 131.9, 130.3 (d, *J*<sub>C-F</sub> = 8.2 Hz), 126.3 (d, *J*<sub>C-F</sub> = 3.4 Hz), 115.6 (d, *J*<sub>C-F</sub> = 21.7 Hz), 112.2, 108.9, 59.8, 52.3, 45.0, 44.3, 14.5, 11.2. <sup>19</sup>F NMR (471 MHz, CDCl<sub>3</sub>) δ -112.90 - -112.96 (m). **HRMS (ESI)**: Calculated for [C<sub>23</sub>H<sub>21</sub>FN<sub>2</sub>NaO<sub>4</sub>, M+Na]<sup>+</sup>: 431.1378; Found: 431.1389.

methyl 5-(4-chlorophenyl)-1-((3*aR*,4*S*,7*R*,7*aS*)-1,3-dioxo-1,3,3*a*,4,7,7*a*-hexahydro-2*H*-4,7-methanoisindol-2-yl)-2-methyl-1*H*-pyrrole-3-carboxylate (**4g**)

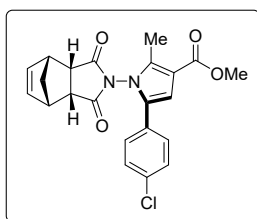

White solid, **m.p.** = 210–212 °C. <sup>1</sup>H NMR (500 MHz, CDCl<sub>3</sub>) δ 7.31 - 7.29 (m, 2H), 7.14 - 7.12 (m, 2H), 6.65 (s, 1H), 6.315 - 6.307 (m, 2H), 3.81 (s, 3H), 3.49 - 3.48 (m, 2H), 3.274 - 3.265 (m, 2H), 2.29 (s, 3H), 1.83 - 1.81 (m, 1H), 1.57 - 1.54 (m, 1H). <sup>13</sup>C NMR (126 MHz, CDCl<sub>3</sub>) δ 172.9, 165.0, 137.1, 135.6, 134.3, 131.8, 129.6, 128.9, 128.6, 112.1, 109.1, 52.3, 51.1, 45.0, 44.4, 11.1. **HRMS (ESI)**: Calculated for [C<sub>22</sub>H<sub>19</sub>ClN<sub>2</sub>NaO<sub>4</sub>, M+Na]<sup>+</sup>: 433.0926; Found: 433.0931.

methyl 1-((3*aR*,4*S*,7*R*,7*aS*)-1,3-dioxo-1,3,3*a*,4,7,7*a*-hexahydro-2*H*-4,7-methanoisindol-2-yl)-2-methyl-5-(thiophen-2-yl)-1*H*-pyrrole-3-carboxylate (**4h**)

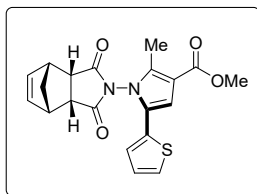

White solid, **m.p.** = 179–181 °C. <sup>1</sup>H NMR (500 MHz, CDCl<sub>3</sub>) δ 7.24 - 7.23 (m, 1H), 6.99 - 6.97 (m, 2H), 6.79 (s, 1H), 6.34 - 6.33 (m, 2H), 3.81 (s, 3H), 3.53 - 3.51 (m, 2H), 3.434 - 3.425 (m, 2H), 2.29 (s, 3H), 1.86 - 1.83 (m, 1H), 1.62 - 1.60 (m, 1H). <sup>13</sup>C NMR (126 MHz, CDCl<sub>3</sub>) δ 172.8, 164.9, 137.1, 135.7, 130.5, 127.4, 126.2, 125.7, 125.5, 112.0, 109.5, 52.3, 51.1, 45.0, 44.7, 11.1. **HRMS (ESI)**: Calculated for [C<sub>20</sub>H<sub>18</sub>N<sub>2</sub>NaO<sub>4</sub>S, M+Na]<sup>+</sup>: 405.0879; Found: 405.0887.

**methyl 1-((3*aR*,4*S*,7*R*,7*aS*)-1,3-dioxo-1,3,3*a*,4,7,7*a*-hexahydro-2*H*-4,7-methanoisindol-2-yl)-5-(furan-2-yl)-2-methyl-1*H*-pyrrole-3-carboxylate (4i)**

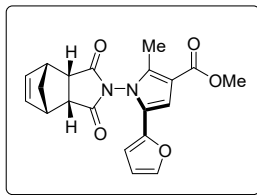

White solid, **m.p.** = 154–156 °C. **<sup>1</sup>H NMR** (500 MHz, CDCl<sub>3</sub>) δ 7.312 - 7.307 (m, 1H), 6.82 (s, 1H), 6.38 - 6.37 (m, 1H), 6.345 - 6.337 (m, 2H), 6.31 - 6.30 (m, 1H), 3.81 (s, 3H), 3.55 - 3.53 (m, 2H), 3.49 - 3.48 (m, 2H), 2.28 (s, 3H), 1.87 - 1.85 (m, 1H), 1.65 - 1.62 (m, 1H). **<sup>13</sup>C NMR** (126 MHz, CDCl<sub>3</sub>) δ 172.8, 164.8, 144.8, 141.8, 137.1, 135.6, 122.8, 112.0, 111.3, 108.4, 106.8, 52.3, 51.2, 45.1, 44.7, 10.8. **HRMS (ESI)**: Calculated for [C<sub>20</sub>H<sub>19</sub>N<sub>2</sub>O<sub>5</sub>, M+H]<sup>+</sup>: 367.1288; Found: 367.1294.

**ethyl 1-((3*aR*,4*S*,7*R*,7*aS*)-1,3-dioxo-1,3,3*a*,4,7,7*a*-hexahydro-2*H*-4,7-methanoisindol-2-yl)-2-methyl-5-phenyl-1*H*-pyrrole-3-carboxylate (4j)**

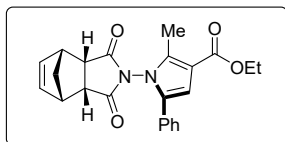

White solid, **m.p.** = 147–149 °C. **<sup>1</sup>H NMR** (500 MHz, CDCl<sub>3</sub>) δ 7.36 - 7.32 (m, 3H), 7.23 - 7.21 (m, 2H), 6.70 (s, 1H), 6.34 - 6.33 (m, 2H), 4.33 - 4.29 (m, 2H), 3.50 - 3.49 (m, 2H), 3.27 - 3.26 (m, 2H), 2.32 (s, 3H), 1.84 - 1.82 (m, 1H), 1.57 - 1.55 (m, 1H), 1.37 - 1.34 (m, 3H). **<sup>13</sup>C NMR** (126 MHz, CDCl<sub>3</sub>) δ 173.0, 164.7, 136.6, 135.6, 133.0, 130.2, 128.6, 128.3, 128.2, 112.2, 108.8, 59.8, 52.2, 44.9, 44.4, 14.5, 11.1. **HRMS (ESI)**: Calculated for [C<sub>23</sub>H<sub>22</sub>N<sub>2</sub>NaO<sub>4</sub>, M+Na]<sup>+</sup>: 413.1472; Found: 413.1479.

***tert*-butyl 1-((3*aR*,4*S*,7*R*,7*aS*)-1,3-dioxo-1,3,3*a*,4,7,7*a*-hexahydro-2*H*-4,7-methanoisindol-2-yl)-2-methyl-5-phenyl-1*H*-pyrrole-3-carboxylate (4k)**

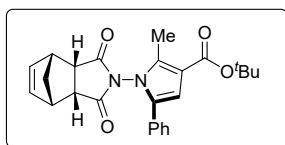

White solid, **m.p.** = 189–191 °C. **<sup>1</sup>H NMR** (500 MHz, CDCl<sub>3</sub>) δ 7.32 - 7.29 (m, 3H), 7.20 - 7.18 (m, 2H), 6.63 (s, 1H), 6.31 - 6.30 (m, 2H), 3.47 - 3.46 (m, 2H), 3.24 - 3.23 (m, 2H), 2.27 (s, 3H), 1.81 - 1.79 (m, 1H), 1.608 - 1.606 (m, 1H), 1.55 (s, 9H). **<sup>13</sup>C NMR** (126 MHz, CDCl<sub>3</sub>) δ 173.1, 164.1, 135.8, 135.6, 132.6, 130.3, 128.5, 128.3, 128.1, 113.7, 109.1, 52.2, 44.9, 44.4, 28.4, 11.1. **HRMS (ESI)**: Calculated for [C<sub>25</sub>H<sub>26</sub>N<sub>2</sub>NaO<sub>4</sub>, M+Na]<sup>+</sup>: 441.1785; Found: 441.1792.

**benzyl 1-((3*aR*,4*S*,7*R*,7*aS*)-1,3-dioxo-1,3,3*a*,4,7,7*a*-hexahydro-2*H*-4,7-methanoisindol-2-yl)-2-methyl-5-phenyl-1*H*-pyrrole-3-carboxylate (4l)**

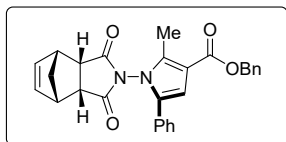

White solid, **m.p.** = 193–195 °C. **<sup>1</sup>H NMR** (500 MHz, CDCl<sub>3</sub>) δ 7.42 - 7.40 (m, 2H), 7.38 - 7.35 (m, 2H), 7.33 - 7.29 (m, 4H), 7.20 - 7.18 (m, 2H), 6.70 (s, 1H), 6.30 - 6.29 (m, 2H), 5.28 (s, 2H), 3.46 - 3.45 (m, 2H), 3.23 - 3.22 (m, 2H), 2.30 (s, 3H), 1.81 - 1.78 (m, 1H), 1.53 - 1.51 (m, 1H). **<sup>13</sup>C NMR** (126 MHz, CDCl<sub>3</sub>) δ 173.0, 164.4, 136.9, 136.6, 135.6, 133.1, 130.1, 128.6, 128.5, 128.3, 128.2, 128.02, 127.98, 111.9, 108.9, 65.6, 52.2, 44.9, 44.4, 11.2. **HRMS (ESI)**: Calculated for [C<sub>28</sub>H<sub>25</sub>N<sub>2</sub>O<sub>4</sub>, M+H]<sup>+</sup>: 453.1809; Found: 453.1820.

## V. Synthesis of substrates 6

The substrates **6a-6g** were prepared according to the general procedure B with cis-5-norbornene-exo-2,3-dicarboxylic anhydride. The substrates **6h-6i** were prepared according to the general procedure D with corresponding exo-hydrazine.

### (3*aR*,4*aR*,7*S*,7*aS*)-2-(2-(*tert*-butyl)phenyl)-3*a*,4,7,7*a*-tetrahydro-1*H*-4,7-methanoisindole-1,3(2*H*)-dione (6a)

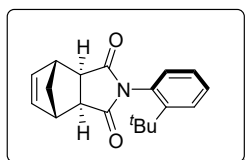

White solid, **m.p.** = 162–164 °C. **<sup>1</sup>H NMR** (500 MHz, Chloroform-*d*) δ 7.58 (d, *J* = 9.7 Hz, 1H), 7.40 - 7.38 (m, 1H), 7.29 - 7.27 (m, 1H), 6.81 - 6.79 (m, 1H), 6.353 - 6.345 (m, 2H), 3.46 - 3.45 (m, 2H), 2.882 - 2.879 (m, 2H), 1.69 - 1.66 (m, 1H), 1.57 - 1.55 (m, 1H), 1.30 (s, 9H). **<sup>13</sup>C NMR** (126 MHz, CDCl<sub>3</sub>) δ 178.4, 148.0, 138.1, 130.5, 130.0, 129.8, 128.8, 127.4, 48.1, 45.8, 43.6, 35.6, 31.6. **HRMS (ESI)**: Calculated for [C<sub>19</sub>H<sub>21</sub>NNaO<sub>2</sub>, M+Na]<sup>+</sup>: 318.1465; Found: 318.1476.

### (3*aR*,4*aR*,7*S*,7*aS*)-2-(3-(*tert*-butyl)-[1,1'-biphenyl]-4-yl)-3*a*,4,7,7*a*-tetrahydro-1*H*-4,7-methanoisindole-1,3(2*H*)-dione (6b)

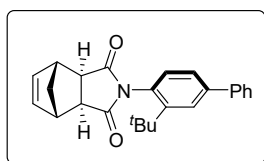

White solid, **m.p.** = 190–192 °C. **<sup>1</sup>H NMR** (500 MHz, Chloroform-*d*) δ 7.75 (d, *J* = 2.0 Hz, 1H), 7.57 - 7.55 (m, 2H), 7.47 - 7.43 (m, 3H), 7.38 - 7.35 (m, 1H), 6.88 - 6.87 (m, 1H), 6.36 - 6.35 (m, 2H), 3.475 - 3.467 (m, 2H), 2.903 - 2.900 (m, 2H), 1.70 - 1.68 (m, 1H), 1.59 - 1.57 (m, 1H), 1.35 (s, 9H). **<sup>13</sup>C NMR** (126 MHz, CDCl<sub>3</sub>) δ 178.5, 148.2, 142.8, 140.8, 138.1, 130.4, 129.6, 128.8, 128.0, 127.7, 127.4, 126.3, 48.2, 45.82, 45.79, 43.6, 35.8, 31.7. **HRMS (ESI)**: Calculated for [C<sub>25</sub>H<sub>26</sub>NO<sub>2</sub>, M+H]<sup>+</sup>: 372.1958; Found: 372.1964.

### (3*aR*,4*aR*,7*S*,7*aS*)-2-(3-(*tert*-butyl)-2'-methyl-[1,1'-biphenyl]-4-yl)-3*a*,4,7,7*a*-tetrahydro-1*H*-4,7-methanoisindole-1,3(2*H*)-dione (6c)

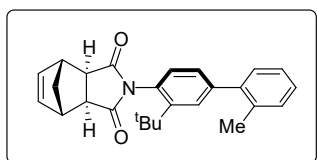

White solid, **m.p.** = 168–170 °C. **<sup>1</sup>H NMR** (500 MHz, Chloroform-*d*) δ 7.53 - 7.52 (m, 1H), 7.29 - 7.27 (m, 3H), 7.25 - 7.23 (m, 2H), 6.86 - 6.84 (m, 1H), 6.37 - 6.36 (m, 2H), 3.48 - 3.47 (m, 2H), 2.91 - 2.90 (m, 2H), 2.31 (s, 3H), 1.70 - 1.68 (m, 1H), 1.58 - 1.56 (m, 1H), 1.33 (s, 9H). **<sup>13</sup>C NMR** (126 MHz, CDCl<sub>3</sub>) δ 178.5, 147.6, 143.1, 141.2, 138.1, 135.4, 130.5, 130.0, 129.9, 129.7, 129.1, 128.1, 127.6, 125.9, 48.1, 45.9, 43.6,

35.8, 31.7, 20.6. **HRMS (ESI)**: Calculated for  $[C_{26}H_{27}NNaO_2, M+Na]^+$ : 408.1934; Found: 408.1937.

**(3aR,4R,7S,7aS)-2-(3-(tert-butyl)-2'-methoxy-[1,1'-biphenyl]-4-yl)-3a,4,7,7a-tetrahydro-1H-4,7-methanoisindole-1,3(2H)-dione (6d)**

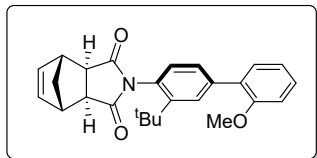

White solid, **m.p.** = 157–159 °C. **<sup>1</sup>H NMR** (500 MHz, Chloroform-d)  $\delta$  7.72 (d,  $J$  = 2.0 Hz, 1H), 7.44 - 7.42 (m, 1H), 7.34 - 7.31 (m, 2H), 7.05 - 7.02 (m, 1H), 6.99 - 6.98 (m, 1H), 6.83 - 6.81 (m, 1H), 6.36 - 6.35 (m, 2H), 3.80 (s, 3H), 3.47 - 3.46 (m, 2H), 2.90 - 2.89 (m, 2H), 1.69 - 1.67 (m, 1H), 1.58 - 1.56 (m, 1H), 1.33 (s, 9H). **<sup>13</sup>C NMR** (126 MHz, CDCl<sub>3</sub>)  $\delta$  178.6, 156.5, 147.2, 139.8, 138.1, 130.9, 130.4, 130.0, 129.4, 129.0, 128.9, 128.6, 120.9, 111.3, 55.5, 48.1, 45.8, 43.6, 35.7, 31.7. **HRMS (ESI)**: Calculated for  $[C_{26}H_{27}NNaO_3, M+Na]^+$ : 424.1883; Found: 424.1883.

**(3aR,4R,7S,7aS)-2-(3-(tert-butyl)-4'-methoxy-[1,1'-biphenyl]-4-yl)-3a,4,7,7a-tetrahydro-1H-4,7-methanoisindole-1,3(2H)-dione (6e)**

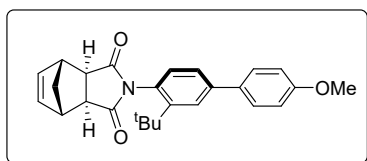

White solid, **m.p.** = 171–173 °C. **<sup>1</sup>H NMR** (500 MHz, Chloroform-d)  $\delta$  7.71 (d,  $J$  = 2.1 Hz, 1H), 7.50 - 7.48 (m, 2H), 7.43 - 7.41 (m, 1H), 6.99 - 6.97 (m, 2H), 6.85 - 6.84 (m, 1H), 6.36 - 6.35 (m, 2H), 3.86 (s, 3H), 3.48 - 3.47 (m, 2H), 2.902 - 2.899 (m, 2H), 1.70 - 1.68 (m, 1H), 1.57 - 1.56 (m, 1H), 1.35 (s, 9H). **<sup>13</sup>C NMR** (126 MHz, CDCl<sub>3</sub>)  $\delta$  178.5, 159.4, 148.1, 142.4, 138.1, 133.3, 130.3, 129.2, 128.5, 127.6, 125.8, 114.3, 55.4, 48.1, 45.8, 43.6, 35.7, 31.6. **HRMS (ESI)**: Calculated for  $[C_{26}H_{27}NNaO_3, M+Na]^+$ : 424.1883; Found: 424.1891.

**(3aR,4R,7S,7aS)-2-(2-(tert-butyl)-4-(tetrahydrofuran-3-yl)phenyl)-3a,4,7,7a-tetrahydro-1H-4,7-methanoisindole-1,3(2H)-dione (6f)**

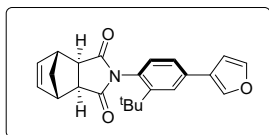

White solid, **m.p.** = 202–204 °C. **<sup>1</sup>H NMR** (500 MHz, Chloroform-d)  $\delta$  7.88 (d,  $J$  = 2.0 Hz, 1H), 7.55 - 7.53 (m, 1H), 7.481 - 7.476 (m, 1H), 6.82 - 6.80 (m, 1H), 6.68 - 6.67 (m, 1H), 6.48 - 6.47 (m, 1H), 6.36 - 6.35 (m, 2H), 3.47 - 3.45 (m, 2H), 2.89 - 2.88 (m, 2H), 1.69 - 1.68 (m, 1H), 1.55 - 1.52 (m, 1H), 1.34 (s, 9H). **<sup>13</sup>C NMR** (126 MHz, CDCl<sub>3</sub>)  $\delta$  178.4, 153.3, 148.4, 142.5, 138.1, 132.1, 130.5, 129.5, 124.2, 122.8, 111.8, 106.0, 48.1, 45.8, 43.6, 35.7, 31.6. **HRMS (ESI)**: Calculated for  $[C_{23}H_{24}NO_3, M+H]^+$ : 362.1751; Found: 362.1757.

**(3aR,4R,7S,7aS)-2-(4-bromo-2-(tert-butyl)phenyl)-3a,4,7,7a-tetrahydro-1H-4,7-methanoisindole-1,3(2H)-dione (6g)**

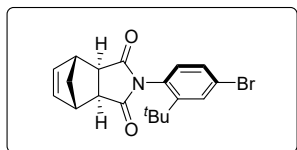

White solid, **m.p.** = 185–187 °C. **<sup>1</sup>H NMR** (500 MHz, Chloroform-d)  $\delta$  7.69 (d,  $J$  = 2.3 Hz, 1H), 7.41 - 7.39 (m, 1H), 6.68 - 6.66 (m, 1H), 6.35 - 6.34 (m, 2H), 3.45 - 3.44 (m, 2H), 2.879 - 2.876 (m, 2H), 1.69 - 1.66 (m, 1H), 1.49 - 1.47 (m, 1H), 1.29 (s, 9H). **<sup>13</sup>C NMR** (126 MHz, CDCl<sub>3</sub>)  $\delta$  178.5, 150.4, 138.0, 132.2, 131.7, 130.5, 129.7, 124.1, 48.1, 45.8, 43.6, 35.8, 31.4. **HRMS (ESI)**: Calculated for [C<sub>19</sub>H<sub>20</sub>BrNNaO<sub>2</sub>, M+Na]<sup>+</sup>: 396.0570; Found: 396.0576.

**methyl 5-(3-chlorophenyl)-1-((3aR,4R,7S,7aS)-1,3-dioxo-1,3,3a,4,7,7a-hexahydro-2H-4,7-methanoisindol-2-yl)-2-methyl-1H-pyrrole-3-carboxylate (6h)**

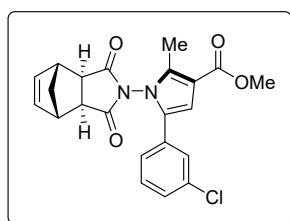

White solid, **m.p.** = 192–194 °C. **<sup>1</sup>H NMR** (500 MHz, Chloroform-d)  $\delta$  7.28 - 7.26 (m, 2H), 7.223 - 7.215 (m, 1H), 7.11 - 7.09 (m, 1H), 6.73 (s, 1H), 6.31 - 6.30 (m, 2H), 3.83 (s, 3H), 3.42 - 3.41 (m, 2H), 2.69 - 2.68 (m, 2H), 2.40 (s, 3H), 1.71 - 1.68 (m, 1H), 1.55 - 1.53 (m, 1H). **<sup>13</sup>C NMR** (126 MHz, CDCl<sub>3</sub>)  $\delta$  173.5, 164.9, 137.5, 137.1, 134.6, 131.8, 131.6, 129.9, 128.3, 128.0, 126.1, 112.3, 109.5, 51.2, 45.7, 45.0, 43.4, 10.7. **HRMS (ESI)**: Calculated for [C<sub>22</sub>H<sub>19</sub>ClN<sub>2</sub>NaO<sub>4</sub>, M+Na]<sup>+</sup>: 433.0926; Found: 433.0936.

**methyl 1-((3aR,4R,7S,7aS)-1,3-dioxo-1,3,3a,4,7,7a-hexahydro-2H-4,7-methanoisindol-2-yl)-2-methyl-5-phenyl-1H-pyrrole-3-carboxylate (6i)**

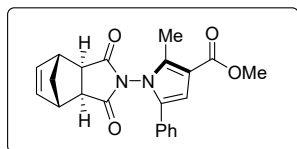

White solid, **m.p.** = 143–145 °C. **<sup>1</sup>H NMR** (500 MHz, Chloroform-d)  $\delta$  7.33 - 7.29 (m, 3H), 7.23 - 7.21 (m, 2H), 6.70 (s, 1H), 6.29 - 6.28 (m, 2H), 3.83 (s, 3H), 3.40 - 3.39 (m, 2H), 2.630 - 2.627 (m, 2H), 2.40 (s, 3H), 1.69 - 1.67 (m, 1H), 1.56 - 1.53 (m, 1H). **<sup>13</sup>C NMR** (126 MHz, CDCl<sub>3</sub>)  $\delta$  173.6, 165.1, 137.5, 136.5, 133.2, 130.1, 128.6, 128.29, 128.26, 112.1, 108.8, 51.1, 45.7, 44.9, 43.4, 10.7. **HRMS (ESI)**: Calculated for [C<sub>22</sub>H<sub>20</sub>N<sub>2</sub>NaO<sub>4</sub>, M+Na]<sup>+</sup>: 399.1315; Found: 399.1323.

## VI. Optimization of the reaction conditions

### 1. Construction of C–C and C–N atropisomers:

**Table S1. Screening of catalyst.**<sup>[a][b][c]</sup>

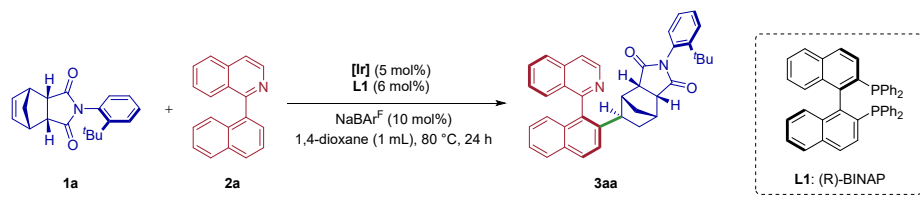

| entry    | cat.                                      | yield (%) | ee (%)    |
|----------|-------------------------------------------|-----------|-----------|
| 1        | [Ir(coe) <sub>2</sub> Cl] <sub>2</sub>    | -         | -         |
| 2        | [Ir(1,5-cod) <sub>2</sub> BF <sub>4</sub> | -         | -         |
| 3        | [IrCl(1,5-cod)] <sub>2</sub>              | -         | -         |
| <b>4</b> | <b>[Ir(OMe)(1,5-cod)]<sub>2</sub></b>     | <b>15</b> | <b>89</b> |

[a] Conditions: **1a** (0.05 mmol), **2a** (0.06 mmol), cat. (5 mol%), **L1** (6 mol %), NaBAR<sup>F</sup> (10 mol%) in 1,4-dioxane (1.0 mL) at 80 °C under N<sub>2</sub> for 24 h. [b] Yield was detected by <sup>1</sup>H NMR using 1,1,2,2-tetrachloroethane as the internal standard. [c] The enantiomeric ratio were determined by HPLC analysis with a chiral column.

**Table S2. Screening of ligand.**<sup>[a][b][c]</sup>

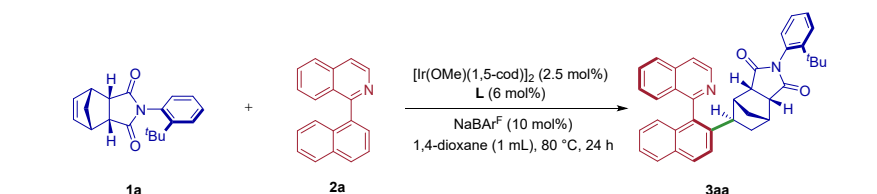

|                                                                                                                                           |                                                                                                                                         |                                                                                                                      |                                                                                                                          |                                                                                                                         |
|-------------------------------------------------------------------------------------------------------------------------------------------|-----------------------------------------------------------------------------------------------------------------------------------------|----------------------------------------------------------------------------------------------------------------------|--------------------------------------------------------------------------------------------------------------------------|-------------------------------------------------------------------------------------------------------------------------|
| <br><b>L1</b><br>15% yield, 89% ee                     | <br><b>L2</b><br>(Ar = p-Tolyl)<br>11% yield, 96% ee | <br><b>L3</b><br>9% yield, 73% ee | <br><b>L4</b><br>> 99% yield, 36% ee | <br><b>L5</b><br>71% yield, 18% ee |
| <br><b>L6</b><br>(Ar = 3,5-xylyl)<br>26% yield, 22% ee | <br><b>L7</b><br>trace                               | <br><b>L8</b><br>trace            | <br><b>L9</b><br>trace               | <br><b>L10</b><br>trace            |

[a] Conditions: **1a** (0.05 mmol), **2a** (0.06 mmol), [Ir(OMe)(1,5-cod)]<sub>2</sub> (2.5 mol%), **L** (6 mol %), NaBAR<sup>F</sup> (10 mol%) in 1,4-dioxane (1.0 mL) at 80 °C under N<sub>2</sub> for 24 h. [b] Yield was detected by <sup>1</sup>H NMR using 1,1,2,2-tetrachloroethane as the internal standard. [c] The enantiomeric ratio were determined by HPLC analysis with a chiral column.

**Table S3. Screening of amount of the solvent**<sup>[a][b][c]</sup>



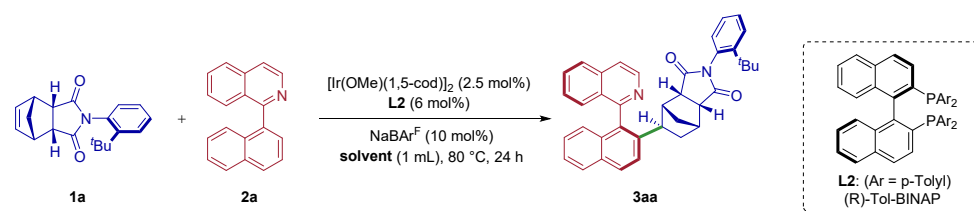

| entry    | cat.           | yield (%)     | ee (%)    |
|----------|----------------|---------------|-----------|
| 1        | Xylene         | 98            | 97        |
| 2        | DCE            | 76            | 96        |
| 3        | MTBE           | >99           | 96        |
| 4        | DCM            | 72            | 95        |
| <b>5</b> | <b>Toluene</b> | <b>&gt;99</b> | <b>97</b> |
| 6        | THF            | 37            | 95        |
| 7        | Ph-F           | >99           | 96        |

[a] Conditions: **1a** (0.05 mmol), **2a** (0.06 mmol), [Ir(OMe)(1,5-cod)]<sub>2</sub> (2.5 mol%), **L2** (6 mol %), NaBAR<sup>F</sup> (10 mol%) in solvent (1.0 mL) at 80 °C under N<sub>2</sub> for 24 h. [b] Yield was detected by <sup>1</sup>H NMR using 1,1,2,2-tetrachloroethane as the internal standard. [c] The enantiomeric ratio were determined by HPLC analysis with a chiral column. Abbreviations: DCE, dichloroethane. MTBE, methyl tert-butyl ether. DCM, dichloromethane. THF, tetrahydrofuran. Ph-F, fluorobenzene.

**Table S4. Screening of temperature**<sup>[a][b][c]</sup>

| entry    | T (°C)    | yield (%)     | ee (%)    |
|----------|-----------|---------------|-----------|
| 1        | 60        | 42            | 95        |
| <b>2</b> | <b>80</b> | <b>&gt;99</b> | <b>97</b> |
| 3        | 110       | >99           | 96        |

[a] Conditions: **1a** (0.05 mmol), **2a** (0.06 mmol), [Ir(OMe)(1,5-cod)]<sub>2</sub> (2.5 mol%), **L2** (6 mol %), NaBAR<sup>F</sup> (10 mol%) in toluene (1.0 mL) at T °C under N<sub>2</sub> for 24 h. [b] Yield was detected by <sup>1</sup>H NMR using 1,1,2,2-tetrachloroethane as the internal standard. [c] The enantiomeric ratio were determined by HPLC analysis with a chiral column.

## 2. Construction of C–C and N–N atropisomers:

**Table S5. Screening of catalyst**<sup>[a][b][c]</sup>

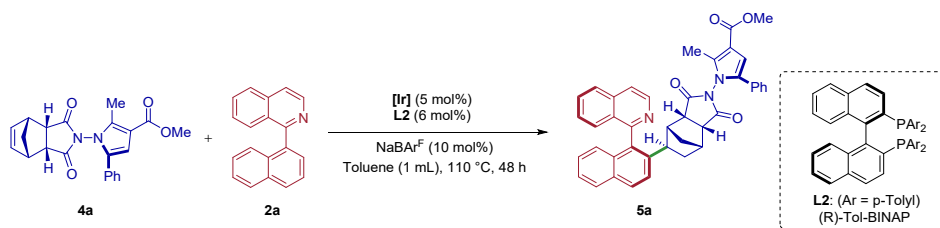

| entry    | cat.                                                | yield (%) | ee (%)    |
|----------|-----------------------------------------------------|-----------|-----------|
| 1        | $[\text{Ir}(\text{OMe})(1,5\text{-cod})]_2$         | 47        | 96        |
| <b>2</b> | <b><math>[\text{IrCl}(1,5\text{-cod})]_2</math></b> | <b>95</b> | <b>96</b> |
| 3        | $[\text{Ir}(\text{coe})_2\text{Cl}]_2$              | 79        | 96        |
| 4        | $\text{Ir}(\text{cod})_2\text{BARF}$                | -         | -         |
| 5        | $[\text{Ir}(1,5\text{-cod})_2]\text{BF}_4$          | trace     | -         |

[a] Conditions: **4a** (0.05 mmol), **2a** (0.06 mmol), cat. (5 mol%), **L2** (6 mol%), **NaBARF** (10 mol%) in toluene (1.0 mL) at 110 °C under  $\text{N}_2$  for 48 h.

[b] Yield was detected by  $^1\text{H}$  NMR using 1,1,2,2-tetrachloroethane as the internal standard. [c] The enantiomeric ratio were determined by HPLC analysis with a chiral column.

## VII. General synthetic procedure and analytical data for distal biaxial chiral compounds **3**, **5** and **7**

### 1. Construction of C–C and C–N atropisomers **3**:

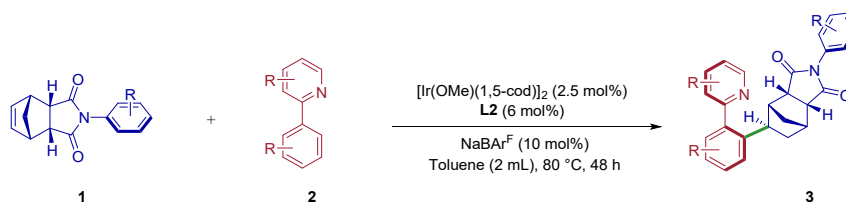

**General procedure E:** To an oven-dried 10 mL Schlenk tube containing a stirring bar was charged with  $[\text{Ir}(\text{OMe})(1,5\text{-cod})]_2$  (0.0025 mmol, 1.7 mg), **L2** (0.006 mmol, 4.1 mg) and 1.0 mL dry toluene in a nitrogen-filled glove-box, the mixture was stirred for 10 min at room temperature. Then corresponding substrate **1** (0.1 mmol, 1.0 equiv.), corresponding substrate **2** (0.12 mmol, 1.2 equiv.), NaBAR<sup>F</sup> (0.01 mmol, 8.9 mg) and another 1.0 mL dry toluene were added sequentially. The mixture was stirred at 80 °C for 48 hours, concentrated to dryness and the crude mixture was purified by flash column chromatography on silica gel using a mixture of Hexane/EtOAc (3/1, v/v) as eluent to obtain the desired product.

#### (**3aS,4R,5R,7S,7aR**)-2-(2-(*tert*-butyl)phenyl)-5-(1-(isoquinolin-1-yl)naphthalen-2-yl)hexahydro-1*H*-4,7-methanoisindole-1,3(2*H*)-dione (**3aa**)

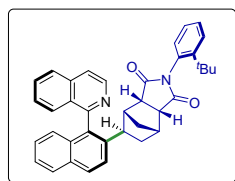

99% yield, white solid, **m.p.** = 159–161 °C. **<sup>1</sup>H NMR** (500 MHz, CDCl<sub>3</sub>) δ 8.68 (d, *J* = 5.7 Hz, 1H), 7.99 - 7.97 (m, 2H), 7.87 - 7.86 (m, 1H), 7.79 - 7.77 (m, 1H), 7.69 - 7.67 (m, 1H), 7.66 - 7.63 (m, 1H), 7.46 - 7.44 (m, 1H), 7.39 - 7.30 (m, 4H), 7.18 - 7.14 (m, 1H), 7.11 - 7.08 (m, 1H), 6.73 - 6.71 (m, 1H), 5.38 - 5.36 (m, 1H), 3.15 - 3.11 (m, 3H), 3.01 - 2.98 (m, 1H), 2.88 - 2.86 (m, 1H), 2.28 - 2.26 (m, 1H), 2.05 - 2.00 (m, 1H), 1.75 - 1.73 (m, 1H), 1.69 - 1.64 (m, 1H), 1.15 (s, 9H). **<sup>13</sup>C NMR** (126 MHz, CDCl<sub>3</sub>) δ 178.0, 176.9, 159.9, 147.6, 142.8, 140.7, 136.4, 135.5, 133.2, 132.1, 130.8, 130.4, 130.0, 129.3, 128.9, 128.7, 128.4, 127.9, 127.8, 127.2, 127.0, 126.8, 126.5, 125.8, 125.5, 123.1, 120.4, 49.0, 48.7, 44.3, 41.3, 39.5, 39.4, 36.2, 35.6, 31.6.

**HRMS (ESI):** Calculated for [C<sub>38</sub>H<sub>34</sub>N<sub>2</sub>NaO<sub>2</sub>, M+Na]<sup>+</sup>: 573.2512; Found: 573.2516.

**Optical Rotation:**  $[\alpha]_D^{25} = -107.1^\circ$  (*c* = 1.0, CHCl<sub>3</sub>).

**IR** (neat, cm<sup>-1</sup>) = 2343, 1708, 1367, 1172, 815, 749, 606.

**HPLC:** Daicel Chiralpak IC Column (*n*-Hexane/*i*-PrOH = 70 : 30, 1.0 mL/min), 30 °C, 254 nm, *R*<sub>t</sub> = 11.438 min (major) and 8.033 min (minor). 96% ee.

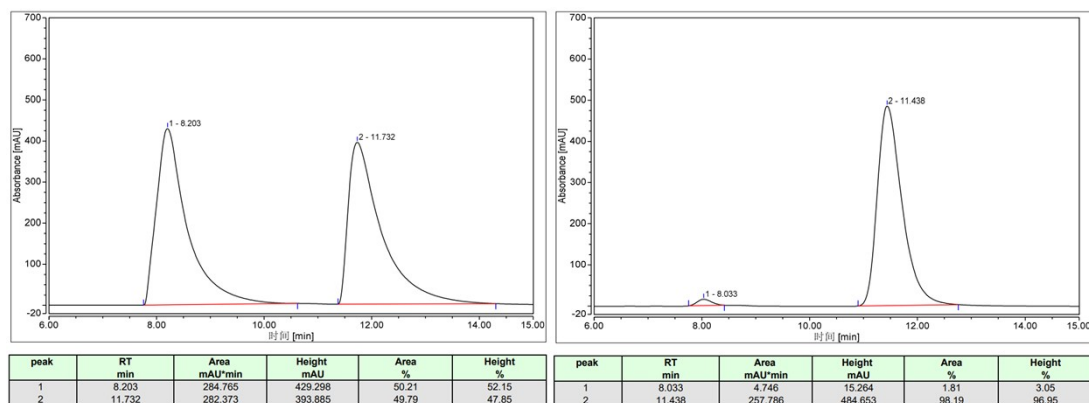

**(3*a*S,4*R*,5*R*,7*S*,7*a*R)-2-(3-(*tert*-butyl)-[1,1'-biphenyl]-4-yl)-5-(1-(isoquinolin-1-yl)naphthalen-2-yl)hexahydro-1*H*-4,7-methanoisoindole-1,3(2*H*)-dione (3*ab*)**

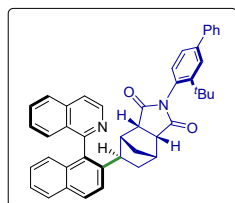

99% yield, white solid, **m.p.** = 288–290 °C. <sup>1</sup>H NMR (500 MHz, CDCl<sub>3</sub>) δ 8.71 (d, *J* = 5.8 Hz, 1H), 8.01 - 7.99 (m, 2H), 7.88 - 7.87 (m, 1H), 7.82 - 7.81 (m, 1H), 7.71 - 7.66 (m, 2H), 7.631 - 7.627 (m, 1H), 7.59 - 7.57 (m, 2H), 7.53 - 7.50 (m, 2H), 7.44 - 7.36 (m, 4H), 7.27 - 7.26 (m, 1H), 7.19 - 7.15 (m, 1H), 6.73 - 6.71 (m, 1H), 5.41 - 5.40 (m, 1H), 3.18 - 3.16 (m, 3H), 3.04 - 3.01 (m, 1H), 2.90 - 2.89 (m, 1H), 2.30 - 2.28 (m, 1H), 2.07 - 2.02 (m, 1H), 1.78 - 1.76 (m, 1H), 1.71 - 1.65 (m, 1H), 1.21 (s, 9H). <sup>13</sup>C NMR (126 MHz, CDCl<sub>3</sub>) δ 178.1, 177.0, 159.9, 147.9, 142.8, 142.2, 141.0, 140.7, 136.4, 135.5, 133.3, 132.1, 130.8, 130.7, 129.2, 128.91, 128.89, 128.4, 128.0, 127.9, 127.8, 127.7, 127.4, 127.0, 126.8, 126.5, 126.1, 125.8, 125.5, 123.1, 120.4, 49.0, 48.7, 44.3, 41.4, 39.6, 39.4, 36.3, 35.8, 31.6.

**HRMS (ESI):** Calculated for [C<sub>44</sub>H<sub>39</sub>N<sub>2</sub>O<sub>2</sub>, M+H]<sup>+</sup>: 627.3006; Found: 627.3008.

**Optical Rotation:** [ $\alpha$ ]<sub>D</sub><sup>25</sup> = -169.5° (c = 1.0, CHCl<sub>3</sub>).

**IR** (neat, cm<sup>-1</sup>) = 2359, 2340, 1749, 1698, 1684, 1653, 1558, 1541, 1507, 1457, 669.

**HPLC:** Daicel Chiralpak IA Column (*n*-Hexane/*i*-PrOH = 70 : 30, 1.0 mL/min), 30 °C, 254 nm, *R*<sub>t</sub> = 16.280 min (major) and 21.480 min (minor). 94% ee.

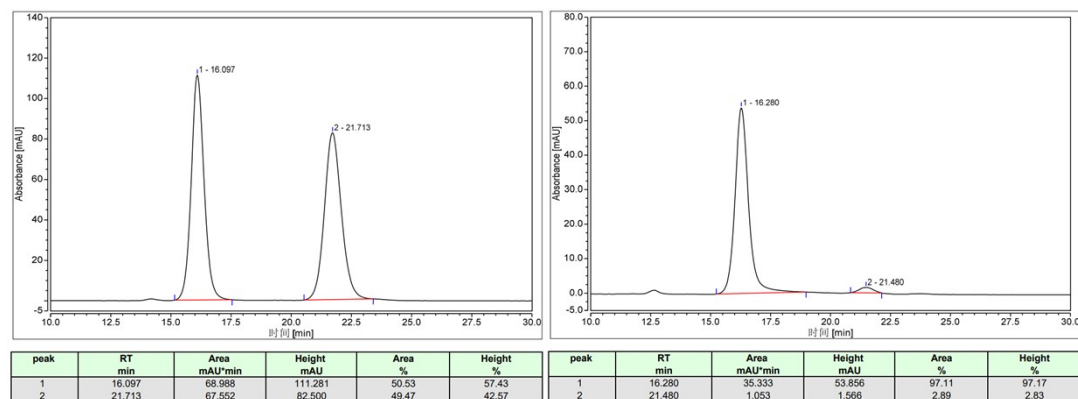

**(3a*S*,4*R*,5*R*,7*S*,7a*R*)-2-(2-(*tert*-butyl)-4-(thiophen-3-yl)phenyl)-5-(1-(isoquinolin-1-yl)naphthalen-2-yl)hexahydro-1*H*-4,7-methanoisoindole-1,3(2*H*)-dione (3ac)**

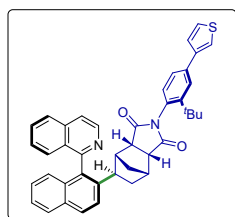

54% yield, white solid, **m.p.** = 282–284 °C. <sup>1</sup>H NMR (500 MHz, CDCl<sub>3</sub>) δ 8.70 (d, *J* = 5.7 Hz, 1H), 8.01 - 7.98 (m, 2H), 7.88 - 7.86 (m, 1H), 7.81 - 7.80 (m, 1H), 7.70 - 7.64 (m, 3H), 7.47 - 7.44 (m, 2H), 7.40 - 7.35 (m, 4H), 7.28 - 7.26 (m, 1H), 7.18 - 7.15 (m, 1H), 6.72 - 6.70 (m, 1H), 5.43 - 5.42 (m, 1H), 3.17 - 3.11 (m, 3H), 3.04 - 3.01 (m, 1H), 2.90 - 2.88 (m, 1H), 2.30 - 2.27 (m, 1H), 2.07 - 2.02 (m, 1H), 1.76 - 1.74 (m, 1H), 1.71 - 1.66 (m, 1H), 1.19 (s, 9H). <sup>13</sup>C NMR (126 MHz, CDCl<sub>3</sub>) δ 178.1, 176.9, 159.9, 148.0, 142.8, 142.1, 140.7, 136.9, 136.4, 135.5, 133.2, 132.1, 130.8, 129.0, 128.9, 128.4, 127.9, 127.8, 127.1, 127.0, 126.9, 126.6, 126.52, 126.47, 125.8, 125.6, 125.4, 123.1, 121.0, 120.4, 49.0, 48.7, 44.4, 41.3, 39.6, 39.4, 36.1, 35.7, 31.6.

**HRMS (ESI):** Calculated for [C<sub>42</sub>H<sub>37</sub>N<sub>2</sub>O<sub>2</sub>S, M+H]<sup>+</sup>: 633.2570; Found: 633.2573.

**Optical Rotation:** [ $\alpha$ ]<sub>D</sub><sup>25</sup> = -179.0° (c = 1.0, CHCl<sub>3</sub>).

**IR** (neat, cm<sup>-1</sup>) = 2361, 2341, 1772, 1748, 1699, 1652, 1522, 1473, 1419, 669.

**HPLC:** Daicel Chiralpak IA Column (*n*-Hexane/*i*-PrOH = 80 : 20, 1.0 mL/min), 30 °C, 254 nm, *R*<sub>t</sub> = 36.643 min (major) and 41.090 min (minor). 98% ee.

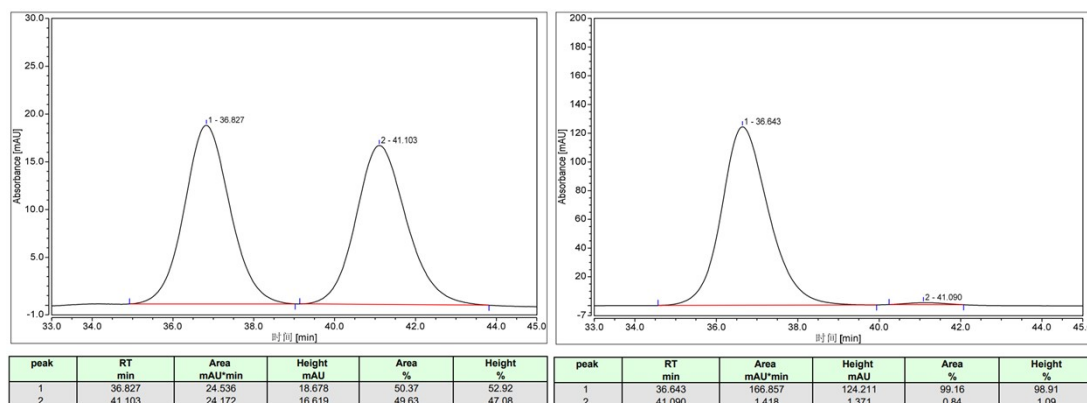

**(3a*S*,4*R*,5*R*,7*S*,7a*R*)-2-(2-(*tert*-butyl)-4-(furan-3-yl)phenyl)-5-(1-(isoquinolin-1-yl)naphthalen-2-yl)hexahydro-1*H*-4,7-methanoisoindole-1,3(2*H*)-dione (3ad)**

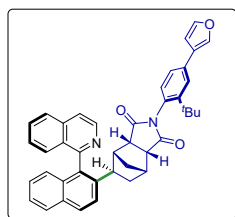

60% yield, white solid, **m.p.** = 257–259 °C. <sup>1</sup>H NMR (500 MHz, CDCl<sub>3</sub>) δ 8.70 (d, *J* = 5.8 Hz, 1H), 8.00 - 7.98 (m, 2H), 7.88 - 7.86 (m, 1H), 7.81 - 7.80 (m, 1H), 7.76 - 7.75 (m, 1H), 7.70 - 7.65 (m, 2H), 7.54 - 7.53

(m, 2H), 7.40 - 7.34 (m, 3H), 7.18 - 7.15 (m, 2H), 6.72 - 6.70 (m, 2H), 5.43 - 5.42 (m, 1H), 3.16 - 3.09 (m, 3H), 3.03 - 3.00 (m, 1H), 2.90 - 2.88 (m, 1H), 2.29 - 2.27 (m, 1H), 2.08 - 2.02 (m, 1H), 1.75 - 1.67 (m, 2H), 1.18 (s, 9H). <sup>13</sup>C NMR (126 MHz, CDCl<sub>3</sub>) δ 178.1, 176.9, 159.9, 148.1, 143.9, 142.8, 140.7, 138.8, 136.4, 135.5, 133.5, 133.2, 132.1, 130.9, 130.8, 128.91, 128.87, 128.4, 127.9, 127.8, 127.0, 126.9, 126.5, 126.4, 126.3, 125.8, 125.6, 124.9, 123.2, 120.4, 109.1, 49.0, 48.7, 44.5, 41.2, 39.6, 39.4, 36.0, 35.6, 31.6.

**HRMS (ESI):** Calculated for [C<sub>42</sub>H<sub>37</sub>N<sub>2</sub>O<sub>3</sub>, M+H]<sup>+</sup>: 617.2799; Found: 617.2805.

**Optical Rotation:** [α]<sub>D</sub><sup>25</sup> = -174.9° (c = 1.0, CHCl<sub>3</sub>).

**IR** (neat, cm<sup>-1</sup>) = 2346, 1705, 1369, 1161, 1062, 873, 812, 758.

**HPLC:** Daicel Chiralpak IA Column (*n*-Hexane/*i*-PrOH = 70 : 30, 1.0 mL/min), 30 °C, 254 nm, R<sub>t</sub> = 21.430 min (major) and 26.293 min (minor). 95% ee.

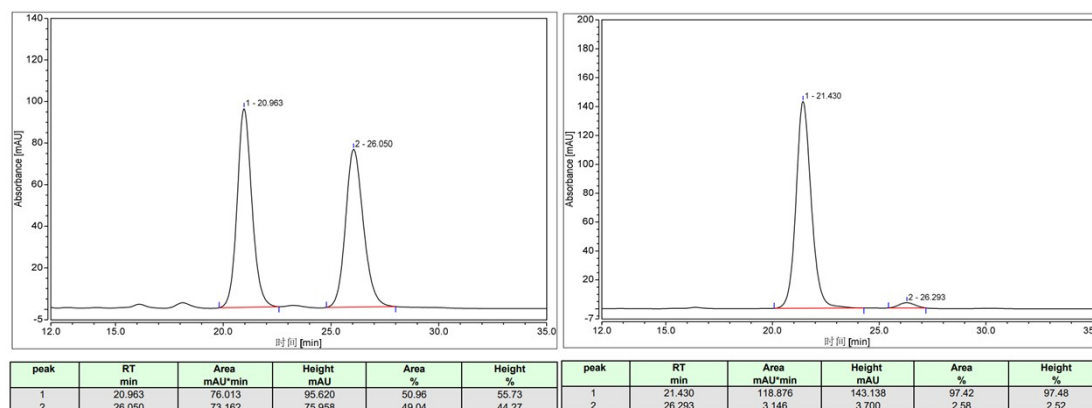

**(3a*S*,4*R*,5*R*,7*S*,7a*R*)-2-(4-bromo-2-(*tert*-butyl)phenyl)-5-(1-(isoquinolin-1-yl)naphthalen-2-yl)hexahydro-1*H*-4,7-methanoisoindole-1,3(2*H*)-dione (3a*c*)**

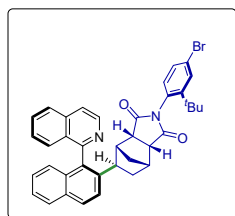

61% yield, white solid, **m.p.** = 275–277 °C. <sup>1</sup>H NMR (500 MHz, CDCl<sub>3</sub>) δ 8.68 (d, *J* = 5.8 Hz, 1H), 8.01 - 7.98 (m, 1H), 7.88 - 7.86 (m, 1H), 7.81 - 7.80 (m, 2H), 7.71 - 7.67 (m, 2H), 7.573 - 7.569 (m, 1H), 7.40 - 7.32 (m, 3H), 7.23 - 7.21 (m, 1H), 7.19 - 7.16 (m, 1H), 6.72 - 6.70 (m, 1H), 5.26 - 5.24 (m, 1H), 3.17 - 3.09 (m, 3H), 2.97 - 2.94 (m, 1H), 2.89 - 2.87 (m, 1H), 2.30 - 2.27 (m, 1H), 2.06 - 2.00 (m, 1H), 1.76 - 1.73 (m, 1H), 1.64 - 1.59 (m, 1H), 1.14 (s, 9H). <sup>13</sup>C NMR (126 MHz, CDCl<sub>3</sub>) δ 177.7, 176.6, 159.9, 150.1, 142.8, 140.5, 136.4, 135.5, 133.2, 132.1, 132.0, 131.9, 130.9, 130.3, 129.2, 128.9, 128.4, 128.0, 127.8, 127.0, 126.8, 126.5, 125.8, 125.6, 123.6, 123.0, 120.4, 49.0, 48.7, 44.4, 41.3, 39.5, 39.4, 36.0, 35.8, 31.4.

**HRMS (ESI):** Calculated for [C<sub>38</sub>H<sub>34</sub>BrN<sub>2</sub>O<sub>2</sub>, M+H]<sup>+</sup>: 629.1798; Found: 629.1806.

**Optical Rotation:** [α]<sub>D</sub><sup>25</sup> = -156.0° (c = 1.0, CHCl<sub>3</sub>).

**IR** (neat, cm<sup>-1</sup>) = 2967, 2347, 1706, 1389, 1362, 1260, 1161, 1085, 1016, 873, 792, 751, 696, 592.

**HPLC:** Daicel Chiralpak IA Column (*n*-Hexane/*i*-PrOH = 70 : 30, 1.0 mL/min), 30 °C, 254 nm, R<sub>t</sub> = 12.413 min (major) and 17.813 min (minor). 92% ee.

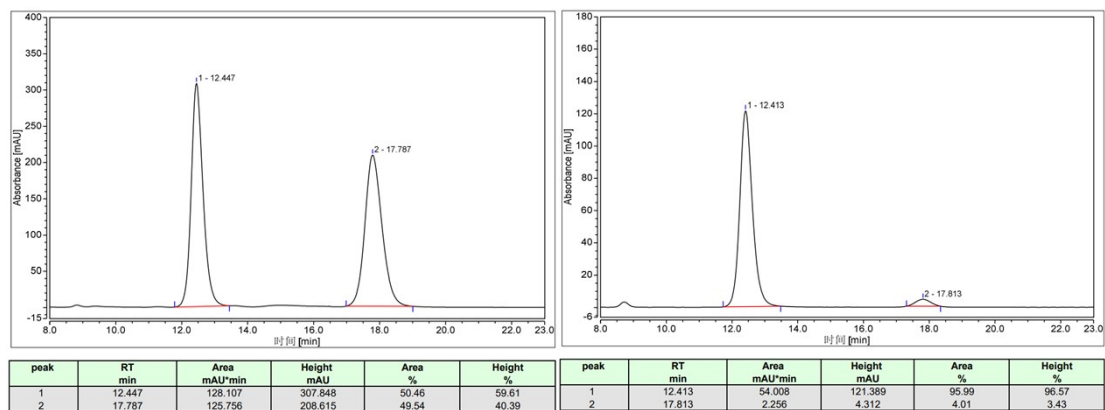

**(3a*S*,4*R*,5*R*,7*S*,7a*R*)-2-(2-(*tert*-butyl)-4-((*E*)-styryl)phenyl)-5-(1-(isoquinolin-1-yl)naphthalen-2-yl)hexahydro-1*H*-4,7-methanoisoindole-1,3(2*H*)-dione (3af)**

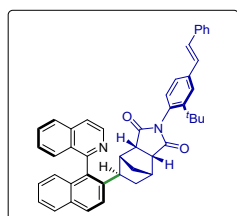

40% yield, white solid, **m.p.** = 116–118 °C. **<sup>1</sup>H NMR** (500 MHz, CDCl<sub>3</sub>) δ 8.71 (d, *J* = 5.7 Hz, 1H), 8.03 - 7.99 (m, 2H), 7.88 - 7.87 (m, 1H), 7.84 - 7.82 (m, 1H), 7.70 - 7.67 (m, 2H), 7.61 - 7.59 (m, 2H), 7.555 - 7.551 (m, 1H), 7.43 - 7.29 (m, 7H), 7.19 - 7.16 (m, 1H), 7.13 - 7.12 (m, 2H), 6.74 - 6.72 (m, 1H), 5.44 - 5.42 (m, 1H), 3.18 - 3.13 (m, 2H), 3.09 - 3.08 (m, 1H), 3.03 - 3.00 (m, 1H), 2.90 - 2.88 (m, 1H), 2.30 - 2.27 (m, 1H), 2.08 - 2.02 (m, 1H), 1.75 - 1.73 (m, 1H), 1.71 - 1.66 (m, 1H), 1.19 (s, 9H). **<sup>13</sup>C NMR** (126 MHz, CDCl<sub>3</sub>) δ 178.1, 176.9, 159.9, 147.9, 142.8, 140.7, 138.2, 137.1, 136.5, 135.6, 133.2, 132.1, 130.8, 129.9, 129.3, 128.9, 128.8, 128.5, 128.3, 128.0, 127.9, 127.8, 127.2, 127.0, 126.9, 126.7, 126.5, 125.8, 125.6, 124.8, 123.2, 120.5, 49.0, 48.7, 44.5, 41.2, 39.6, 39.4, 36.0, 35.7, 31.6.

**HRMS (ESI):** Calculated for [C<sub>46</sub>H<sub>41</sub>N<sub>2</sub>O<sub>2</sub>, M+H]<sup>+</sup>: 653.3163; Found: 653.3165.

**Optical Rotation:** [α]<sub>D</sub><sup>25</sup> = -164.9° (c = 1.0, CHCl<sub>3</sub>).

**IR** (neat, cm<sup>-1</sup>) = 2960, 2921, 2350, 1707, 1495, 1452, 1402, 1366, 1260, 1169, 1083, 1017, 797, 691, 630.

**HPLC:** Daicel Chiralpak IC Column (*n*-Hexane/*i*-PrOH = 80 : 20, 1.0 mL/min), 30 °C, 254 nm, *R*<sub>t</sub> = 18.653 min (major) and 23.720 min (minor). 96% ee.

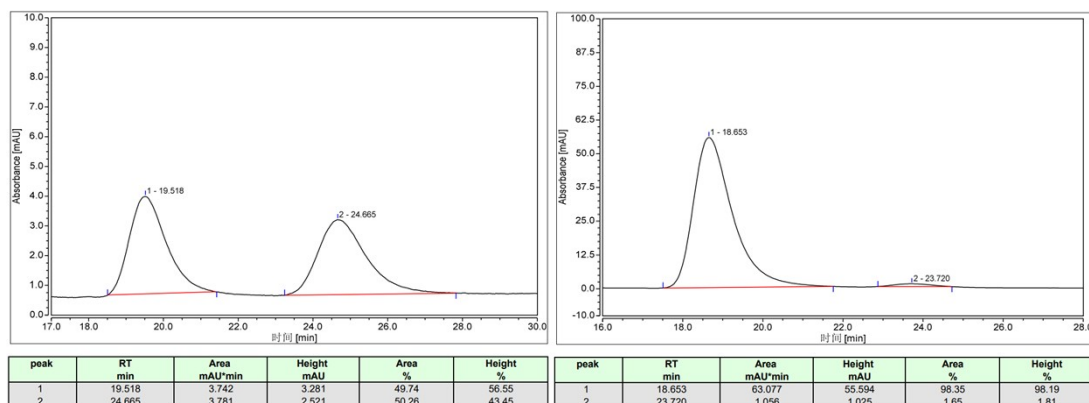

**(3a*S*,4*R*,5*R*,7*S*,7a*R*)-2-(3-(*tert*-butyl)-4'-nitro-[1,1'-biphenyl]-4-yl)-5-(1-(isoquinolin-1-yl)naphthalen-2-yl)hexahydro-1*H*-4,7-methanoisoindole-1,3(2*H*)-dione (3ag)**

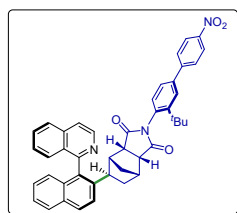

52% yield, white solid, **m.p.** = 150–152 °C. <sup>1</sup>H NMR (500 MHz, CDCl<sub>3</sub>) δ 8.71 (d, *J* = 5.8 Hz, 1H), 8.38 - 8.36 (m, 2H), 8.02 - 7.99 (m, 2H), 7.89 - 7.87 (m, 1H), 7.82 - 7.81 (m, 1H), 7.74 - 7.66 (m, 5H), 7.40 - 7.36 (m, 3H), 7.31 - 7.29 (m, 1H), 7.19 - 7.16 (m, 1H), 6.71 - 6.69 (m, 1H), 5.55 - 5.54 (m, 1H), 3.21 - 3.16 (m, 2H), 3.13 - 3.12 (m, 1H), 3.05 - 3.02 (m, 1H), 2.92 - 2.90 (m, 1H), 2.32 - 2.30 (m, 1H), 2.09 - 2.05 (m, 1H), 1.78 - 1.76 (m, 1H), 1.72 - 1.67 (m, 1H), 1.22 (s, 9H). <sup>13</sup>C NMR (126 MHz, CDCl<sub>3</sub>) δ 177.9, 176.8, 160.0, 148.7, 147.4, 147.3, 142.8, 140.5, 139.8, 136.4, 135.4, 133.2, 132.1, 131.3, 130.8, 129.0, 128.5, 128.1, 128.0, 127.8, 126.95, 126.89, 126.5, 126.2, 125.8, 125.6, 124.3, 123.1, 120.3, 49.1, 48.8, 44.5, 41.3, 39.6, 39.5, 36.1, 35.9, 31.6.

**HRMS (ESI):** Calculated for [C<sub>44</sub>H<sub>38</sub>N<sub>3</sub>O<sub>4</sub>, M+H]<sup>+</sup>: 672.2857; Found: 672.2857.

**Optical Rotation:** [α]<sub>D</sub><sup>25</sup> = -145.1° (c = 1.0, CHCl<sub>3</sub>).

**IR** (neat, cm<sup>-1</sup>) = 2960, 2923, 1709, 1596, 1513, 1343, 1260, 1169, 1084, 1015, 812, 797, 750, 694, 629.

**HPLC:** Daicel Chiralpak IA Column (*n*-Hexane/*i*-PrOH = 70 : 30, 1.0 mL/min), 30 °C, 254 nm, *R*<sub>t</sub> = 41.988 min (major) and 35.965 min (minor). 95% ee.

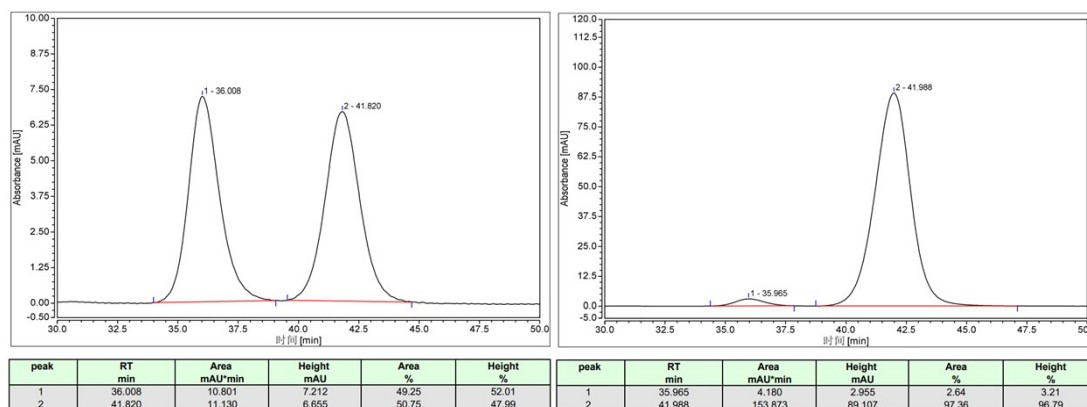

**(3a*S*,4*R*,5*R*,7*S*,7a*R*)-2-(3-(*tert*-butyl)-2'-(trifluoromethyl)-[1,1'-biphenyl]-4-yl)-5-(1-(isoquinolin-1-yl)naphthalen-2-yl)hexahydro-1*H*-4,7-methanoisoindole-1,3(2*H*)-dione (3ah)**

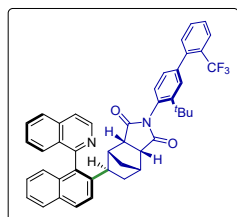

99% yield, white solid, **m.p.** = 140–142 °C. <sup>1</sup>H NMR (500 MHz, CDCl<sub>3</sub>) δ 8.65 (d, *J* = 5.7 Hz, 1H), 8.00 -



7.98 (m, 1H), 7.93 - 7.91 (m, 1H), 7.87 - 7.86 (m, 1H), 7.83 - 7.81 (m, 1H), 7.72 - 7.69 (m, 2H), 7.66 - 7.60 (m, 2H), 7.54 - 7.51 (m, 1H), 7.42 - 7.41 (m, 1H), 7.39 - 7.32 (m, 4H), 7.18 - 7.13 (m, 2H), 6.75 - 6.73 (m, 1H), 5.59 - 5.57 (m, 1H), 3.17 - 3.14 (m, 1H), 3.11 - 3.08 (m, 1H), 3.05 - 3.02 (m, 2H), 2.92 - 2.90 (m, 1H), 2.32 - 2.30 (m, 1H), 2.07 - 2.03 (m, 1H), 1.77 - 1.72 (m, 2H), 1.16 (s, 9H). <sup>13</sup>C NMR (126 MHz, CDCl<sub>3</sub>) δ 178.0, 176.6, 159.7, 147.2, 142.8, 140.9, 140.7, 140.4, 136.6, 135.6, 133.2, 132.1, 131.6, 130.7, 130.0, 129.7, 129.5, 128.9, 128.6, 128.45, 128.37, 127.8, 127.74, 127.67, 127.1, 126.7, 126.5, 126.3 (q, *J*<sub>C-F</sub> = 5.2 Hz), 125.9, 125.6, 124.2 (q, *J*<sub>C-F</sub> = 274.3 Hz), 123.3, 120.5, 49.1, 48.6, 44.9, 41.1, 39.6, 39.4, 35.7, 31.6. <sup>19</sup>F NMR (471 MHz, CDCl<sub>3</sub>) δ -56.41.

**HRMS (ESI):** Calculated for [C<sub>45</sub>H<sub>38</sub>F<sub>3</sub>N<sub>2</sub>O<sub>2</sub>, M+H]<sup>+</sup>: 695.2880; Found: 695.2883.

**Optical Rotation:** [ $\alpha$ ]<sub>D</sub><sup>25</sup> = -168.7° (c = 1.0, CHCl<sub>3</sub>).

**IR** (neat, cm<sup>-1</sup>) = 2964, 2350, 1709, 1484, 1394, 1366, 1312, 1168, 1107, 814, 747, 688, 596.

**HPLC:** Daicel Chiralcel OJ-H Column (*n*-Hexane/*i*-PrOH = 70 : 30, 1.0 mL/min), 30 °C, 254 nm, *R*<sub>t</sub> = 10.655 min (major) and 6.763 min (minor). 98% ee.

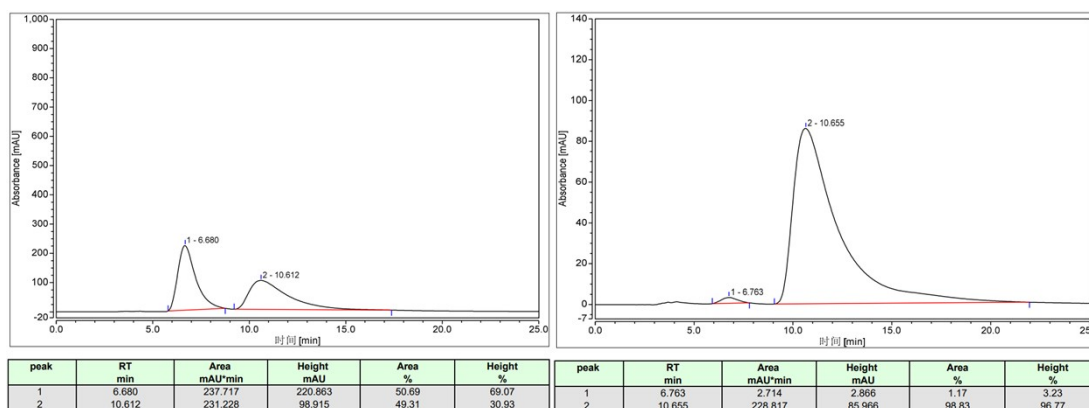

**(3a*S*,4*R*,5*R*,7*S*,7a*R*)-2-(3-(*tert*-butyl)-4'-methoxy-[1,1'-biphenyl]-4-yl)-5-(1-(isoquinolin-1-yl)naphthalen-2-yl)hexahydro-1*H*-4,7-methanoisindole-1,3(2*H*)-dione (3a*i*)**

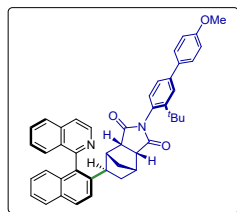

95% yield, white solid, **m.p.** = 258–260 °C. <sup>1</sup>H NMR (500 MHz, CDCl<sub>3</sub>) δ 8.71 (d, *J* = 5.8 Hz, 1H), 8.01 - 7.98 (m, 2H), 7.88 - 7.86 (m, 1H), 7.82 - 7.80 (m, 1H), 7.70 - 7.65 (m, 2H), 7.59 - 7.58 (m, 1H), 7.53 - 7.51 (m, 2H), 7.39 - 7.35 (m, 3H), 7.23 - 7.21 (m, 1H), 7.18 - 7.15 (m, 1H), 7.05 - 7.04 (m, 2H), 6.72 - 6.71 (m, 1H), 5.39 - 5.38 (m, 1H), 3.88 (s, 3H), 3.17 - 3.14 (m, 3H), 3.03 - 3.00 (m, 1H), 2.89 - 2.88 (m, 1H), 2.29 - 2.27 (m, 1H), 2.06 - 2.01 (m, 1H), 1.76 - 1.74 (m, 1H), 1.70 - 1.65 (m, 1H), 1.20 (s, 9H). <sup>13</sup>C NMR (126 MHz, CDCl<sub>3</sub>) δ 178.1, 177.0, 159.9, 159.5, 147.8, 142.8, 141.8, 140.7, 136.4, 135.5, 133.5, 133.3, 132.1, 130.8, 130.6, 128.9, 128.6, 128.44, 128.41, 128.0, 127.8, 127.4, 127.0, 126.9, 126.5, 125.8, 125.7, 125.6, 123.1, 120.4, 114.4, 55.4, 49.0, 48.7, 44.3, 41.4, 39.6, 39.5, 36.2, 35.7, 31.7.

**HRMS (ESI):** Calculated for [C<sub>45</sub>H<sub>41</sub>N<sub>2</sub>O<sub>3</sub>, M+H]<sup>+</sup>: 657.3112; Found: 657.3120.

**Optical Rotation:** [ $\alpha$ ]<sub>D</sub><sup>25</sup> = -164.2° (c = 1.0, CHCl<sub>3</sub>).

IR (neat,  $\text{cm}^{-1}$ ) = 2920, 1708, 1607, 1488, 1364, 1247, 1176, 1028, 812, 748, 692.

HPLC: Daicel Chiralpak IA Column (*n*-Hexane/*i*-PrOH = 70 : 30, 1.0 mL/min), 30 °C, 254 nm,  $R_t$  = 35.395 min (major) and 28.953 min (minor). 97% ee.

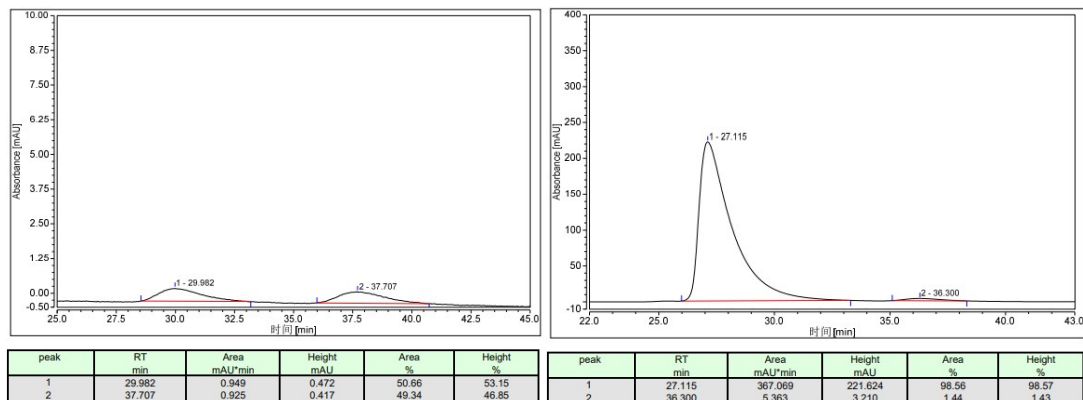

(*ent*)-**3ai**: 95% ee

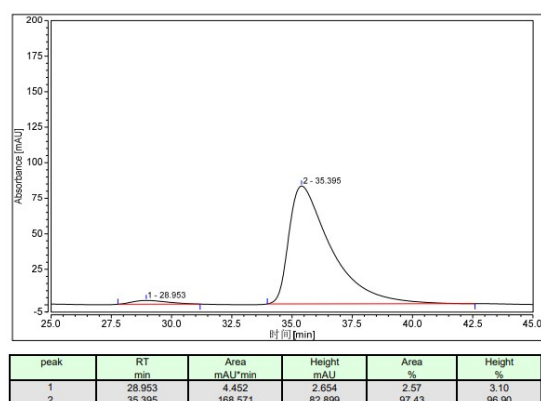

(*3aS,4R,5R,7S,7aR*)-2-(3-(*tert*-butyl)-2'-methyl-[1,1'-biphenyl]-4-yl)-5-(1-(isoquinolin-1-yl)naphthalen-2-yl)hexahydro-1*H*-4,7-methanoindole-1,3(2*H*)-dione (**3aj**)

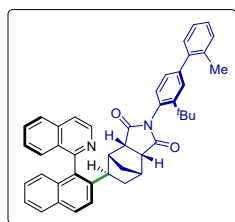

89% yield, white solid, **m.p.** = 220–222 °C. <sup>1</sup>H NMR (500 MHz,  $\text{CDCl}_3$ )  $\delta$  8.68 (d,  $J$  = 7.8 Hz, 1H), 7.99 - 7.98 (m, 1H), 7.95 - 7.93 (m, 1H), 7.87 - 7.85 (m, 1H), 7.76 - 7.75 (m, 1H), 7.70 - 7.68 (m, 1H), 7.65 - 7.62 (m, 1H), 7.40 - 7.26 (m, 8H), 7.17 - 7.13 (m, 1H), 7.07 - 7.05 (m, 1H), 6.72 - 6.70 (m, 1H), 5.39 - 5.38 (m, 1H), 3.16 - 3.14 (m, 3H), 3.03 - 3.00 (m, 1H), 2.89 - 2.87 (m, 1H), 2.36 (s, 3H), 2.29 - 2.27 (m, 1H), 2.05 - 2.01 (m, 1H), 1.76 - 1.74 (m, 1H), 1.71 - 1.66 (m, 1H), 1.17 (s, 9H). <sup>13</sup>C NMR (126 MHz,  $\text{CDCl}_3$ )  $\delta$  178.1, 177.0, 159.9, 147.2, 142.8, 142.5, 141.4, 140.8, 136.4, 135.5, 135.4, 133.3, 132.1, 130.8, 130.6, 130.0, 129.9, 128.9, 128.7, 128.4, 128.0, 127.9, 127.8, 127.6, 127.0, 126.8, 126.5, 126.0, 125.8, 125.6, 123.1, 120.4, 49.0, 48.7, 44.4, 41.4, 39.6, 39.5, 36.3, 35.8, 31.7, 20.7.

HRMS (ESI): Calculated for  $[\text{C}_{45}\text{H}_{41}\text{N}_2\text{O}_2, \text{M}+\text{H}]^+$ : 641.3163; Found: 641.3163.

**Optical Rotation:**  $[\alpha]_{\text{D}}^{25} = -164.5^{\circ}$  ( $c = 1.0$ ,  $\text{CHCl}_3$ ).

**IR** (neat,  $\text{cm}^{-1}$ ) = 2962, 2338, 1706, 1480, 1392, 1365, 1260, 1163, 1017, 758, 693, 629, 588.

**HPLC:** Daicel Chiralpak IA Column ( $n$ -Hexane/ $i$ -PrOH = 70 : 30, 1.0 mL/min), 30 °C, 254 nm,  $R_t = 13.902$  min (major) and 18.585 min (minor). 99% ee.

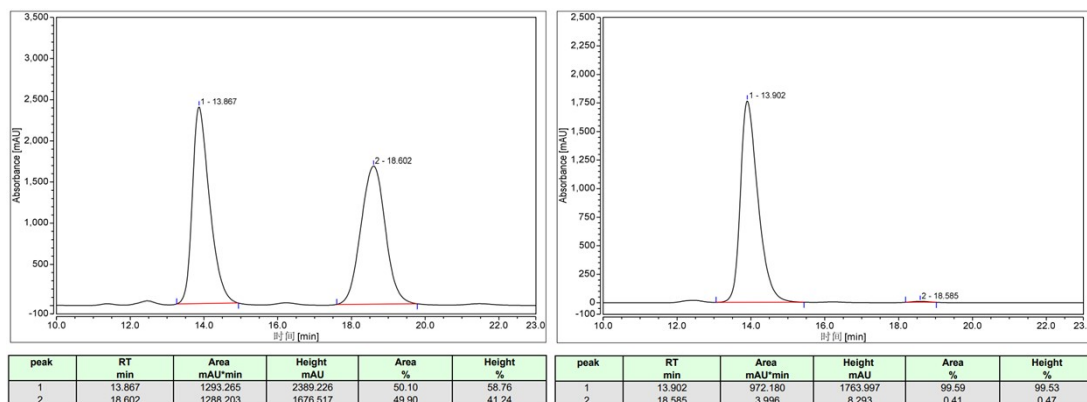

**(3*aS*,4*R*,5*R*,7*S*,7*aR*)-2-(3-(*tert*-butyl)-3'-methyl-[1,1'-biphenyl]-4-yl)-5-(1-(isoquinolin-1-yl)naphthalen-2-yl)hexahydro-1*H*-4,7-methanoisoindole-1,3(2*H*)-dione (3*ak*)**

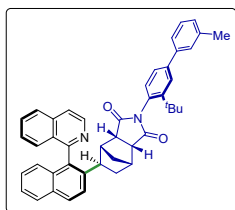

89% yield, white solid, **m.p.** = 289–291 °C. **<sup>1</sup>H NMR** (500 MHz,  $\text{CDCl}_3$ )  $\delta$  8.71 (d,  $J = 5.7$  Hz, 1H), 8.00 - 7.98 (m, 2H), 7.87 - 7.86 (m, 1H), 7.81 - 7.80 (m, 1H), 7.70 - 7.61 (m, 3H), 7.40 - 7.35 (m, 6H), 7.26 - 7.24 (m, 2H), 7.18 - 7.15 (m, 1H), 6.73 - 6.71 (m, 1H), 5.43 - 5.41 (m, 1H), 3.17 - 3.12 (m, 3H), 3.03 - 3.00 (m, 1H), 2.89 - 2.88 (m, 1H), 2.48 (s, 3H), 2.29 - 2.27 (m, 1H), 2.07 - 2.02 (m, 1H), 1.76 - 1.74 (m, 1H), 1.71 - 1.66 (m, 1H), 1.20 (s, 9H). **<sup>13</sup>C NMR** (126 MHz,  $\text{CDCl}_3$ )  $\delta$  178.1, 177.0, 159.9, 147.8, 142.8, 142.4, 141.1, 140.7, 138.5, 136.5, 135.5, 133.3, 132.1, 130.8, 130.6, 129.1, 128.9, 128.8, 128.4, 128.2, 128.0, 127.9, 127.8, 127.0, 126.8, 126.5, 126.1, 125.8, 125.6, 124.6, 123.1, 120.4, 49.1, 48.7, 44.3, 41.4, 39.6, 39.5, 36.2, 35.8, 31.7, 21.7.

**HRMS (ESI):** Calculated for  $[\text{C}_{45}\text{H}_{41}\text{N}_2\text{O}_2, \text{M}+\text{H}]^+$ : 641.3163; Found: 641.3199.

**Optical Rotation:**  $[\alpha]_{\text{D}}^{25} = -167.7^{\circ}$  ( $c = 1.0$ ,  $\text{CHCl}_3$ ).

**IR** (neat,  $\text{cm}^{-1}$ ) = 2920, 2350, 1705, 1485, 1365, 1160, 1079, 813, 758, 604, 589.

**HPLC:** Daicel Chiralpak IA Column ( $n$ -Hexane/ $i$ -PrOH = 80 : 20, 1.0 mL/min), 30 °C, 254 nm,  $R_t = 19.458$  min (major) and 24.377 min (minor). 98% ee.

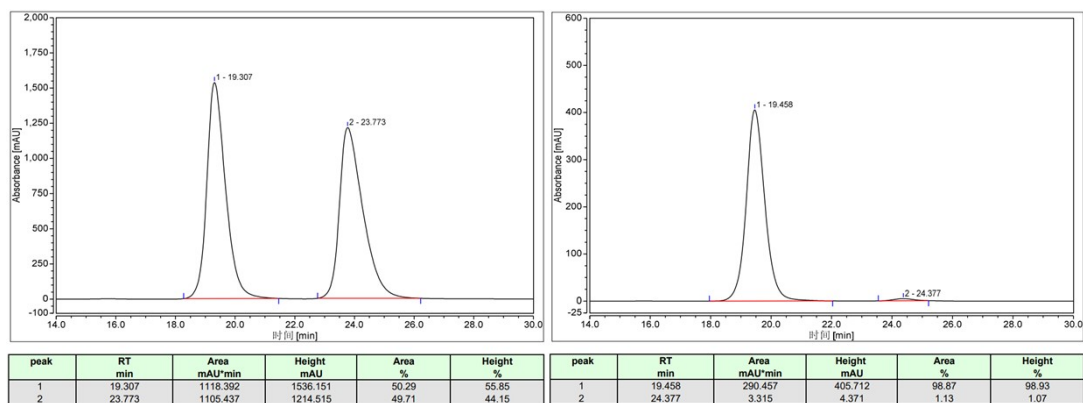

**(3a*S*,4*R*,5*R*,7*S*,7a*R*)-2-(3-(tert-butyl)-4'-methyl-[1,1'-biphenyl]-4-yl)-5-(1-(isoquinolin-1-yl)naphthalen-2-yl)hexahydro-1*H*-4,7-methanoisoindole-1,3(2*H*)-dione (3a)**

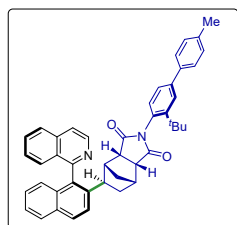

75% yield, white solid, **m.p.** = 302–304 °C. <sup>1</sup>H NMR (500 MHz, CDCl<sub>3</sub>) δ 8.71 (d, *J* = 5.7 Hz, 1H), 8.01 - 7.98 (m, 2H), 7.88 - 7.86 (m, 1H), 7.81 - 7.80 (m, 1H), 7.70 - 7.65 (m, 2H), 7.612 - 7.608 (m, 1H), 7.49 - 7.47 (m, 2H), 7.40 - 7.31 (m, 5H), 7.25 - 7.23 (m, 1H), 7.18 - 7.15 (m, 1H), 6.72 - 6.71 (m, 1H), 5.39 - 5.37 (m, 1H), 3.18 - 3.15 (m, 3H), 3.03 - 3.00 (m, 1H), 2.89 - 2.88 (m, 1H), 2.44 (s, 3H), 2.30 - 2.27 (m, 1H), 2.06 - 2.01 (m, 1H), 1.77 - 1.75 (m, 1H), 1.70 - 1.65 (m, 1H), 1.20 (s, 9H). <sup>13</sup>C NMR (126 MHz, CDCl<sub>3</sub>) δ 178.1, 177.0, 159.9, 147.8, 142.8, 142.2, 140.7, 138.2, 137.5, 136.4, 135.5, 133.3, 132.1, 130.8, 130.6, 129.6, 128.9, 128.4, 128.0, 127.8, 127.7, 127.3, 127.0, 126.8, 126.5, 125.9, 125.8, 125.5, 123.1, 120.4, 49.0, 48.7, 44.3, 41.4, 39.6, 39.4, 36.3, 35.7, 31.7, 21.2.

**HRMS (ESI):** Calculated for [C<sub>45</sub>H<sub>41</sub>N<sub>2</sub>O<sub>2</sub>, M+H]<sup>+</sup>: 641.3163; Found: 641.3168.

**Optical Rotation:** [α]<sub>D</sub><sup>25</sup> = -163.1° (c = 1.0, CHCl<sub>3</sub>).

**IR** (neat, cm<sup>-1</sup>) = 2922, 2357, 1705, 1486, 1364, 1084, 690, 837, 809, 758, 693.

**HPLC:** Daicel Chiralpak IA Column (*n*-Hexane/*i*-PrOH = 70 : 30, 1.0 mL/min), 30 °C, 254 nm, *R*<sub>t</sub> = 16.875 min (major) and 22.197 min (minor). 95% ee.

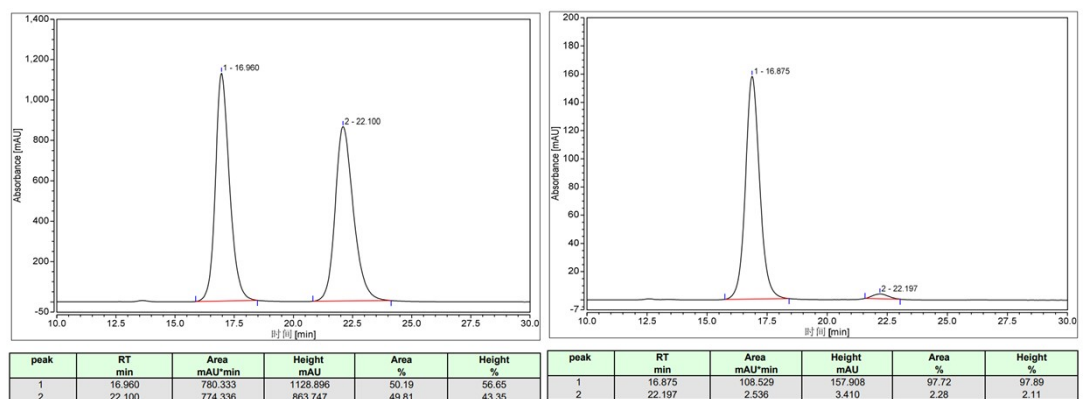

**(3a*S*,4*R*,5*R*,7*S*,7*aR*)-5-(1-(isoquinolin-1-yl)naphthalen-2-yl)-2-(2-methyl-6-(1-phenylvinyl)phenyl)hexahydro-1*H*-4,7-methanoisindole-1,3(2*H*)-dione (3am)**

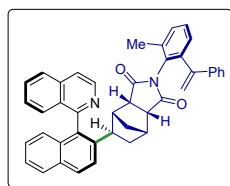

91% yield, white solid, **m.p.** = 94–96 °C. <sup>1</sup>H NMR (500 MHz, CDCl<sub>3</sub>) δ 8.60 (d, *J* = 5.7 Hz, 1H), 7.95 - 7.90 (m, 2H), 7.83 - 7.82 (m, 1H), 7.70 - 7.69 (m, 1H), 7.65 - 7.61 (m, 2H), 7.35 - 7.26 (m, 4H), 7.20 - 7.06 (m, 8H), 6.60 - 6.58 (m, 1H), 5.42 (s, 1H), 5.11 (s, 1H), 2.98 - 2.96 (m, 1H), 2.80 - 2.79 (m, 1H), 2.72 - 2.70 (m, 1H), 2.44 - 2.37 (m, 2H), 2.15 - 2.07 (m, 2H), 1.64 - 1.59 (m, 1H), 1.49 - 1.47 (m, 1H), 1.41 (s, 3H). <sup>13</sup>C NMR (126 MHz, CDCl<sub>3</sub>) δ 176.1, 174.8, 159.7, 147.2, 142.5, 140.6, 140.4, 140.1, 136.75, 136.70, 135.7, 133.3, 132.0, 130.4, 130.3, 129.7, 129.2, 128.9, 128.74, 128.65, 128.3, 128.0, 127.69, 127.66, 127.2, 126.9, 126.8, 126.4, 125.9, 125.5, 123.6, 120.6, 117.3, 48.8, 48.7, 44.4, 40.7, 39.3, 39.1, 35.0, 18.0.

**HRMS (ESI):** Calculated for [C<sub>43</sub>H<sub>35</sub>N<sub>2</sub>O<sub>2</sub>, M+H]<sup>+</sup>: 611.2693; Found: 611.2703.

**Optical Rotation:** [α]<sup>25</sup><sub>D</sub> = -63.0° (c = 1.0, CHCl<sub>3</sub>).

**IR** (neat, cm<sup>-1</sup>) = 2964, 2360, 1708, 1358, 1259, 1174, 1046, 795, 747, 698, 629.

**HPLC:** Daicel Chiralpak IA Column (*n*-Hexane/*i*-PrOH = 80 : 20, 1.0 mL/min), 30 °C, 254 nm, *R*<sub>t</sub> = 16.348 min (major) and 18.653 min (minor). 95% ee.

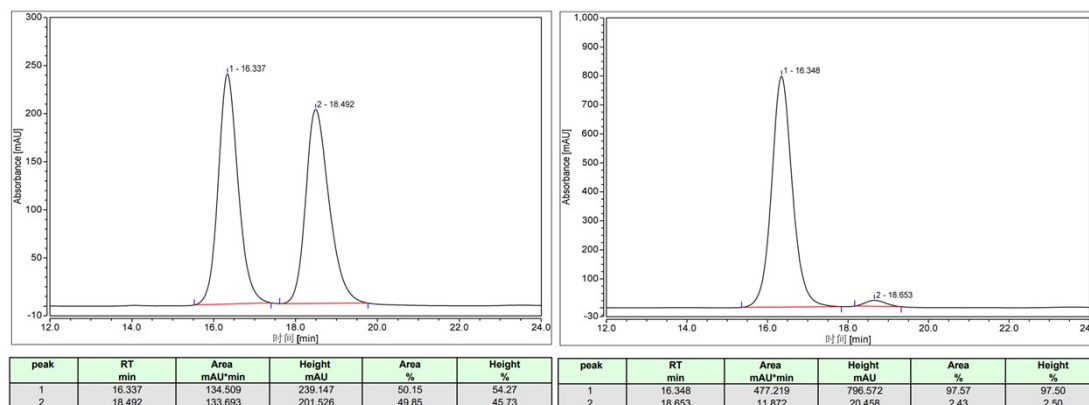

**(3a*S*,4*R*,5*R*,7*S*,7*aR*)-5-(1-(isoquinolin-1-yl)naphthalen-2-yl)-2-(3-methyl-[1,1'-biphenyl]-2-yl)hexahydro-1*H*-4,7-methanoisindole-1,3(2*H*)-dione (3an)**

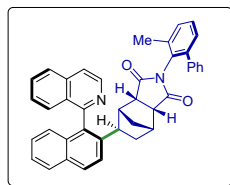

99% yield, white solid, **m.p.** = 133–135 °C. <sup>1</sup>H NMR (500 MHz, CDCl<sub>3</sub>) δ 8.66 (d, *J* = 5.8 Hz, 1H), 7.96 - 7.94 (m, 2H), 7.84 - 7.83 (m, 1H), 7.77 - 7.76 (m, 1H), 7.67 - 7.63 (m, 2H), 7.36 - 7.28 (m, 4H), 7.22 - 7.19 (m, 4H), 7.14 - 7.11 (m, 2H), 7.04 - 7.02 (m, 2H), 6.64 - 6.62 (m, 1H), 3.18 - 3.15 (m, 1H), 2.80 - 2.78 (m, 1H), 2.72 - 2.70 (m, 1H), 2.62 - 2.54 (m, 2H), 2.24 - 2.15 (m, 2H), 1.74 - 1.71 (m, 1H), 1.68 (s, 3H), 1.46 -

1.44 (m, 1H).  $^{13}\text{C}$  NMR (126 MHz,  $\text{CDCl}_3$ )  $\delta$  177.0, 175.7, 159.7, 142.7, 141.1, 140.3, 139.1, 136.8, 136.5, 135.8, 133.3, 132.0, 130.4, 130.0, 129.7, 129.3, 128.8, 128.7, 128.3, 128.1, 128.0, 127.7, 127.6, 127.4, 127.3, 127.0, 126.4, 125.9, 125.6, 123.9, 120.7, 49.0, 48.8, 45.1, 40.1, 39.6, 39.2, 34.0, 18.1.

**HRMS (ESI):** Calculated for  $[\text{C}_{41}\text{H}_{33}\text{N}_2\text{O}_2, \text{M}+\text{H}]^+$ : 585.2537; Found: 585.2549.

**Optical Rotation:**  $[\alpha]_D^{25} = -57.4^\circ$  ( $c = 1.0, \text{CHCl}_3$ ).

**IR** (neat,  $\text{cm}^{-1}$ ) = 2922, 2852, 1706, 1465, 1359, 1175, 815, 749, 701.

**HPLC:** Daicel Chiralpak IA Column ( $n$ -Hexane/ $i$ -PrOH = 80 : 20, 1.0 mL/min), 30 °C, 254 nm,  $R_t = 16.858$  min (major) and 14.938 min (minor). 96% ee.

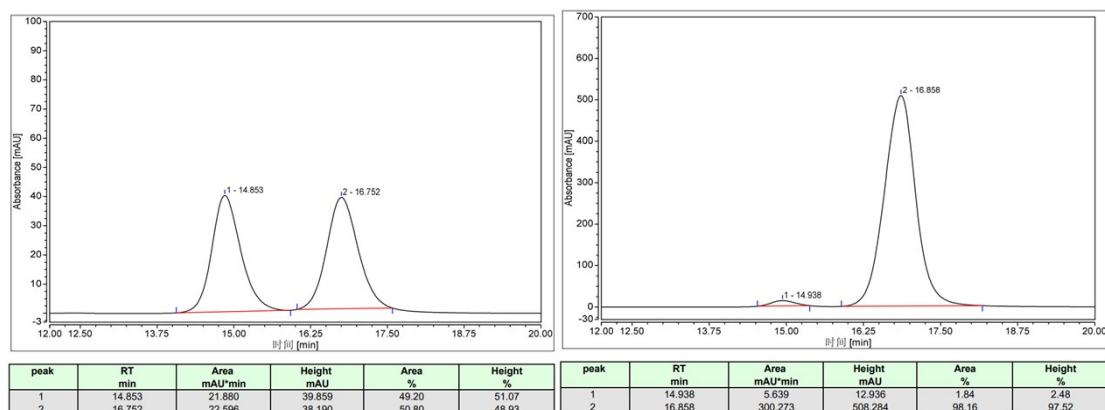

**(3*aS*,4*R*,5*R*,7*S*,7*aR*)-2-(2-(furan-3-yl)-6-methylphenyl)-5-(1-(isoquinolin-1-yl)naphthalen-2-yl)hexahydro-1*H*-4,7-methanoisoindole-1,3(2*H*)-dione (3*a*)**

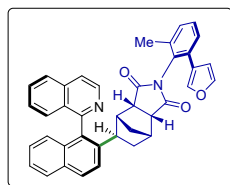

87% yield, white solid, **m.p.** = 101–103 °C.  $^1\text{H}$  NMR (500 MHz,  $\text{CDCl}_3$ )  $\delta$  8.63 (d,  $J = 5.8$  Hz, 1H), 7.99 - 7.97 (m, 1H), 7.94 - 7.92 (m, 1H), 7.86 - 7.84 (m, 1H), 7.75 - 7.73 (m, 1H), 7.68 - 7.63 (m, 2H), 7.38 - 7.32 (m, 2H), 7.30 - 7.26 (m, 3H), 7.21 - 7.19 (m, 2H), 7.15 - 7.12 (m, 2H), 6.66 - 6.65 (m, 1H), 6.16 - 6.15 (m, 1H), 3.23 - 3.20 (m, 1H), 2.95 - 2.89 (m, 2H), 2.80 - 2.77 (m, 1H), 2.71 - 2.70 (m, 1H), 2.30 - 2.26 (m, 1H), 2.24 - 2.22 (m, 1H), 1.83 - 1.79 (m, 1H), 1.76 (s, 3H), 1.54 - 1.51 (m, 1H).  $^{13}\text{C}$  NMR (126 MHz,  $\text{CDCl}_3$ )  $\delta$  177.1, 175.6, 159.7, 142.8, 142.6, 140.3, 139.6, 136.8, 135.8, 133.2, 132.0, 130.4, 130.1, 129.9, 129.4, 128.9, 128.7, 128.3, 127.7, 127.5, 127.3, 127.0, 126.5, 126.0, 125.6, 124.0, 123.1, 120.8, 110.5, 49.2, 49.1, 45.6, 40.1, 39.6, 39.3, 33.7, 18.2.

**HRMS (ESI):** Calculated for  $[\text{C}_{39}\text{H}_{31}\text{N}_2\text{O}_3, \text{M}+\text{H}]^+$ : 575.2329; Found: 575.2335.

**Optical Rotation:**  $[\alpha]_D^{25} = -80.4^\circ$  ( $c = 1.0, \text{CHCl}_3$ ).

**IR** (neat,  $\text{cm}^{-1}$ ) = 2921, 2349, 1705, 1462, 1364, 1175, 1259, 1175, 1086, 1019, 798, 747, 673, 629, 600.

**HPLC:** Daicel Chiralpak IC Column ( $n$ -Hexane/ $i$ -PrOH = 70 : 30, 1.0 mL/min), 30 °C, 254 nm,  $R_t = 16.633$  min (major) and 13.453 min (minor). 96% ee.

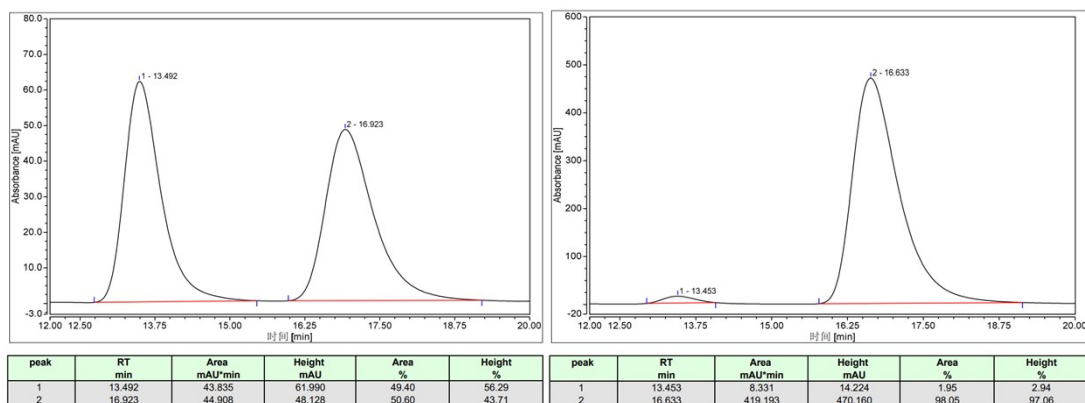

**(3*aS*,4*R*,5*R*,7*S*,7*aR*)-5-(1-(isoquinolin-1-yl)naphthalen-2-yl)-2-(2-methyl-6-(thiophen-3-yl)phenyl)hexahydro-1*H*-4,7-methanoisindole-1,3(2*H*)-dione (3*ap*)**

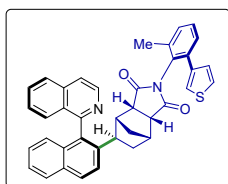

60% yield, white solid, **m.p.** = 117–119 °C. **<sup>1</sup>H NMR** (500 MHz, CDCl<sub>3</sub>) δ 8.65 (d, *J* = 5.8 Hz, 1H), 7.98 - 7.93 (m, 2H), 7.85 - 7.84 (m, 1H), 7.76 - 7.75 (m, 1H), 7.67 - 7.64 (m, 2H), 7.37 - 7.32 (m, 2H), 7.30 - 7.27 (m, 2H), 7.21 - 7.20 (m, 1H), 7.17 - 7.12 (m, 3H), 6.954 - 6.946 (m, 1H), 6.80 - 6.79 (m, 1H), 6.65 - 6.63 (m, 1H), 3.21 - 3.18 (m, 1H), 2.86 - 2.84 (m, 1H), 2.77 - 2.71 (m, 2H), 2.68 - 2.65 (m, 1H), 2.27 - 2.18 (m, 2H), 1.78 - 1.74 (m, 1H), 1.71 (s, 3H), 1.51 - 1.48 (m, 1H). **<sup>13</sup>C NMR** (126 MHz, CDCl<sub>3</sub>) δ 177.1, 175.7, 159.7, 142.6, 140.3, 139.1, 136.8, 136.6, 136.1, 135.8, 133.2, 132.0, 130.4, 130.1, 129.9, 129.2, 128.8, 128.7, 128.2, 128.0, 127.7, 127.5, 127.3, 127.0, 126.4, 125.9, 125.5, 125.3, 124.0, 122.6, 120.7, 49.1, 49.0, 45.3, 40.1, 39.6, 39.2, 33.8, 18.1.

**HRMS (ESI):** Calculated for [C<sub>39</sub>H<sub>31</sub>N<sub>2</sub>O<sub>2</sub>S, M+H]<sup>+</sup>: 591.2101; Found: 591.2104.

**Optical Rotation:** [α]<sub>D</sub><sup>25</sup> = -52.1° (c = 1.0, CHCl<sub>3</sub>).

**IR** (neat, cm<sup>-1</sup>) = 2362, 2921, 2349, 1706, 1463, 1365, 1259, 1178, 1083, 1015, 780, 748, 673, 659, 630, 604.

**HPLC:** Daicel Chiralpak IA Column (*n*-Hexane/*i*-PrOH = 70 : 30, 1.0 mL/min), 30 °C, 254 nm, *R*<sub>t</sub> = 15.045 min (major) and 12.297 min (minor). 92% ee.

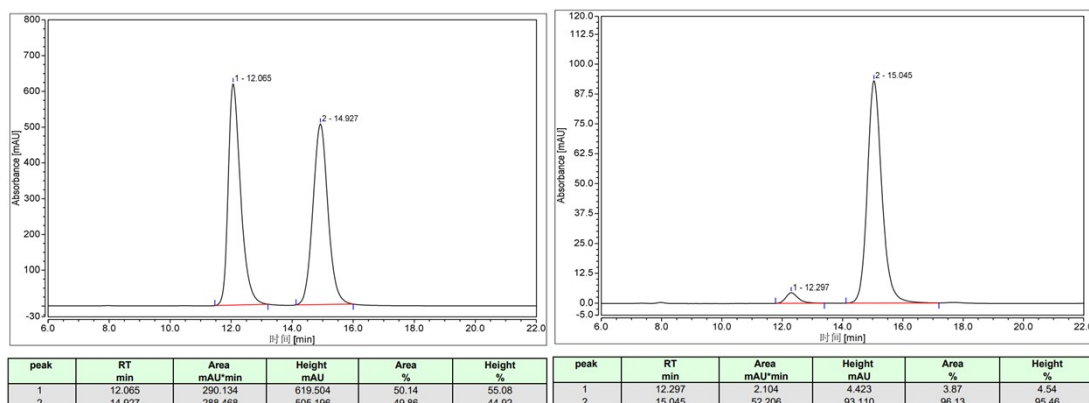

**(3aS,4R,5R,7S,7aR)-2-(2-(*tert*-butyl)phenyl)-5-(1-(isoquinolin-1-yl)-4-methylnaphthalen-2-yl)hexahydro-1H-4,7-methanoisoindole-1,3(2H)-dione (3ba)**

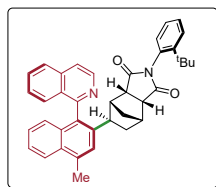

75% yield, white solid, **m.p.** = 262–264 °C. **<sup>1</sup>H NMR** (500 MHz, CDCl<sub>3</sub>) δ 8.68 (d, *J* = 5.7 Hz, 1H), 8.03 - 8.01 (m, 1H), 7.98 - 7.96 (m, 1H), 7.77 - 7.76 (m, 1H), 7.66 - 7.62 (m, 1H), 7.51 (s, 1H), 7.46 - 7.40 (m, 2H), 7.34 - 7.28 (m, 3H), 7.18 - 7.15 (m, 1H), 7.11 - 7.08 (m, 1H), 6.74 - 6.72 (m, 1H), 5.38 - 5.36 (m, 1H), 3.15 - 3.11 (m, 3H), 2.97 - 2.94 (m, 1H), 2.88 - 2.86 (m, 1H), 2.82 (s, 3H), 2.31 - 2.28 (m, 1H), 2.05 - 2.00 (m, 1H), 1.76 - 1.74 (m, 1H), 1.68 - 1.65 (m, 1H), 1.15 (s, 9H). **<sup>13</sup>C NMR** (126 MHz, CDCl<sub>3</sub>) δ 178.0, 176.9, 160.2, 147.6, 142.8, 140.2, 136.4, 135.1, 133.8, 133.4, 131.2, 130.7, 130.4, 130.0, 129.3, 128.63, 128.57, 127.8, 127.2, 127.0, 126.9, 126.4, 126.1, 125.3, 124.0, 123.9, 120.3, 49.0, 48.7, 44.3, 41.4, 39.5, 39.3, 36.1, 35.6, 31.6, 20.1.

**HRMS (ESI):** Calculated for [C<sub>39</sub>H<sub>37</sub>N<sub>2</sub>O<sub>2</sub>, M+H]<sup>+</sup>: 565.2850; Found: 565.2855.

**Optical Rotation:** [ $\alpha$ ]<sub>D</sub><sup>25</sup> = -132.0° (c = 1.0, CHCl<sub>3</sub>).

**IR** (neat, cm<sup>-1</sup>) = 2962, 2365, 2155, 2012, 1706, 1443, 1369, 1259, 1166, 1085, 1017, 798, 754, 691, 603.

**HPLC:** Daicel Chiralpak IA Column (*n*-Hexane/*i*-PrOH = 70 : 30, 1.0 mL/min), 30 °C, 254 nm, *R*<sub>t</sub> = 8.743 min (major) and 13.748 min (minor). 97% ee.

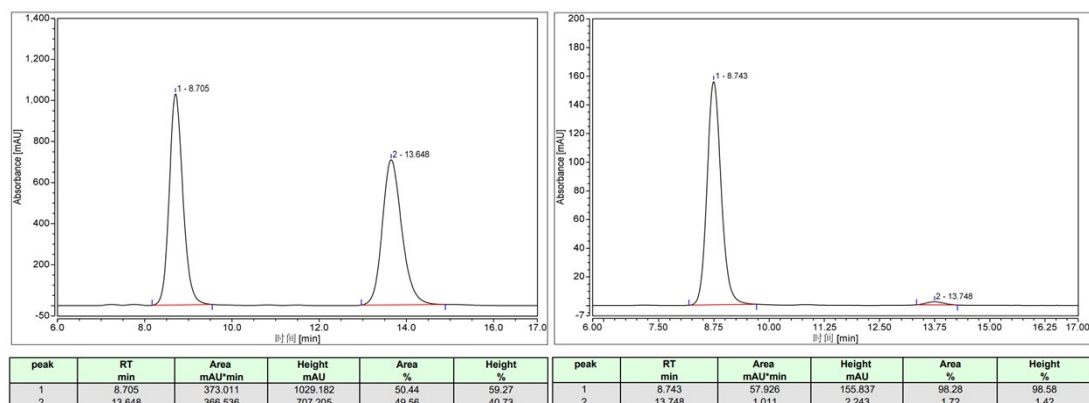

**(3aS,4R,5R,7S,7aR)-5-(4-bromo-1-(isoquinolin-1-yl)naphthalen-2-yl)-2-(2-(*tert*-butyl)phenyl)hexahydro-1H-4,7-methanoisoindole-1,3(2H)-dione (3ca)**

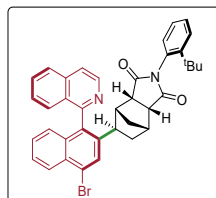

95% yield, white solid, **m.p.** = 275–277 °C. **<sup>1</sup>H NMR** (500 MHz, CDCl<sub>3</sub>) δ 8.68 (d, *J* = 5.8 Hz, 1H), 8.28 - 8.26 (m, 1H), 7.99 - 7.97 (m, 2H), 7.80 - 7.79 (m, 1H), 7.67 - 7.63 (m, 1H), 7.50 - 7.44 (m, 2H), 7.36 - 7.29 (m, 3H), 7.22 - 7.19 (m, 1H), 7.10 - 7.07 (m, 1H), 6.73 - 6.72 (m, 1H), 5.33 - 5.32 (m, 1H), 3.17 - 3.14 (m, 2H), 3.09 - 3.08 (m, 1H), 2.97 - 2.94 (m, 1H), 2.88 - 2.87 (m, 1H), 2.25 - 2.23 (m, 1H), 2.02 - 1.97 (m, 1H),



1.77 - 1.74 (m, 1H), 1.67 - 1.63 (m, 1H), 1.15 (s, 9H).  $^{13}\text{C}$  NMR (126 MHz,  $\text{CDCl}_3$ )  $\delta$  177.8, 176.7, 158.9, 147.7, 142.8, 141.6, 136.4, 135.6, 134.4, 130.9, 130.7, 130.3, 130.0, 129.3, 128.7, 128.3, 128.1, 127.4, 127.3, 127.15, 127.13, 127.0, 126.5, 126.3, 124.0, 120.7, 48.9, 48.6, 44.2, 41.3, 39.5, 39.3, 36.2, 35.6, 31.6.

**HRMS (ESI):** Calculated for  $[\text{C}_{38}\text{H}_{34}\text{BrN}_2\text{O}_2, \text{M}+\text{H}]^+$ : 629.1798; Found: 629.1803.

**Optical Rotation:**  $[\alpha]^{25}_{\text{D}} = -114.3^\circ$  ( $c = 1.0$ ,  $\text{CHCl}_3$ ).

**IR** (neat,  $\text{cm}^{-1}$ ) = 3871, 3750, 3689, 3675, 2361, 1749, 1699, 1684, 1558, 1541, 1489.

**HPLC:** Daicel Chiralpak IA Column ( $n$ -Hexane/ $i$ -PrOH = 70 : 30, 1.0 mL/min), 30 °C, 254 nm,  $R_t = 8.903$  min (major) and 11.773 min (minor). 94% ee.

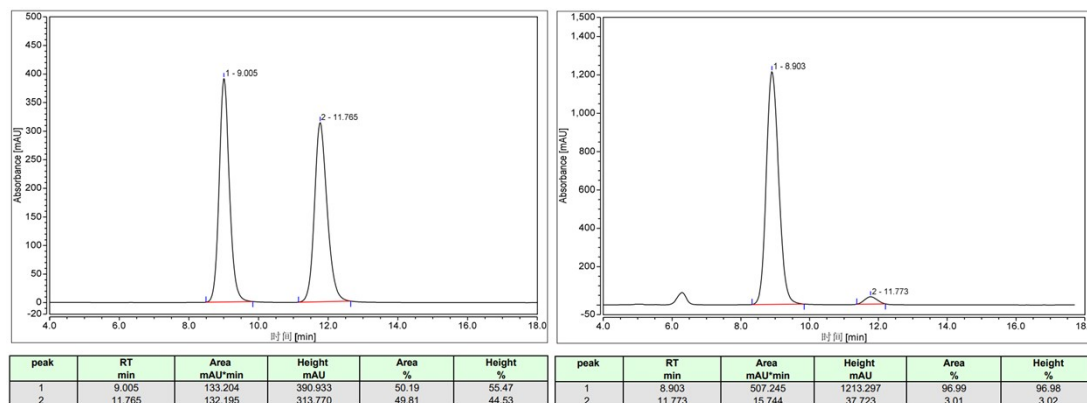

**(3*aS*,4*R*,5*R*,7*S*,7*aR*)-2-(2-(*tert*-butyl)phenyl)-5-(1-(3-methylpyridin-2-yl)naphthalen-2-yl)hexahydro-1*H*-4,7-methanoisoindole-1,3(2*H*)-dione (3*da*)**

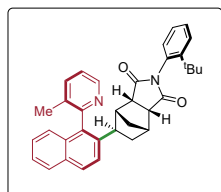

99% yield, white solid, **m.p.** = 285–287 °C.  $^1\text{H}$  NMR (500 MHz,  $\text{CDCl}_3$ )  $\delta$  8.63 (d,  $J = 6.5$  Hz, 1H), 7.90 - 7.89 (m, 1H), 7.84 - 7.82 (m, 1H), 7.72 - 7.70 (m, 1H), 7.61 - 7.60 (m, 1H), 7.55 - 7.53 (m, 1H), 7.41 - 7.38 (m, 2H), 7.35 - 7.33 (m, 1H), 7.30 - 7.26 (m, 2H), 6.89 - 6.87 (m, 1H), 5.91 - 5.89 (m, 1H), 3.33 - 3.30 (m, 1H), 3.26 - 3.22 (m, 1H), 3.14 - 3.13 (m, 1H), 2.98 - 2.95 (m, 1H), 2.92 - 2.90 (m, 1H), 2.34 - 2.32 (m, 1H), 1.93 (s, 3H), 1.90 - 1.89 (m, 1H), 1.82 - 1.77 (m, 2H), 1.25 (s, 9H).  $^{13}\text{C}$  NMR (126 MHz,  $\text{CDCl}_3$ )  $\delta$  178.0, 177.7, 157.8, 147.9, 147.6, 139.7, 138.1, 136.5, 133.4, 132.22, 132.21, 131.0, 130.3, 129.6, 128.8, 128.6, 127.9, 127.2, 126.5, 125.5, 125.1, 123.1, 122.7, 49.4, 48.7, 44.5, 41.7, 39.6, 39.2, 36.2, 35.6, 31.7, 18.5.

**HRMS (ESI):** Calculated for  $[\text{C}_{35}\text{H}_{35}\text{N}_2\text{O}_2, \text{M}+\text{H}]^+$ : 515.2693; Found: 515.2704.

**Optical Rotation:**  $[\alpha]^{25}_{\text{D}} = -58.5^\circ$  ( $c = 1.0$ ,  $\text{CHCl}_3$ ).

**IR** (neat,  $\text{cm}^{-1}$ ) = 2922, 1710, 1442, 1361, 1259, 1160, 1018, 808, 749, 621, 590.

**HPLC:** Daicel Chiralpak IC Column ( $n$ -Hexane/ $i$ -PrOH = 70 : 30, 1.0 mL/min), 30 °C, 254 nm,  $R_t = 10.007$  min (major) and 7.847 min (minor). 97% ee.

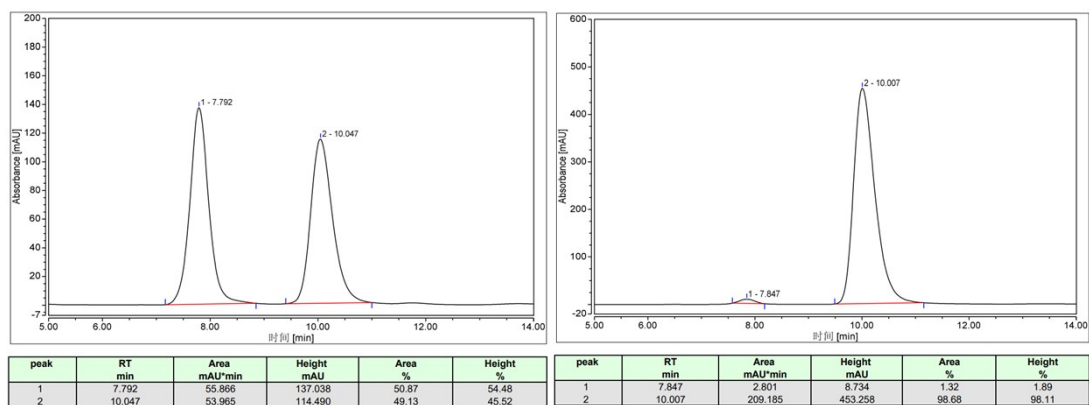

**(3a*S*,4*R*,5*R*,7*S*,7*aR*)-2-(2-(*tert*-butyl)phenyl)-5-(4-methyl-1-(3-methylpyridin-2-yl)naphthalen-2-yl)hexahydro-1*H*-4,7-methanoisoindole-1,3(2*H*)-dione (3ea)**

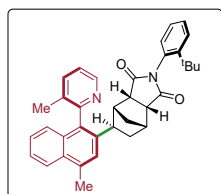

85% yield, white solid, **m.p.** = 256–258 °C. **<sup>1</sup>H NMR** (500 MHz, CDCl<sub>3</sub>) δ 8.62 (d, *J* = 6.7 Hz, 1H), 8.00 - 7.98 (m, 1H), 7.71 - 7.69 (m, 1H), 7.55 - 7.53 (m, 1H), 7.45 - 7.42 (m, 2H), 7.40 - 7.37 (m, 1H), 7.34 - 7.32 (m, 1H), 7.28 - 7.23 (m, 2H), 6.89 - 6.87 (m, 1H), 5.91 - 5.89 (m, 1H), 3.33 - 3.30 (m, 1H), 3.26 - 3.22 (m, 1H), 3.15 - 3.13 (m, 1H), 2.95 - 2.90 (m, 2H), 2.76 (s, 3H), 2.37 - 2.35 (m, 1H), 1.92 (s, 3H), 1.91 - 1.88 (m, 1H), 1.84 - 1.74 (m, 2H), 1.24 (s, 9H). **<sup>13</sup>C NMR** (126 MHz, CDCl<sub>3</sub>) δ 178.0, 177.7, 158.1, 147.9, 147.5, 139.2, 138.0, 134.9, 134.7, 133.6, 132.3, 131.4, 131.0, 130.3, 129.6, 128.8, 127.2, 126.2, 125.7, 125.3, 124.1, 123.9, 122.5, 49.4, 48.7, 44.5, 41.8, 39.6, 39.1, 36.2, 35.6, 31.7, 20.0, 18.6.

**HRMS (ESI):** Calculated for [C<sub>36</sub>H<sub>37</sub>N<sub>2</sub>O<sub>2</sub>, M+H]<sup>+</sup>: 529.2850; Found: 529.2854.

**Optical Rotation:** [α]<sub>D</sub><sup>25</sup> = -75.5° (c = 1.0, CHCl<sub>3</sub>).

**IR** (neat, cm<sup>-1</sup>) = 1709, 1443, 1369, 1260, 1167, 1084, 801, 757, 728, 619, 597.

**HPLC:** Daicel Chiralpak AD-H Column (*n*-Hexane/*i*-PrOH = 90 : 10, 1.0 mL/min), 30 °C, 254 nm, *R*<sub>t</sub> = 20.220 min (major) and 24.313 min (minor). 97% ee.

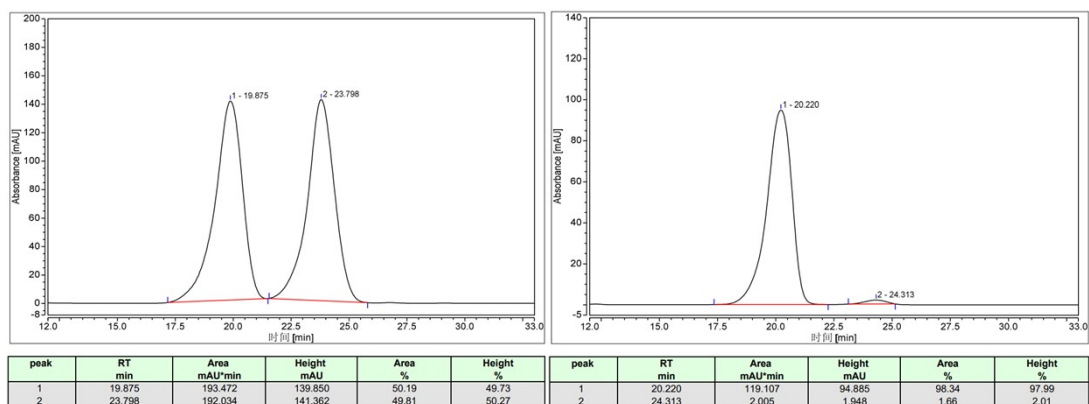

**(3a*S*,4*R*,5*R*,7*S*,7*aR*)-5-(4-bromo-1-(3-methylpyridin-2-yl)naphthalen-2-yl)-2-(2-(*tert*-butyl)phenyl)hexahydro-1*H*-4,7-methanoisindole-1,3(2*H*)-dione (3fa)**

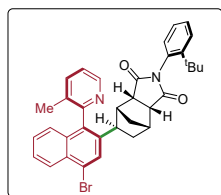

99% yield, white solid, **m.p.** = 242–244 °C. **<sup>1</sup>H NMR** (500 MHz, CDCl<sub>3</sub>) δ 8.63 (d, *J* = 6.5 Hz, 1H), 8.25 - 8.23 (m, 1H), 7.91 (s, 1H), 7.72 - 7.70 (m, 1H), 7.55 - 7.49 (m, 2H), 7.39 - 7.31 (m, 3H), 7.24 - 7.22 (m, 1H), 6.89 - 6.87 (m, 1H), 5.87 - 5.85 (m, 1H), 3.34 - 3.31 (m, 1H), 3.26 - 3.23 (m, 1H), 3.12 - 3.11 (m, 1H), 2.94 - 2.91 (m, 2H), 2.31 - 2.29 (m, 1H), 1.92 (s, 3H), 1.90 - 1.86 (m, 1H), 1.84 - 1.82 (m, 1H), 1.79 - 1.74 (m, 1H), 1.24 (s, 9H). **<sup>13</sup>C NMR** (126 MHz, CDCl<sub>3</sub>) δ 177.8, 177.6, 157.0, 147.9, 147.7, 140.7, 138.3, 136.6, 133.42, 133.40, 130.9, 130.8, 130.3, 129.6, 128.8, 127.41, 127.39, 127.24, 127.16, 127.0, 125.6, 123.5, 122.9, 49.3, 48.6, 44.4, 41.7, 39.6, 39.1, 36.2, 35.6, 31.7, 18.5.

**HRMS (ESI):** Calculated for [C<sub>35</sub>H<sub>34</sub>BrN<sub>2</sub>O<sub>2</sub>, M+H]<sup>+</sup>: 593.1798; Found: 593.1804.

**Optical Rotation:** [α]<sub>D</sub><sup>25</sup> = -53.4° (c = 1.0, CHCl<sub>3</sub>).

**IR** (neat, cm<sup>-1</sup>) = 2960, 1711, 1442, 1370, 1260, 1168, 1018, 798, 756, 698, 595.

**HPLC:** Daicel Chiralpak AD-H Column (*n*-Hexane/*i*-PrOH = 80 : 20, 1.0 mL/min), 30 °C, 254 nm, *R*<sub>t</sub> = 7.742 min (major) and 9.150 min (minor). 96% ee.

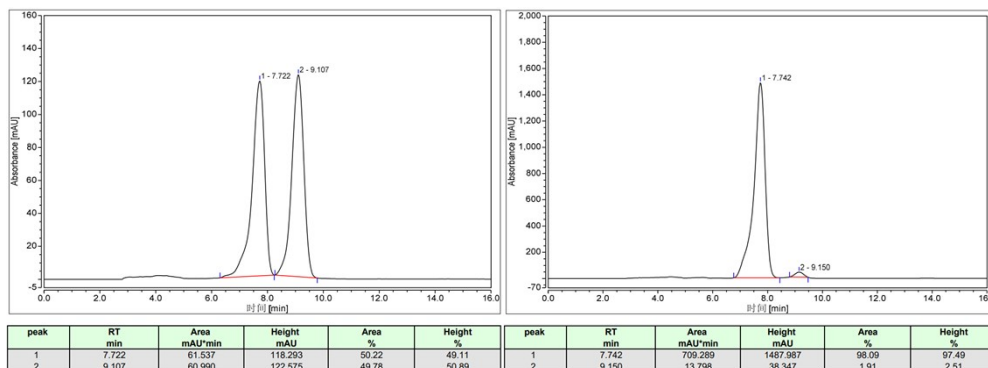

**(3a*S*,4*R*,5*R*,7*S*,7*aR*)-2-(2-(*tert*-butyl)phenyl)-5-(2-(isoquinolin-1-yl)-3-methylphenyl)hexahydro-1*H*-4,7-methanoisindole-1,3(2*H*)-dione (3ga)**

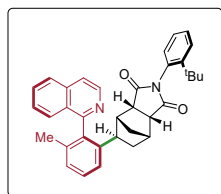

60% yield, white solid, **m.p.** = 104–106 °C. **<sup>1</sup>H NMR** (500 MHz, CDCl<sub>3</sub>) δ 8.60 (d, *J* = 5.8 Hz, 1H), 7.96 - 7.95 (m, 1H), 7.71 - 7.70 (m, 1H), 7.68 - 7.65 (m, 1H), 7.46 - 7.43 (m, 3H), 7.37 - 7.28 (m, 3H), 7.19 - 7.18 (m, 1H), 7.06 - 7.03 (m, 1H), 5.24 - 5.22 (m, 1H), 3.11 - 3.10 (m, 2H), 3.04 - 3.03 (m, 1H), 2.83 - 2.76 (m, 2H), 2.19 - 2.16 (m, 1H), 1.93 - 1.88 (m, 1H), 1.73 (s, 3H), 1.69 - 1.66 (m, 1H), 1.50 - 1.46 (m, 1H), 1.14 (s, 9H). **<sup>13</sup>C NMR** (126 MHz, CDCl<sub>3</sub>) δ 178.0, 177.0, 160.7, 147.6, 143.2, 142.7, 138.6, 137.5, 136.4, 130.7, 130.2, 130.0, 129.2, 128.6, 128.32, 128.26, 127.9, 127.5, 127.1, 127.0, 126.3, 122.6, 120.0, 48.9, 48.6, 44.0,

41.0, 39.6, 39.2, 36.0, 35.6, 31.6, 19.9.

**HRMS (ESI):** Calculated for  $[C_{35}H_{35}N_2O_2, M+H]^+$ : 515.2693; Found: 515.2699.

**Optical Rotation:**  $[\alpha]^{25}_D = -103.2^\circ$  ( $c = 1.0, CHCl_3$ ).

**IR** (neat,  $cm^{-1}$ ) = 2959, 1708, 1582, 1488, 1441, 1175, 973, 875, 826, 783, 753, 726, 687, 618.

**HPLC:** Daicel Chiralpak IA Column (*n*-Hexane/*i*-PrOH = 70 : 30, 1.0 mL/min), 30 °C, 254 nm,  $R_t = 7.502$  min (major) and 9.573 min (minor). 82% ee.

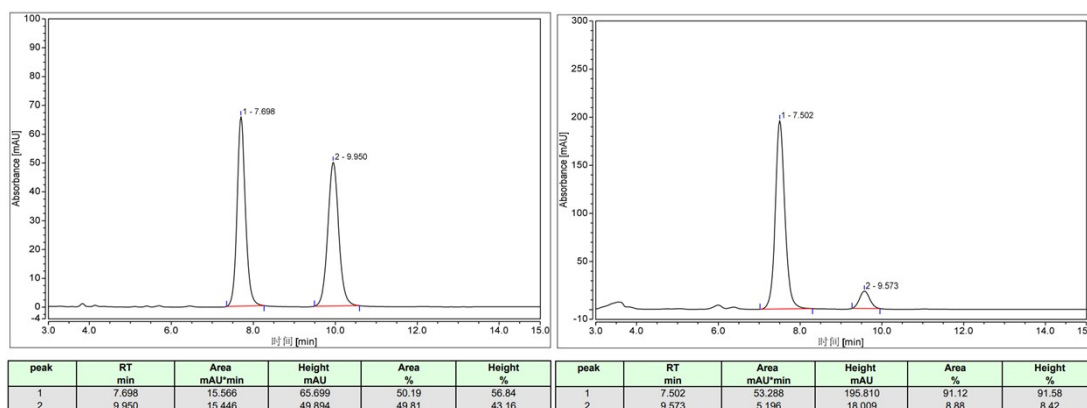

**(3a*S*,4*R*,5*R*,7*S*,7*aR*)-2-(2-(*tert*-butyl)phenyl)-5-(2-(isoquinolin-1-yl)-3,5-dimethylphenyl)hexahydro-1*H*-4,7-methanoisoindole-1,3(2*H*)-dione (3*ha*)**

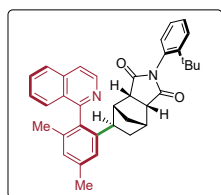

60% yield, white solid, **m.p.** = 118–120 °C. **<sup>1</sup>H NMR** (500 MHz,  $CDCl_3$ )  $\delta$  8.59 (d,  $J = 5.7$  Hz, 1H), 7.95 - 7.93 (m, 1H), 7.69 - 7.68 (m, 1H), 7.67 - 7.64 (m, 1H), 7.49 - 7.47 (m, 1H), 7.45 - 7.42 (m, 2H), 7.29 - 7.28 (m, 1H), 7.11 (s, 1H), 7.05 - 7.01 (m, 2H), 5.24 - 5.22 (m, 1H), 3.11 - 3.10 (m, 2H), 3.03 - 3.02 (m, 1H), 2.82 - 2.81 (m, 1H), 2.77 - 2.74 (m, 1H), 2.42 (s, 3H), 2.19 - 2.17 (m, 1H), 1.92 - 1.88 (m, 1H), 1.70 (s, 3H), 1.68 - 1.66 (m, 1H), 1.50 - 1.45 (m, 1H), 1.14 (s, 9H). **<sup>13</sup>C NMR** (126 MHz,  $CDCl_3$ )  $\delta$  178.0, 177.0, 160.9, 147.6, 143.1, 142.7, 137.7, 137.3, 136.4, 130.6, 130.3, 130.0, 129.2, 128.9, 128.6, 127.8, 127.7, 127.1, 127.0, 126.4, 123.3, 119.9, 48.9, 48.7, 44.0, 41.1, 39.6, 39.1, 36.0, 35.6, 31.6, 21.7, 19.9.

**HRMS (ESI):** Calculated for  $[C_{36}H_{37}N_2O_2, M+H]^+$ : 529.2850; Found: 529.2854.

**Optical Rotation:**  $[\alpha]^{25}_D = -102.7^\circ$  ( $c = 1.0, CHCl_3$ ).

**IR** (neat,  $cm^{-1}$ ) = 2920, 2850, 1708, 1441, 1367, 1173, 826, 753, 727, 691, 617.

**HPLC:** Daicel Chiralpak IA Column (*n*-Hexane/*i*-PrOH = 70 : 30, 1.0 mL/min), 30 °C, 254 nm,  $R_t = 5.905$  min (major) and 7.370 min (minor). 88% ee.

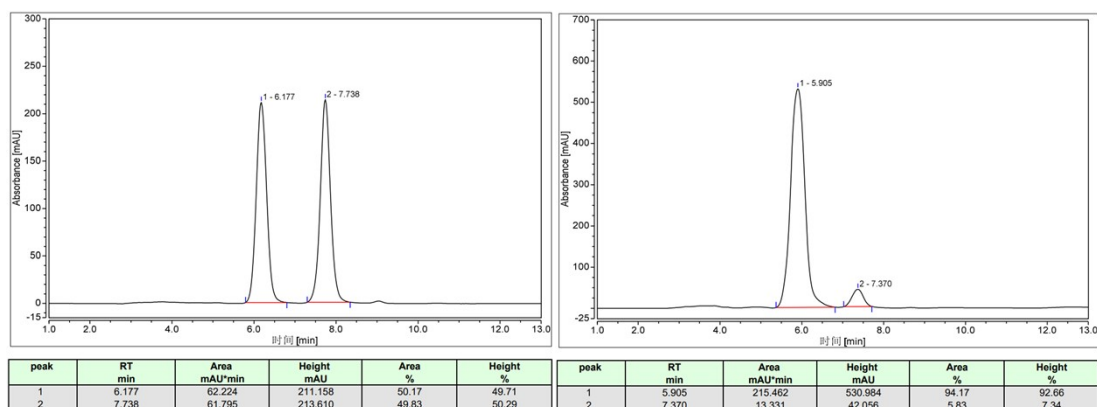

**(3*aS*,4*R*,5*R*,7*S*,7*aR*)-2-(2-(*tert*-butyl)phenyl)-5-(2-(isoquinolin-1-yl)-3,4-dimethylphenyl)hexahydro-1*H*-4,7-methanoisoindole-1,3(2*H*)-dione (3ia)**

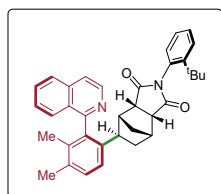

57% yield, white solid, **m.p.** = 133–135 °C. **<sup>1</sup>H NMR** (500 MHz, CDCl<sub>3</sub>) δ 8.59 (d, *J* = 5.8 Hz, 1H), 7.96 - 7.94 (m, 1H), 7.71 - 7.65 (m, 2H), 7.48 - 7.42 (m, 3H), 7.30 - 7.21 (m, 4H), 7.08 - 7.05 (m, 1H), 5.26 - 5.24 (m, 1H), 3.10 - 3.09 (m, 2H), 3.004 - 2.996 (m, 1H), 2.81 - 2.80 (m, 1H), 2.72 - 2.69 (m, 1H), 2.29 (s, 3H), 2.17 - 2.15 (m, 1H), 1.91 - 1.86 (m, 1H), 1.66 - 1.64 (m, 1H), 1.61 (s, 3H), 1.46 - 1.41 (m, 1H), 1.14 (s, 9H). **<sup>13</sup>C NMR** (126 MHz, CDCl<sub>3</sub>) δ 178.1, 177.0, 161.3, 147.6, 142.5, 140.8, 138.4, 136.4, 135.8, 135.0, 130.7, 130.3, 130.0, 129.8, 129.2, 128.6, 127.85, 127.78, 127.1, 127.0, 126.5, 122.3, 120.0, 48.9, 48.7, 44.0, 41.0, 39.6, 39.1, 36.0, 35.6, 31.6, 20.1, 16.6.

**HRMS (ESI):** Calculated for [C<sub>36</sub>H<sub>37</sub>N<sub>2</sub>O<sub>2</sub>, M+H]<sup>+</sup>: 529.2850; Found: 529.2852.

**Optical Rotation:** [α]<sub>D</sub><sup>25</sup> = -117.2° (c = 1.0, CHCl<sub>3</sub>).

**IR** (neat, cm<sup>-1</sup>) = 2967, 2332, 1708, 1440, 1367, 1175, 825, 753, 688, 618.

**HPLC:** Daicel Chiralpak IA Column (*n*-Hexane/*i*-PrOH = 70 : 30, 1.0 mL/min), 30 °C, 254 nm, *R*<sub>t</sub> = 7.777 min (major) and 11.117 min (minor). 84% ee.

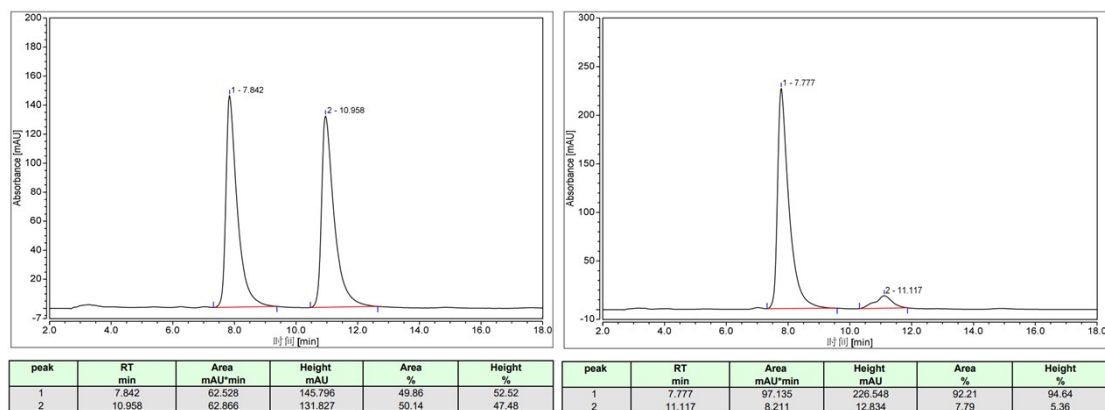

**(3a*S*,4*R*,5*R*,7*S*,7a*R*)-5-(1-(benzo[*h*]isoquinolin-1-yl)naphthalen-2-yl)-2-(2-(*tert*-butyl)phenyl)hexahydro-1*H*-4,7-methanoisindole-1,3(2*H*)-dione (3ja)**

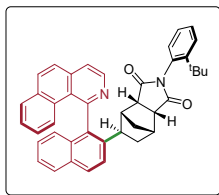

69% yield, white solid, **m.p.** = 108–110 °C. **<sup>1</sup>H NMR** (500 MHz, CDCl<sub>3</sub>) δ 8.82 (d, *J* = 5.2 Hz, 1H), 8.07 - 8.05 (m, 1H), 7.97 - 7.95 (m, 1H), 7.88 - 7.76 (m, 6H), 7.45 - 7.43 (m, 1H), 7.36 - 7.29 (m, 4H), 7.12 - 7.08 (m, 1H), 7.07 - 7.03 (m, 1H), 7.00 - 6.97 (m, 1H), 6.71 - 6.69 (m, 1H), 5.66 - 5.64 (m, 1H), 3.15 - 3.09 (m, 2H), 2.95 - 2.89 (m, 3H), 2.33 - 2.30 (m, 1H), 2.18 - 2.15 (m, 1H), 1.81 - 1.76 (m, 1H), 1.68 - 1.66 (m, 1H), 1.11 (s, 9H). **<sup>13</sup>C NMR** (126 MHz, CDCl<sub>3</sub>) δ 178.1, 176.5, 156.7, 147.6, 144.3, 140.3, 138.9, 138.4, 133.3, 132.68, 132.66, 131.9, 130.6, 130.1, 129.3, 129.2, 128.8, 128.6, 127.8, 127.3, 127.1, 126.9, 126.6, 126.0, 125.9, 125.8, 125.6, 125.3, 124.2, 121.8, 49.0, 48.6, 44.5, 41.1, 39.5, 39.3, 35.6, 35.2, 31.6.

**HRMS (ESI):** Calculated for [C<sub>42</sub>H<sub>37</sub>N<sub>2</sub>O<sub>2</sub>, M+H]<sup>+</sup>: 601.2850; Found: 601.2858.

**Optical Rotation:** [α]<sub>D</sub><sup>25</sup> = -52.8° (c = 1.0, CHCl<sub>3</sub>).

**IR** (neat, cm<sup>-1</sup>) = 2954, 2922, 2853, 1708, 1461, 1375, 1260, 1169, 1084, 1021, 789, 749.

**HPLC:** Daicel Chiralpak IA Column (*n*-Hexane/*i*-PrOH = 70 : 30, 1.0 mL/min), 30 °C, 254 nm, *R*<sub>t</sub> = 10.013 min (major) and 7.553 min (minor). 90% ee.

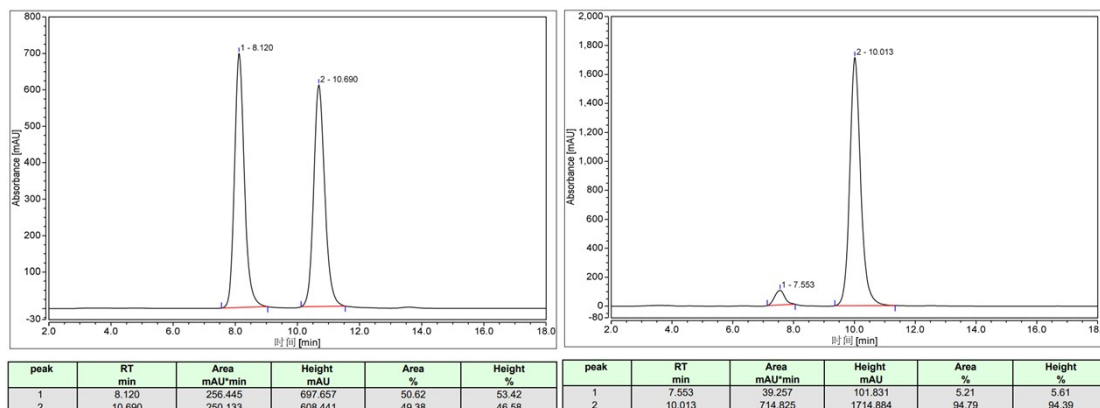

**(3a*S*,4*R*,5*R*,7*S*,7a*R*)-5-(1-(benzo[*h*]isoquinolin-1-yl)-4-methylnaphthalen-2-yl)-2-(2-(*tert*-butyl)phenyl)hexahydro-1*H*-4,7-methanoisindole-1,3(2*H*)-dione (3ka)**

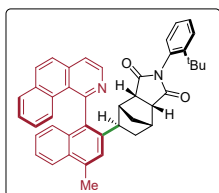

98% yield, white solid, **m.p.** = 248–250 °C. **<sup>1</sup>H NMR** (500 MHz, CDCl<sub>3</sub>) δ 8.73 (d, *J* = 5.2 Hz, 1H), 7.95 - 7.94 (m, 1H), 7.88 - 7.86 (m, 1H), 7.75 - 7.74 (m, 1H), 7.71 - 7.69 (m, 2H), 7.51 (s, 1H), 7.37 - 7.27 (m, 4H), 7.24 - 7.21 (m, 1H), 7.04 - 6.91 (m, 3H), 6.65 - 6.64 (m, 1H), 5.58 - 5.56 (m, 1H), 3.04 - 3.01 (m, 2H), 2.87 - 2.82 (m, 3H), 2.80 (s, 3H), 2.27 - 2.24 (m, 1H), 2.11 - 2.07 (m, 1H), 1.72 - 1.67 (m, 1H), 1.60 - 1.58 (m, 1H), 1.04 (s, 9H). **<sup>13</sup>C NMR** (126 MHz, CDCl<sub>3</sub>) δ 178.1, 176.4, 157.0, 147.6, 144.3, 138.7, 138.4, 135.1, 133.2,

132.6, 132.0, 131.9, 130.6, 130.1, 129.3, 129.23, 129.15, 128.6, 127.3, 127.1, 126.8, 126.3, 126.2, 125.92, 125.90, 125.7, 125.6, 125.0, 124.0, 121.7, 49.1, 48.6, 44.5, 41.2, 39.4, 39.3, 35.6, 35.1, 31.6, 20.2.

**HRMS (ESI):** Calculated for  $[C_{43}H_{39}N_2O_2, M+H]^+$ : 615.3006; Found: 615.3011.

**Optical Rotation:**  $[\alpha]^{25}_D = -64.2^\circ$  ( $c = 1.0, CHCl_3$ ).

**IR** (neat,  $cm^{-1}$ ) = 2922, 1710, 1442, 1364, 1259, 1169, 1017, 858, 795, 748, 604.

**HPLC:** Daicel Chiralpak IC Column (*n*-Hexane/*i*-PrOH = 90 : 10, 1.0 mL/min), 30 °C, 254 nm,  $R_t = 31.112$  min (major) and 39.618 min (minor). 92% ee.

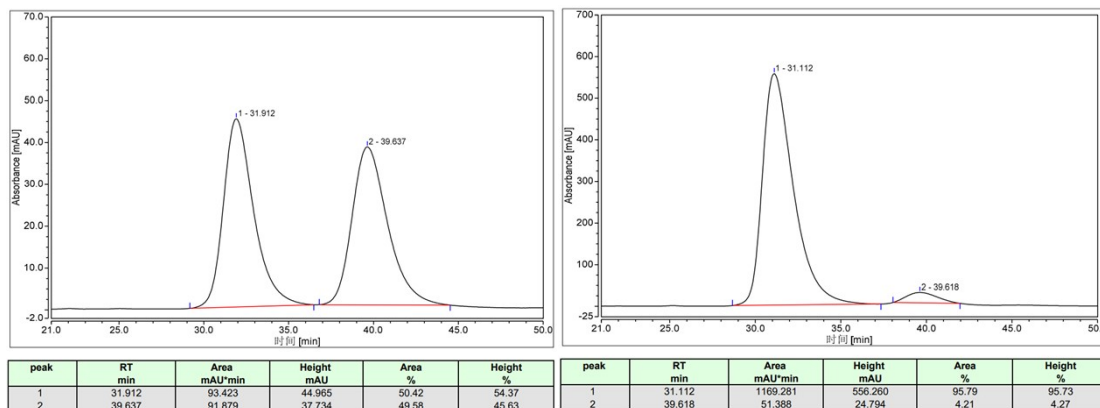

**(3a*S*,4*R*,5*R*,7*S*,7a*R*)-5-(1-(benzo[*h*]isoquinolin-1-yl)-4-bromonaphthalen-2-yl)-2-(2-(*tert*-butyl)phenyl)hexahydro-1*H*-4,7-methanoisindole-1,3(2*H*)-dione (3*la*)**

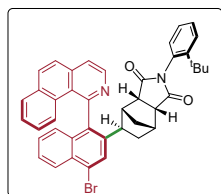

73% yield, white solid, **m.p.** = 271–273 °C. **<sup>1</sup>H NMR** (500 MHz,  $CDCl_3$ )  $\delta$  8.80 (d,  $J = 5.2$  Hz, 1H), 8.28 - 8.26 (m, 1H), 8.070 - 8.067 (m, 1H), 7.95 - 7.93 (m, 1H), 7.82 - 7.77 (m, 3H), 7.45 - 7.42 (m, 2H), 7.38 - 7.35 (m, 2H), 7.31 - 7.28 (m, 1H), 7.10 - 7.03 (m, 3H), 6.72 - 6.71 (m, 1H), 5.61 - 5.59 (m, 1H), 3.12 - 3.08 (m, 2H), 2.96 - 2.88 (m, 3H), 2.28 - 2.26 (m, 1H), 2.14 - 2.10 (m, 1H), 1.79 - 1.74 (m, 1H), 1.69 - 1.66 (m, 1H), 1.10 (s, 9H). **<sup>13</sup>C NMR** (126 MHz,  $CDCl_3$ )  $\delta$  177.9, 176.3, 155.7, 147.7, 144.4, 140.5, 139.9, 138.4, 133.3, 133.0, 132.8, 131.3, 130.5, 130.0, 129.4, 129.3, 129.0, 128.7, 128.6, 127.6, 127.5, 127.3, 127.2, 127.1, 126.0, 125.9, 125.8, 125.5, 123.7, 122.0, 49.0, 48.5, 44.4, 41.1, 39.4, 39.3, 35.6, 35.2, 31.6.

**HRMS (ESI):** Calculated for  $[C_{42}H_{36}BrN_2O_2, M+H]^+$ : 679.1955; Found: 679.1965.

**Optical Rotation:**  $[\alpha]^{25}_D = -79.3^\circ$  ( $c = 1.0, CHCl_3$ ).

**IR** (neat,  $cm^{-1}$ ) = 2919, 2849, 1710, 1645, 1364, 1260, 1017, 856, 801, 747, 605.

**HPLC:** Daicel Chiralpak IA Column (*n*-Hexane/*i*-PrOH = 80 : 20, 1.0 mL/min), 30 °C, 254 nm,  $R_t = 9.132$  min (major) and 10.660 min (minor). 92% ee.

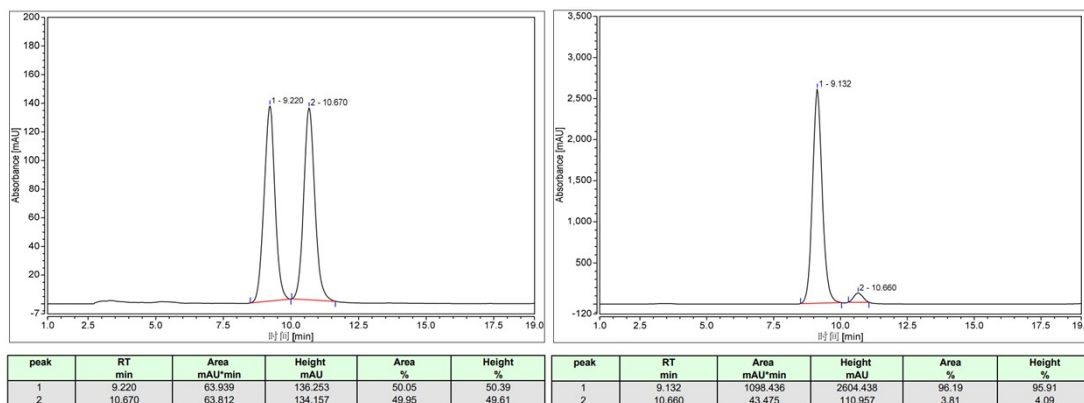

**(3a*S*,4*R*,5*R*,7*S*,7*aR*)-5-(5-(benzo[*h*]isoquinolin-1-yl)-1,2-dihydroacenaphthylen-4-yl)-2-(2-(*tert*-butyl)phenyl)hexahydro-1*H*-4,7-methanoisindole-1,3(2*H*)-dione (3ma)**

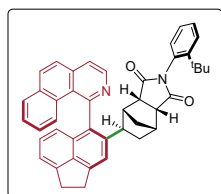

99% yield, white solid, **m.p.** = 136–138 °C. **<sup>1</sup>H NMR** (500 MHz, CDCl<sub>3</sub>) δ 8.72 (d, *J* = 5.2 Hz, 1H), 7.88 - 7.86 (m, 1H), 7.76 - 7.74 (m, 1H), 7.71 - 7.69 (m, 2H), 7.51 - 7.48 (m, 2H), 7.36 - 7.34 (m, 1H), 7.30 - 7.27 (m, 1H), 7.22 - 7.19 (m, 1H), 7.07 - 7.05 (m, 1H), 6.99 - 6.92 (m, 3H), 6.30 - 6.28 (m, 1H), 5.55 - 5.54 (m, 1H), 3.52 - 3.36 (m, 4H), 3.21 - 3.18 (m, 1H), 3.06 - 3.03 (m, 1H), 2.92 - 2.89 (m, 2H), 2.85 - 2.83 (m, 1H), 2.30 - 2.28 (m, 1H), 2.14 - 2.09 (m, 1H), 1.79 - 1.74 (m, 1H), 1.62 - 1.60 (m, 1H), 1.04 (s, 9H). **<sup>13</sup>C NMR** (126 MHz, CDCl<sub>3</sub>) δ 177.1, 175.5, 155.7, 146.5, 145.6, 144.6, 143.3, 139.8, 137.3, 137.2, 135.2, 132.2, 131.5, 129.5, 129.0, 128.9, 128.2, 128.0, 127.5, 127.4, 126.2, 126.1, 125.7, 125.0, 124.8, 124.7, 120.4, 119.3, 118.2, 116.6, 48.1, 47.6, 43.7, 40.2, 38.9, 38.3, 34.6, 34.5, 30.5, 29.6, 29.5.

**HRMS (ESI):** Calculated for [C<sub>44</sub>H<sub>39</sub>N<sub>2</sub>O<sub>2</sub>, M+H]<sup>+</sup>: 627.3006; Found: 627.3019.

**Optical Rotation:** [α]<sub>D</sub><sup>25</sup> = -64.5° (c = 1.0, CHCl<sub>3</sub>).

**IR** (neat, cm<sup>-1</sup>) = 2923, 2342, 2173, 1978, 1453, 1259, 1066, 796.

**HPLC:** Daicel Chiralpak AD-H Column (*n*-Hexane/*i*-PrOH = 70 : 30, 1.0 mL/min), 30 °C, 254 nm, *R*<sub>t</sub> = 5.335 min (major) and 6.695 min (minor). 92% ee.

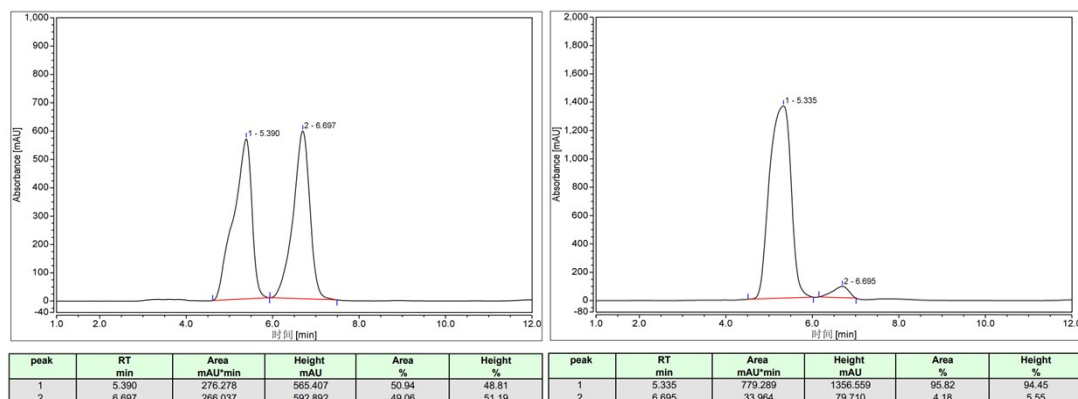



## 2. Construction of C–C and N–N atropisomers 5:

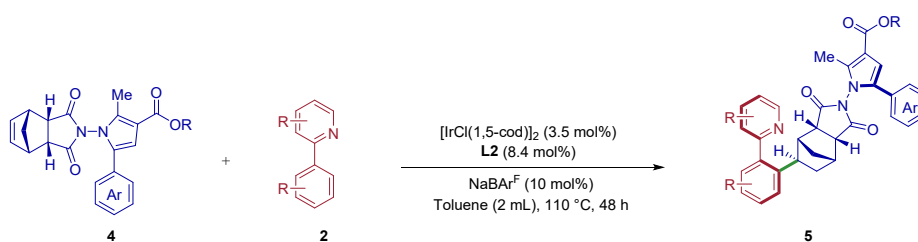

**General procedure F:** To an oven-dried 10 mL Schlenk tube containing a stirring bar was charged with  $[\text{IrCl}(1,5\text{-cod})]_2$  (0.0035 mmol, 2.4 mg), **L2** (0.0084 mmol, 5.7 mg) and 1.0 mL dry toluene in a nitrogen-filled glove-box, the mixture was stirred for 10 min at room temperature. Then corresponding substrate **4** (0.1 mmol, 1.0 equiv.), corresponding substrate **2** (0.12 mmol, 1.2 equiv.),  $\text{NaBAR}^{\text{F}}$  (0.01 mmol, 8.9 mg) and another 1.0 mL dry toluene were added sequentially. The mixture was stirred at 110 °C for 48 hours, concentrated to dryness and the crude mixture was purified by flash column chromatography on silica gel using a mixture of Hexane/EtOAc (3/1, v/v) as eluent to obtain the desired product.

**methyl 1-((3aS,4R,5R,7S,7aR)-5-(1-(isoquinolin-1-yl)naphthalen-2-yl)-1,3-dioxooctahydro-2H-4,7-methanoisindol-2-yl)-2-methyl-5-phenyl-1H-pyrrole-3-carboxylate (5a)**

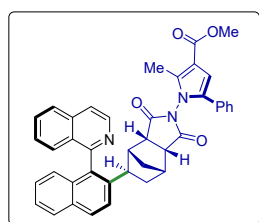

99% yield, white solid, **m.p.** = 121–123 °C.  $^1\text{H NMR}$  (500 MHz,  $\text{CDCl}_3$ )  $\delta$  8.67 (d,  $J$  = 5.8 Hz, 1H), 8.02 - 7.98 (m, 2H), 7.87 - 7.82 (m, 2H), 7.72 - 7.69 (m, 1H), 7.64 - 7.62 (m, 1H), 7.40 - 7.35 (m, 2H), 7.29 - 7.27 (m, 1H), 7.21 - 7.15 (m, 4H), 7.06 - 7.03 (m, 2H), 6.69 - 6.67 (m, 1H), 6.62 (s, 1H), 3.87 (s, 3H), 3.14 - 3.11 (m, 1H), 2.93 - 2.91 (m, 1H), 2.88 - 2.84 (m, 1H), 2.73 - 2.69 (m, 2H), 2.32 - 2.24 (m, 2H), 1.97 (s, 3H), 1.75 - 1.70 (m, 1H), 1.49 - 1.47 (m, 1H).  $^{13}\text{C NMR}$  (126 MHz,  $\text{CDCl}_3$ )  $\delta$  173.3, 171.9, 165.2, 159.4, 139.5, 136.9, 136.8, 133.1, 132.9, 132.1, 130.5, 130.1, 128.9, 128.8, 128.5, 128.1, 127.7, 127.6, 127.5, 126.8, 126.6, 126.0, 125.8, 123.7, 121.1, 111.7, 108.7, 51.2, 46.60, 46.57, 45.5, 39.5, 39.4, 39.2, 33.5, 10.1.

**HRMS (ESI):** Calculated for  $[\text{C}_{41}\text{H}_{34}\text{N}_3\text{O}_4, \text{M}+\text{H}]^+$ : 632.2544; Found: 632.2552.

**Optical Rotation:**  $[\alpha]_{\text{D}}^{25} = -85.7^\circ$  ( $c$  = 1.0,  $\text{CHCl}_3$ ).

**IR** (neat,  $\text{cm}^{-1}$ ) = 1737, 1706, 1438, 1398, 1241, 1199, 1166, 1072, 815, 749, 699, 630, 502.

**HPLC:** Daicel Chiralpak IC Column (*n*-Hexane/*i*-PrOH = 70 : 30, 1.0 mL/min), 30 °C, 254 nm,  $R_t$  = 24. 990 min (major) and 34. 240 min (minor). 93% ee.

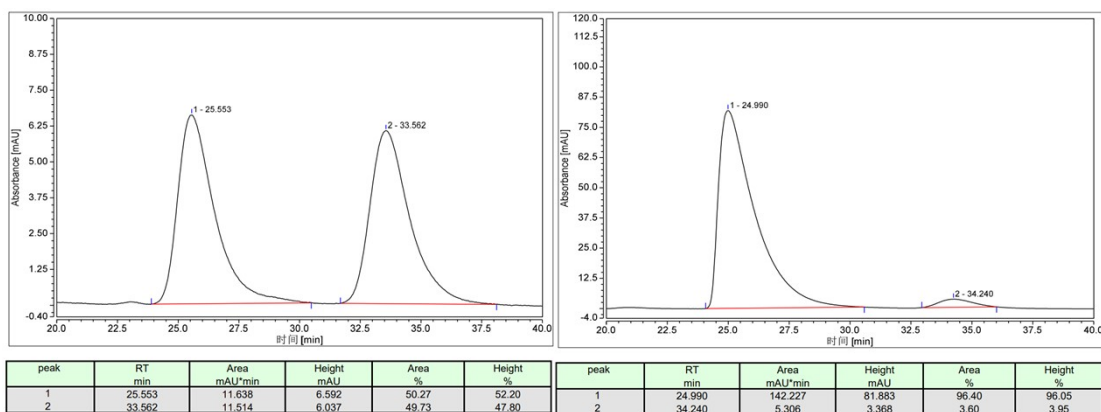

ethyl 1-((3*aS*,4*R*,5*R*,7*S*,7*aR*)-5-(1-(isoquinolin-1-yl)naphthalen-2-yl)-1,3-dioxooctahydro-2*H*-4,7-methanoisindol-2-yl)-2-methyl-5-(*p*-tolyl)-1*H*-pyrrole-3-carboxylate (**5b**)

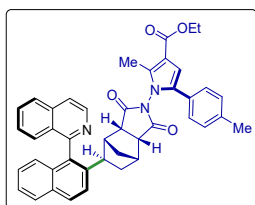

95% yield, white solid, **m.p.** = 147–149 °C. <sup>1</sup>H NMR (500 MHz, CDCl<sub>3</sub>) δ 8.67 (d, *J* = 5.7 Hz, 1H), 8.00 - 7.97 (m, 2H), 7.86 - 7.84 (m, 1H), 7.81 - 7.80 (m, 1H), 7.70 - 7.66 (m, 1H), 7.64 - 7.62 (m, 1H), 7.39 - 7.33 (m, 2H), 7.28 - 7.26 (m, 1H), 7.17 - 7.13 (m, 1H), 7.00 - 6.99 (m, 2H), 6.94 - 6.92 (m, 2H), 6.69 - 6.67 (m, 1H), 6.60 (s, 1H), 4.37 - 4.30 (m, 2H), 3.15 - 3.12 (m, 1H), 2.92 - 2.85 (m, 2H), 2.73 - 2.67 (m, 2H), 2.32 - 2.27 (m, 1H), 2.25 - 2.23 (m, 4H), 1.99 (s, 3H), 1.76 - 1.70 (m, 1H), 1.48 - 1.46 (m, 1H), 1.40 - 1.37 (m, 3H). <sup>13</sup>C NMR (126 MHz, CDCl<sub>3</sub>) δ 173.4, 171.9, 164.8, 159.4, 142.7, 139.6, 137.9, 136.9, 136.3, 136.0, 133.2, 132.9, 132.1, 130.5, 129.2, 128.9, 128.8, 128.0, 127.7, 127.54, 127.53, 127.2, 126.8, 126.6, 126.0, 125.7, 123.8, 121.1, 111.9, 108.4, 59.8, 46.61, 46.58, 45.5, 39.5, 39.4, 39.2, 33.5, 21.2, 14.6, 10.2.

**HRMS (ESI):** Calculated for [C<sub>43</sub>H<sub>37</sub>N<sub>3</sub>NaO<sub>4</sub>, M+Na]<sup>+</sup>: 682.2676; Found: 682.2687.

**Optical Rotation:** [ $\alpha$ ]<sub>D</sub><sup>25</sup> = -85.9° (c = 1.0, CHCl<sub>3</sub>).

**IR** (neat, cm<sup>-1</sup>) = 1737, 1701, 1403, 1240, 1195, 1166, 1069, 814, 772, 747, 593, 508.

**HPLC:** Daicel Chiralpak IA Column (*n*-Hexane/*i*-PrOH = 70 : 30, 1.0 mL/min), 30 °C, 254 nm, *R*<sub>t</sub> = 21.757 min (major) and 44.155 min (minor). 92% ee.

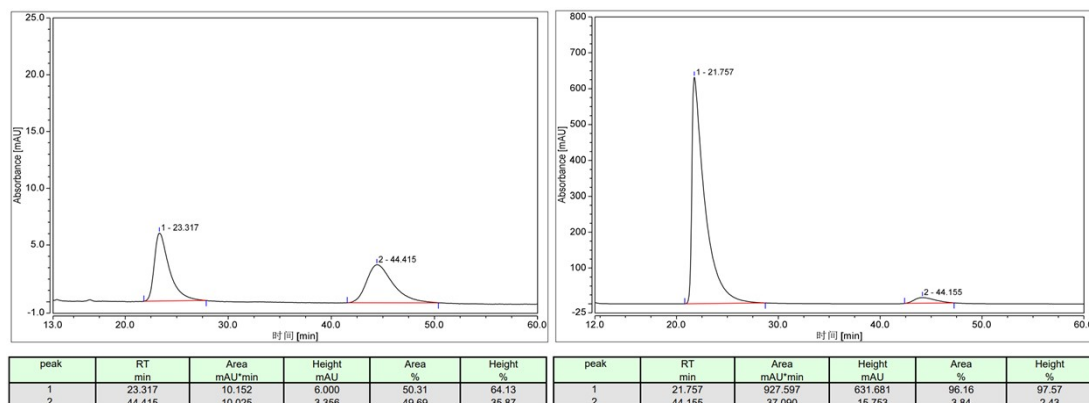

**methyl 1-((3a*S*,4*R*,5*R*,7*S*,7a*R*)-5-(1-(isoquinolin-1-yl)naphthalen-2-yl)-1,3-dioxooctahydro-2*H*-4,7-methanoisindol-2-yl)-5-(4-methoxyphenyl)-2-methyl-1*H*-pyrrole-3-carboxylate (5c)**

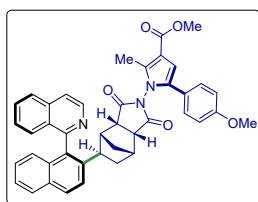

87% yield, white solid, **m.p.** = 150–152 °C. <sup>1</sup>H NMR (500 MHz, CDCl<sub>3</sub>) δ 8.59 (d, *J* = 5.8 Hz, 1H), 7.92 - 7.89 (m, 2H), 7.78 - 7.76 (m, 1H), 7.73 - 7.72 (m, 1H), 7.62 - 7.58 (m, 1H), 7.55 - 7.54 (m, 1H), 7.30 - 7.25 (m, 2H), 7.20 - 7.17 (m, 1H), 7.09 - 7.05 (m, 1H), 6.89 - 6.87 (m, 2H), 6.64 - 6.59 (m, 3H), 6.46 (s, 1H), 3.77 (s, 3H), 3.63 (s, 3H), 3.07 - 3.04 (m, 1H), 2.83 - 2.81 (m, 1H), 2.78 - 2.75 (m, 1H), 2.63 - 2.59 (m, 2H), 2.23 - 2.14 (m, 2H), 1.89 (s, 3H), 1.66 - 1.61 (m, 1H), 1.39 - 1.37 (m, 1H). <sup>13</sup>C NMR (126 MHz, CDCl<sub>3</sub>) δ 173.4, 171.9, 165.2, 159.5, 159.4, 142.7, 139.5, 136.9, 136.3, 136.0, 133.2, 132.7, 132.1, 130.5, 129.7, 128.84, 128.79, 127.7, 127.6, 127.5, 126.8, 126.6, 126.0, 125.7, 123.8, 122.4, 121.1, 113.9, 111.4, 108.1, 55.2, 51.1, 46.60, 46.57, 45.5, 39.5, 39.4, 39.2, 33.5, 10.1.

**HRMS (ESI):** Calculated for [C<sub>42</sub>H<sub>36</sub>N<sub>3</sub>O<sub>5</sub>, M+H]<sup>+</sup>: 662.2649; Found: 662.2671.

**Optical Rotation:** [ $\alpha$ ]<sub>D</sub><sup>25</sup> = -84.2° (c = 1.0, CHCl<sub>3</sub>).

**IR** (neat, cm<sup>-1</sup>) = 1737, 1705, 1587, 1496, 1439, 1395, 1245, 1199, 1167, 1074, 1027, 814, 773, 747, 595.

**HPLC:** Daicel Chiralpak AD-H Column (*n*-Hexane/*i*-PrOH = 50 : 50, 1.0 mL/min), 30 °C, 254 nm, *R*<sub>t</sub> = 10.522 min (major) and 34.975 min (minor). 90% ee.

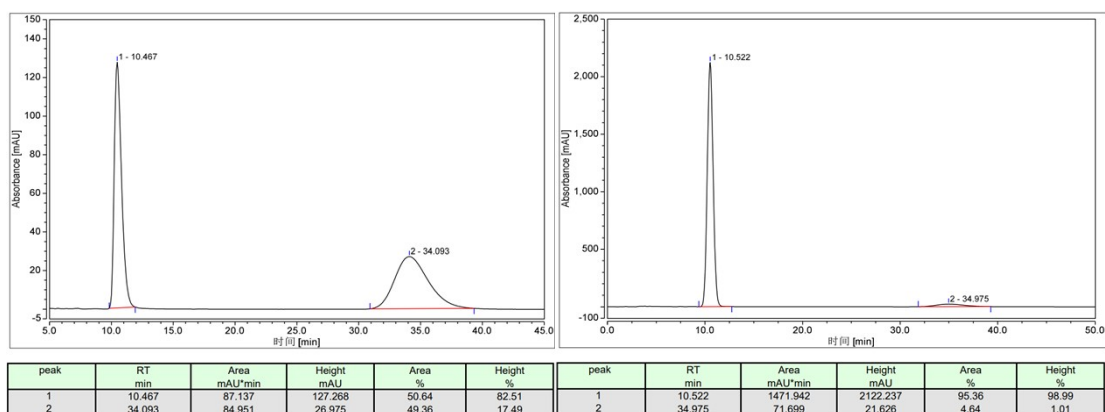

**ethyl 1-((3a*S*,4*R*,5*R*,7*S*,7a*R*)-5-(1-(isoquinolin-1-yl)naphthalen-2-yl)-1,3-dioxooctahydro-2*H*-4,7-methanoisindol-2-yl)-5-(3-methoxyphenyl)-2-methyl-1*H*-pyrrole-3-carboxylate (5d)**

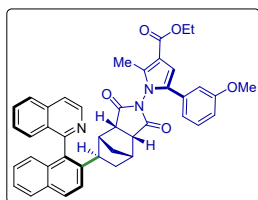

78% yield, white solid, **m.p.** = 116–118 °C. <sup>1</sup>H NMR (500 MHz, CDCl<sub>3</sub>) δ 8.67 (d, *J* = 5.7 Hz, 1H), 8.00 - 7.97 (m, 2H), 7.86 - 7.85 (m, 1H), 7.81 - 7.80 (m, 1H), 7.69 - 7.66 (m, 1H), 7.64 - 7.62 (m, 1H), 7.39 - 7.33 (m, 2H), 7.28 - 7.26 (m, 1H), 7.17 - 7.14 (m, 1H), 7.10 - 7.07 (m, 1H), 6.74 - 6.72 (m, 1H), 6.69 - 6.67 (m,

1H), 6.65 - 6.63 (m, 2H), 6.60 - 6.58 (m, 1H), 4.37 - 4.30 (m, 2H), 3.68 (s, 3H), 3.15 - 3.12 (m, 1H), 2.93 - 2.87 (m, 2H), 2.74 - 2.68 (m, 2H), 2.32 - 2.24 (m, 2H), 1.99 (s, 3H), 1.77 - 1.71 (m, 1H), 1.49-1.47 (m, 1H), 1.41 - 1.38 (m, 3H). <sup>13</sup>C NMR (126 MHz, CDCl<sub>3</sub>) δ 173.4, 171.9, 164.7, 159.6, 159.4, 142.7, 139.5, 136.9, 136.7, 136.0, 133.1, 132.7, 132.1, 131.4, 130.5, 129.5, 128.9, 128.8, 127.7, 127.6, 127.5, 126.8, 126.6, 126.0, 125.7, 123.8, 121.1, 120.0, 114.0, 113.5, 112.0, 108.9, 59.8, 55.2, 46.7, 46.6, 45.5, 39.6, 39.4, 39.2, 33.5, 14.6, 10.2.

**HRMS (ESI):** Calculated for [C<sub>43</sub>H<sub>38</sub>N<sub>3</sub>O<sub>5</sub>, M+H]<sup>+</sup>: 676.2806; Found: 676.2843.

**Optical Rotation:** [α]<sub>D</sub><sup>25</sup> = -92.5° (c = 1.0, CHCl<sub>3</sub>).

**IR** (neat, cm<sup>-1</sup>) = 3853, 3839, 3802, 3750, 3675, 3649, 2359, 1698, 1653, 1558, 1507, 1457.

**HPLC:** Daicel Chiralpak IA Column (*n*-Hexane/*i*-PrOH = 70 : 30, 1.0 mL/min), 30 °C, 254 nm, R<sub>t</sub> = 13.278 min (major) and 29.097 min (minor). 92% ee.

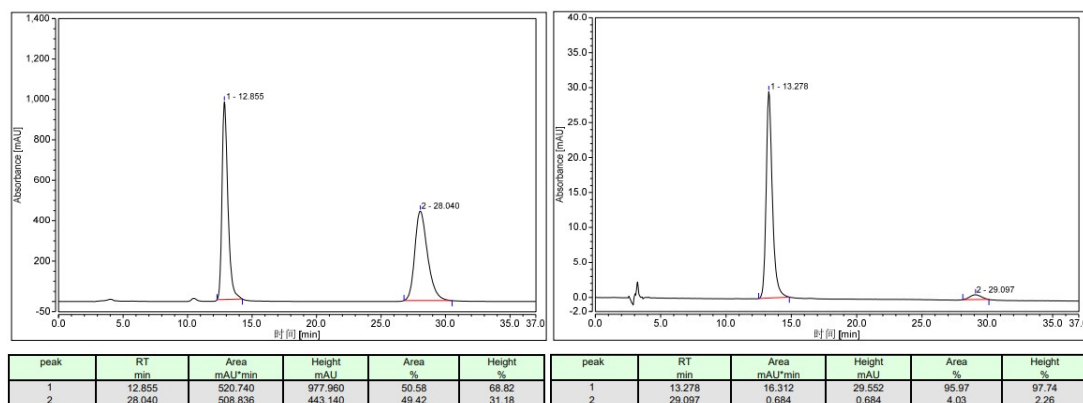

ethyl **1-((3a*S*,4*R*,5*R*,7*S*,7a*R*)-5-(1-(isoquinolin-1-yl)naphthalen-2-yl)-1,3-dioxooctahydro-2*H*-4,7-methanoisoindol-2-yl)-2-methyl-5-(naphthalen-1-yl)-1*H*-pyrrole-3-carboxylate (5e)**

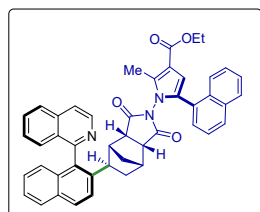

53% yield, white solid, **m.p.** = 115–117 °C. <sup>1</sup>H NMR (500 MHz, CDCl<sub>3</sub>) δ 8.68 (d, *J* = 5.7 Hz, 1H), 8.02 - 7.97 (m, 2H), 7.86 - 7.82 (m, 2H), 7.73 - 7.65 (m, 5H), 7.62 - 7.61 (m, 1H), 7.52 - 7.51 (m, 1H), 7.42 - 7.33 (m, 5H), 7.27 - 7.26 (m, 1H), 7.17 - 7.14 (m, 2H), 6.75 (s, 1H), 6.69 - 6.68 (m, 1H), 4.38 - 4.34 (m, 2H), 3.16 - 3.13 (m, 1H), 2.90 - 2.88 (m, 1H), 2.82 - 2.79 (m, 1H), 2.66 - 2.64 (m, 2H), 2.32 - 2.27 (m, 1H), 2.23 - 2.21 (m, 1H), 2.03 (s, 3H), 1.76 - 1.71 (m, 1H), 1.42 - 1.39 (m, 4H). <sup>13</sup>C NMR (126 MHz, CDCl<sub>3</sub>) δ 173.4, 171.9, 164.8, 159.4, 142.6, 139.5, 136.92, 136.85, 135.9, 133.1, 132.9, 132.7, 132.1, 130.5, 128.9, 128.8, 128.2, 128.0, 127.7, 127.62, 127.59, 127.55, 127.50, 127.0, 126.8, 126.6, 126.5, 126.4, 126.0, 125.8, 125.7, 123.8, 121.1, 112.2, 109.3, 59.9, 46.62, 46.60, 45.5, 39.6, 39.3, 39.2, 33.5, 14.6, 10.2.

**HRMS (ESI):** Calculated for [C<sub>46</sub>H<sub>38</sub>N<sub>3</sub>O<sub>4</sub>, M+H]<sup>+</sup>: 696.2857; Found: 696.2868.

**Optical Rotation:** [α]<sub>D</sub><sup>25</sup> = -65.7° (c = 1.0, CHCl<sub>3</sub>).

**IR** (neat, cm<sup>-1</sup>) = 1738, 1704, 1227, 1166, 1069, 815, 773, 747.

**HPLC:** Daicel Chiralpak IA Column (*n*-Hexane/*i*-PrOH = 70 : 30, 1.0 mL/min), 30 °C, 254 nm, R<sub>t</sub> = 17.930

min (major) and 54.032 min (minor). 95% ee.

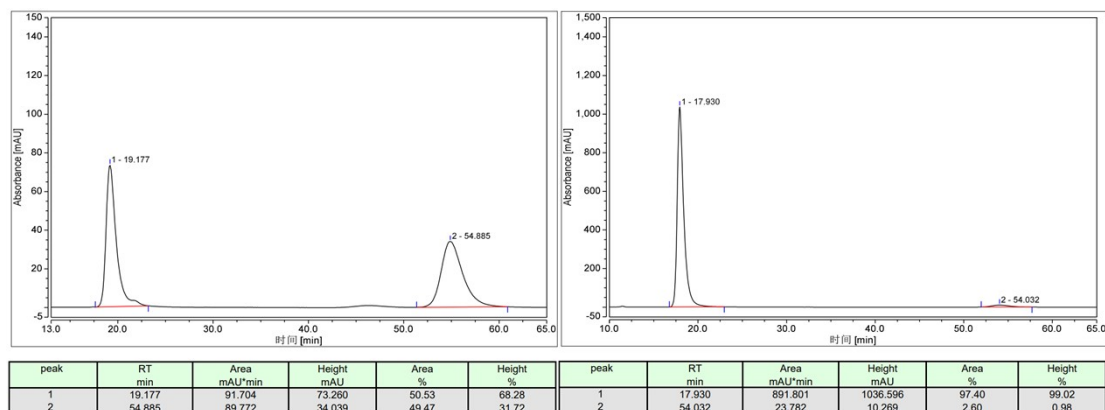

ethyl **5-(4-fluorophenyl)-1-((3*a*S,4*R*,5*R*,7*S*,7*a*R)-5-(1-(isoquinolin-1-yl)naphthalen-2-yl)-1,3-dioxooctahydro-2*H*-4,7-methanoisindol-2-yl)-2-methyl-1*H*-pyrrole-3-carboxylate (5f)**

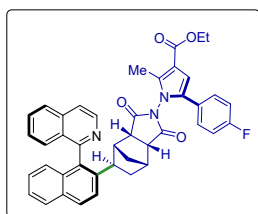

94% yield, white solid, **m.p.** = 141–143 °C. <sup>1</sup>H NMR (500 MHz, CDCl<sub>3</sub>) δ 8.67 (d, *J* = 5.7 Hz, 1H), 8.00 - 7.98 (m, 2H), 7.87 - 7.85 (m, 1H), 7.81 - 7.80 (m, 1H), 7.70 - 7.67 (m, 1H), 7.64 - 7.62 (m, 1H), 7.39 - 7.34 (m, 2H), 7.28 - 7.27 (m, 1H), 7.17 - 7.14 (m, 1H), 7.03 - 7.00 (m, 2H), 6.90 - 6.87 (m, 2H), 6.69 - 6.68 (m, 1H), 6.60 (s, 1H), 4.38 - 4.30 (m, 2H), 3.15 - 3.13 (m, 1H), 2.93 - 2.91 (m, 1H), 2.87 - 2.84 (m, 1H), 2.70 - 2.66 (m, 2H), 2.33 - 2.30 (m, 1H), 2.26 - 2.24 (m, 1H), 2.02 (s, 3H), 1.76 - 1.71 (m, 1H), 1.48 - 1.45 (m, 1H), 1.41 - 1.38 (m, 3H). <sup>13</sup>C NMR (126 MHz, CDCl<sub>3</sub>) δ 173.3, 171.9, 164.7, 162.5 (d, *J*<sub>C-F</sub> = 249.0 Hz), 159.4, 142.7, 139.4, 136.9, 136.5, 136.0, 133.1, 132.1, 131.8, 130.5, 130.2 (d, *J*<sub>C-F</sub> = 8.2 Hz), 128.9, 128.8, 127.6 (d, *J*<sub>C-F</sub> = 21.5 Hz), 127.5 (d, *J*<sub>C-F</sub> = 5.2 Hz), 126.8, 126.6, 126.2 (d, *J*<sub>C-F</sub> = 3.2 Hz), 126.0, 125.8, 123.8, 121.1, 115.6, 115.4, 112.0, 108.9, 59.9, 46.6, 45.6, 39.6, 39.3, 39.2, 33.4, 14.6, 10.2. <sup>19</sup>F NMR (471 MHz, CDCl<sub>3</sub>) δ -112.98 - -113.04 (m).

**HRMS (ESI):** Calculated for [C<sub>42</sub>H<sub>35</sub>FN<sub>3</sub>O<sub>4</sub>, M+H]<sup>+</sup>: 664.2606; Found: 664.2639.

**Optical Rotation:** [ $\alpha$ ]<sub>D</sub><sup>25</sup> = -97.3° (c = 1.0, CHCl<sub>3</sub>).

**IR** (neat, cm<sup>-1</sup>) = 1737, 1703, 1583, 1494, 1243, 1196, 1166, 1070, 813, 773, 748, 591, 519, 472.

**HPLC:** Daicel Chiralpak IA Column (*n*-Hexane/*i*-PrOH = 70 : 30, 1.0 mL/min), 30 °C, 254 nm, *R*<sub>t</sub> = 14.112 min (major) and 34.902 min (minor). 90% ee.

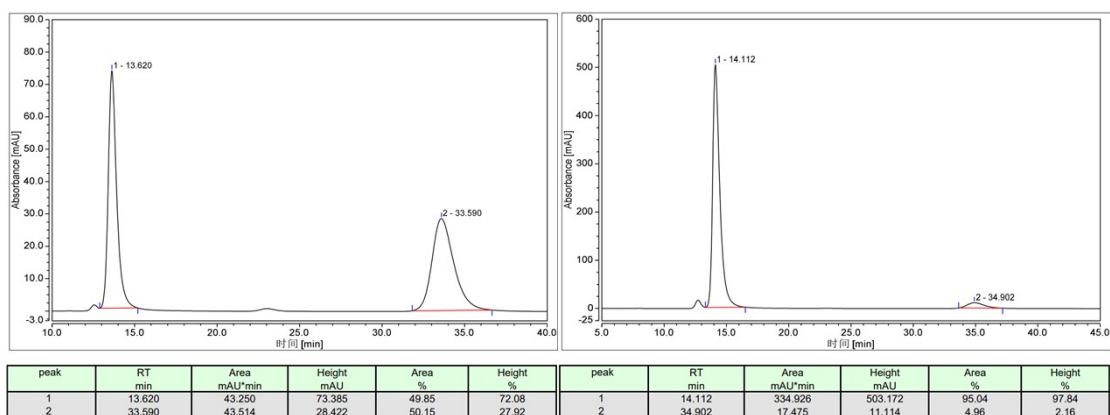

**methyl 5-(4-chlorophenyl)-1-((3aS,4R,5R,7S,7aR)-5-(1-(isoquinolin-1-yl)naphthalen-2-yl)-1,3-dioxooctahydro-2H-4,7-methanoisindol-2-yl)-2-methyl-1H-pyrrole-3-carboxylate (5g)**

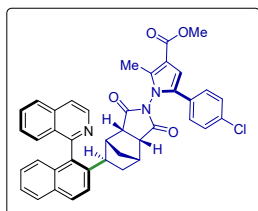

63% yield, white solid, **m.p.** = 146–148 °C. <sup>1</sup>H NMR (500 MHz, CDCl<sub>3</sub>) δ 8.66 (d, *J* = 5.7 Hz, 1H), 8.01 - 7.99 (m, 2H), 7.87 - 7.86 (m, 1H), 7.82 - 7.80 (m, 1H), 7.72 - 7.68 (m, 1H), 7.64 - 7.63 (m, 1H), 7.70 - 7.35 (m, 2H), 7.28 - 7.26 (m, 1H), 7.19 - 7.15 (m, 3H), 6.99 - 6.96 (m, 2H), 6.69 - 6.67 (m, 1H), 6.61 (s, 1H), 3.87 (s, 3H), 3.15 - 3.12 (m, 1H), 2.95 - 2.93 (m, 1H), 2.91 - 2.88 (m, 1H), 2.74 - 2.71 (m, 1H), 2.69 - 2.68 (m, 1H), 2.34 - 2.30 (m, 1H), 2.28 - 2.25 (m, 1H), 2.00 (s, 3H), 1.76 - 1.70 (m, 1H), 1.50 - 1.48 (m, 1H). <sup>13</sup>C NMR (126 MHz, CDCl<sub>3</sub>) δ 173.3, 171.8, 165.0, 159.4, 142.7, 139.4, 137.1, 136.9, 136.0, 134.2, 133.1, 132.1, 131.7, 130.5, 129.4, 128.9, 128.8, 128.6, 127.7, 127.6, 127.5, 126.8, 126.6, 126.0, 125.8, 123.7, 121.0, 111.8, 109.1, 51.2, 46.6, 45.6, 39.5, 39.4, 39.3, 33.4, 29.7, 10.1.

**HRMS (ESI):** Calculated for [C<sub>41</sub>H<sub>33</sub>ClN<sub>3</sub>O<sub>4</sub>, M+H]<sup>+</sup>: 666.2154; Found: 666.2184.

**Optical Rotation:** [α]<sub>D</sub><sup>25</sup> = -68.9° (c = 1.0, CHCl<sub>3</sub>).

**IR** (neat, cm<sup>-1</sup>) = 2920, 1738, 1707, 1583, 1438, 1399, 1259, 1199, 1163, 1074, 1014, 813, 773, 746, 687.

**HPLC:** Daicel Chiralpak IA Column (*n*-Hexane/*i*-PrOH = 70 : 30, 1.0 mL/min), 30 °C, 254 nm, *R*<sub>t</sub> = 18.173 min (major) and 53.325 min (minor). 91% ee.

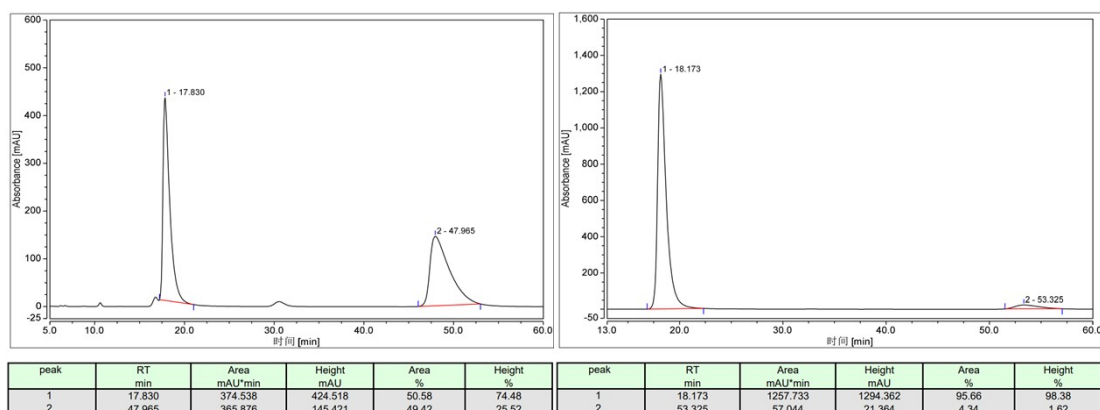

**methyl 1-((3aS,4R,5R,7S,7aR)-5-(1-((R)-isoquinolin-1-yl)naphthalen-2-yl)-1,3-dioxooctahydro-2H-4,7-methanoisindol-2-yl)-2-methyl-5-(thiophen-2-yl)-1H-pyrrole-3-carboxylate (5h)**

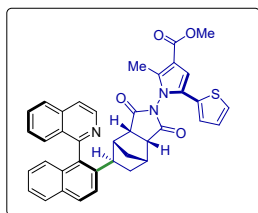

68% yield, white solid, **m.p.** = 149–151 °C. <sup>1</sup>H NMR (500 MHz, CDCl<sub>3</sub>) δ 8.66 (d, *J* = 5.8 Hz, 1H), 8.01 - 7.98 (m, 2H), 7.87 - 7.86 (m, 1H), 7.81 - 7.79 (m, 1H), 7.69 - 7.64 (m, 2H), 7.40 - 7.34 (m, 2H), 7.29 - 7.27 (m, 1H), 7.18 - 7.15 (m, 1H), 7.11 - 7.09 (m, 1H), 6.88 - 6.86 (m, 1H), 6.84 - 6.83 (m, 1H), 6.75 (s, 1H), 6.70 - 6.68 (m, 1H), 3.86 (s, 3H), 3.18 - 3.15 (m, 1H), 3.10 - 3.07 (m, 1H), 2.99 - 2.97 (m, 1H), 2.91 - 2.88 (m, 1H), 2.72 - 2.71 (m, 1H), 2.36 - 2.27 (m, 2H), 2.00 (s, 3H), 1.78 - 1.73 (m, 1H), 1.55 - 1.53 (m, 1H). <sup>13</sup>C NMR (126 MHz, CDCl<sub>3</sub>) δ 173.3 171.7, 165.0, 159.4, 142.7, 139.5, 137.1, 136.9, 136.0, 133.1, 132.1, 130.49, 130.47, 128.9, 128.8, 127.7, 127.6, 127.5, 127.4, 126.8, 126.6, 126.04, 125.95, 125.8, 125.6, 125.3, 123.8, 121.1, 111.8, 109.5, 51.2, 47.0, 46.9, 45.6, 39.6, 39.4, 39.3, 33.5, 10.0.

**HRMS (ESI):** Calculated for [C<sub>39</sub>H<sub>32</sub>N<sub>3</sub>O<sub>4</sub>S, M+H]<sup>+</sup>: 638.2108; Found: 638.2122.

**Optical Rotation:** [α]<sub>D</sub><sup>25</sup> = -99.1° (c = 1.0, CHCl<sub>3</sub>).

**IR** (neat, cm<sup>-1</sup>) = 1739, 1705, 1439, 1217, 1242, 1192, 1160, 1075, 815, 772, 747, 690, 629.

**HPLC:** Daicel Chiralpak AD-H Column (*n*-Hexane/*i*-PrOH = 50 : 50, 1.0 mL/min), 30 °C, 254 nm, *R*<sub>t</sub> = 10.212 min (major) and 51.627 min (minor). 90% ee.

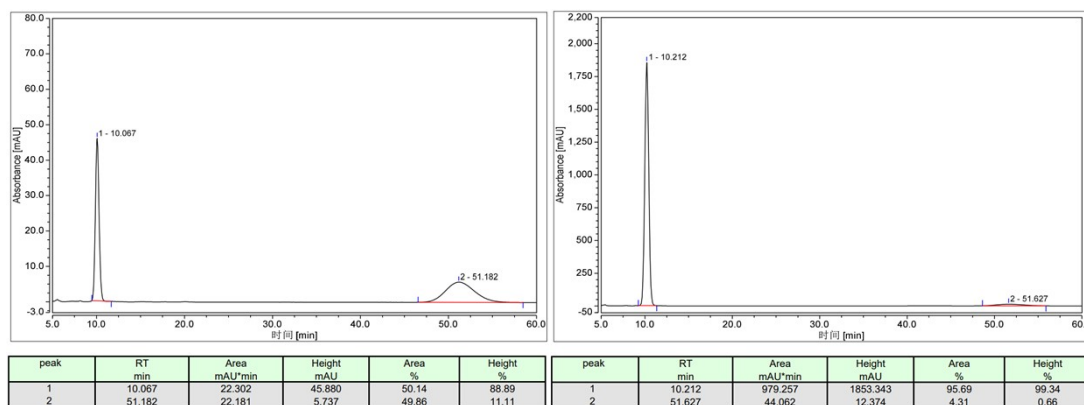

**methyl 5-(furan-2-yl)-1-((3aS,4R,5R,7S,7aR)-5-(1-(isoquinolin-1-yl)naphthalen-2-yl)-1,3-dioxooctahydro-2H-4,7-methanoisindol-2-yl)-2-methyl-1H-pyrrole-3-carboxylate (5i)**

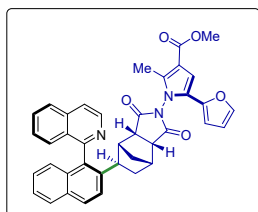

90% yield, white solid, **m.p.** = 156–158 °C. <sup>1</sup>H NMR (500 MHz, CDCl<sub>3</sub>) δ 8.65 (d, *J* = 5.7 Hz, 1H), 8.01 -

7.96 (m, 2H), 7.88 - 7.86 (m, 1H), 7.79 - 7.78 (m, 1H), 7.69 - 7.65 (m, 2H), 7.40 - 7.34 (m, 2H), 7.29 - 7.28 (m, 1H), 7.18 - 7.15 (m, 1H), 7.114 - 7.110 (m, 1H), 6.77 (s, 1H), 6.71 - 6.69 (m, 1H), 6.25 - 6.24 (m, 1H), 6.18 - 6.17 (m, 1H), 3.85 (s, 3H), 3.21 - 3.12 (m, 2H), 3.01 - 2.99 (m, 1H), 2.95 - 2.92 (m, 1H), 2.71 - 2.70 (m, 1H), 2.37 - 2.28 (m, 2H), 2.04 (s, 3H), 1.82 - 1.76 (m, 1H), 1.57 - 1.55 (m, 1H). <sup>13</sup>C NMR (126 MHz, CDCl<sub>3</sub>) δ 173.3, 171.8, 164.9, 159.4, 144.8, 142.6, 141.5, 139.5, 137.1, 136.9, 136.0, 133.1, 132.1, 130.5, 128.9, 128.8, 127.7, 127.6, 127.5, 126.8, 126.6, 126.1, 125.8, 123.8, 122.5, 121.1, 111.8, 111.3, 108.3, 106.5, 51.2, 47.0, 45.8, 39.7, 39.4, 39.3, 33.4, 9.8.

**HRMS (ESI):** Calculated for [C<sub>39</sub>H<sub>32</sub>N<sub>3</sub>O<sub>5</sub>, M+H]<sup>+</sup>: 622.2336; Found: 622.2349.

**Optical Rotation:** [α]<sub>D</sub><sup>25</sup> = -26.4° (c = 0.5, CHCl<sub>3</sub>).

**IR** (neat, cm<sup>-1</sup>) = 2961, 1741, 1708, 1439, 1258, 1161, 1076, 1014, 798, 746, 592.

**HPLC:** Daicel Chiralpak AD-H Column (*n*-Hexane/*i*-PrOH = 50 : 50, 1.0 mL/min), 30 °C, 254 nm, R<sub>t</sub> = 9.263 min (major) and 38.035 min (minor). 90% ee.

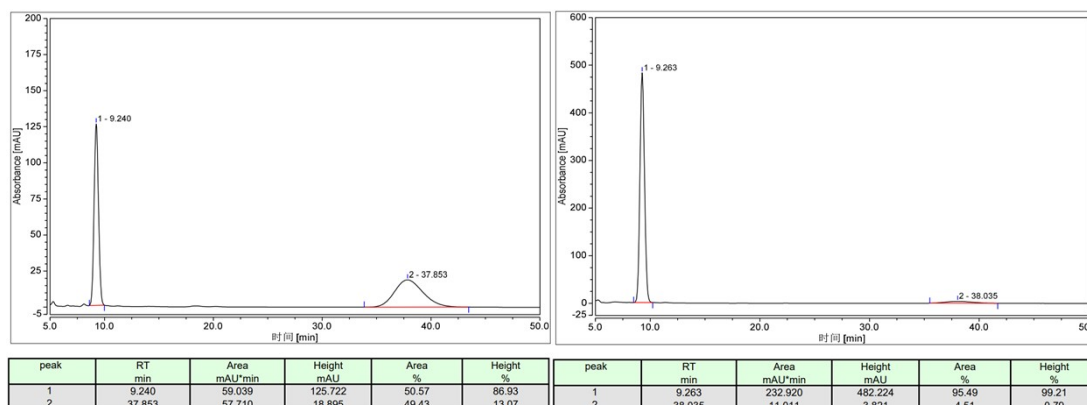

ethyl 1-((3*aS*,4*R*,5*R*,7*S*,7*aR*)-5-(1-(isoquinolin-1-yl)naphthalen-2-yl)-1,3-dioxoctahydro-2*H*-4,7-methanoisindol-2-yl)-2-methyl-5-phenyl-1*H*-pyrrole-3-carboxylate (**5j**)

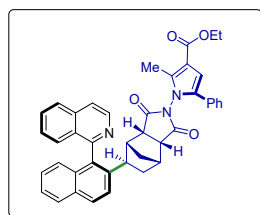

32% yield, white solid, **m.p.** = 140–142 °C. <sup>1</sup>H NMR (500 MHz, CDCl<sub>3</sub>) δ 8.67 (d, *J* = 5.8 Hz, 1H), 8.01 - 7.98 (m, 2H), 7.87 - 7.85 (m, 1H), 7.82 - 7.81 (m, 1H), 7.70 - 7.67 (m, 1H), 7.64 - 7.62 (m, 1H), 7.39 - 7.34 (m, 2H), 7.28 - 7.26 (m, 1H), 7.20 - 7.14 (m, 4H), 7.05 - 7.04 (m, 2H), 6.69 - 6.67 (m, 1H), 6.64 (s, 1H), 4.38 - 4.30 (m, 2H), 3.16 - 3.13 (m, 1H), 2.93 - 2.91 (m, 1H), 2.87 - 2.84 (m, 1H), 2.72 - 2.67 (m, 2H), 2.32 - 2.24 (m, 2H), 2.00 (s, 3H), 1.76 - 1.71 (m, 1H), 1.48 - 1.46 (m, 1H), 1.41 - 1.38 (m, 3H). <sup>13</sup>C NMR (126 MHz, CDCl<sub>3</sub>) δ 173.4, 171.9, 164.7, 159.4, 142.7, 139.5, 136.9, 136.5, 136.0, 133.1, 132.8, 132.1, 130.5, 130.1, 128.9, 128.8, 128.5, 128.1, 128.0, 127.7, 127.54, 127.52, 126.8, 126.6, 126.0, 125.7, 123.8, 121.1, 112.0, 108.8, 59.8, 46.6, 45.5, 39.5, 39.4, 39.2, 33.5, 14.6, 10.2.

**HRMS (ESI):** Calculated for [C<sub>42</sub>H<sub>36</sub>N<sub>3</sub>O<sub>4</sub>, M+H]<sup>+</sup>: 646.2700; Found: 646.2715.

**Optical Rotation:** [α]<sub>D</sub><sup>25</sup> = -97.9° (c = 1.0, CHCl<sub>3</sub>).

**IR** (neat, cm<sup>-1</sup>) = 2355, 1738, 1701, 1404, 1240, 1196, 1167, 1069, 815, 749, 699, 630, 501.



**HPLC:** Daicel Chiralpak IA Column (*n*-Hexane/*i*-PrOH = 70 : 30, 1.0 mL/min), 30 °C, 254 nm, *R*<sub>t</sub> = 15.025 min (major) and 38.260 min (minor). 91% ee.

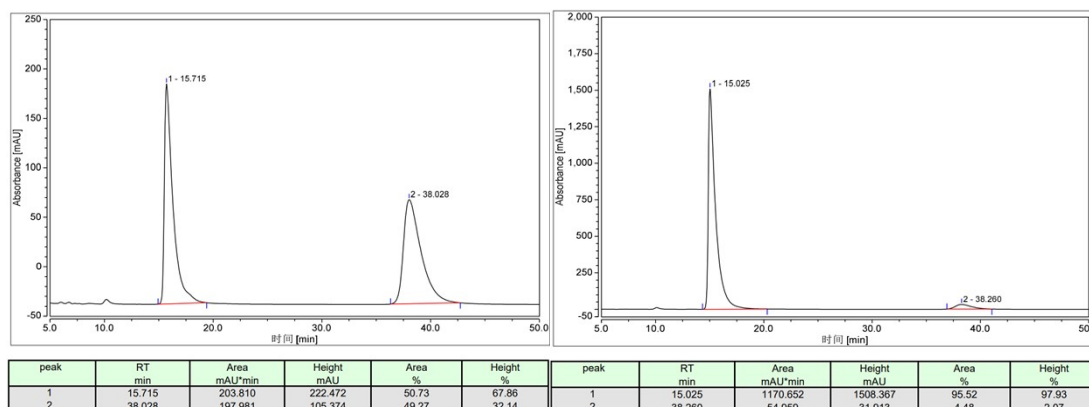

**tert-butyl 1-((3*a*S,4*R*,5*R*,7*S*,7*a*R)-5-(1-(isoquinolin-1-yl)naphthalen-2-yl)-1,3-dioxooctahydro-2*H*-4,7-methanoisindol-2-yl)-2-methyl-5-phenyl-1*H*-pyrrole-3-carboxylate (5k)**

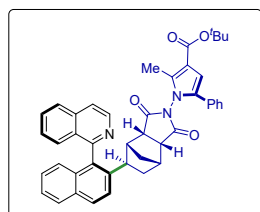

46% yield, white solid, **m.p.** = 158–160 °C. <sup>1</sup>H NMR (500 MHz, CDCl<sub>3</sub>) δ 8.67 (d, *J* = 5.8 Hz, 1H), 8.00 - 7.98 (m, 2H), 7.87 - 7.81 (m, 2H), 7.70 - 7.62 (m, 2H), 7.39 - 7.34 (m, 2H), 7.28 - 7.27 (m, 1H), 7.19 - 7.15 (m, 4H), 7.04 - 7.03 (m, 2H), 6.70 - 6.69 (m, 1H), 6.61 (s, 1H), 3.16 - 3.14 (m, 1H), 2.93 - 2.91 (m, 1H), 2.85 - 2.82 (m, 1H), 2.68 - 2.62 (m, 2H), 2.32 - 2.24 (m, 2H), 2.03 (s, 3H), 1.77 - 1.72 (m, 1H), 1.62 (s, 9H), 1.46 - 1.44 (m, 1H). <sup>13</sup>C NMR (126 MHz, CDCl<sub>3</sub>) δ 173.5, 171.9, 164.1, 159.4, 142.7, 139.5, 136.9, 136.0, 135.6, 133.1, 132.6, 132.1, 130.4, 130.3, 128.9, 128.8, 128.5, 128.1, 128.0, 127.7, 127.53, 127.50, 126.8, 126.6, 126.1, 125.7, 123.9, 121.1, 113.6, 109.1, 46.6, 45.7, 39.6, 39.3, 39.2, 33.2, 28.6, 10.4.

**HRMS (ESI):** Calculated for [C<sub>44</sub>H<sub>40</sub>N<sub>3</sub>O<sub>4</sub>, M+H]<sup>+</sup>: 674.3013; Found: 674.3022.

**Optical Rotation:** [α]<sup>25</sup><sub>D</sub> = -102.9° (c = 1.0, CHCl<sub>3</sub>).

**IR** (neat, cm<sup>-1</sup>) = 2349, 1739, 1695, 1402, 1250, 1155, 1068, 815, 748, 699, 630, 467.

**HPLC:** Daicel Chiralpak IA Column (*n*-Hexane/*i*-PrOH = 70 : 30, 1.0 mL/min), 30 °C, 254 nm, *R*<sub>t</sub> = 13.027 min (major) and 25.115 min (minor). 90% ee.

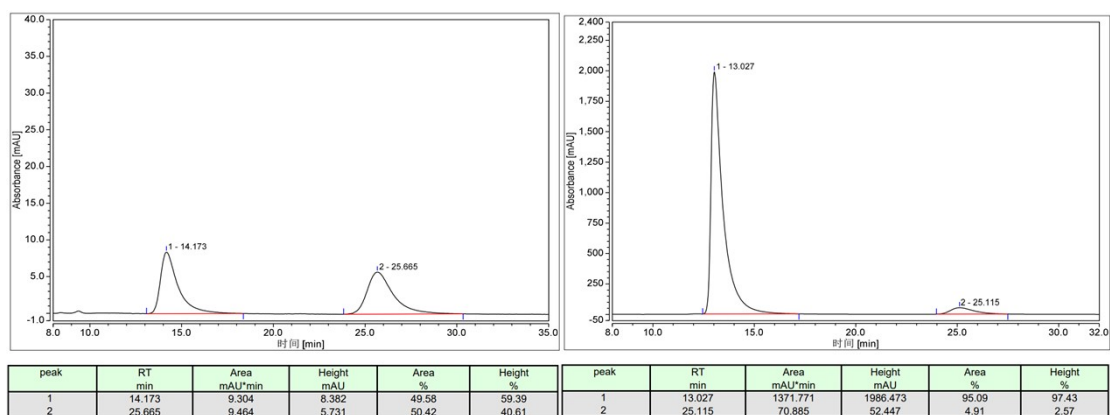

**benzyl 1-((3*a*S,4*R*,5*R*,7*S*,7*a*R)-5-(1-(isoquinolin-1-yl)naphthalen-2-yl)-1,3-dioxoctahydro-2*H*-4,7-methanoisindol-2-yl)-2-methyl-5-phenyl-1*H*-pyrrole-3-carboxylate (5l)**

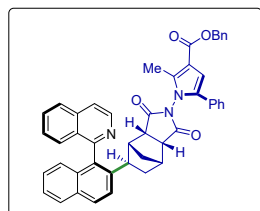

33% yield, white solid, **m.p.** = 118–120 °C. <sup>1</sup>H NMR (500 MHz, CDCl<sub>3</sub>) δ 8.61 (d, *J* = 5.8 Hz, 1H), 7.99 - 7.97 (m, 1H), 7.87 - 7.85 (m, 2H), 7.72 - 7.71 (m, 1H), 7.66 - 7.62 (m, 2H), 7.50 - 7.48 (m, 2H), 7.45 - 7.42 (m, 2H), 7.40 - 7.33 (m, 3H), 7.27 (s, 1H), 7.22 - 7.19 (m, 3H), 7.18 - 7.14 (m, 1H), 7.06 - 7.03 (m, 2H), 6.67 - 6.65 (m, 2H), 5.38 - 5.30 (m, 2H), 3.11 - 3.08 (m, 1H), 2.92 - 2.90 (m, 1H), 2.87 - 2.84 (m, 1H), 2.75 - 2.72 (m, 2H), 2.30 - 2.24 (m, 2H), 1.91 (s, 3H), 1.72 - 1.67 (m, 1H), 1.51 - 1.48 (m, 1H). <sup>13</sup>C NMR (126 MHz, CDCl<sub>3</sub>) δ 173.3, 171.9, 164.5, 159.4, 142.6, 139.5, 136.8, 136.7, 136.6, 135.9, 133.2, 132.9, 132.1, 130.5, 130.0, 128.8, 128.7, 128.6, 128.5, 128.22, 128.15, 128.1, 127.7, 127.6, 127.5, 126.7, 126.6, 126.0, 125.7, 123.6, 121.0, 111.7, 108.9, 65.7, 46.61, 46.57, 45.4, 39.53, 39.49, 39.2, 33.7, 29.7, 29.3, 14.1, 10.2.

**HRMS (ESI):** Calculated for [C<sub>47</sub>H<sub>38</sub>N<sub>3</sub>O<sub>4</sub>, M+H]<sup>+</sup>: 708.2857; Found: 708.2869.

**Optical Rotation:** [α]<sub>D</sub><sup>25</sup> = -77.7° (c = 1.0, CHCl<sub>3</sub>).

**IR** (neat, cm<sup>-1</sup>) = 1736, 1701, 1406, 1237, 1176, 1066, 765, 754, 747, 720, 702, 598.

**HPLC:** Daicel Chiralpak IC Column (*n*-Hexane/*i*-PrOH = 70 : 30, 1.0 mL/min), 30 °C, 254 nm, *R*<sub>t</sub> = 19.105 min (major) and 27.392 min (minor). 91% ee.

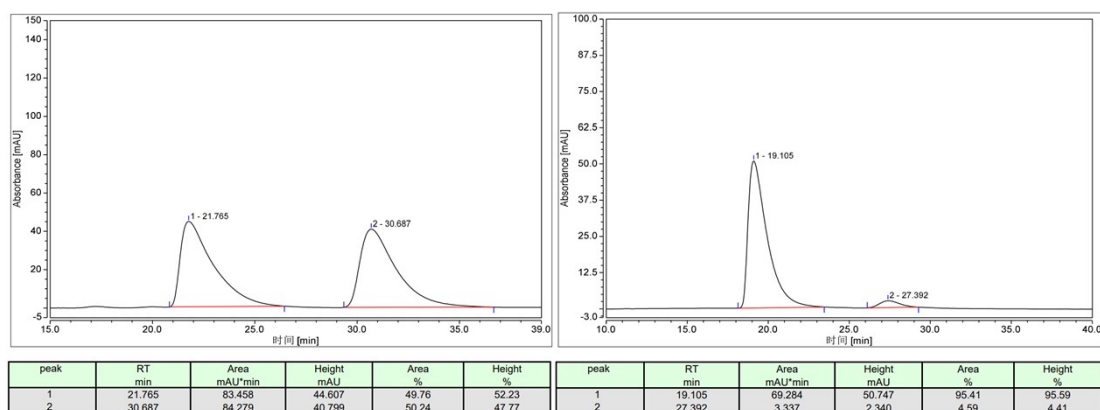

**methyl 1-((3*aS*,4*R*,5*R*,7*S*,7*aR*)-5-(1-(isoquinolin-1-yl)-4-methylnaphthalen-2-yl)-1,3-dioxooctahydro-2*H*-4,7-methanoisindol-2-yl)-2-methyl-5-phenyl-1*H*-pyrrole-3-carboxylate (5*m*)**

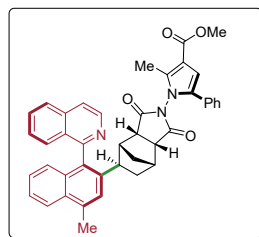

99% yield, white solid, **m.p.** = 254–256 °C. <sup>1</sup>**H NMR** (500 MHz, CDCl<sub>3</sub>) δ 8.67 (d, *J* = 5.8 Hz, 1H), 8.04 - 8.01 (m, 2H), 7.87 (s, 1H), 7.74 (s, 1H), 7.46 - 7.38 (m, 3H), 7.34 - 7.32 (m, 1H), 7.21 - 7.16 (m, 4H), 7.05 - 7.03 (m, 2H), 6.67 - 6.66 (m, 1H), 6.61 (s, 1H), 3.87 (s, 3H), 3.04 (s, 1H), 2.95 - 2.93 (m, 1H), 2.88 - 2.85 (m, 1H), 2.82 (s, 3H), 2.73 - 2.67 (m, 2H), 2.35 - 2.32 (m, 1H), 2.29 - 2.27 (m, 1H), 1.96 (s, 3H), 1.75 - 1.70 (m, 1H), 1.50 - 1.48 (m, 1H). <sup>13</sup>**C NMR** (126 MHz, CDCl<sub>3</sub>) δ 173.4, 171.9, 165.2, 159.7, 142.6, 139.0, 136.90, 136.87, 135.2, 134.3, 133.3, 132.9, 131.3, 130.4, 130.1, 129.0, 128.5, 128.10, 128.06, 127.5, 127.0, 126.7, 126.3, 125.6, 124.6, 124.0, 121.0, 111.7, 108.7, 51.2, 46.6, 45.6, 39.5, 39.4, 39.2, 33.4, 20.2, 10.1.

**HRMS (ESI)**: Calculated for [C<sub>42</sub>H<sub>36</sub>N<sub>3</sub>O<sub>4</sub>, M+H]<sup>+</sup>: 646.2700; Found: 646.2710.

**Optical Rotation**: [α]<sub>D</sub><sup>25</sup> = -91.3° (c = 1.0, CHCl<sub>3</sub>).

**IR** (neat, cm<sup>-1</sup>) = 2353, 1738, 1715, 1443, 1297, 1243, 1189, 1164, 1070, 826, 759, 697, 581, 500.

**HPLC**: Daicel Chiralpak IA Column (*n*-Hexane/*i*-PrOH = 70 : 30, 1.0 mL/min), 30 °C, 254 nm, *R*<sub>t</sub> = 16.803 min (major) and 36.840 min (minor). 91% ee.

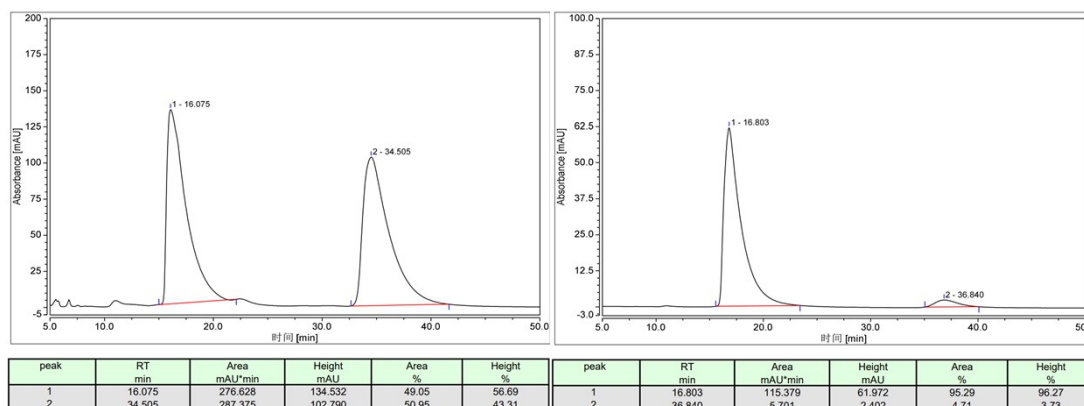

Recrystallized **5m** for X-Ray analysis : >99% ee

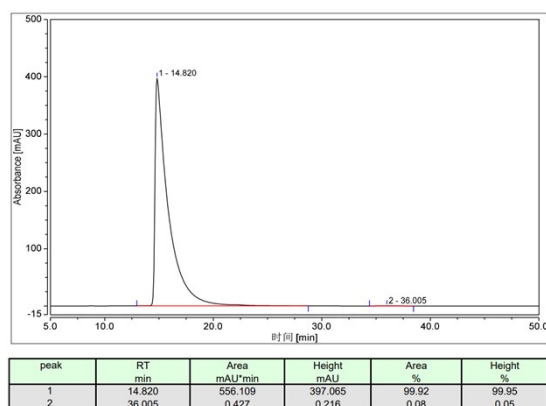

**methyl 2-methyl-1-((3*a*S,4*R*,5*R*,7*S*,7*a*R)-5-(1-(3-methylpyridin-2-yl)naphthalen-2-yl)-1,3-dioxooctahydro-2*H*-4,7-methanoisindol-2-yl)-5-phenyl-1*H*-pyrrole-3-carboxylate (5*n*)**

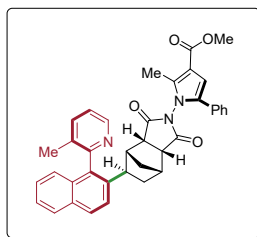

69% yield, white solid, **m.p.** = 114–116 °C. <sup>1</sup>H NMR (500 MHz, CDCl<sub>3</sub>) δ 8.57 (d, *J* = 5.6 Hz, 1H), 7.90 - 7.88 (m, 1H), 7.83 - 7.82 (m, 1H), 7.72 - 7.71 (m, 1H), 7.56 - 7.54 (m, 1H), 7.42 - 7.39 (m, 1H), 7.33 - 7.26 (m, 5H), 7.15 - 7.13 (m, 2H), 6.89 - 6.87 (m, 1H), 6.66 (s, 1H), 3.86 (s, 3H), 3.12 - 3.09 (m, 1H), 2.99 - 2.91 (m, 3H), 2.78 - 2.77 (m, 1H), 2.30 - 2.28 (m, 1H), 2.24 - 2.21 (m, 1H), 2.19 (s, 3H), 1.96 (s, 3H), 1.81 - 1.76 (m, 1H), 1.57 - 1.54 (m, 1H). <sup>13</sup>C NMR (126 MHz, CDCl<sub>3</sub>) δ 173.4, 172.4, 165.2, 156.9, 147.6, 138.62, 138.57, 136.9, 136.8, 133.3, 133.0, 132.2, 132.1, 130.2, 129.1, 128.6, 128.5, 128.23, 128.20, 127.9, 126.7, 125.7, 125.2, 123.7, 123.2, 111.7, 108.7, 51.2, 46.9, 46.7, 45.4, 39.7, 39.4, 39.2, 33.8, 18.8, 10.6.

**HRMS (ESI):** Calculated for [C<sub>38</sub>H<sub>34</sub>N<sub>3</sub>O<sub>4</sub>, M+H]<sup>+</sup>: 596.2544; Found: 596.2563.

**Optical Rotation:** [ $\alpha$ ]<sub>D</sub><sup>25</sup> = -69.0° (c = 1.0, CHCl<sub>3</sub>).

**IR** (neat, cm<sup>-1</sup>) = 2919, 1738, 1706, 1438, 1243, 1200, 1075, 814, 763, 700, 627, 472.

**HPLC:** Daicel Chiralpak IA Column (*n*-Hexane/*i*-PrOH = 70 : 30, 1.0 mL/min), 30 °C, 254 nm, *R*<sub>t</sub> = 14.965 min (major) and 38.445 min (minor). 93% ee.

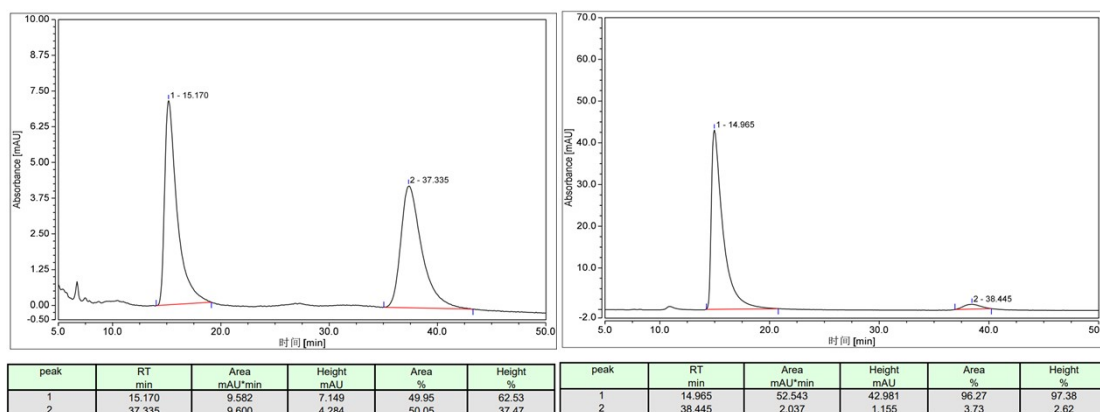

**methyl 2-methyl-1-((3*a*S,4*R*,5*R*,7*S*,7*a*R)-5-(4-methyl-1-(3-methylpyridin-2-yl)naphthalen-2-yl)-1,3-dioxooctahydro-2*H*-4,7-methanoisindol-2-yl)-5-phenyl-1*H*-pyrrole-3-carboxylate (5*o*)**

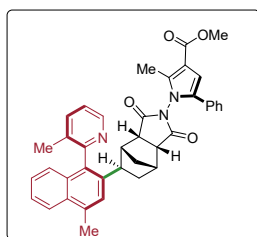

47% yield, white solid, **m.p.** = 130–132 °C. <sup>1</sup>H NMR (500 MHz, CDCl<sub>3</sub>) δ 8.56 (d, *J* = 6.7 Hz, 1H), 7.99 - 7.97 (m, 1H), 7.71 - 7.69 (m, 1H), 7.46 - 7.43 (m, 1H), 7.37 (s, 1H), 7.31 - 7.26 (m, 6H), 7.15 - 7.13 (m, 2H),

6.90 - 6.88 (m, 1H), 6.66 (s, 1H), 3.87 (s, 3H), 3.09 - 3.06 (m, 1H), 3.00 - 2.97 (m, 2H), 2.94 - 2.91 (m, 1H), 2.78 - 2.77 (m, 1H), 2.75 (s, 3H), 2.33 - 2.31 (m, 1H), 2.25 - 2.21 (m, 1H), 2.18 (s, 3H), 1.95 (s, 3H), 1.80 - 1.75 (m, 1H), 1.58 - 1.56 (m, 1H). <sup>13</sup>C NMR (126 MHz, CDCl<sub>3</sub>) δ 173.4, 172.4, 165.2, 157.3, 147.7, 138.4, 138.0, 136.8, 135.4, 134.7, 133.4, 133.0, 132.2, 131.4, 130.2, 128.6, 128.2, 126.3, 125.8, 125.5, 124.5, 124.1, 123.0, 111.7, 108.6, 51.2, 46.9, 46.8, 45.4, 39.8, 39.3, 39.2, 33.7, 20.1, 18.9, 10.6.

**HRMS (ESI):** Calculated for [C<sub>39</sub>H<sub>36</sub>N<sub>3</sub>O<sub>4</sub>, M+H]<sup>+</sup>: 610.2700; Found: 610.2708.

**Optical Rotation:** [α]<sup>25</sup><sub>D</sub> = -61.5° (c = 1.0, CHCl<sub>3</sub>).

**IR** (neat, cm<sup>-1</sup>) = 2917, 1737, 1705, 1438, 1397, 1242, 1199, 1167, 1074, 796, 755, 700, 663.

**HPLC:** Daicel Chiralpak IA Column (*n*-Hexane/*i*-PrOH = 70 : 30, 1.0 mL/min), 30 °C, 254 nm, R<sub>t</sub> = 12.562 min (major) and 36.472 min (minor). 90% ee.

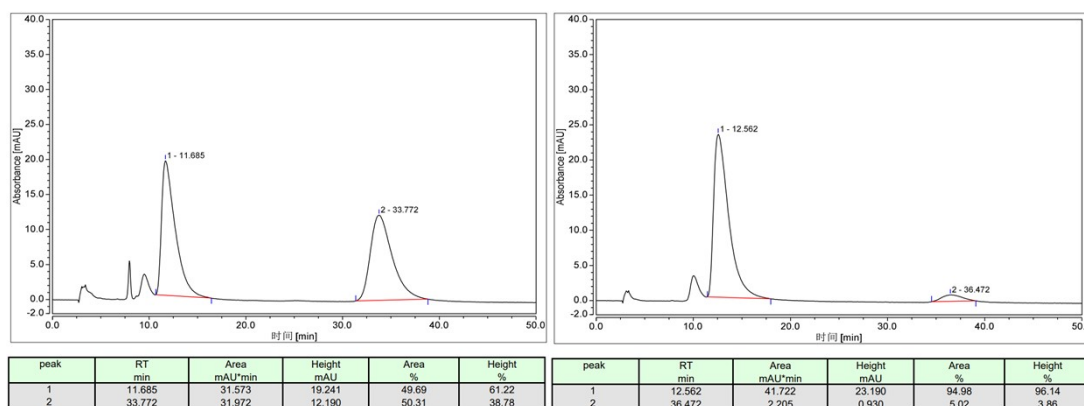

**methyl 1-((3*aS*,4*R*,5*R*,7*S*,7*aR*)-5-(2-(isoquinolin-1-yl)-3-methylphenyl)-1,3-dioxoctahydro-2*H*-4,7-methanoisindol-2-yl)-2-methyl-5-phenyl-1*H*-pyrrole-3-carboxylate (5p)**

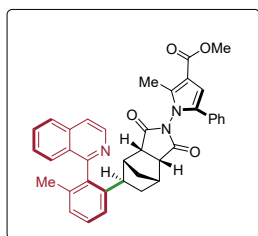

56% yield, white solid, **m.p.** = 92–94 °C. <sup>1</sup>H NMR (500 MHz, CDCl<sub>3</sub>) δ 8.59 (d, *J* = 5.8 Hz, 1H), 7.98 - 7.96 (m, 1H), 7.74 - 7.70 (m, 2H), 7.49 - 7.43 (m, 2H), 7.38 - 7.35 (m, 1H), 7.29 - 7.27 (m, 1H), 7.20 - 7.19 (m, 4H), 7.04 - 7.02 (m, 2H), 6.60 (s, 1H), 3.86 (s, 3H), 2.95 - 2.92 (m, 1H), 2.86 - 2.80 (m, 2H), 2.70 - 2.67 (m, 1H), 2.60 - 2.59 (m, 1H), 2.19 - 2.12 (m, 2H), 1.89 (s, 3H), 1.71 (s, 3H), 1.61 - 1.56 (m, 1H), 1.42 - 1.40 (m, 1H). <sup>13</sup>C NMR (126 MHz, CDCl<sub>3</sub>) δ 173.3, 171.9, 165.1, 160.2, 142.5, 142.1, 138.8, 137.6, 136.9, 136.8, 132.8, 130.4, 130.1, 128.53, 128.48, 128.3, 128.1, 127.9, 127.61, 127.57, 126.2, 123.6, 120.7, 111.6, 108.6, 51.1, 46.6, 46.4, 45.2, 39.2, 39.11, 39.07, 33.4, 20.0, 9.9.

**HRMS (ESI):** Calculated for [C<sub>38</sub>H<sub>34</sub>N<sub>3</sub>O<sub>4</sub>, M+H]<sup>+</sup>: 596.2544; Found: 596.2551.

**Optical Rotation:** [α]<sup>25</sup><sub>D</sub> = -123.3° (c = 1.0, CHCl<sub>3</sub>).

**IR** (neat, cm<sup>-1</sup>) = 1738, 1706, 1438, 1397, 1242, 1199, 1166, 1073, 825, 759, 700, 647, 593.

**HPLC:** Daicel Chiralpak IA Column (*n*-Hexane/*i*-PrOH = 70 : 30, 1.0 mL/min), 30 °C, 254 nm, R<sub>t</sub> = 8.853 min (major) and 12.212 min (minor). 81% ee.

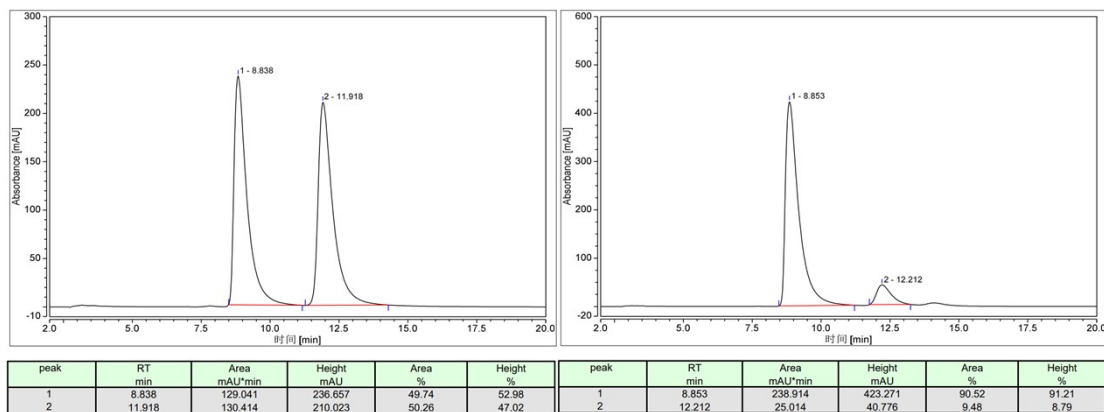

**methyl 1-((3*aS*,4*R*,5*R*,7*S*,7*aR*)-5-(2-(isoquinolin-1-yl)-3,5-dimethylphenyl)-1,3-dioxooctahydro-2*H*-4,7-methanoisindol-2-yl)-2-methyl-5-phenyl-1*H*-pyrrole-3-carboxylate (5q)**

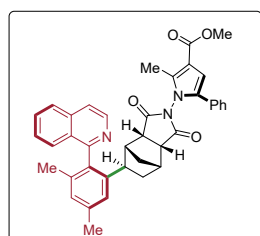

84% yield, white solid, **m.p.** = 136–138 °C. <sup>1</sup>H NMR (500 MHz, CDCl<sub>3</sub>) δ 8.57 (d, *J* = 5.8 Hz, 1H), 7.96 - 7.94 (m, 1H), 7.71 - 7.68 (m, 2H), 7.46 - 7.45 (m, 2H), 7.19 - 7.18 (m, 3H), 7.07 - 7.01 (m, 4H), 6.60 (s, 1H), 3.86 (s, 3H), 2.93 - 2.90 (m, 1H), 2.85 - 2.79 (m, 2H), 2.69 - 2.65 (m, 1H), 2.59 - 2.58 (m, 1H), 2.41 (s, 3H), 2.18 - 2.12 (m, 2H), 1.90 (s, 3H), 1.67 (s, 3H), 1.60 - 1.55 (m, 1H), 1.41 - 1.39 (m, 1H). <sup>13</sup>C NMR (126 MHz, CDCl<sub>3</sub>) δ 173.4, 171.9, 165.1, 160.4, 142.5, 142.0, 137.7, 137.4, 136.9, 136.8, 136.0, 132.8, 130.3, 130.1, 129.2, 128.5, 128.11, 128.05, 127.52, 127.49, 126.3, 124.3, 120.6, 111.6, 108.6, 51.1, 46.6, 46.4, 45.2, 39.1, 33.3, 21.7, 19.9, 9.9.

**HRMS (ESI):** Calculated for [C<sub>39</sub>H<sub>36</sub>N<sub>3</sub>O<sub>4</sub>, M+H]<sup>+</sup>: 610.2700; Found: 610.2714.

**Optical Rotation:** [α]<sup>25</sup><sub>D</sub> = -96.4° (c = 1.0, CHCl<sub>3</sub>).

**IR** (neat, cm<sup>-1</sup>) = 1738, 1706, 1438, 1396, 1242, 1199, 1166, 1073, 824, 760, 699.

**HPLC:** Daicel Chiralpak IC Column (*n*-Hexane/*i*-PrOH = 70 : 30, 1.0 mL/min), 30 °C, 254 nm, *R*<sub>t</sub> = 10.315 min (major) and 26.427 min (minor). 80% ee.

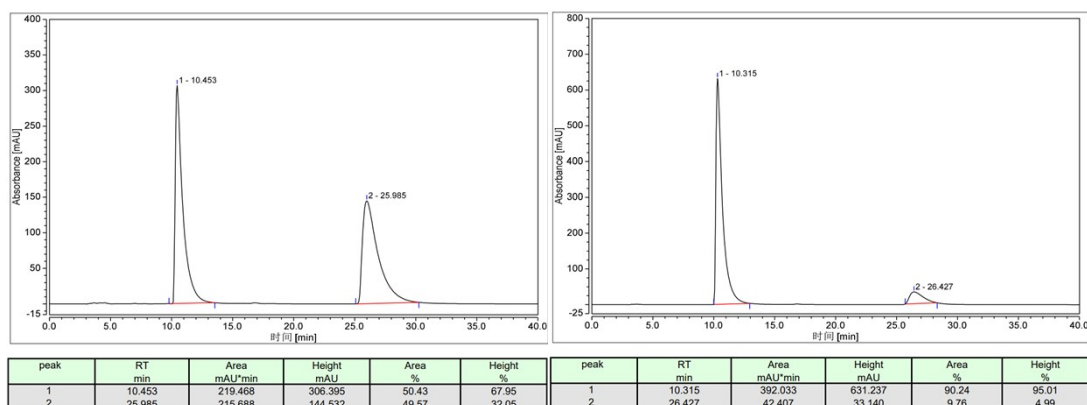

**methyl 1-((3aS,4R,5R,7S,7aR)-5-(1-(benzo[h]isoquinolin-1-yl)-4-methylnaphthalen-2-yl)-1,3-dioxooctahydro-2H-4,7-methanoisindol-2-yl)-2-methyl-5-phenyl-1H-pyrrole-3-carboxylate (5r)**

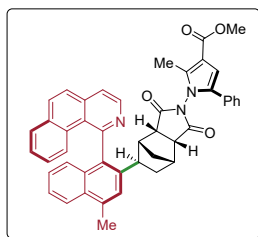

99% yield, white solid, **m.p.** = 138–140 °C. <sup>1</sup>H NMR (500 MHz, CDCl<sub>3</sub>) δ 8.82 (d, *J* = 5.3 Hz, 1H), 8.02 - 8.00 (m, 1H), 7.95 - 7.93 (m, 1H), 7.84 - 7.79 (m, 3H), 7.51 (s, 1H), 7.38 - 7.30 (m, 3H), 7.13 - 7.12 (m, 3H), 7.06 - 7.03 (m, 1H), 6.99 - 6.95 (m, 3H), 6.78 - 6.76 (m, 1H), 6.60 (s, 1H), 3.85 (s, 3H), 3.19 - 3.16 (m, 1H), 2.91 - 2.89 (m, 1H), 2.85 (s, 3H), 2.78 - 2.75 (m, 1H), 2.49 - 2.46 (m, 2H), 2.38 - 2.35 (m, 1H), 2.25 - 2.22 (m, 1H), 2.09 (s, 3H), 1.76 - 1.71 (m, 1H), 1.33 - 1.31 (m, 1H). <sup>13</sup>C NMR (126 MHz, CDCl<sub>3</sub>) δ 173.4, 171.7, 165.2, 156.7, 144.4, 139.0, 138.8, 136.8, 135.1, 133.4, 133.0, 132.5, 132.1, 132.0, 130.1, 129.3, 129.2, 128.5, 128.04, 128.00, 127.1, 126.8, 126.52, 126.45, 126.4, 126.1, 125.9, 125.6, 124.1, 122.2, 111.7, 108.6, 51.2, 46.61, 46.58, 44.6, 39.7, 39.2, 39.1, 32.7, 20.3, 10.3.

**HRMS (ESI):** Calculated for [C<sub>46</sub>H<sub>38</sub>N<sub>3</sub>O<sub>4</sub>, M+H]<sup>+</sup>: 696.2857; Found: 696.2872.

**Optical Rotation:** [α]<sub>D</sub><sup>25</sup> = -93.3° (c = 1.0, CHCl<sub>3</sub>).

**IR** (neat, cm<sup>-1</sup>) = 2349, 1738, 1705, 1438, 1241, 1198, 1166, 1073, 855, 750, 699, 497.

**HPLC:** Daicel Chiralpak IA Column (*n*-Hexane/*i*-PrOH = 70 : 30, 1.0 mL/min), 30 °C, 254 nm, *R*<sub>t</sub> = 9.857 min (major) and 32.920 min (minor). 89% ee.

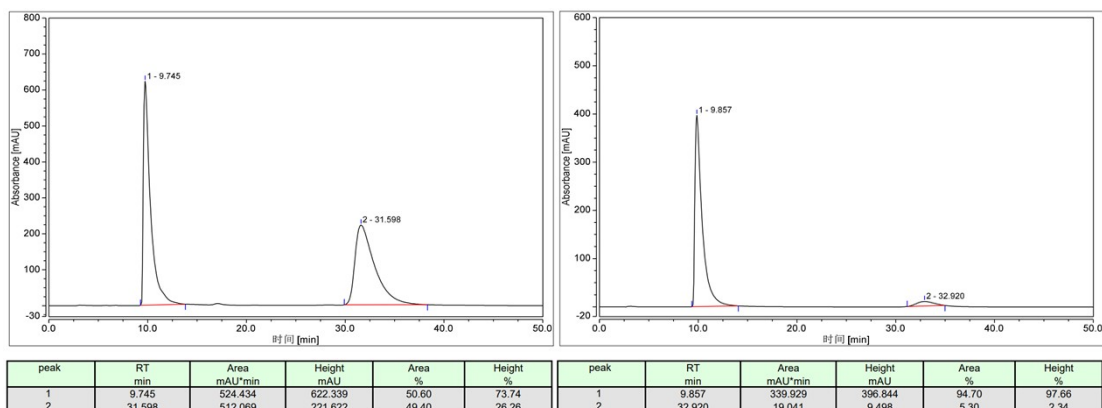

**methyl 1-((3aS,4R,5R,7S,7aR)-5-(1-(benzo[h]isoquinolin-1-yl)-4-bromonaphthalen-2-yl)-1,3-dioxooctahydro-2H-4,7-methanoisindol-2-yl)-2-methyl-5-phenyl-1H-pyrrole-3-carboxylate (5s)**

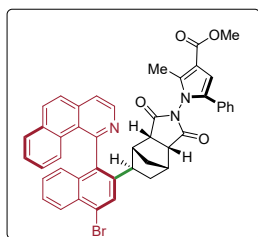

99% yield, white solid, **m.p.** = 149–151 °C. <sup>1</sup>H NMR (500 MHz, CDCl<sub>3</sub>) δ 8.82 (d, *J* = 5.2 Hz, 1H), 8.28 - 8.26 (m, 1H), 8.00 - 7.97 (m, 2H), 7.87 - 7.82 (m, 3H), 7.46 - 7.43 (m, 1H), 7.40 - 7.37 (m, 1H), 7.29 - 7.28

(m, 1H), 7.15 - 7.09 (m, 4H), 7.04 - 7.01 (m, 1H), 7.00 - 6.97 (m, 2H), 6.77 - 6.75 (m, 1H), 6.60 - 6.59 (m, 1H), 3.86 (s, 3H), 3.18 - 3.15 (m, 1H), 2.93 - 2.91 (m, 1H), 2.80 - 2.77 (m, 1H), 2.52 - 2.50 (m, 2H), 2.33 - 2.28 (m, 1H), 2.19 - 2.17 (m, 1H), 2.051 - 2.047 (m, 3H), 1.77 - 1.73 (m, 1H), 1.38 - 1.36 (m, 1H). <sup>13</sup>C NMR (126 MHz, CDCl<sub>3</sub>) δ 173.2, 171.5, 165.2, 155.4, 144.5, 140.8, 138.9, 138.4, 136.7, 133.5, 133.1, 133.0, 132.7, 131.3, 130.0, 129.5, 129.0, 128.9, 128.5, 128.1, 128.0, 127.8, 127.5, 127.4, 127.2, 127.0, 126.4, 126.2, 126.0, 125.6, 123.8, 122.5, 111.7, 108.6, 51.2, 46.5, 44.5, 39.6, 39.2, 39.0, 32.9, 10.2.

**HRMS (ESI):** Calculated for [C<sub>45</sub>H<sub>35</sub>BrN<sub>3</sub>O<sub>4</sub>, M+H]<sup>+</sup>: 760.1805; Found: 760.1810.

**Optical Rotation:** [α]<sub>D</sub><sup>25</sup> = -85.9° (c = 1.0, CHCl<sub>3</sub>).

**IR** (neat, cm<sup>-1</sup>) = 3853, 3735, 3649, 3629, 2361, 2341, 1698, 1653, 1558, 1507, 1541, 1457.

**HPLC:** Daicel Chiralpak IA Column (*n*-Hexane/*i*-PrOH = 70 : 30, 1.0 mL/min), 30 °C, 254 nm, R<sub>t</sub> = 8.665 min (major) and 23.467 min (minor). 80% ee.

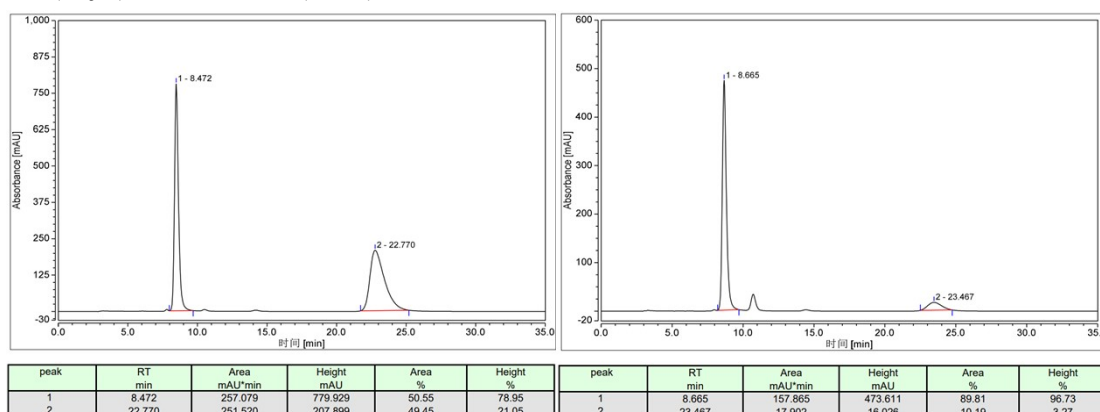

**methyl 1-((3a*S*,4*R*,5*R*,7*S*,7*aR*)-5-(5-(benzo[*h*]isoquinolin-1-yl)-1,2-dihydroacenaphthylen-4-yl)-1,3-dioxooctahydro-2*H*-4,7-methanoisindol-2-yl)-2-methyl-5-phenyl-1*H*-pyrrole-3-carboxylate (5t)**

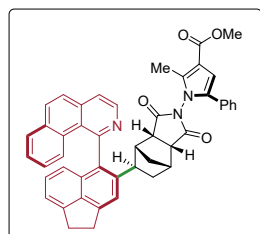

99% yield, white solid, **m.p.** = 143–145 °C. <sup>1</sup>H NMR (500 MHz, CDCl<sub>3</sub>) δ 8.80 (d, *J* = 5.3 Hz, 1H), 7.95 - 7.93 (m, 1H), 7.83 - 7.79 (m, 3H), 7.51 (s, 1H), 7.47 - 7.45 (m, 1H), 7.36 - 7.33 (m, 1H), 7.14 - 7.12 (m, 4H), 7.03 - 6.97 (m, 4H), 6.60 (s, 1H), 6.43 - 6.41 (m, 1H), 3.85 (s, 3H), 3.55 - 3.35 (m, 5H), 2.91 - 2.89 (m, 1H), 2.80 - 2.76 (m, 1H), 2.57 - 2.50 (m, 2H), 2.41 - 2.37 (m, 1H), 2.26 - 2.24 (m, 1H), 2.10 (s, 3H), 1.79 - 1.74 (m, 1H), 1.35 - 1.33 (m, 1H). <sup>13</sup>C NMR (126 MHz, CDCl<sub>3</sub>) δ 173.5, 171.8, 165.2, 156.4, 146.7, 145.7, 144.5, 139.3, 138.7, 138.5, 136.9, 133.4, 133.0, 132.4, 130.1, 129.4, 129.3, 128.7, 128.5, 128.03, 128.01, 127.1, 126.7, 126.4, 126.2, 125.9, 122.0, 120.5, 119.6, 118.2, 111.7, 108.6, 51.2, 46.7, 46.6, 44.8, 40.1, 39.2, 39.1, 32.9, 30.7, 30.6, 10.2.

**HRMS (ESI):** Calculated for [C<sub>47</sub>H<sub>38</sub>N<sub>3</sub>O<sub>4</sub>, M+H]<sup>+</sup>: 708.2857; Found: 708.2887.

**Optical Rotation:** [α]<sub>D</sub><sup>25</sup> = -89.6° (c = 1.0, CHCl<sub>3</sub>).

**IR** (neat, cm<sup>-1</sup>) = 3853, 3735, 3649, 2361, 2341, 1699, 1558, 1541, 1508, 1457, 750, 699.

**HPLC:** Daicel Chiralpak IA Column (*n*-Hexane/*i*-PrOH = 70 : 30, 1.0 mL/min), 30 °C, 254 nm, R<sub>t</sub> = 11.767



min (major) and 21.782 min (minor). 89% ee.

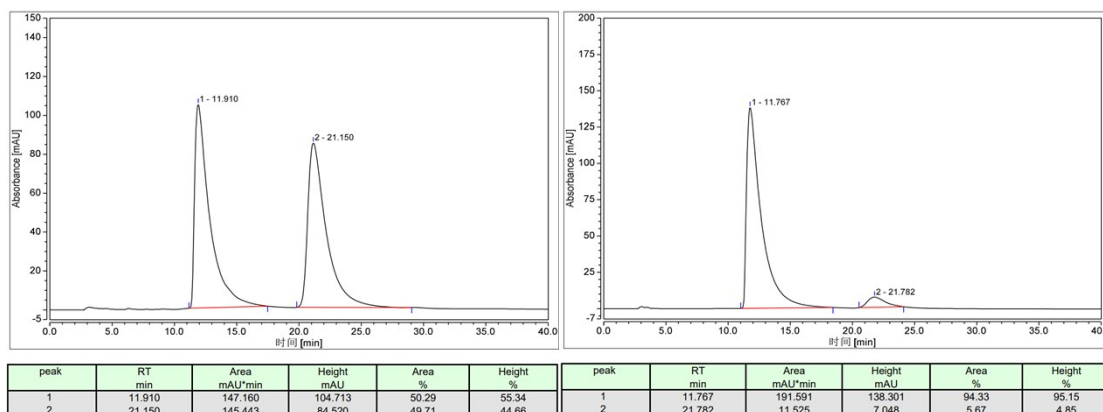

### 3. Construction of *exo*-atropisomers **7**:

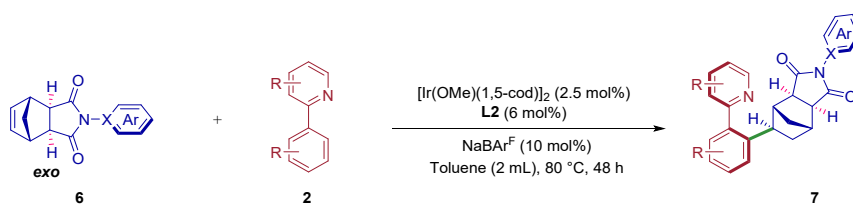

**General procedure G:** To an oven-dried 10 mL Schlenk tube containing a stirring bar was charged with  $[\text{Ir}(\text{OMe})(1,5\text{-cod})]_2$  (0.0025 mmol, 1.7 mg), **L2** (0.006 mmol, 4.1 mg) and 1.0 mL dry toluene in a nitrogen-filled glove-box, the mixture was stirred for 10 min at room temperature. Then corresponding substrate **6** (0.1 mmol, 1.0 equiv.), corresponding substrate **2** (0.12 mmol, 1.2 equiv.), NaBAR<sup>F</sup> (0.01 mmol, 8.9 mg) and another 1.0 mL dry toluene were added sequentially. The mixture was stirred at 80 °C for 48 hours, concentrated to dryness and the crude mixture was purified by flash column chromatography on silica gel using a mixture of Hexane/EtOAc (3/1, v/v) as eluent to obtain the desired product.

#### (3*aR*,4*R*,5*R*,7*S*,7*aS*)-2-(2-(*tert*-butyl)phenyl)-5-(1-(isoquinolin-1-yl)naphthalen-2-yl)hexahydro-1*H*-4,7-methanoisindole-1,3(2*H*)-dione (**7a**)

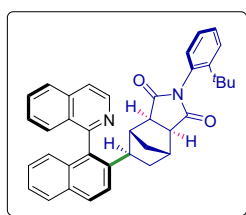

95% yield, white solid, **m.p.** = 157–159 °C. <sup>1</sup>H NMR (500 MHz, CDCl<sub>3</sub>) δ 8.75 (d, *J* = 5.8 Hz, 1H), 8.01 - 7.99 (m, 1H), 7.98 - 7.96 (m, 1H), 7.91 - 7.89 (m, 1H), 7.81 - 7.80 (m, 1H), 7.74 - 7.71 (m, 1H), 7.63 - 7.61 (m, 1H), 7.53 - 7.52 (m, 1H), 7.47 - 7.35 (m, 4H), 7.28 - 7.26 (m, 1H), 7.24 - 7.21 (m, 1H), 6.91 - 6.89 (m, 1H), 6.78 - 6.76 (m, 1H), 3.13 (s, 1H), 2.88 - 2.87 (m, 1H), 2.61 - 2.59 (m, 1H), 2.50 - 2.47 (m, 1H), 2.30 - 2.28 (m, 1H), 1.99 - 1.96 (m, 1H), 1.89 - 1.84 (m, 1H), 1.51 - 1.46 (m, 2H), 1.18 (s, 9H). <sup>13</sup>C NMR (126 MHz, CDCl<sub>3</sub>) δ 178.8, 178.5, 160.2, 147.8, 142.5, 140.8, 136.3, 135.0, 133.0, 132.1, 130.74, 130.68, 130.4, 129.8, 129.2, 128.7, 128.4, 128.1, 127.9, 127.4, 127.1, 126.9, 126.6, 125.8, 125.6, 122.8, 120.5, 49.8, 48.3, 44.9,

43.5, 40.8, 39.6, 35.5, 33.4, 31.5.

**HRMS (ESI):** Calculated for  $[C_{38}H_{34}N_2NaO_2, M+Na]^+$ : 573.2512; Found: 573.2521.

**Optical Rotation:**  $[\alpha]^{25}_D = -12.3^\circ$  ( $c = 1.0$ ,  $CHCl_3$ ).

**IR** (neat,  $cm^{-1}$ ) = 2963, 1710, 1492, 1442, 1371, 1182, 810, 751, 691, 624, 463.

**HPLC:** Daicel Chiralpak IA Column (*n*-Hexane/*i*-PrOH = 70 : 30, 1.0 mL/min), 30 °C, 254 nm,  $R_t = 14.298$  min (major) and 9.405 min (minor). 96% ee.

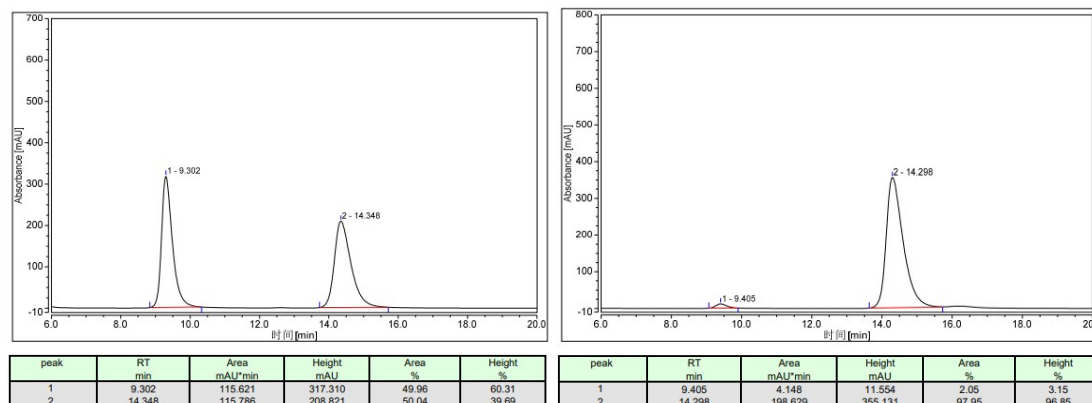

**(3*aR*,4*R*,5*R*,7*S*,7*aS*)-2-(3-(*tert*-butyl)-[1,1'-biphenyl]-4-yl)-5-(1-(isoquinolin-1-yl)naphthalen-2-yl)hexahydro-1*H*-4,7-methanoisoindole-1,3(2*H*)-dione (7b)**

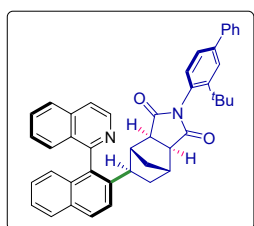

90% yield, white solid, **m.p.** = 146–148 °C. **<sup>1</sup>H NMR** (500 MHz, Chloroform-*d*)  $\delta$  8.74 (d,  $J = 5.8$  Hz, 1H), 8.00 - 7.99 (m, 1H), 7.96 - 7.94 (m, 1H), 7.89 - 7.88 (m, 1H), 7.80 - 7.79 (m, 1H), 7.72 - 7.69 (m, 2H), 7.64 - 7.62 (m, 1H), 7.54 - 7.52 (m, 2H), 7.46 - 7.38 (m, 6H), 7.36 - 7.33 (m, 1H), 7.22 - 7.20 (m, 1H), 6.92 - 6.90 (m, 1H), 6.86 - 6.84 (m, 1H), 3.14 (s, 1H), 2.90 - 2.89 (m, 1H), 2.62 - 2.60 (m, 1H), 2.52 - 2.49 (m, 1H), 2.30 - 2.28 (m, 1H), 2.00 - 1.98 (m, 1H), 1.91 - 1.86 (m, 1H), 1.53 - 1.48 (m, 2H), 1.23 (s, 9H). **<sup>13</sup>C NMR** (126 MHz,  $CDCl_3$ )  $\delta$  178.9, 178.6, 160.2, 148.0, 142.8, 142.5, 140.80, 140.76, 136.3, 135.1, 133.0, 132.1, 130.8, 130.7, 129.8, 129.2, 128.8, 128.4, 128.1, 127.95, 127.89, 127.7, 127.4, 127.1, 126.9, 126.6, 126.3, 125.9, 125.6, 122.8, 120.5, 49.8, 48.4, 44.9, 43.5, 40.8, 39.6, 35.7, 33.5, 31.6.

**HRMS (ESI):** Calculated for  $[C_{44}H_{39}N_2O_2, M+H]^+$ : 627.3006; Found: 627.3012.

**Optical Rotation:**  $[\alpha]^{25}_D = 12.2^\circ$  ( $c = 1.0$ ,  $CHCl_3$ ).

**IR** (neat,  $cm^{-1}$ ) = 1710, 1483, 1367, 1179, 807, 749, 696, 621.

**HPLC:** Daicel Chiralpak IA Column (*n*-Hexane/*i*-PrOH = 70 : 30, 1.0 mL/min), 30 °C, 254 nm,  $R_t = 20.233$  min (major) and 12.405 min (minor). 93% ee.

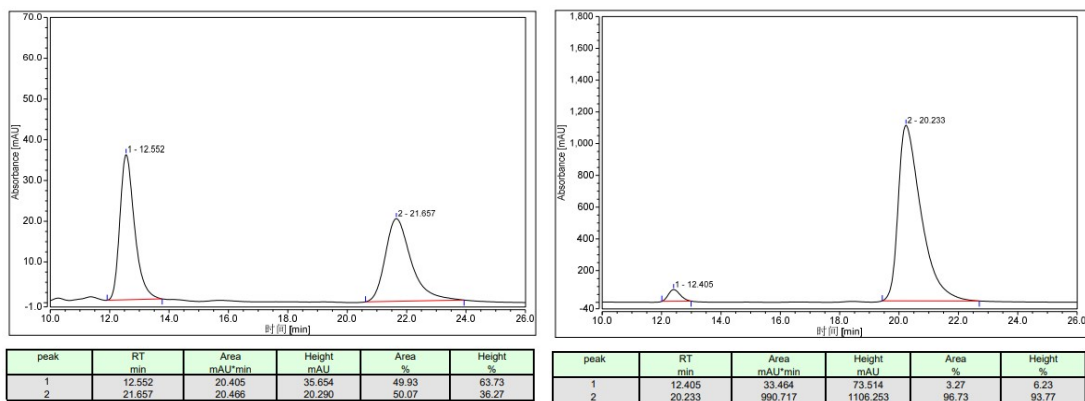

**(3aR,4R,5R,7S,7aS)-2-(3-(*tert*-butyl)-2'-methyl-[1,1'-biphenyl]-4-yl)-5-(1-(isoquinolin-1-yl)naphthalen-2-yl)hexahydro-1H-4,7-methanoisindole-1,3(2H)-dione (7c)**

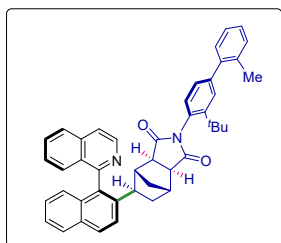

95% yield, white solid, **m.p.** = 135–137 °C. <sup>1</sup>H NMR (500 MHz, Chloroform-d) δ 8.75 (d, *J* = 5.8 Hz, 1H), 8.01 - 7.99 (m, 1H), 7.97 - 7.95 (m, 1H), 7.90 - 7.88 (m, 1H), 7.80 - 7.79 (m, 1H), 7.73 - 7.70 (m, 1H), 7.64 - 7.62 (m, 1H), 7.471 - 7.467 (m, 1H), 7.45 - 7.42 (m, 1H), 7.41 - 7.39 (m, 2H), 7.26 - 7.25 (m, 2H), 7.24 - 7.20 (m, 4H), 6.93 - 6.91 (m, 1H), 6.82 - 6.81 (m, 1H), 3.12 (s, 1H), 2.90 - 2.89 (m, 1H), 2.62 - 2.61 (m, 1H), 2.53 - 2.50 (m, 1H), 2.28 - 2.27 (m, 4H), 1.99 - 1.97 (m, 1H), 1.92 - 1.87 (m, 1H), 1.54 - 1.48 (m, 2H), 1.20 (s, 9H). <sup>13</sup>C NMR (126 MHz, CDCl<sub>3</sub>) δ 179.0, 178.6, 160.2, 147.4, 143.1, 142.6, 141.2, 140.7, 136.3, 135.4, 135.1, 133.0, 132.1, 130.7, 130.5, 130.1, 129.94, 129.85, 129.3, 129.2, 128.4, 128.14, 128.06, 127.9, 127.6, 127.1, 126.9, 126.6, 125.90, 125.86, 125.6, 122.8, 120.4, 49.8, 48.3, 45.0, 43.5, 40.8, 39.6, 35.7, 33.4, 31.6, 20.6.

**HRMS (ESI):** Calculated for [C<sub>45</sub>H<sub>40</sub>N<sub>2</sub>NaO<sub>2</sub>, M+Na]<sup>+</sup>: 663.2982; Found: 663.2987.

**Optical Rotation:** [α]<sub>D</sub><sup>25</sup> = 7.9° (c = 1.0, CHCl<sub>3</sub>).

**IR** (neat, cm<sup>-1</sup>) = 1710, 1481, 1392, 1367, 955, 807, 748, 694, 623, 442.

**HPLC:** Daicel Chiralpak IA Column (*n*-Hexane/*i*-PrOH = 70 : 30, 1.0 mL/min), 30 °C, 254 nm, *R*<sub>t</sub> = 12.732 min (major) and 8.253 min (minor). 97% ee.

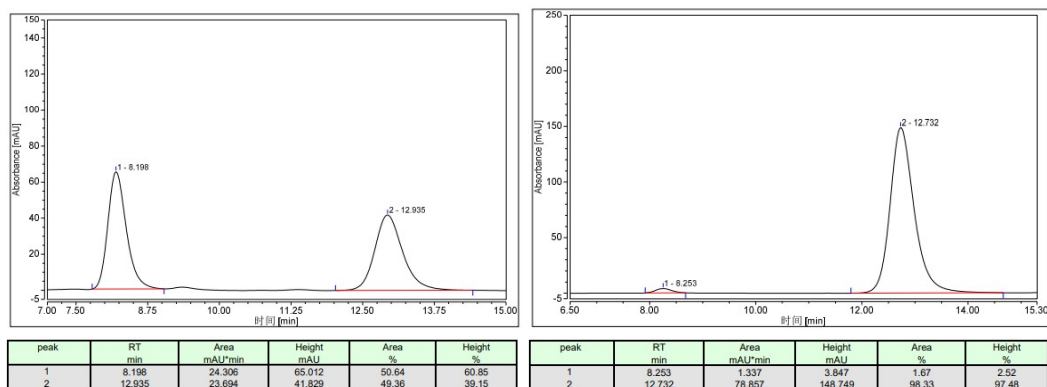

**(3*aR*,4*R*,5*R*,7*S*,7*aS*)-2-(3-(*tert*-butyl)-2'-methoxy-[1,1'-biphenyl]-4-yl)-5-(1-(isoquinolin-1-yl)naphthalen-2-yl)hexahydro-1*H*-4,7-methanoisindole-1,3(2*H*)-dione (7d)**

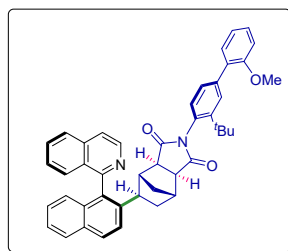

93% yield, white solid, **m.p.** = 126–128 °C. <sup>1</sup>H NMR (500 MHz, Chloroform-*d*) δ 8.75 (d, *J* = 5.7 Hz, 1H), 8.01 - 7.99 (m, 1H), 7.98 - 7.96 (m, 1H), 7.91 - 7.89 (m, 1H), 7.81 - 7.80 (m, 1H), 7.74 - 7.71 (m, 1H), 7.67 - 7.66 (m, 1H), 7.64 - 7.62 (m, 1H), 7.47 - 7.44 (m, 1H), 7.43 - 7.38 (m, 3H), 7.34 - 7.28 (m, 2H), 7.24 - 7.21 (m, 1H), 7.03 - 7.00 (m, 1H), 6.98 - 6.96 (m, 1H), 6.92 - 6.90 (m, 1H), 6.79 - 6.78 (m, 1H), 3.78 (s, 3H), 3.12 (s, 1H), 2.89 - 2.88 (m, 1H), 2.61 - 2.60 (m, 1H), 2.52 - 2.48 (m, 1H), 2.29 - 2.27 (m, 1H), 1.99 - 1.96 (m, 1H), 1.90 - 1.86 (m, 1H), 1.53 - 1.48 (m, 2H), 1.21 (s, 9H). <sup>13</sup>C NMR (126 MHz, CDCl<sub>3</sub>) δ 178.9, 178.6, 160.2, 148.0, 142.8, 142.5, 140.80, 140.76, 136.3, 135.1, 133.0, 132.1, 130.8, 130.7, 129.8, 129.2, 128.8, 128.4, 128.1, 127.95, 127.89, 127.7, 127.4, 127.1, 126.9, 126.6, 126.3, 125.9, 125.6, 122.8, 120.5, 49.8, 48.4, 44.9, 43.5, 40.8, 39.6, 35.7, 33.5, 31.6.

**HRMS (ESI):** Calculated for [C<sub>45</sub>H<sub>40</sub>N<sub>2</sub>NaO<sub>3</sub>, M+Na]<sup>+</sup>: 679.2931; Found: 679.2937.

**Optical Rotation:** [α]<sub>D</sub><sup>25</sup> = 11.5° (c = 1.0, CHCl<sub>3</sub>).

**IR** (neat, cm<sup>-1</sup>) = 2921, 1709, 1483, 1393, 1367, 1259, 1181, 1019, 805, 749, 694, 442.

**HPLC:** Daicel Chiralpak IA Column (*n*-Hexane/*i*-PrOH = 70 : 30, 1.0 mL/min), 30 °C, 254 nm, *R*<sub>t</sub> = 17.008 min (major) and 12.617 min (minor). 93% ee.

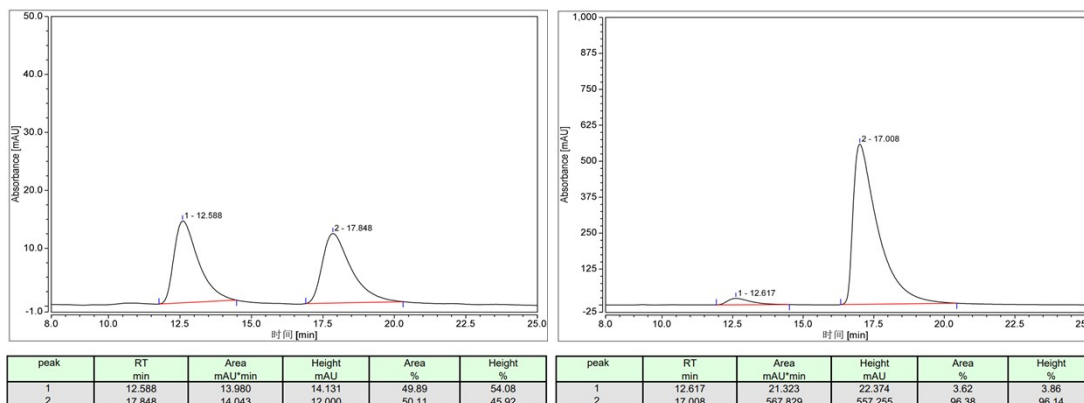

**(3*aR*,4*R*,5*R*,7*S*,7*aS*)-2-(3-(*tert*-butyl)-4'-methoxy-[1,1'-biphenyl]-4-yl)-5-(1-(isoquinolin-1-yl)naphthalen-2-yl)hexahydro-1*H*-4,7-methanoisindole-1,3(2*H*)-dione (7e)**

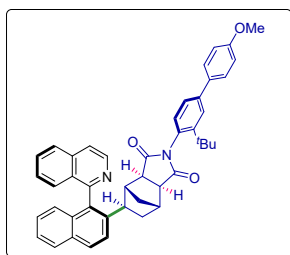

93% yield, white solid, **m.p.** = 139–141 °C. **<sup>1</sup>H NMR** (500 MHz, Chloroform-*d*) δ 8.74 (d, *J* = 5.7 Hz, 1H), 8.00 - 7.99 (m, 1H), 7.96 - 7.94 (m, 1H), 7.89 - 7.88 (m, 1H), 7.80 - 7.79 (m, 1H), 7.72 - 7.69 (m, 1H), 7.66 - 7.62 (m, 2H), 7.47 - 7.39 (m, 6H), 7.23 - 7.20 (m, 1H), 6.97 - 6.95 (m, 2H), 6.92 - 6.90 (m, 1H), 6.83 - 6.81 (m, 1H), 3.82 (s, 3H), 3.14 (s, 1H), 2.89 - 2.88 (m, 1H), 2.62 - 2.60 (m, 1H), 2.52 - 2.49 (m, 1H), 2.30 - 2.28 (m, 1H), 2.00 - 1.97 (m, 1H), 1.90 - 1.86 (m, 1H), 1.53 - 1.48 (m, 2H), 1.22 (s, 9H). **<sup>13</sup>C NMR** (126 MHz, CDCl<sub>3</sub>) δ 178.9, 178.6, 160.2, 159.5, 147.9, 142.6, 142.4, 140.8, 136.3, 135.1, 133.3, 133.0, 132.1, 130.7, 129.23, 129.20, 128.45, 128.41, 128.1, 127.9, 127.5, 127.1, 126.9, 126.6, 125.94, 125.85, 125.6, 122.8, 120.4, 114.3, 55.4, 49.8, 48.3, 44.9, 43.5, 40.8, 39.7, 35.6, 33.5, 31.6.

**HRMS (ESI):** Calculated for [C<sub>45</sub>H<sub>40</sub>N<sub>2</sub>NaO<sub>3</sub>, M+Na]<sup>+</sup>: 679.2931; Found: 679.2939.

**Optical Rotation:** [α]<sub>D</sub><sup>25</sup> = 16.3 ° (c = 1.0, CHCl<sub>3</sub>).

**IR** (neat, cm<sup>-1</sup>) = 2921, 1709, 1491, 1368, 1247, 1178, 1027, 806, 748, 623, 441.

**HPLC:** Daicel Chiralpak IA Column (*n*-Hexane/*i*-PrOH = 70 : 30, 1.0 mL/min), 30 °C, 254 nm, *R*<sub>t</sub> = 27.250 min (major) and 22.185 min (minor). 94% ee.

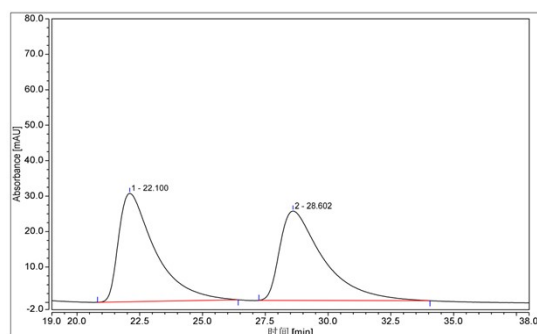

| peak | RT min | Area mAU*min | Height mAU | Area % | Height % |
|------|--------|--------------|------------|--------|----------|
| 1    | 22.100 | 51.392       | 30.576     | 50.45  | 54.81    |
| 2    | 28.602 | 50.479       | 25.209     | 49.55  | 45.19    |

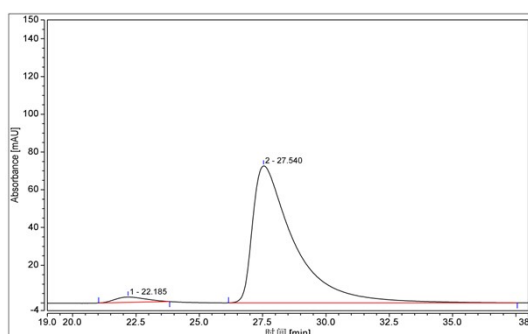

| peak | RT min | Area mAU*min | Height mAU | Area % | Height % |
|------|--------|--------------|------------|--------|----------|
| 1    | 22.185 | 3.971        | 2.629      | 2.80   | 3.75     |
| 2    | 27.540 | 137.790      | 72.560     | 97.20  | 96.25    |

(*ent*)-**7e**: 94% ee

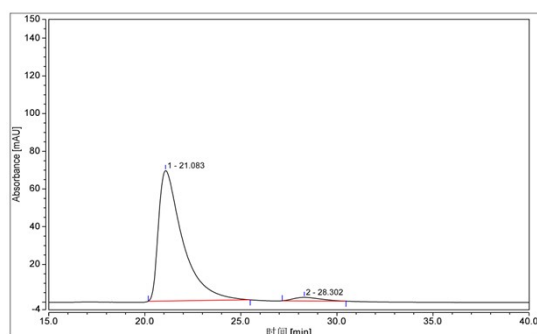

| peak | RT min | Area mAU*min | Height mAU | Area % | Height % |
|------|--------|--------------|------------|--------|----------|
| 1    | 21.083 | 100.640      | 69.170     | 97.07  | 97.38    |
| 2    | 28.302 | 3.034        | 1.858      | 2.93   | 2.62     |

**(3aR,4R,5R,7S,7aS)-2-(2-(*tert*-butyl)-4-(furan-3-yl)phenyl)-5-(1-(isoquinolin-1-yl)naphthalen-2-yl)hexahydro-1*H*-4,7-methanoisindole-1,3(2*H*)-dione (7f)**

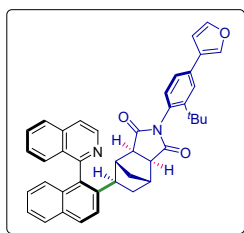

99% yield, white solid, **m.p.** = 153–155 °C. <sup>1</sup>H NMR (500 MHz, Chloroform-*d*) δ 8.74 (d, *J* = 5.7 Hz, 1H), 8.01 - 7.99 (m, 1H), 7.97 - 7.95 (m, 1H), 7.90 - 7.88 (m, 1H), 7.832 - 7.828 (m, 1H), 7.80 - 7.79 (m, 1H), 7.73 - 7.70 (m, 1H), 7.63 - 7.61 (m, 1H), 7.54 - 7.52 (m, 1H), 7.46 - 7.38 (m, 4H), 7.24 - 7.21 (m, 1H), 6.92 - 6.90 (m, 1H), 6.79 - 6.77 (m, 1H), 6.654 - 6.648 (m, 1H), 6.46 - 6.45 (m, 1H), 3.12 (s, 1H), 2.88 - 2.87 (m, 1H), 2.60 - 2.59 (m, 1H), 2.51 - 2.48 (m, 1H), 2.28 - 2.27 (m, 1H), 1.99 - 1.97 (m, 1H), 1.90 - 1.85 (m, 1H), 1.52 - 1.46 (m, 2H), 1.22 (s, 9H). <sup>13</sup>C NMR (126 MHz, CDCl<sub>3</sub>) δ 178.8, 178.4, 160.2, 153.3, 148.2, 142.5, 140.7, 136.3, 135.0, 133.0, 132.1, 130.8, 130.7, 129.6, 129.2, 128.4, 128.1, 127.9, 127.1, 126.9, 126.5, 125.8, 125.5, 124.1, 122.9, 122.8, 120.4, 111.8, 106.0, 49.8, 48.3, 44.9, 43.4, 40.7, 39.6, 35.6, 33.4, 31.5.

**HRMS (ESI):** Calculated for [C<sub>42</sub>H<sub>36</sub>N<sub>2</sub>NaO<sub>3</sub>, M+Na]<sup>+</sup>: 639.2618; Found: 639.2624.

**Optical Rotation:** [α]<sub>D</sub><sup>25</sup> = 23.4° (c = 1.0, CHCl<sub>3</sub>).

**IR** (neat, cm<sup>-1</sup>) = 1711, 1376, 1180, 1013, 806, 747, 695, 623, 591, 490, 444.

**HPLC:** Daicel Chiralpak IA Column (*n*-Hexane/*i*-PrOH = 70 : 30, 1.0 mL/min), 30 °C, 254 nm, *R*<sub>t</sub> = 20.808 min (major) and 15.633 min (minor). 97% ee.

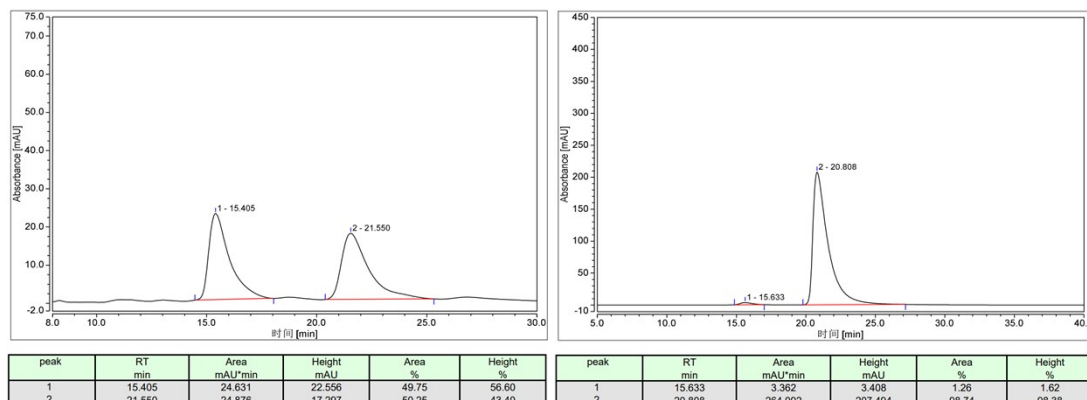

**(3aR,4R,5R,7S,7aS)-2-(4-bromo-2-(*tert*-butyl)phenyl)-5-(1-(isoquinolin-1-yl)naphthalen-2-yl)hexahydro-1*H*-4,7-methanoisindole-1,3(2*H*)-dione (7g)**

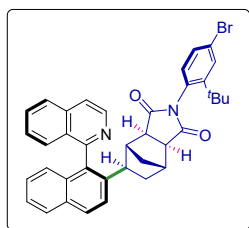

43% yield, white solid, **m.p.** = 143–145 °C. <sup>1</sup>H NMR (500 MHz, Chloroform-*d*) δ 8.74 (d, *J* = 5.8 Hz, 1H), 8.01 - 7.99 (m, 1H), 7.97 - 7.96 (m, 1H), 7.90 - 7.88 (m, 1H), 7.81 - 7.80 (m, 1H), 7.74 - 7.70 (m, 1H), 7.64 -

7.63 (m, 1H), 7.62 - 7.60 (m, 1H), 7.46 - 7.37 (m, 4H), 7.24 - 7.21 (m, 1H), 6.91 - 6.89 (m, 1H), 6.64 - 6.63 (m, 1H), 3.09 (s, 1H), 2.87 - 2.86 (m, 1H), 2.60 - 2.58 (m, 1H), 2.49 - 2.46 (m, 1H), 2.26 - 2.25 (m, 1H), 1.99 - 1.96 (m, 1H), 1.90 - 1.85 (m, 1H), 1.51 - 1.47 (m, 1H), 1.42 - 1.40 (m, 1H), 1.16 (s, 9H). <sup>13</sup>C NMR (126 MHz, CDCl<sub>3</sub>) δ 178.5, 178.2, 160.1, 150.1, 142.4, 140.6, 136.3, 134.9, 133.0, 132.1, 132.0, 130.8, 130.6, 129.9, 129.2, 128.4, 128.1, 127.9, 127.1, 126.9, 126.6, 125.8, 125.6, 124.1, 122.7, 120.5, 49.8, 48.3, 44.9, 43.4, 40.7, 39.5, 35.7, 33.4, 31.3.

**HRMS (ESI):** Calculated for [C<sub>38</sub>H<sub>33</sub>BrN<sub>2</sub>NaO<sub>2</sub>, M+Na]<sup>+</sup>: 651.1618; Found: 651.1627.

**Optical Rotation:** [α]<sub>D</sub><sup>25</sup> = 5.8° (c = 1.0, CHCl<sub>3</sub>).

**IR** (neat, cm<sup>-1</sup>) = 1711, 1484, 1390, 1365, 1178, 804, 747, 694, 622, 589, 492.

**HPLC:** Daicel Chiralpak IA Column (*n*-Hexane/*i*-PrOH = 70 : 30, 1.0 mL/min), 30 °C, 254 nm, R<sub>t</sub> = 19.480 min (major) and 11.273 min (minor). 96% ee.

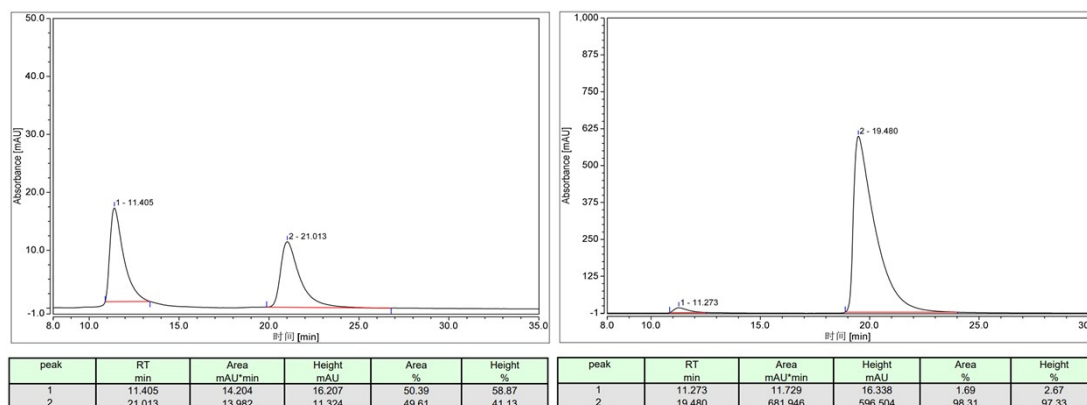

**methyl 5-(3-chlorophenyl)-1-((3*aR*,4*R*,5*R*,7*S*,7*aS*)-5-(1-(isoquinolin-1-yl)naphthalen-2-yl)-1,3-dioxooctahydro-2*H*-4,7-methanoisoindol-2-yl)-2-methyl-1*H*-pyrrole-3-carboxylate (7h)**

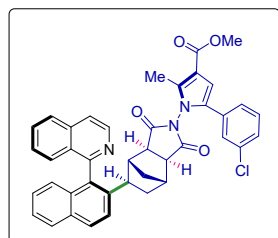

83% yield, white solid, **m.p.** = 165–167 °C. <sup>1</sup>H NMR (500 MHz, Chloroform-d) δ 8.72 (d, *J* = 5.8 Hz, 1H), 7.99 - 7.94 (m, 2H), 7.89 - 7.87 (m, 1H), 7.79 - 7.78 (m, 1H), 7.72 - 7.69 (m, 1H), 7.58 - 7.56 (m, 1H), 7.44 - 7.39 (m, 2H), 7.36 - 7.34 (m, 1H), 7.23 - 7.19 (m, 2H), 7.17 - 7.12 (m, 2H), 6.98 - 6.97 (m, 1H), 6.91 - 6.89 (m, 1H), 6.67 (s, 1H), 3.80 (s, 3H), 2.99 (s, 1H), 2.83 - 2.82 (m, 1H), 2.47 - 2.43 (m, 2H), 2.38 (s, 3H), 2.05 - 2.00 (m, 2H), 1.94 - 1.89 (m, 1H), 1.51 - 1.46 (m, 2H). <sup>13</sup>C NMR (126 MHz, CDCl<sub>3</sub>) δ 173.7, 173.3, 164.8, 160.0, 142.6, 140.0, 137.1, 136.3, 135.2, 134.5, 133.0, 132.2, 131.7, 131.6, 130.7, 129.9, 129.2, 128.4, 128.2, 128.09, 128.06, 127.9, 127.2, 126.8, 126.7, 126.0, 125.9, 125.7, 122.6, 120.5, 112.5, 109.7, 51.2, 47.7, 46.3, 44.3, 43.2, 40.1, 39.2, 33.3, 10.8.

**HRMS (ESI):** Calculated for [C<sub>41</sub>H<sub>32</sub>ClN<sub>3</sub>NaO<sub>4</sub>, M+Na]<sup>+</sup>: 688.1974; Found: 688.1984.

**Optical Rotation:** [α]<sub>D</sub><sup>25</sup> = -18.9° (c = 1.0, CHCl<sub>3</sub>).

**IR** (neat, cm<sup>-1</sup>) = 1738, 1707, 1583, 1438, 1397, 1243, 1200, 1074, 822, 802, 774, 748, 694, 632, 442.

**HPLC:** Daicel Chiralpak IA Column (*n*-Hexane/*i*-PrOH = 70 : 30, 1.0 mL/min), 30 °C, 254 nm, R<sub>t</sub> = 26.473

min (major) and 23.157 min (minor). 90% ee.

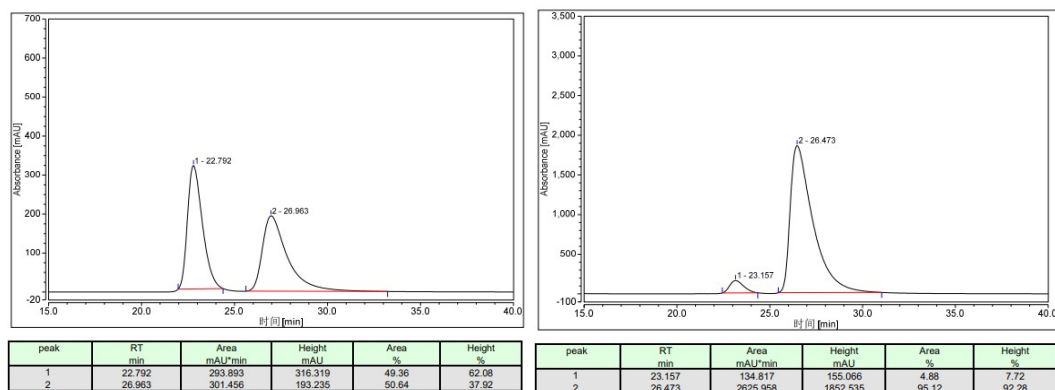

**methyl 1-((3*aR*,4*R*,5*R*,7*S*,7*aS*)-5-(1-(isoquinolin-1-yl)naphthalen-2-yl)-1,3-dioxooctahydro-2*H*-4,7-methanoisoindol-2-yl)-2-methyl-5-phenyl-1*H*-pyrrole-3-carboxylate (7i)**

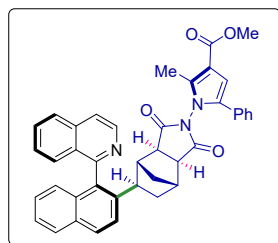

54% yield, white solid, **m.p.** = 157–158 °C. <sup>1</sup>H NMR (500 MHz, Chloroform-*d*) δ 8.71 - 8.70 (m, 1H), 7.98 - 7.92 (m, 2H), 7.88 - 7.86 (m, 1H), 7.77 - 7.76 (m, 1H), 7.70 - 7.67 (m, 1H), 7.58 - 7.56 (m, 1H), 7.42 - 7.37 (m, 2H), 7.34 - 7.32 (m, 1H), 7.22 - 7.18 (m, 4H), 7.12 - 7.10 (m, 2H), 6.88 - 6.87 (m, 1H), 6.65 (s, 1H), 3.79 (s, 3H), 3.01 (s, 1H), 2.81 - 2.80 (m, 1H), 2.46 - 2.41 (m, 2H), 2.39 (s, 3H), 2.05 - 1.99 (m, 2H), 1.91 - 1.87 (m, 1H), 1.53 - 1.50 (m, 1H), 1.47 - 1.43 (m, 1H). <sup>13</sup>C NMR (126 MHz, CDCl<sub>3</sub>) δ 173.8, 173.4, 165.0, 160.0, 142.6, 140.1, 136.5, 136.3, 135.2, 133.1, 133.0, 132.2, 130.7, 130.0, 129.2, 128.6, 128.4, 128.2, 128.12, 128.06, 127.9, 127.2, 126.8, 126.6, 125.9, 125.7, 122.6, 120.5, 112.3, 108.9, 51.2, 47.7, 46.4, 44.2, 43.3, 40.0, 39.4, 33.3, 10.8.

**HRMS (ESI):** Calculated for [C<sub>41</sub>H<sub>34</sub>N<sub>3</sub>O<sub>4</sub>, M+H]<sup>+</sup>: 632.2544; Found: 632.2552.

**Optical Rotation:** [α]<sub>D</sub><sup>25</sup> = 9.000° (c = 1.0, CHCl<sub>3</sub>).

**IR** (neat, cm<sup>-1</sup>) = 1738, 1704, 1439, 1398, 1241, 1199, 1072, 802, 749, 696, 632, 443.

**HPLC:** Daicel Chiralpak IA Column (*n*-Hexane/*i*-PrOH = 70 : 30, 1.0 mL/min), 30 °C, 254 nm, *R*<sub>t</sub> = 39.465 min (major) and 18.458 min (minor). 93% ee.



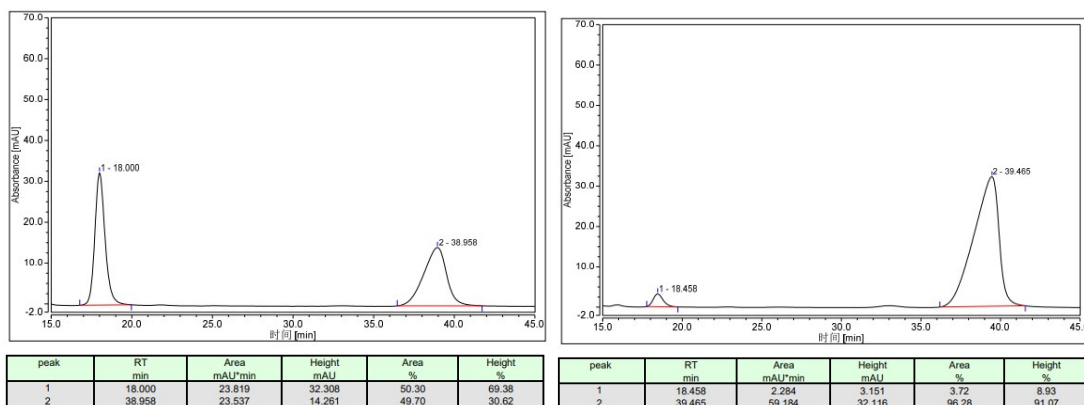

**(3*aR*,4*R*,5*R*,7*S*,7*aS*)-2-(2-(*tert*-butyl)phenyl)-5-(1-(isoquinolin-1-yl)-4-methylnaphthalen-2-yl)hexahydro-1*H*-4,7-methanoisoindole-1,3(2*H*)-dione (7j)**

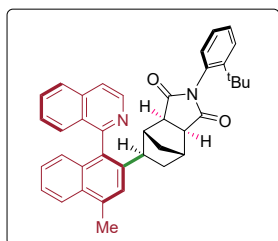

82% yield, white solid, **m.p.** = 133–135 °C. <sup>1</sup>H NMR (500 MHz, Chloroform-*d*) δ 8.73 (d, *J* = 5.8 Hz, 1H), 8.05 - 8.03 (m, 1H), 7.94 - 7.93 (m, 1H), 7.78 - 7.76 (m, 1H), 7.70 - 7.67 (m, 1H), 7.52 - 7.51 (m, 1H), 7.45 - 7.40 (m, 4H), 7.36 - 7.33 (m, 1H), 7.27 - 7.25 (m, 1H), 7.23 - 7.20 (m, 1H), 6.93 - 6.91 (m, 1H), 6.78 - 6.77 (m, 1H), 3.12 (s, 1H), 2.87 - 2.86 (m, 1H), 2.81 (s, 3H), 2.59 - 2.58 (m, 1H), 2.47 - 2.43 (m, 1H), 2.27 - 2.26 (m, 1H), 2.00 - 1.98 (m, 1H), 1.88 - 1.85 (m, 1H), 1.50 - 1.46 (m, 2H), 1.18 (s, 9H). <sup>13</sup>C NMR (126 MHz, CDCl<sub>3</sub>) δ 178.9, 178.5, 160.5, 147.8, 142.6, 140.3, 136.3, 135.5, 133.4, 133.1, 131.3, 130.7, 130.6, 130.4, 129.8, 128.7, 128.6, 128.0, 127.4, 127.1, 127.0, 126.5, 126.2, 125.4, 124.1, 123.6, 120.3, 49.8, 48.3, 44.8, 43.4, 40.7, 39.7, 35.5, 33.5, 31.5, 20.1.

**HRMS (ESI):** Calculated for [C<sub>39</sub>H<sub>36</sub>N<sub>2</sub>NaO<sub>2</sub>, M+Na]<sup>+</sup>: 587.2669; Found: 587.2678.

**Optical Rotation:** [α]<sub>D</sub><sup>25</sup> = -25.5° (c = 1.0, CHCl<sub>3</sub>).

**IR** (neat, cm<sup>-1</sup>) = 2963, 1709, 1442, 1369, 1181, 812, 753, 692, 621, 463.

**HPLC:** Daicel Chiralpak IC Column (*n*-Hexane/*i*-PrOH = 70 : 30, 1.0 mL/min), 30 °C, 254 nm, *R*<sub>t</sub> = 14.585 min (major) and 12.542 min (minor). 95% ee.

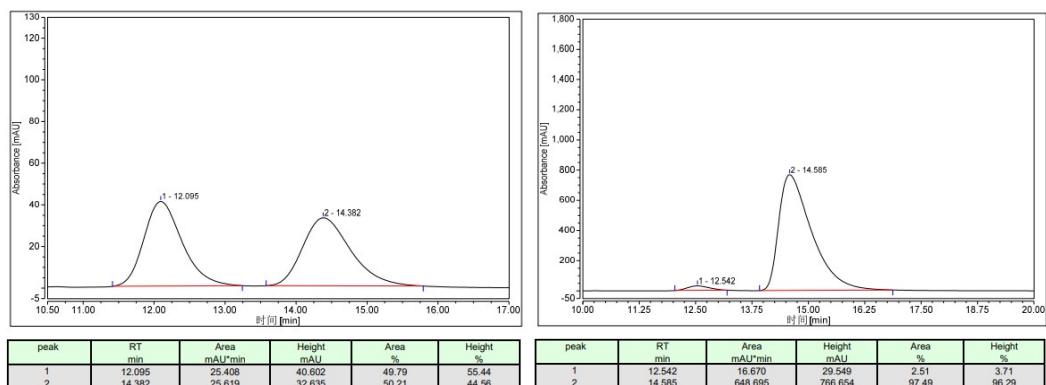

**(3*aR*,4*R*,5*R*,7*S*,7*aS*)-2-(2-(*tert*-butyl)phenyl)-5-(1-(3-methylpyridin-2-yl)naphthalen-2-yl)hexahydro-1*H*-4,7-methanoisoindole-1,3(2*H*)-dione (7k)**

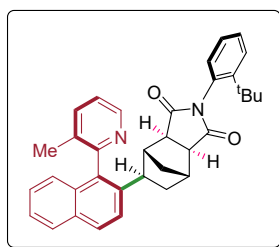

74% yield, white solid, **m.p.** = 196–198 °C. <sup>1</sup>H NMR (500 MHz, Chloroform-*d*) δ 8.64 (d, *J* = 4.8 Hz, 1H), 7.91 - 7.89 (m, 1H), 7.86 - 7.84 (m, 1H), 7.72 - 7.70 (m, 1H), 7.56 - 7.54 (m, 2H), 7.43 - 7.31 (m, 4H), 7.30 - 7.26 (m, 1H), 7.03 - 7.01 (m, 1H), 6.81 - 6.79 (m, 1H), 3.06 (s, 1H), 2.93 - 2.92 (m, 1H), 2.76 - 2.74 (m, 1H), 2.64 - 2.61 (m, 1H), 2.59 - 2.57 (m, 1H), 1.99 - 1.96 (m, 4H), 1.90 - 1.87 (m, 1H), 1.66 - 1.61 (m, 1H), 1.50 - 1.47 (m, 1H), 1.25 (s, 9H). <sup>13</sup>C NMR (126 MHz, CDCl<sub>3</sub>) δ 178.9, 178.5, 158.0, 147.8, 147.4, 139.6, 138.1, 136.3, 133.0, 132.2, 132.0, 130.7, 130.4, 129.8, 128.8, 128.7, 128.0, 127.5, 126.6, 125.5, 125.2, 123.1, 122.7, 50.2, 48.4, 45.3, 43.3, 40.7, 39.0, 35.6, 33.2, 31.6, 18.8.

**HRMS (ESI):** Calculated for [C<sub>35</sub>H<sub>34</sub>N<sub>2</sub>NaO<sub>2</sub>, M+Na]<sup>+</sup>: 537.2512; Found: 537.2521.

**Optical Rotation:** [α]<sub>D</sub><sup>25</sup> = 50.8° (c = 1.0, CHCl<sub>3</sub>).

**IR** (neat, cm<sup>-1</sup>) = 2921, 1709, 1444, 1371, 1171, 807, 756, 584.

**HPLC:** Daicel Chiralpak IA Column (*n*-Hexane/*i*-PrOH = 70 : 30, 1.0 mL/min), 30 °C, 254 nm, *R*<sub>t</sub> = 9.420 min (major) and 8.005 min (minor). 97% ee.

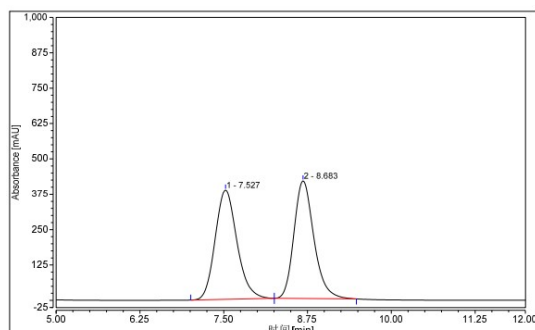

| peak | RT min | Area mAU*min | Height mAU | Area % | Height % |
|------|--------|--------------|------------|--------|----------|
| 1    | 7.527  | 145.725      | 386.033    | 50.35  | 48.15    |
| 2    | 8.683  | 143.695      | 415.636    | 49.65  | 51.85    |

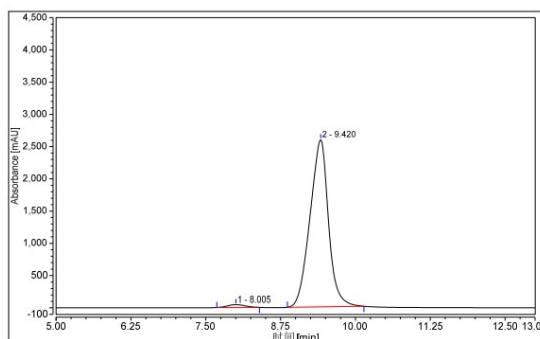

| peak | RT min | Area mAU*min | Height mAU | Area % | Height % |
|------|--------|--------------|------------|--------|----------|
| 1    | 8.005  | 14.950       | 43.691     | 1.59   | 1.66     |
| 2    | 9.420  | 927.999      | 2591.891   | 98.41  | 98.34    |

### Scheme S1. Unsuccessful substrates

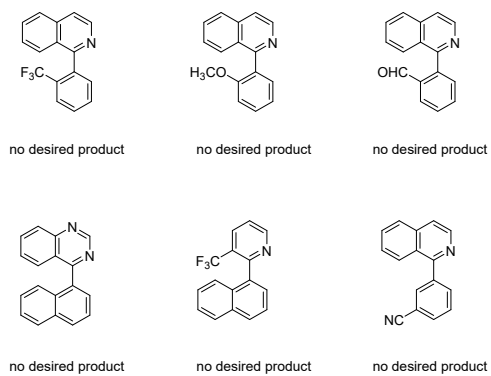

Several substrates (Scheme S1) were tested in this reaction without success. Studies are ongoing to find solutions for these problematic substrates.

## VIII. Gram-scale reaction and synthetic transformations

### 1. Gram-Scale Preparation:

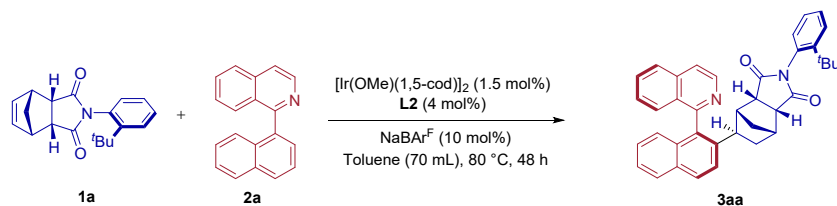

To an flame-dried 250 mL Schlenk tube containing a stirring bar was charged with  $[\text{Ir}(\text{OMe})(1,5\text{-cod})]_2$  (0.05 mmol, 35 mg), **L2** (0.14 mmol, 95 mg) and 35 mL dry toluene in a nitrogen-filled glove-box, the mixture was stirred for 20 min at room temperature. Then **1a** (3.5 mmol, 1.03 g, 1.0 equiv.), **2a** (4.2 mmol, 1.07 g, 1.2 equiv.), NaBARF (0.35 mmol, 310 mg) and another 35 mL dry toluene were added sequentially. The mixture was stirred at 80 °C for 48 hours, concentrated to dryness and the crude mixture was purified by flash column chromatography on silica gel using a mixture of Hexane/EtOAc (3/1, v/v) as eluent to obtain the desired product **3aa** in 99% isolated yield (1.91 g) with 96% ee.

**HPLC:** Daicel Chiralpak IC Column (*n*-Hexane/*i*-PrOH = 70 : 30, 1.0 mL/min), 30 °C, 254 nm,  $R_t$  = 11.675 min (major) and 8.972 min (minor).

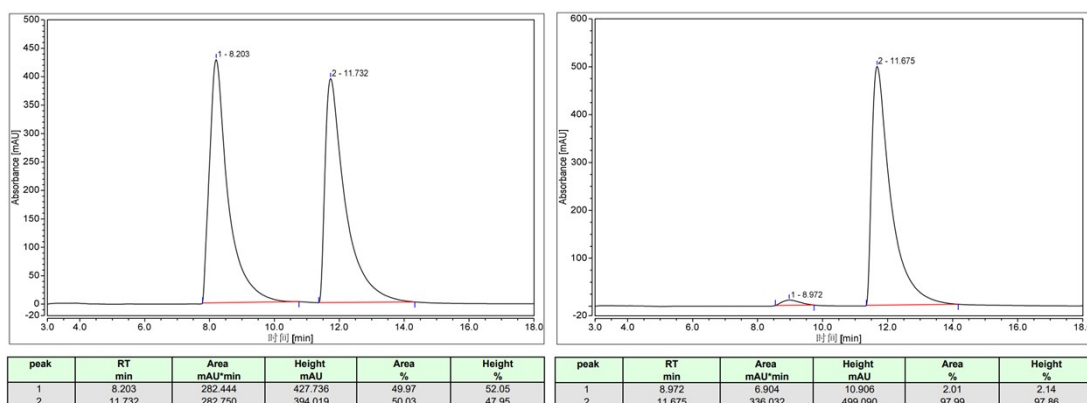

### 2. Synthetic transformations

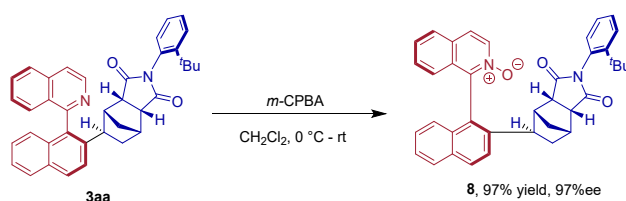

The following reaction was carried out by the published procedures<sup>[7]</sup>. To a solution of the substituted isoquinoline **3aa** (96% ee, 110.1 mg, 0.2 mmol) in  $\text{CH}_2\text{Cl}_2$  (2 mL) was added *m*-chloroperoxybenzoic acid (69 mg, 0.4 mmol) at 0 °C. The reaction mixture was stirred at room temperature for 4 hours. Then the reaction mixture was quenched with saturated  $\text{Na}_2\text{CO}_3$  aqueous solution and extracted with  $\text{CH}_2\text{Cl}_2$  (3 × 20 mL). The combined organic layers were washed with brine, dried over  $\text{Na}_2\text{SO}_4$  and filtrated. The solvent was removed under reduced pressure and the residue was purified by silica gel column chromatography ( $\text{CH}_2\text{Cl}_2/\text{EtOAc}$  1:1, v/v) to afford product **8** as a white solid (110.0 mg, 97% yield).

**1-(2-((3a*S*,4*R*,5*R*,7*S*,7a*R*)-2-(2-(*tert*-butyl)phenyl)-1,3-dioxooctahydro-1*H*-4,7-methanoisoindol-5-yl)naphthalen-1-yl)isoquinoline 2-oxide (8)**

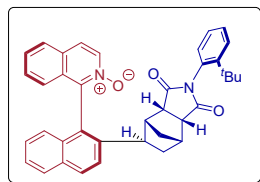

97% yield, white solid, **m.p.** = 186–188 °C. **<sup>1</sup>H NMR** (500 MHz, CDCl<sub>3</sub>) δ 8.28 - 8.27 (m, 1H), 8.09 - 8.07 (m, 1H), 7.98 - 7.93 (m, 2H), 7.81 - 7.79 (m, 1H), 7.76 - 7.74 (m, 1H), 7.58 - 7.52 (m, 2H), 7.47 - 7.44 (m, 1H), 7.41 - 7.35 (m, 2H), 7.32 - 7.30 (m, 1H), 7.20 - 7.17 (m, 1H), 7.05 - 7.04 (m, 1H), 6.94 - 6.93 (m, 1H), 5.78 - 5.76 (m, 1H), 3.21 - 3.18 (m, 2H), 3.14 - 3.13 (m, 1H), 3.04 - 3.01 (m, 1H), 2.96 - 2.94 (m, 1H), 2.36 - 2.31 (m, 1H), 2.21 - 2.19 (m, 1H), 1.74 - 1.69 (m, 2H), 1.22 (s, 9H). **<sup>13</sup>C NMR** (126 MHz, CDCl<sub>3</sub>) δ 177.9, 177.2, 147.8, 145.1, 142.2, 137.7, 132.4, 131.9, 130.4, 130.2, 130.1, 129.9, 129.7, 129.4, 129.2, 129.0, 128.8, 128.3, 127.6, 127.4, 127.3, 127.1, 126.0, 124.9, 124.5, 124.2, 123.5, 48.8, 48.7, 44.0, 40.7, 39.8, 39.7, 35.6, 33.1, 31.6.

**HRMS (ESI):** Calculated for [C<sub>38</sub>H<sub>35</sub>N<sub>2</sub>O<sub>3</sub>, M+H]<sup>+</sup>: 567.2642; Found: 567.2653.

**Optical Rotation:** [α]<sub>D</sub><sup>25</sup> = -187.6° (c = 1.0, CHCl<sub>3</sub>).

**IR** (neat, cm<sup>-1</sup>) = 1705, 1441, 1366, 1318, 1224, 1170, 814, 744, 608, 511, 442.

**HPLC:** Daicel Chiralcel OD-H Column (*n*-Hexane/*i*-PrOH = 70 : 30, 1.0 mL/min), 30 °C, 254 nm, *R*<sub>t</sub> = 30.453 min (major) and 15.405 min (minor). 97% ee.

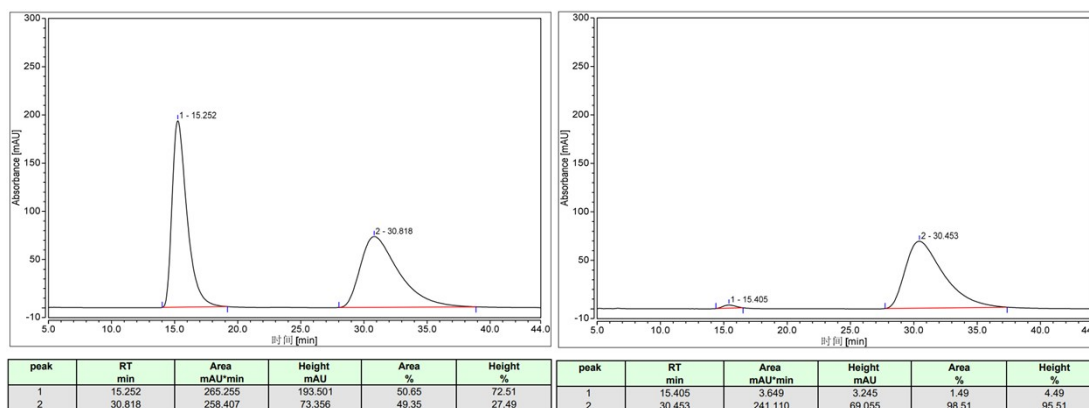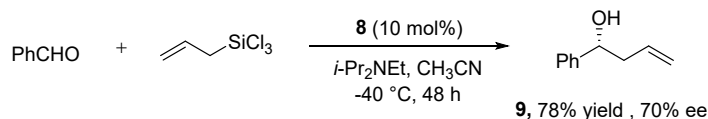

The following reaction was carried out by the published procedures<sup>[7]</sup>. The catalyst was recovered in 83% yield without racemization. Allyltrichlorosilane (69.5 μL, 0.48 mmol) was added dropwise to a solution of catalyst **8** (97% ee, 23 mg, 0.04 mmol), *i*-Pr<sub>2</sub>NEt (82.6 μL, 0.5 mmol), and benzaldehyde (41 μL, 0.4 mmol) in MeCN (2 mL) under argon at -40 °C. The reaction mixture was stirred at -40 °C for 48 h. The reaction was quenched with saturated aqueous NaHCO<sub>3</sub> (5 mL) and diluted with water. The aqueous layer was extracted with DCM (3 × 5 mL). The combined organic extracts were washed with brine (5 mL) and dried over Na<sub>2</sub>SO<sub>4</sub>. The solvent was removed in vacuo. The residue was purified by column chromatography on silica gel with a petroleum

ether/ethyl acetate mixture (20:1) to afford **9** as a colorless oil (46.5 mg, 78% yield, 70% ee).

<sup>1</sup>H NMR (500 MHz, CDCl<sub>3</sub>) δ 7.33 - 7.32 (m, 4H), 7.27 - 7.23 (m, 1H), 5.82 - 5.74 (m, 1H), 5.15 - 5.10 (m, 2H), 4.70 - 4.67 (m, 1H), 2.53 - 2.47 (m, 2H), 2.45 - 2.34 (m, 1H).

**Optical Rotation:**  $[\alpha]_{D}^{25} = 36.8^{\circ}$  (c = 1.0, CHCl<sub>3</sub>).

**IR** (neat, cm<sup>-1</sup>) = 3353, 2924, 1641, 1493, 1453, 1045, 986, 913, 870, 756, 698, 608, 537.

**HPLC:** Daicel Chiralcel OD-H Column (*n*-Hexane/*i*-PrOH = 95 : 5, 1.0 mL/min), 30 °C, 210 nm, *R*<sub>t</sub> = 15.533 min (major) and 16.687 min (minor). 70% ee.

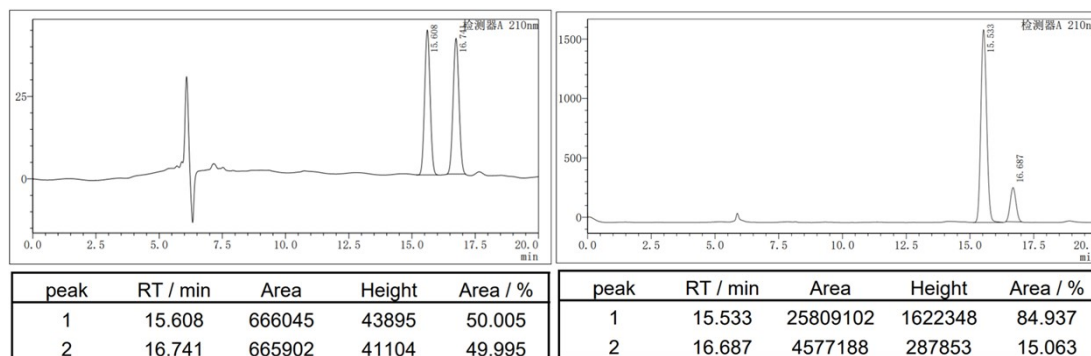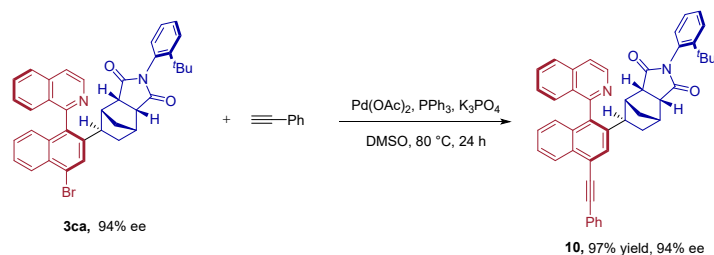

The following reaction was carried out by the published procedures.<sup>[8]</sup> To a reaction tube equipped with a stir bar were charged with **3ca** (63.0 mg, 0.1 mmol), DMSO (1 mL), Pd(OAc)<sub>2</sub> (1.1 mg, 0.005 mmol), PPh<sub>3</sub> (5.2 mg, 0.02 mmol), K<sub>3</sub>PO<sub>4</sub> (25.5 mg, 0.12 mmol) and ethynylbenzene (16.5 μL, 0.15 mmol). The tube was then sealed, and the resulting mixture was stirred at 80 °C for 24 h under argon atmosphere. Upon completion, it was diluted with ethyl acetate (20 mL) and washed with water and brine. The organic layer was dried over anhydrous Na<sub>2</sub>SO<sub>4</sub>, filtered and concentrated under reduced pressure. The residue was purified by column chromatography on silica gel with petroleum ether/ethyl acetate (5:1) as the eluent to give **10** as a white solid (62.9 mg, 97% yield).

**(3aS,4R,5R,7S,7aR)-2-(2-(tert-butyl)phenyl)-5-(1-(isoquinolin-1-yl)-4-(phenylethynyl)naphthalen-2-yl)hexahydro-1H-4,7-methanoisoindole-1,3(2H)-dione (10)**

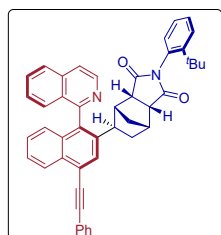

97% yield, white solid, **m.p.** = 163–165 °C. <sup>1</sup>H NMR (500 MHz, CDCl<sub>3</sub>) δ 8.74 (d, *J* = 5.8 Hz, 1H), 8.56 -

8.54 (m, 1H), 8.03 - 8.02 (m, 2H), 7.84 - 7.83 (m, 1H), 7.78 - 7.76 (m, 2H), 7.71 - 7.68 (m, 1H), 7.53 - 7.36 (m, 8H), 7.27 - 7.25 (m, 1H), 7.18 - 7.14 (m, 1H), 6.82 - 6.80 (m, 1H), 5.45 - 5.43 (m, 1H), 3.20 - 3.17 (m, 3H), 3.06 - 3.03 (m, 1H), 2.95 - 2.93 (m, 1H), 2.37 - 2.35 (m, 1H), 2.11 - 2.07 (m, 1H), 1.81 - 1.79 (m, 1H), 1.76 - 1.71 (m, 1H), 1.21 (s, 9H). <sup>13</sup>C NMR (126 MHz, CDCl<sub>3</sub>) δ 178.0, 176.8, 159.3, 147.7, 142.8, 140.5, 136.5, 136.4, 133.2, 132.0, 131.8, 130.9, 130.4, 130.1, 129.3, 128.70, 128.68, 128.6, 128.3, 128.1, 127.7, 127.2, 127.12, 127.06, 126.6, 126.5, 126.3, 126.2, 123.3, 121.9, 120.6, 94.7, 87.9, 49.0, 48.6, 44.3, 41.4, 39.6, 39.3, 36.1, 35.6, 31.6.

**HRMS (ESI):** Calculated for [C<sub>46</sub>H<sub>39</sub>N<sub>2</sub>O<sub>2</sub>, M+H]<sup>+</sup>: 651.3006; Found: 651.3015.

**Optical Rotation:** [α]<sub>D</sub><sup>25</sup> = -112.9° (c = 1.0, CHCl<sub>3</sub>).

**IR** (neat, cm<sup>-1</sup>) = 2961, 1709, 1488, 1440, 1366, 1172, 827, 753, 690, 618.

**HPLC:** Daicel Chiralpak IA Column (*n*-Hexane/*i*-PrOH = 70 : 30, 1.0 mL/min), 30 °C, 254 nm, R<sub>t</sub> = 9.517 min (major) and 18.202 min (minor). 93% ee.

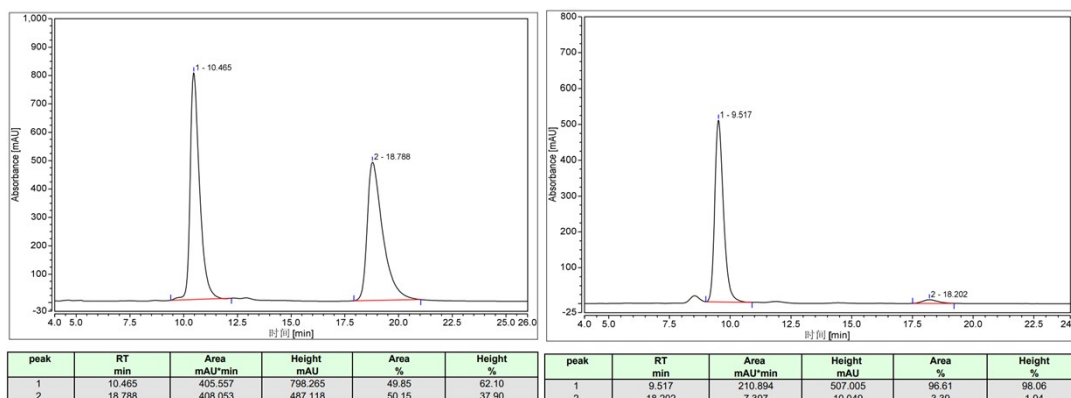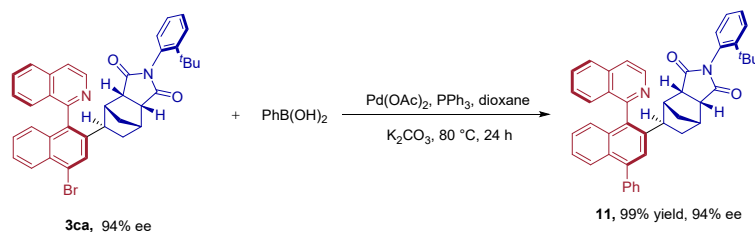

The following reaction was carried out by the published procedures.<sup>[8]</sup> To a reaction tube equipped with a stir bar were charged with **3ca** (63.0 mg, 0.1 mmol), dioxane (1 mL), Pd(OAc)<sub>2</sub> (2.2 mg, 0.01 mmol), PPh<sub>3</sub> (15.7 mg, 0.06 mmol), K<sub>2</sub>CO<sub>3</sub> (55.3 mg, 0.4 mmol) and phenylboronic acid (13.4 mg, 0.11 mmol). The tube was then sealed, and the resulting mixture was stirred at 80 °C for 24 h under argon atmosphere. Upon completion, it was diluted with ethyl acetate (20 mL) and washed with water and brine. The organic layer was dried over anhydrous Na<sub>2</sub>SO<sub>4</sub>, filtered and concentrated under reduced pressure. The residue was purified by column chromatography on silica gel with petroleum ether/ethyl acetate (5:1) as the eluent to give **11** as a white solid (62.5 mg, 99% yield).

**(3aS,4R,5R,7S,7aR)-2-(2-(tert-butyl)phenyl)-5-(1-(isoquinolin-1-yl)-4-phenylnaphthalen-2-yl)hexahydro-1H-4,7-methanoisindole-1,3(2H)-dione (11)**

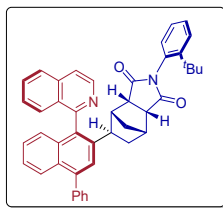

99% yield, white solid, **m.p.** = 257–259 °C. **<sup>1</sup>H NMR** (500 MHz, CDCl<sub>3</sub>) δ 8.76 (d, *J* = 5.8 Hz, 1H), 8.06 - 8.05 (m, 1H), 7.95 - 7.93 (m, 1H), 7.86 - 7.85 (m, 1H), 7.74 - 7.71 (m, 1H), 7.67 - 7.59 (m, 5H), 7.55 - 7.50 (m, 3H), 7.46 - 7.43 (m, 1H), 7.38 - 7.35 (m, 2H), 7.23 - 7.20 (m, 1H), 7.17 - 7.14 (m, 1H), 6.85 - 6.83 (m, 1H), 5.43 - 5.41 (m, 1H), 3.19 - 3.18 (m, 3H), 3.10 - 3.07 (m, 1H), 2.91 - 2.90 (m, 1H), 2.32 - 2.30 (m, 1H), 2.16 - 2.11 (m, 1H), 1.76 - 1.69 (m, 2H), 1.21 (s, 9H). **<sup>13</sup>C NMR** (126 MHz, CDCl<sub>3</sub>) δ 178.0, 176.9, 160.0, 147.7, 142.9, 141.2, 141.1, 140.2, 136.5, 135.1, 133.6, 130.9, 130.45, 130.39, 130.2, 130.1, 129.3, 128.7, 128.49, 128.46, 128.0, 127.6, 127.2, 127.1, 126.9, 126.4, 126.2, 126.0, 125.6, 124.3, 120.5, 49.0, 48.7, 44.3, 41.5, 39.54, 39.46, 36.1, 35.6, 31.7.

**HRMS (ESI):** Calculated for [C<sub>44</sub>H<sub>39</sub>N<sub>2</sub>O<sub>2</sub>, M+H]<sup>+</sup>: 627.3006; Found: 627.3019.

**Optical Rotation:** [α]<sub>D</sub><sup>25</sup> = -106.6° (c = 1.0, CHCl<sub>3</sub>).

**IR** (neat, cm<sup>-1</sup>) = 2921, 1708, 1441, 1368, 1178, 754, 707, 614.

**HPLC:** Daicel Chiralcel OX-H Column (*n*-Hexane/*i*-PrOH = 70 : 30, 1.0 mL/min), 30 °C, 254 nm, *R*<sub>t</sub> = 11.787 min (major) and 7.220 min (minor). 94% ee.

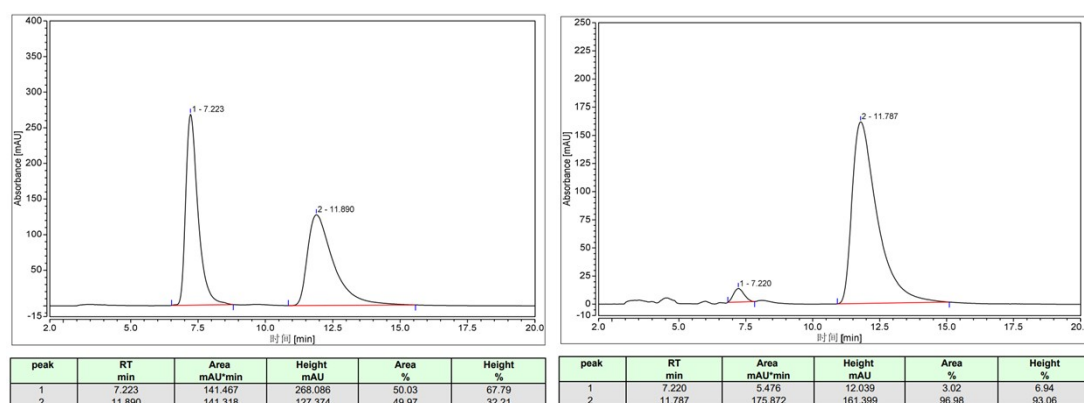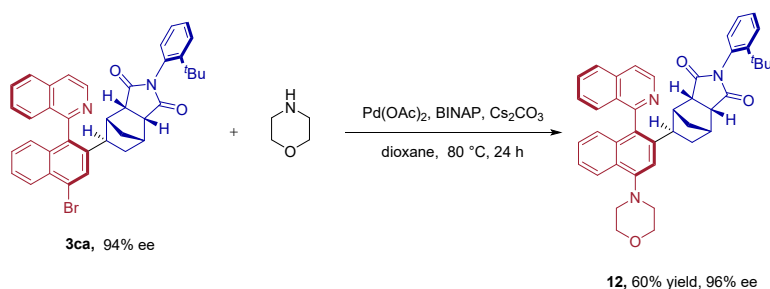

The following reaction was carried out by the published procedures.<sup>[8]</sup> To a reaction tube equipped with a stir bar were charged with **3ca** (63.0 mg, 0.1 mmol), dioxane (1 mL), Pd(OAc)<sub>2</sub> (5.6 mg, 0.025 mmol), BINAP (18.7 mg, 0.03 mmol), Cs<sub>2</sub>CO<sub>3</sub> (91.2 mg, 0.28 mmol) and morpholine (70 μL, 0.8 mmol). The tube was then sealed, and the resulting mixture was stirred at 80 °C for 24 h under argon atmosphere. Upon completion, it was quenched with water, extracted with CH<sub>2</sub>Cl<sub>2</sub>, and washed with brine. The organic layer was dried over



anhydrous Na<sub>2</sub>SO<sub>4</sub>, filtered and concentrated under reduced pressure. The residue was purified by column chromatography on silica gel with petroleum ether/ethyl acetate (5:1) as the eluent to give **12** as a white solid (38.1 mg, 60% yield).

**(3a*S*,4*R*,5*R*,7*S*,7*aR*)-2-(2-(*tert*-butyl)phenyl)-5-(1-(isoquinolin-1-yl)-4-morpholinonaphthalen-2-yl)hexahydro-1*H*-4,7-methanoisoindole-1,3(2*H*)-dione (12)**

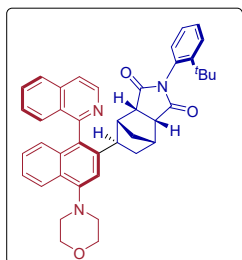

60% yield, white solid, **m.p.** = 158–160 °C. **<sup>1</sup>H NMR** (500 MHz, CDCl<sub>3</sub>) δ 8.70 (d, *J* = 5.7 Hz, 1H), 8.29 - 8.27 (m, 1H), 8.02 - 8.00 (m, 1H), 7.81 - 7.80 (m, 1H), 7.70 - 7.67 (m, 1H), 7.49 - 7.47 (m, 1H), 7.43 - 7.38 (m, 3H), 7.35 - 7.31 (m, 2H), 7.20 - 7.17 (m, 1H), 7.13 - 7.10 (m, 1H), 6.74 - 6.72 (m, 1H), 5.35 - 5.33 (m, 1H), 4.09 - 4.07 (m, 4H), 3.28 - 3.16 (m, 7H), 3.01 - 2.98 (m, 1H), 2.92 - 2.90 (m, 1H), 2.29 - 2.27 (m, 1H), 2.07 - 2.02 (m, 1H), 1.82 - 1.80 (m, 1H), 1.70 - 1.64 (m, 1H), 1.18 (s, 9H). **<sup>13</sup>C NMR** (126 MHz, CDCl<sub>3</sub>) δ 177.9, 176.9, 160.0, 150.1, 147.6, 142.7, 140.7, 136.4, 134.6, 130.8, 130.3, 130.0, 129.3, 128.7, 128.6, 127.9, 127.4, 127.2, 127.0, 126.9, 126.5, 126.4, 125.1, 123.2, 120.4, 112.0, 67.5, 53.7, 49.0, 48.6, 44.2, 41.5, 39.6, 39.5, 36.2, 35.6, 31.6.

**HRMS (ESI):** Calculated for [C<sub>42</sub>H<sub>42</sub>N<sub>3</sub>O<sub>3</sub>, M+H]<sup>+</sup>: 636.3221; Found: 636.3233.

**Optical Rotation:** [α]<sub>D</sub><sup>25</sup> = -109.9° (c = 1.0, CHCl<sub>3</sub>).

**IR** (neat, cm<sup>-1</sup>) = 1709, 1370, 1172, 1113, 1017, 752, 668, 619, 484, 439.

**HPLC:** Daicel Chiralpak IA Column (*n*-Hexane/*i*-PrOH = 70 : 30, 1.0 mL/min), 30 °C, 254 nm, *R*<sub>t</sub> = 8.092 min (major) and 12.440 min (minor). 96% ee.

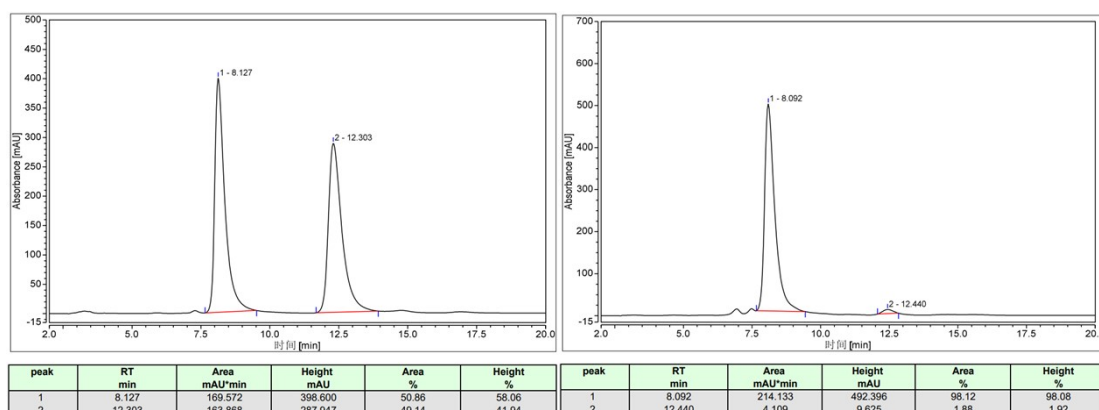

## IX. Mechanistic studies

**Mechanistic Studies.** To explore the mechanism of this C–H alkylation reaction, an equivalent reaction of substrate **2a** with the iridium metal catalyst was carried out. The presence of [Ir]–H intermediates was successfully observed by crude NMR, albeit not in significant amounts. This experimental result indicates that the reaction involves a C–H activation process and substrate **2a** is the source of the H atoms going through the asymmetric activation process.

### Iridium intermediate detection experiment:

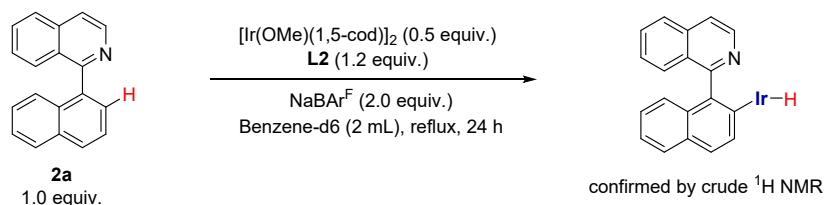

To an oven-dried 10 mL Schlenk tube containing a stirring bar was charged with [Ir(OMe)(1,5-cod)]<sub>2</sub> (0.015 mmol, 10.0 mg), **L2** (0.035 mmol, 24.4 mg) and 0.3 mL dry C<sub>6</sub>D<sub>6</sub> in a nitrogen-filled glove-box, the mixture was stirred for 10 min at room temperature. Then corresponding substrate **2a** (0.03 mmol, 1.0 equiv.), NaBARF (0.06 mmol, 53.2 mg) and another 0.3 mL dry C<sub>6</sub>D<sub>6</sub> were added sequentially. The mixture was stirred at 110 °C for 24 hours. The presence of Ir–H intermediates was observed through crude <sup>1</sup>H NMR.

### <sup>1</sup>H-NMR for [Ir]–H:

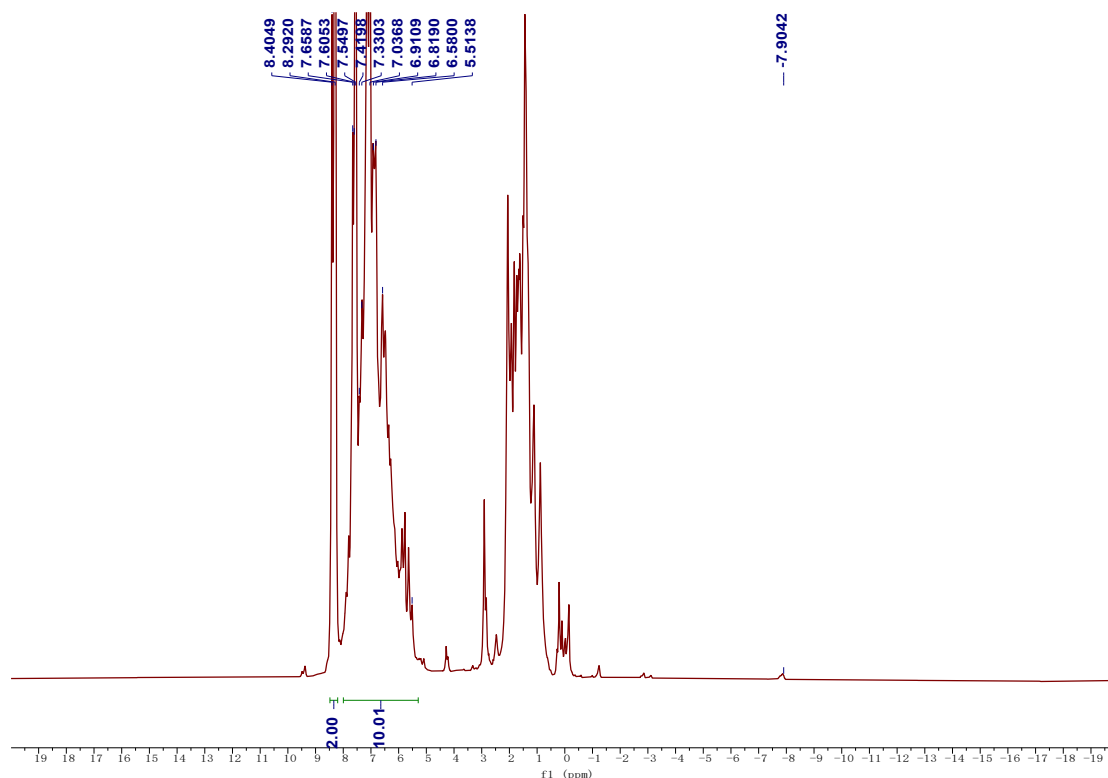

## X. Photophysical properties of selected compounds

Table S6. Absorption maxima and emission maxima of selected compounds

| compound   | $\lambda_{\text{abs}}$ (nm) <sup>[a]</sup> | $\lambda_{\text{em}}$ (nm) <sup>[b]</sup> |
|------------|--------------------------------------------|-------------------------------------------|
| <b>3ai</b> | 322                                        | 380                                       |
| <b>3ak</b> | 322                                        | 382                                       |
| <b>3ga</b> | 308                                        | 346                                       |
| <b>3ha</b> | 310                                        | 350                                       |
| <b>3ia</b> | 310                                        | 344                                       |
| <b>3la</b> | 317                                        | 366                                       |
| <b>7e</b>  | 327                                        | 388                                       |

[a] Absorption maximum in CH<sub>2</sub>Cl<sub>2</sub> at 10<sup>-3</sup> mol/L. [b] Emission maximum in CH<sub>2</sub>Cl<sub>2</sub> at 10<sup>-3</sup> mol/L.

## XI. References

- [1] K. Kim, J. Hyun, J. Kim, H. Kim, *Asian J. Org. Chem.* **2016**, *5*, 1107-1110.
- [2] Z.-S. Liu, P.-P. Xie, Y. Hua, C. Wu, Y. Ma, J. Chen, H.-G. Cheng, X. Hong, Q. Zhou, *Chem* **2021**, *7*, 1917-1932.
- [3] L. Liu, J. Lin, M. Pang, H. Jin, X. Yu, S. Wang, *Org. Lett.* **2022**, *24*, 1146-1151.
- [4] a) X.-W. Gu, Y.-L. Sun, J.-L. Xie, X.-B. Wang, Z. Xu, G.-W. Yin, L. Li, K.-F. Yang, L.-W. Xu, *Nat. Commun.* **2020**, *11*, 2904; b) F. Sun, T. Wang, G.-J. Cheng, X. Fang, *ACS Catal.* **2021**, *11*, 7578-7583.
- [5] J. Zheng, S.-L. You, *Angew. Chem. Int. Ed.* **2014**, *53*, 13244-13247.
- [6] X.-M. Wang, P. Zhang, Q. Xu, C.-Q. Guo, D.-B. Zhang, C.-J. Lu, R.-R. Liu, *J. Am. Chem. Soc.* **2021**, *143*, 15005-15010.
- [7] a) A. V. Malkov, P. Ramírez-López, L. Biedermannová, L. Rulíšek, L. Dufková, M. Kotora, F. Zhu, P. Kočovský, *J. Am. Chem. Soc.* **2008**, *130*, 5341-5348; b) Q. Wang, Z.-J. Cai, C.-X. Liu, Q. Gu, S.-L. You, *J. Am. Chem. Soc.* **2019**, *141*, 9504-9510.
- [8] a) X. Song, X. Cai, X. Zhang, X. Fan, *Org. Chem. Front.* **2021**, *8*, 6265-6272; b) X. Song, Q. Zhou, J. Zhao, Y. Jiang, X. Zhang, X. Zhang, X. Fan, *Org. Lett.* **2020**, *22*, 9506-9512.
- [9] A. Romero-Arenas, V. Hornillos, J. Iglesias-Sigüenza, R. Fernández, J. López-Serrano, A. Ros, J. M. Lassaletta, *J. Am. Chem. Soc.* **2020**, *142*, 2628-2639.

## XII. X-ray Crystallographic data for 3ca, 5m, 7i and 7k

Single crystals for X-ray studies were grown by slow evaporation of a solution of compound **3ca** in a mixture of EtOAc and CHCl<sub>3</sub> at room temperature. X-Ray structural analysis of single crystal **3ca** was obtained to confirm the absolute configuration. The X-ray data of **3ca** is deposited in the Cambridge Crystallographic Data Centre with a number CCDC 2278431.

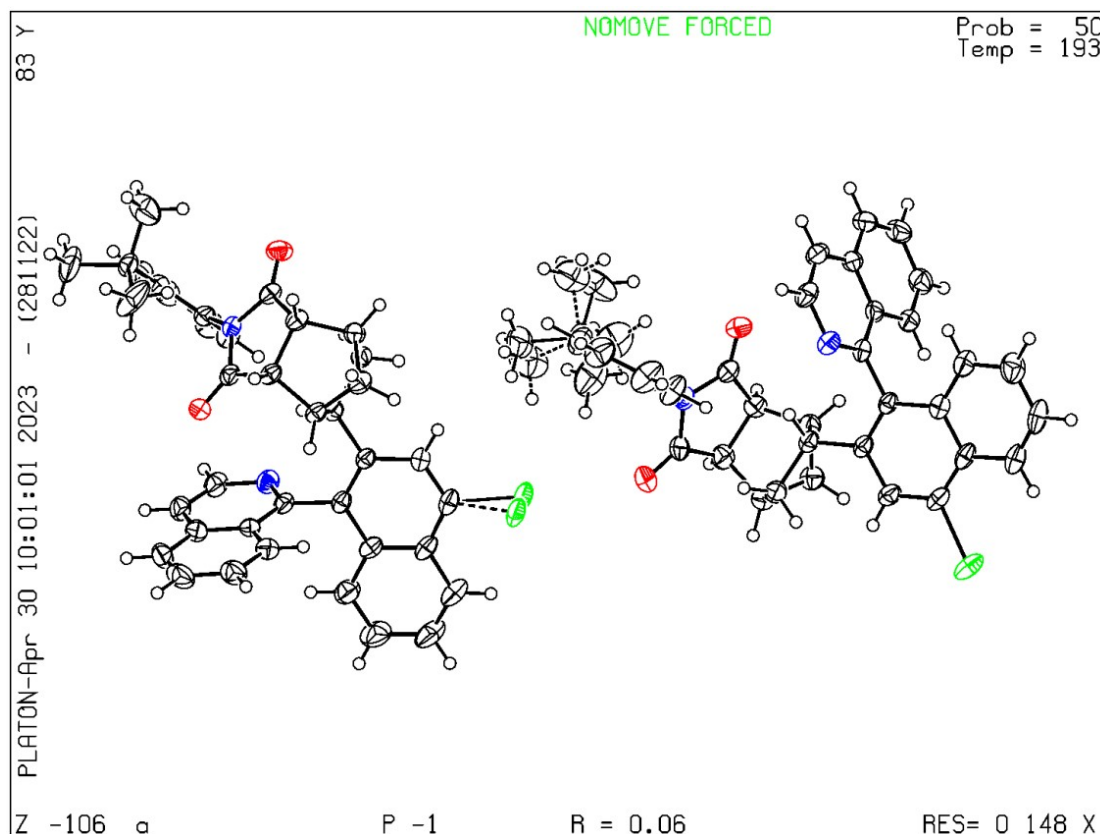

Figure S1. X-ray structure of **3ca**

Table S7. Crystal data and structure refinement for **3ca**

|                      |                                                                 |                   |
|----------------------|-----------------------------------------------------------------|-------------------|
| Identification code  | A                                                               |                   |
| Empirical formula    | C <sub>38</sub> H <sub>33</sub> BrN <sub>2</sub> O <sub>2</sub> |                   |
| Formula weight       | 629.57                                                          |                   |
| Temperature          | 193.00 K                                                        |                   |
| Crystal system       | triclinic                                                       |                   |
| Space group          | P-1                                                             |                   |
| Unit cell dimensions | a = 12.7215(5) Å                                                | α = 99.0400(10)°. |
|                      | b = 15.7043(6) Å                                                | β = 90.0390(10)°. |
|                      | c = 16.4829(6) Å                                                | γ = 111.104(2)°.  |
| Volume               | 3028.1(2) Å <sup>3</sup>                                        |                   |
| Z                    | 4                                                               |                   |
| Density (calculated) | 1.381 Mg/m <sup>3</sup>                                         |                   |

|                                   |                                                                |
|-----------------------------------|----------------------------------------------------------------|
| Absorption coefficient            | 1.395 mm <sup>-1</sup>                                         |
| F(000)                            | 1304.0                                                         |
| Crystal size                      | 0.13 × 0.12 × 0.1 mm <sup>3</sup>                              |
| Radiation                         | MoKα (λ = 0.71073)                                             |
| Theta range for data collection   | 3.564 to 55.072°.                                              |
| Index ranges                      | -14 ≤ h ≤ 16, -20 ≤ k ≤ 20, -20 ≤ l ≤ 21                       |
| Reflections collected             | 28882                                                          |
| Independent reflections           | 13858 [R <sub>int</sub> = 0.0591, R <sub>sigma</sub> = 0.0918] |
| Data / restraints / parameters    | 13858 / 88 / 816                                               |
| Goodness-of-fit on F <sup>2</sup> | 0.995                                                          |
| Final R indices [I > 2σ(I)]       | R <sub>1</sub> = 0.0574, wR <sub>2</sub> = 0.1179              |
| R indices (all data)              | R <sub>1</sub> = 0.1090, wR <sub>2</sub> = 0.1440              |
| Largest diff. peak and hole       | 0.59 and -0.73 e.Å <sup>-3</sup>                               |

Single crystals for X-ray studies were grown by slow evaporation of a solution of recrystallized compound **5m** in a mixture of hexane and DCM at room temperature. X-Ray structural analysis of single crystal **5m** was obtained to confirm the absolute configuration. The X-ray data of **5m** is deposited in the Cambridge Crystallographic Data Centre with a number CCDC 2283545.

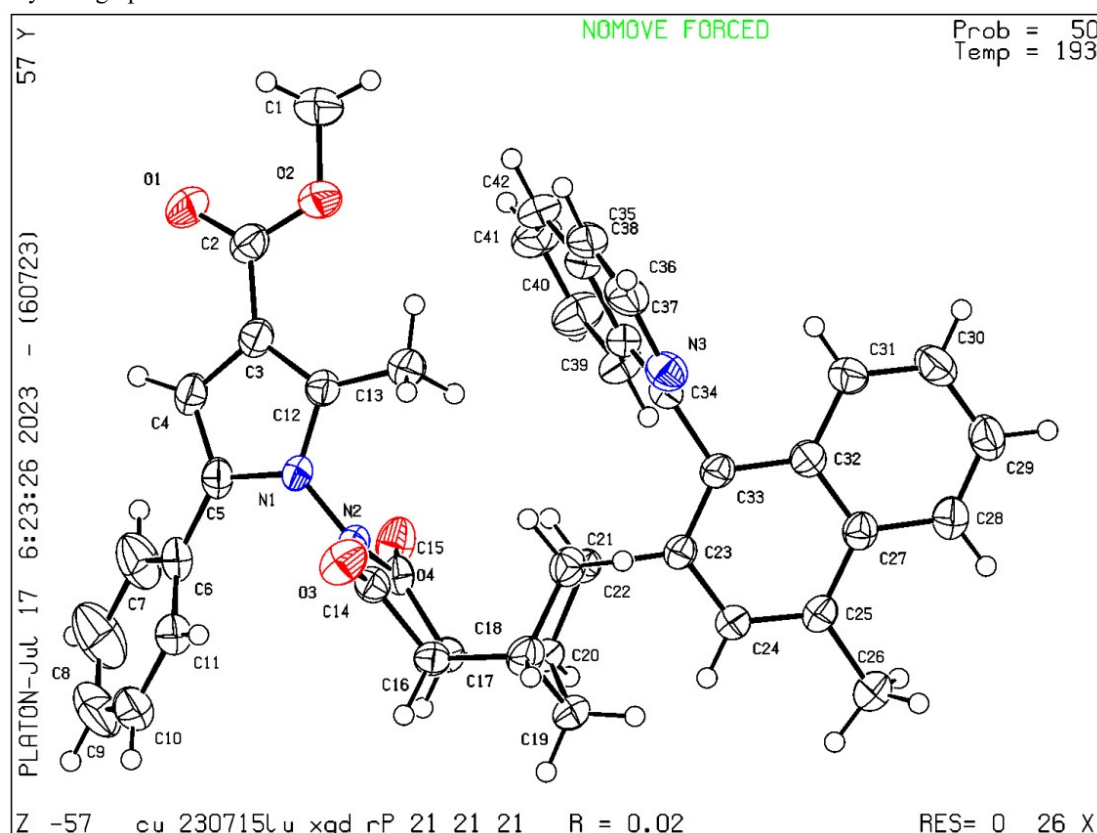

Figure S2. X-ray structure of **5m**

Table S8. Crystal data and structure refinement for **5m**

|                        |                                                               |          |
|------------------------|---------------------------------------------------------------|----------|
| Identification code    | cu_230715LU_XGD_RZQ_HXQ_0m                                    |          |
| Empirical formula      | C <sub>42</sub> H <sub>35</sub> N <sub>3</sub> O <sub>4</sub> |          |
| Formula weight         | 645.73                                                        |          |
| Temperature            | 193.00 K                                                      |          |
| Crystal system         | orthorhombic                                                  |          |
| Space group            | P2 <sub>1</sub> 2 <sub>1</sub> 2 <sub>1</sub>                 |          |
| Unit cell dimensions   | a = 11.4007(3) Å                                              | α = 90°. |
|                        | b = 12.6971(3) Å                                              | β = 90°. |
|                        | c = 23.0034(6) Å                                              | γ = 90°. |
| Volume                 | 3329.88(15) Å <sup>3</sup>                                    |          |
| Z                      | 4                                                             |          |
| Density (calculated)   | 1.288 Mg/m <sup>3</sup>                                       |          |
| Absorption coefficient | 0.665 mm <sup>-1</sup>                                        |          |
| F(000)                 | 1360.0                                                        |          |

|                                      |                                                               |
|--------------------------------------|---------------------------------------------------------------|
| Crystal size                         | $0.13 \times 0.12 \times 0.1 \text{ mm}^3$                    |
| Radiation                            | $\text{CuK}\alpha$ ( $\lambda = 1.54178$ )                    |
| Theta range for data collection      | 7.686 to 136.604°.                                            |
| Index ranges                         | $-13 \leq h \leq 13, -15 \leq k \leq 15, -27 \leq l \leq 27$  |
| Reflections collected                | 77740                                                         |
| Independent reflections              | 6111 [ $R_{\text{int}} = 0.0374, R_{\text{sigma}} = 0.0166$ ] |
| Data / restraints / parameters       | 6111 / 0 / 446                                                |
| Goodness-of-fit on $F^2$             | 1.054                                                         |
| Final R indices [ $I > 2\sigma(I)$ ] | $R_1 = 0.0245, wR_2 = 0.0645$                                 |
| R indices (all data)                 | $R_1 = 0.0249, wR_2 = 0.0648$                                 |
| Largest diff. peak and hole          | 0.17 and -0.09 $\text{e.}\text{\AA}^{-3}$                     |
| Flack parameter                      | 0.01(3)                                                       |



Single crystals for X-ray studies were grown by slow evaporation of a solution of compound **7i** in a mixture of EtOAc and CHCl<sub>3</sub> at room temperature. X-Ray structural analysis of single crystal **7i** was obtained to confirm the absolute configuration. The X-ray data of **7i** is deposited in the Cambridge Crystallographic Data Centre with a number CCDC 2309607.

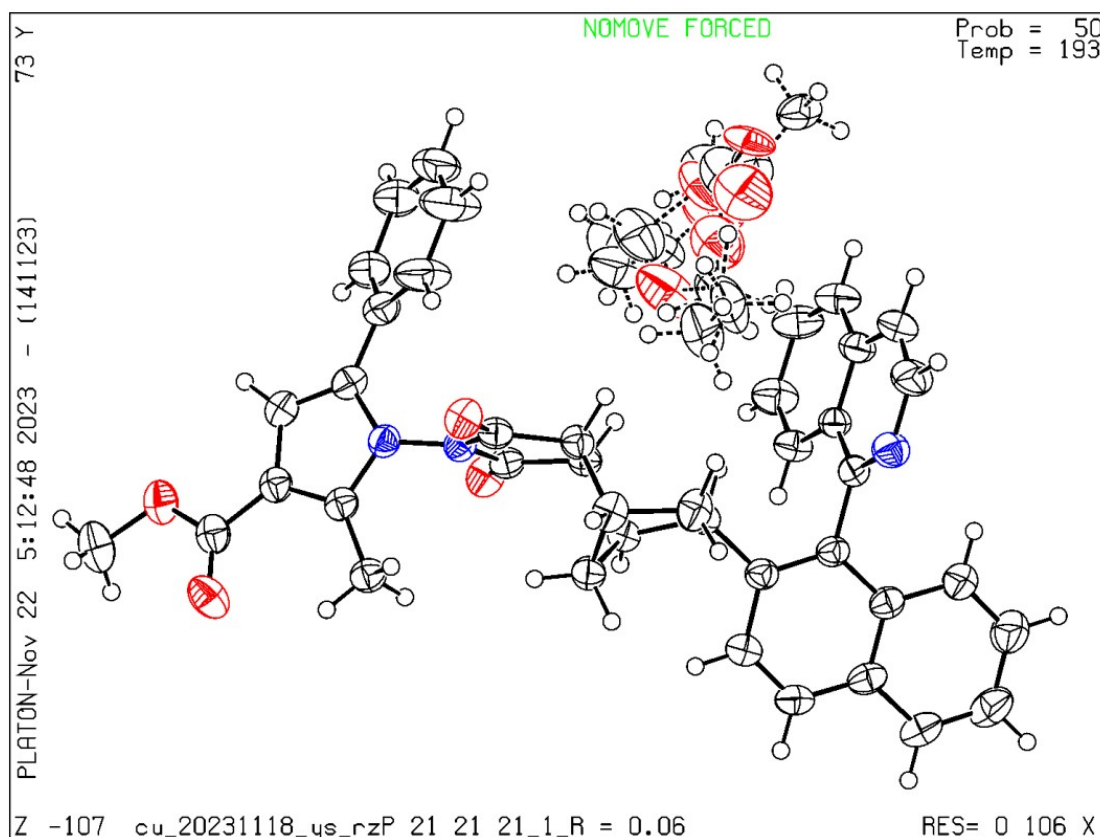

Figure S3. X-ray structure of **7i**

Table S9. Crystal data and structure refinement for **7i**

|                        |                                                               |          |
|------------------------|---------------------------------------------------------------|----------|
| Identification code    | cu_20231118_YS_RZQ_ZYX1_138_1_                                |          |
| Empirical formula      | C <sub>45</sub> H <sub>41</sub> N <sub>3</sub> O <sub>6</sub> |          |
| Formula weight         | 719.81                                                        |          |
| Temperature            | 193.00 K                                                      |          |
| Crystal system         | orthorhombic                                                  |          |
| Space group            | P2 <sub>1</sub> 2 <sub>1</sub> 2 <sub>1</sub>                 |          |
| Unit cell dimensions   | a = 10.0009(5) Å                                              | α = 90°. |
|                        | b = 11.0174(6) Å                                              | β = 90°. |
|                        | c = 34.0362(18) Å                                             | γ = 90°. |
| Volume                 | 3750.2(3) Å <sup>3</sup>                                      |          |
| Z                      | 4                                                             |          |
| Density (calculated)   | 1.275 Mg/m <sup>3</sup>                                       |          |
| Absorption coefficient | 0.684 mm <sup>-1</sup>                                        |          |

|                                      |                                                                    |
|--------------------------------------|--------------------------------------------------------------------|
| F(000)                               | 1520.0                                                             |
| Crystal size                         | $0.13 \times 0.12 \times 0.1 \text{ mm}^3$                         |
| Radiation                            | CuK $\alpha$ ( $\lambda = 1.54178$ )                               |
| Theta range for data collection      | 8.436 to 136.858°.                                                 |
| Index ranges                         | $-12 \leq h \leq 11$ , $-13 \leq k \leq 13$ , $-40 \leq l \leq 41$ |
| Reflections collected                | 59003                                                              |
| Independent reflections              | 6840 [ $R_{\text{int}} = 0.0454$ , $R_{\text{sigma}} = 0.0275$ ]   |
| Data / restraints / parameters       | 6840 / 285 / 602                                                   |
| Goodness-of-fit on $F^2$             | 1.086                                                              |
| Final R indices [ $I > 2\sigma(I)$ ] | $R_1 = 0.0557$ , $wR_2 = 0.1536$                                   |
| R indices (all data)                 | $R_1 = 0.0575$ , $wR_2 = 0.1570$                                   |
| Largest diff. peak and hole          | 0.73 and -0.43 e. $\text{\AA}^{-3}$                                |
| Flack parameter                      | 0.00(7)                                                            |

Single crystals for X-ray studies were grown by slow evaporation of a solution of compound **7k** in a mixture of EtOH and CHCl<sub>3</sub> at room temperature. X-Ray structural analysis of single crystal **7k** was obtained to confirm the absolute configuration. The X-ray data of **7k** is deposited in the Cambridge Crystallographic Data Centre with a number CCDC 2309606.

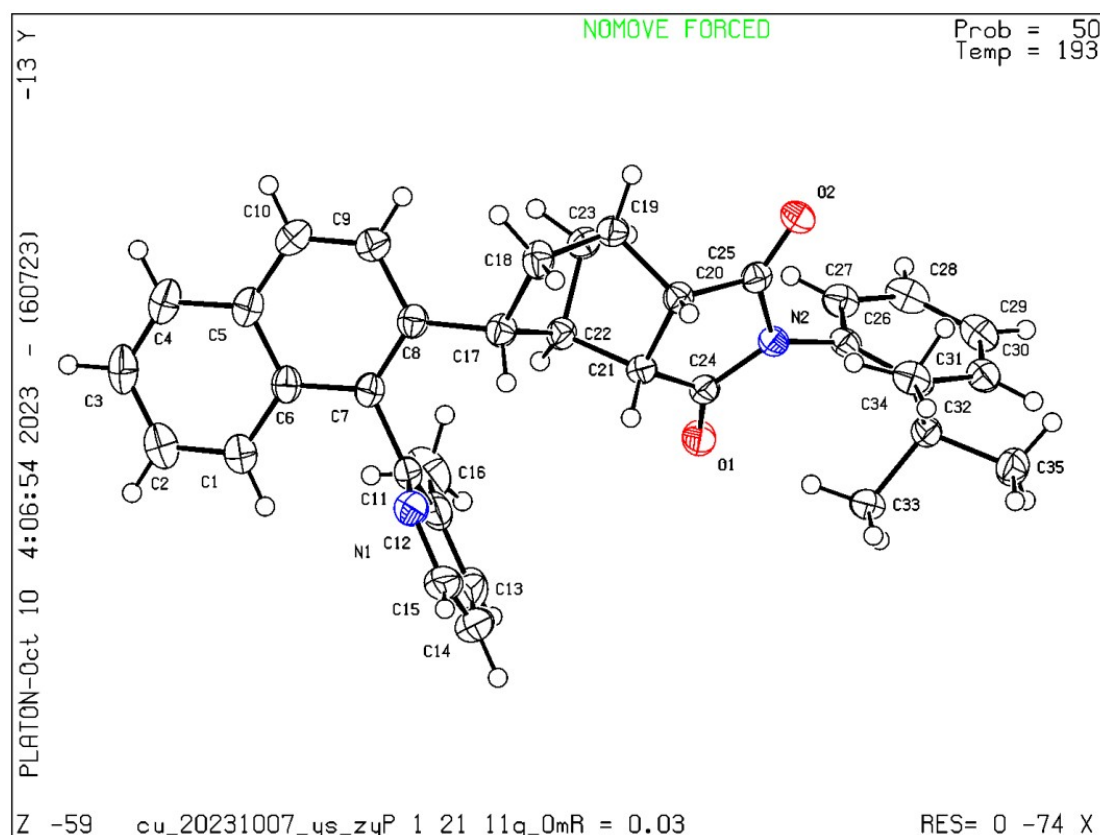

**Figure S4.** X-ray structure of **7k**

**Table S10.** Crystal data and structure refinement for **7k**

|                        |                                                               |                 |
|------------------------|---------------------------------------------------------------|-----------------|
| Identification code    | cu_20231007_YS_ZYX_1_121_1G_0m                                |                 |
| Empirical formula      | C <sub>35</sub> H <sub>34</sub> N <sub>2</sub> O <sub>2</sub> |                 |
| Formula weight         | 514.64                                                        |                 |
| Temperature            | 193.00 K                                                      |                 |
| Crystal system         | monoclinic                                                    |                 |
| Space group            | P2 <sub>1</sub>                                               |                 |
| Unit cell dimensions   | a = 10.8233(6) Å                                              | α = 90°.        |
|                        | b = 7.0541(4) Å                                               | β = 94.633(2)°. |
|                        | c = 18.1771(10) Å                                             | γ = 90°.        |
| Volume                 | 1383.26(13) Å <sup>3</sup>                                    |                 |
| Z                      | 2                                                             |                 |
| Density (calculated)   | 1.236 Mg/m <sup>3</sup>                                       |                 |
| Absorption coefficient | 0.596 mm <sup>-1</sup>                                        |                 |
| F(000)                 | 548.0                                                         |                 |

|                                      |                                                                  |
|--------------------------------------|------------------------------------------------------------------|
| Crystal size                         | $0.13 \times 0.12 \times 0.1 \text{ mm}^3$                       |
| Radiation                            | $\text{CuK}\alpha$ ( $\lambda = 1.54178$ )                       |
| Theta range for data collection      | 4.878 to 136.546°.                                               |
| Index ranges                         | $-13 \leq h \leq 13$ , $-8 \leq k \leq 8$ , $-21 \leq l \leq 20$ |
| Reflections collected                | 25438                                                            |
| Independent reflections              | 5006 [ $R_{\text{int}} = 0.0372$ , $R_{\text{sigma}} = 0.0332$ ] |
| Data / restraints / parameters       | 5006 / 1 / 356                                                   |
| Goodness-of-fit on $F^2$             | 1.088                                                            |
| Final R indices [ $I > 2\sigma(I)$ ] | $R_1 = 0.0319$ , $wR_2 = 0.0804$                                 |
| R indices (all data)                 | $R_1 = 0.0321$ , $wR_2 = 0.0806$                                 |
| Largest diff. peak and hole          | 0.17 and -0.23 $\text{e.}\text{\AA}^{-3}$                        |
| Flack parameter                      | 0.06(4)                                                          |

### XIII. $^1\text{H}$ NMR, $^{13}\text{C}$ NMR, and $^{19}\text{F}$ NMR spectra

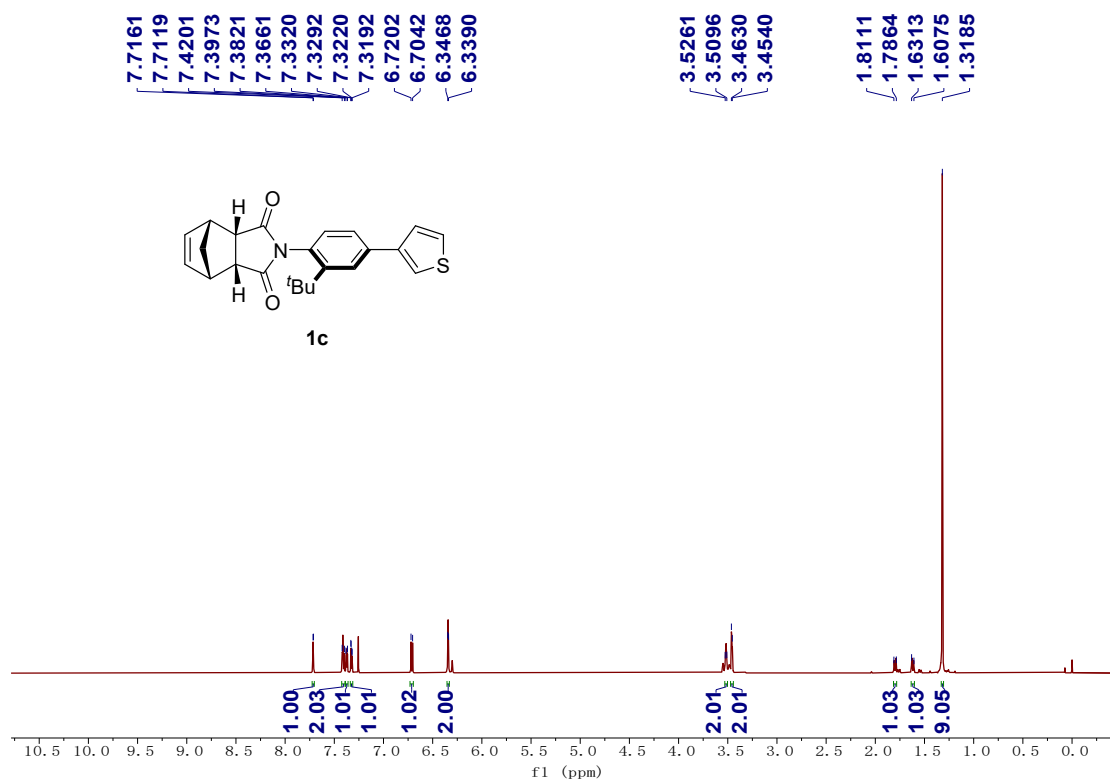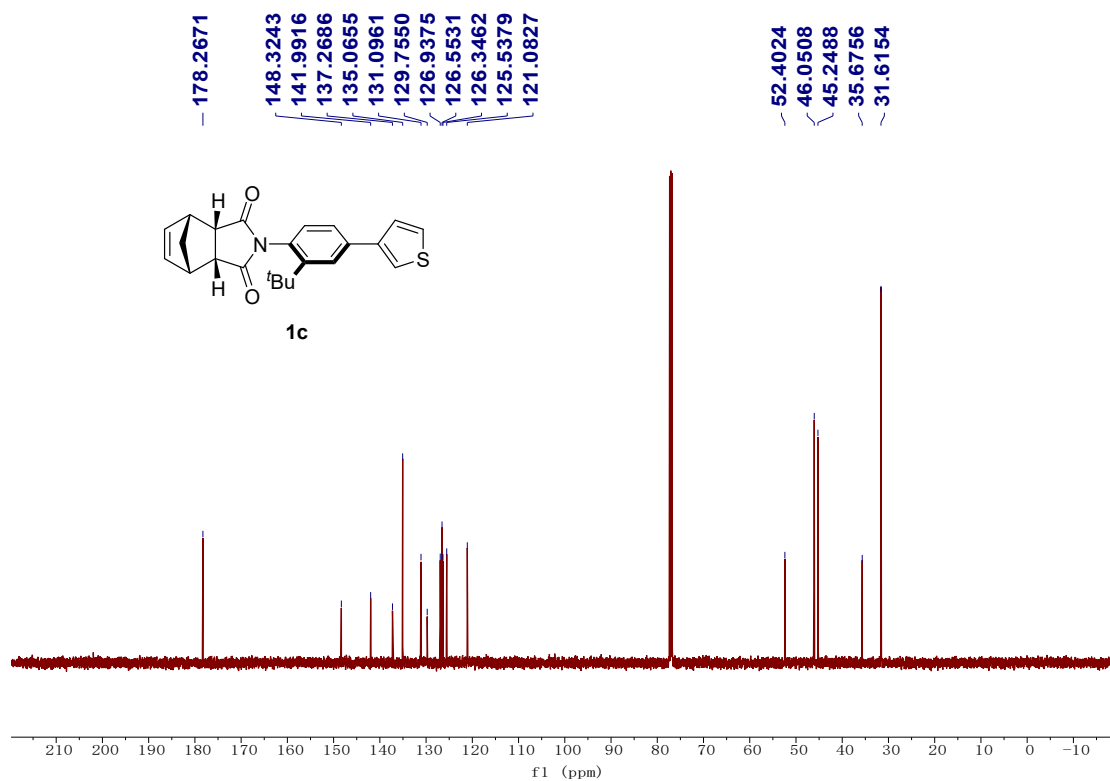

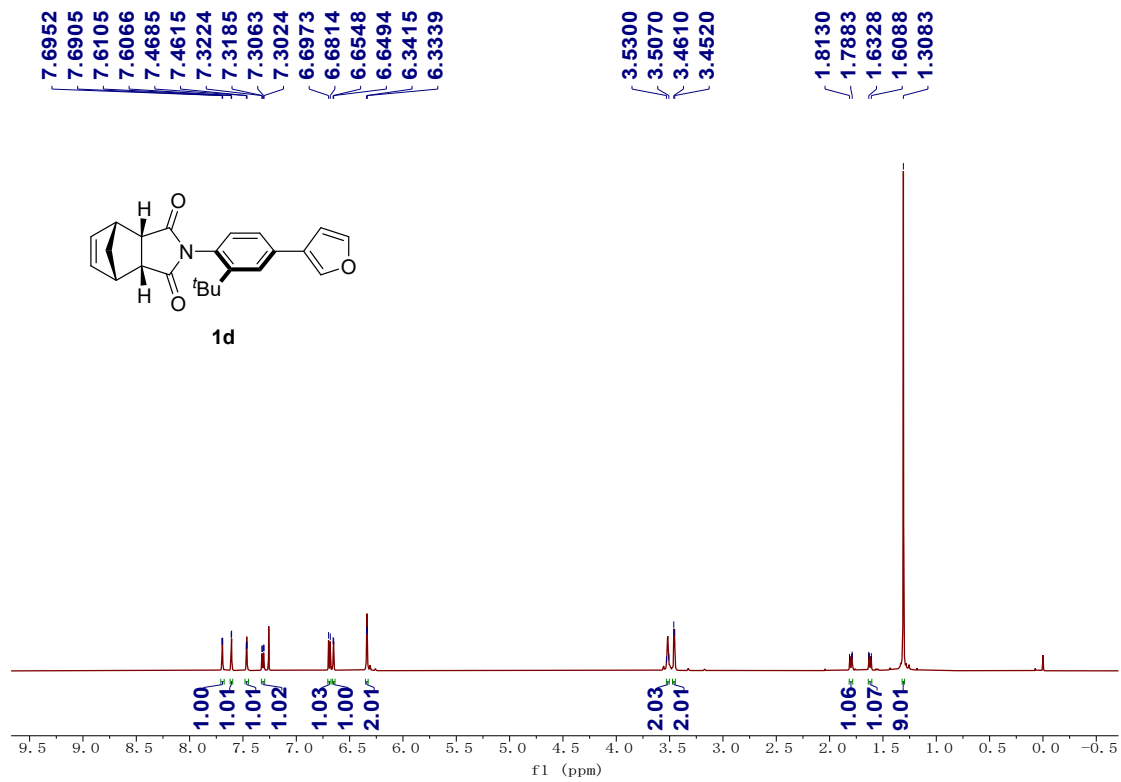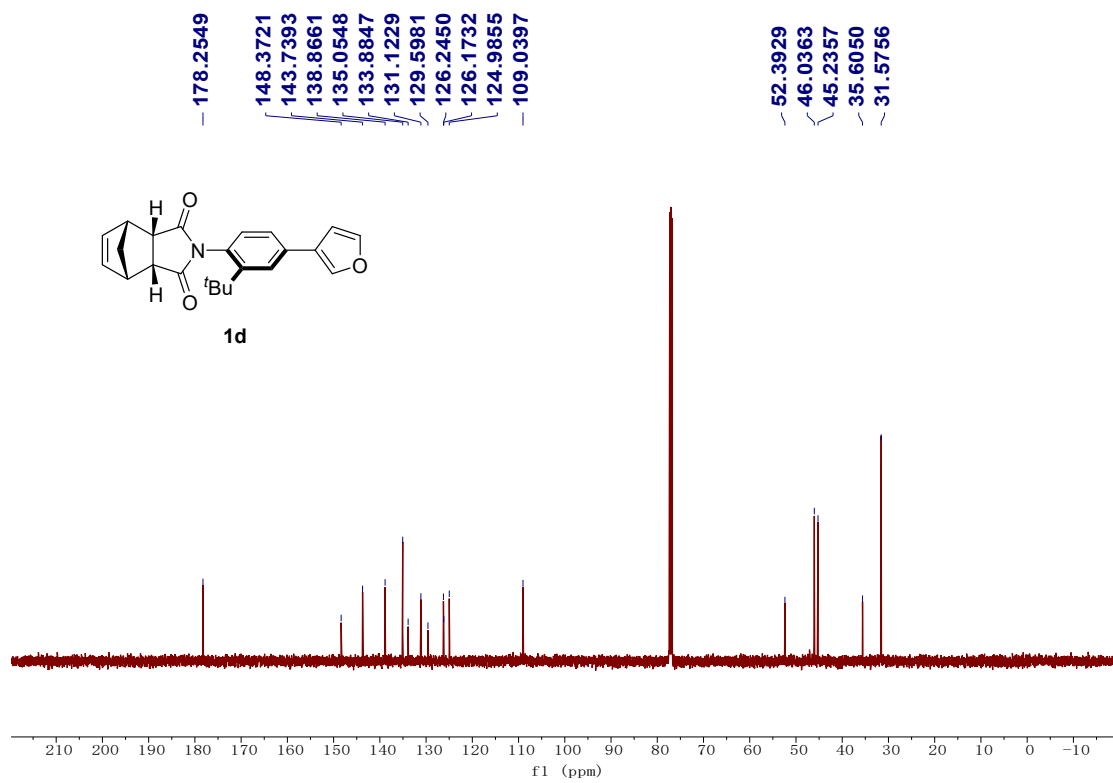

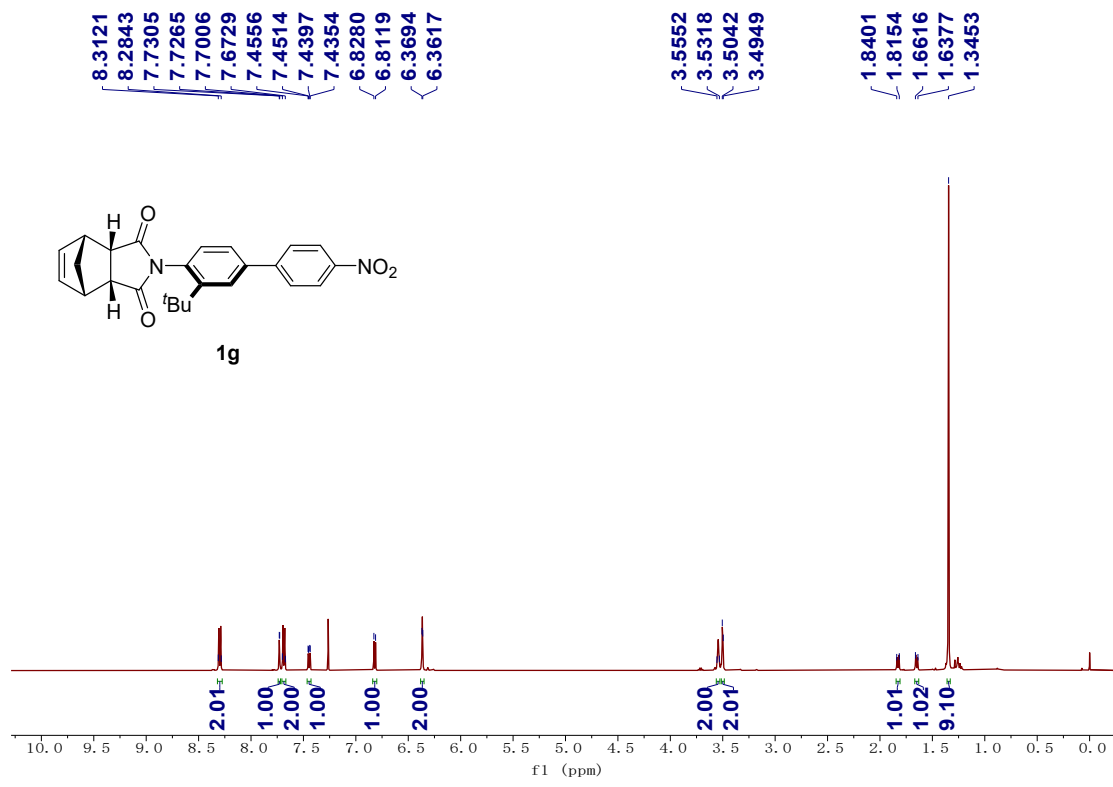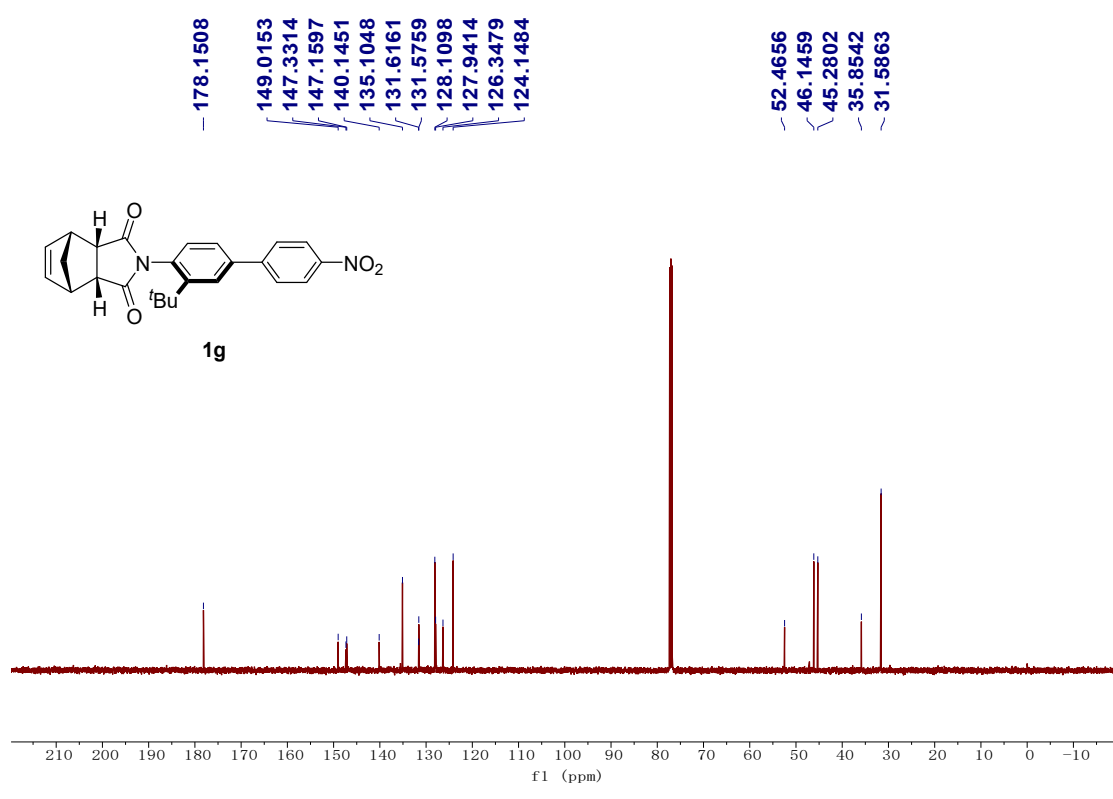

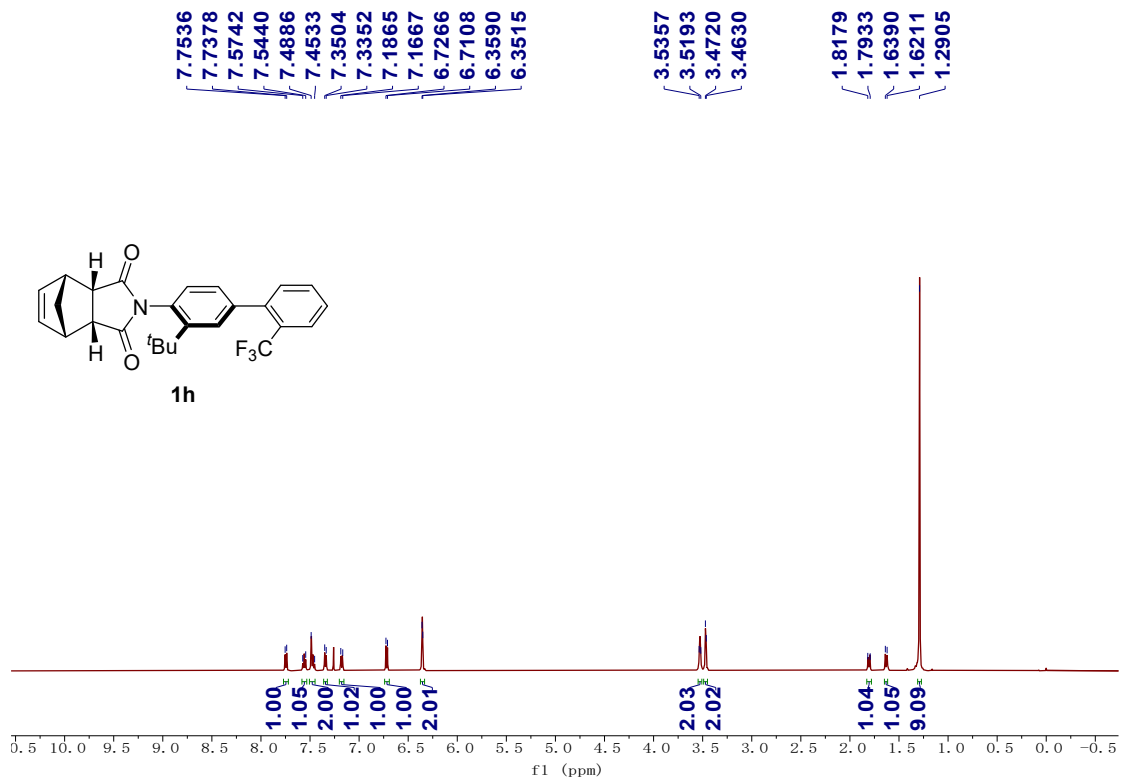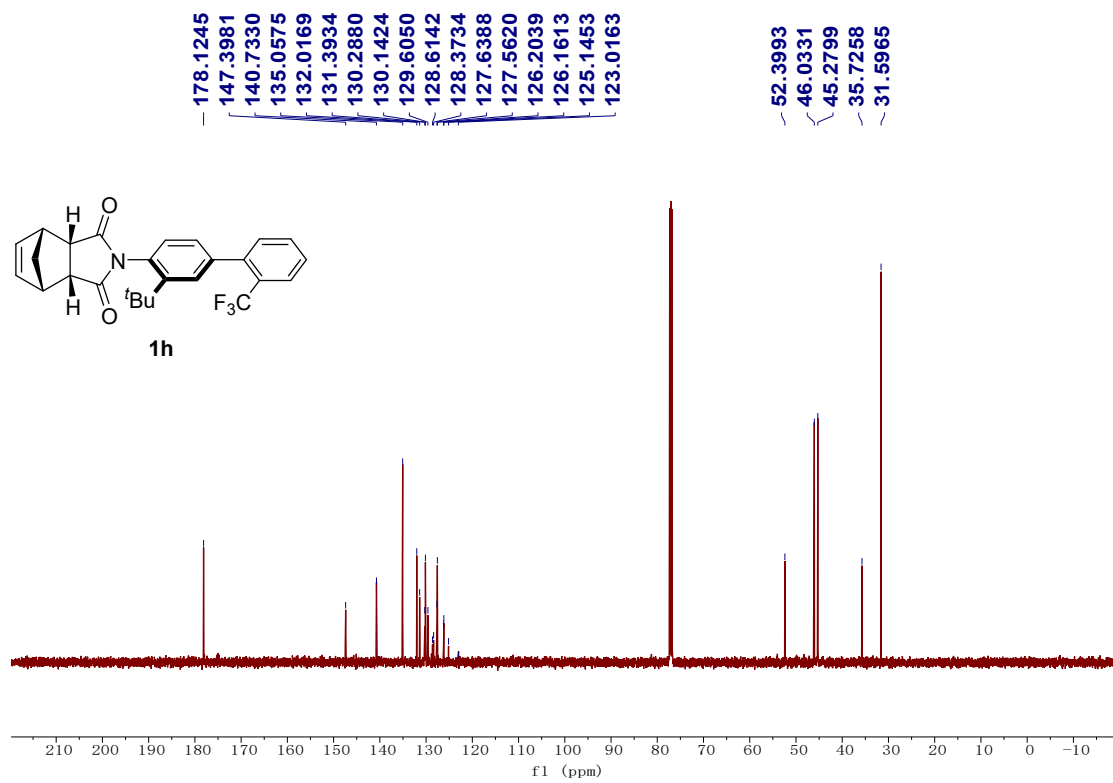



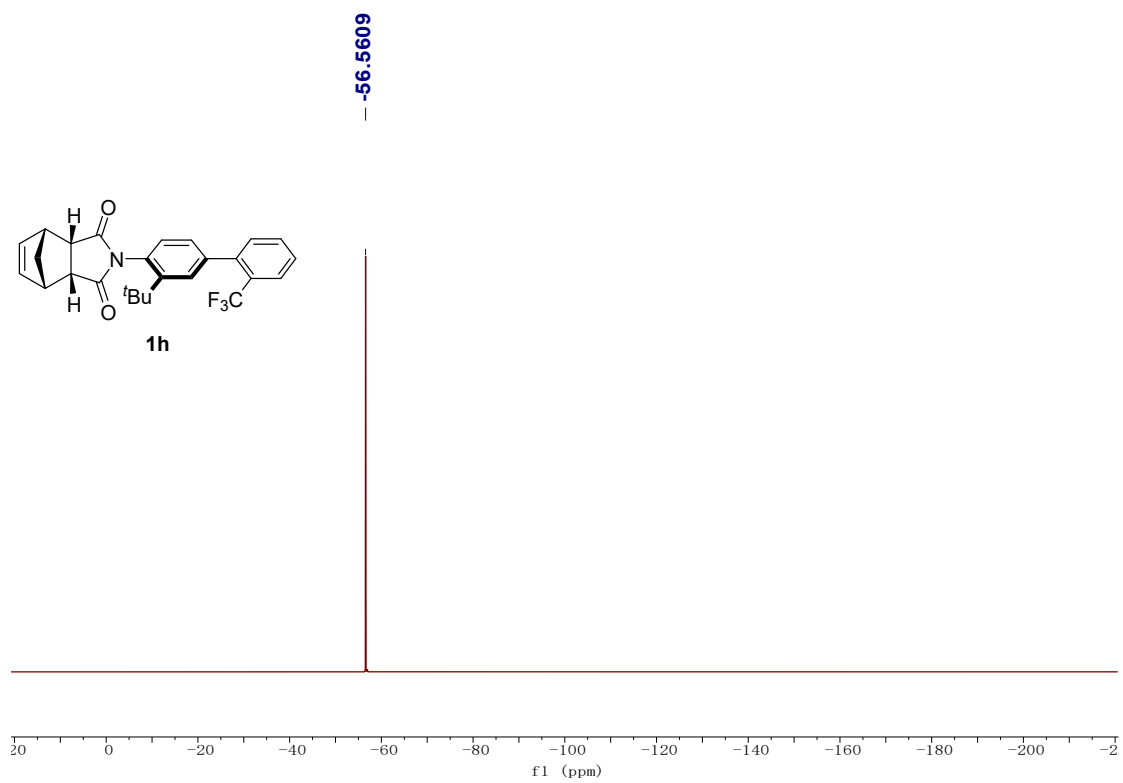

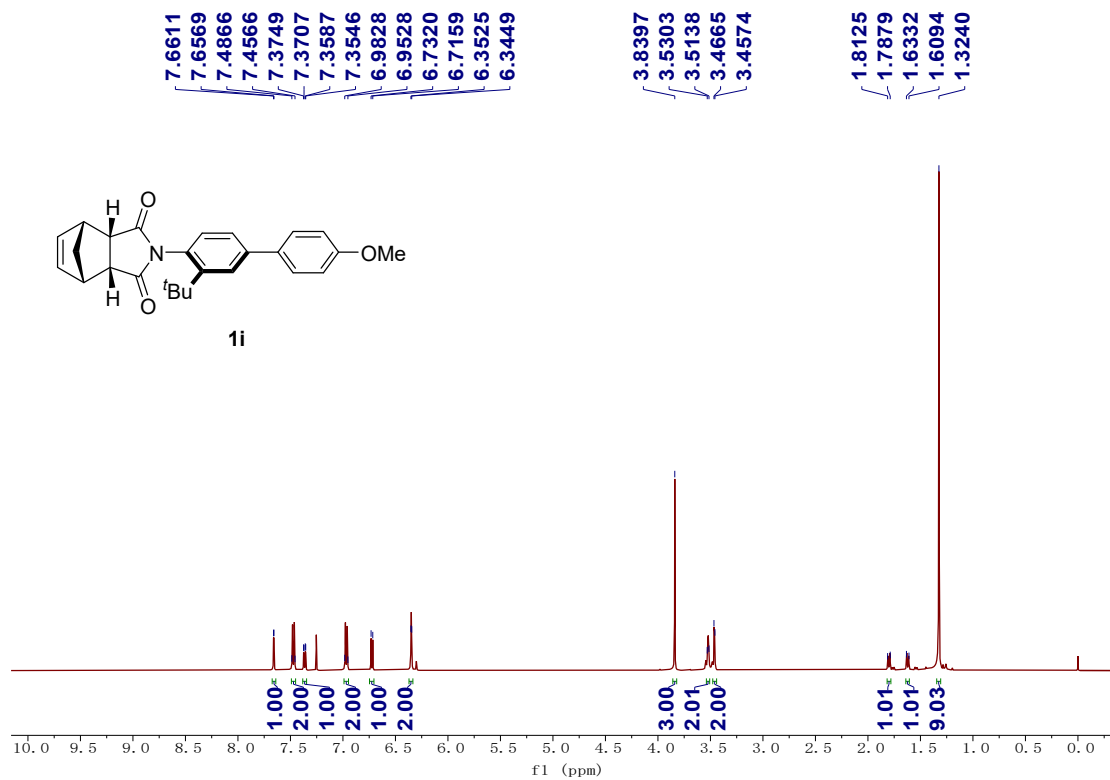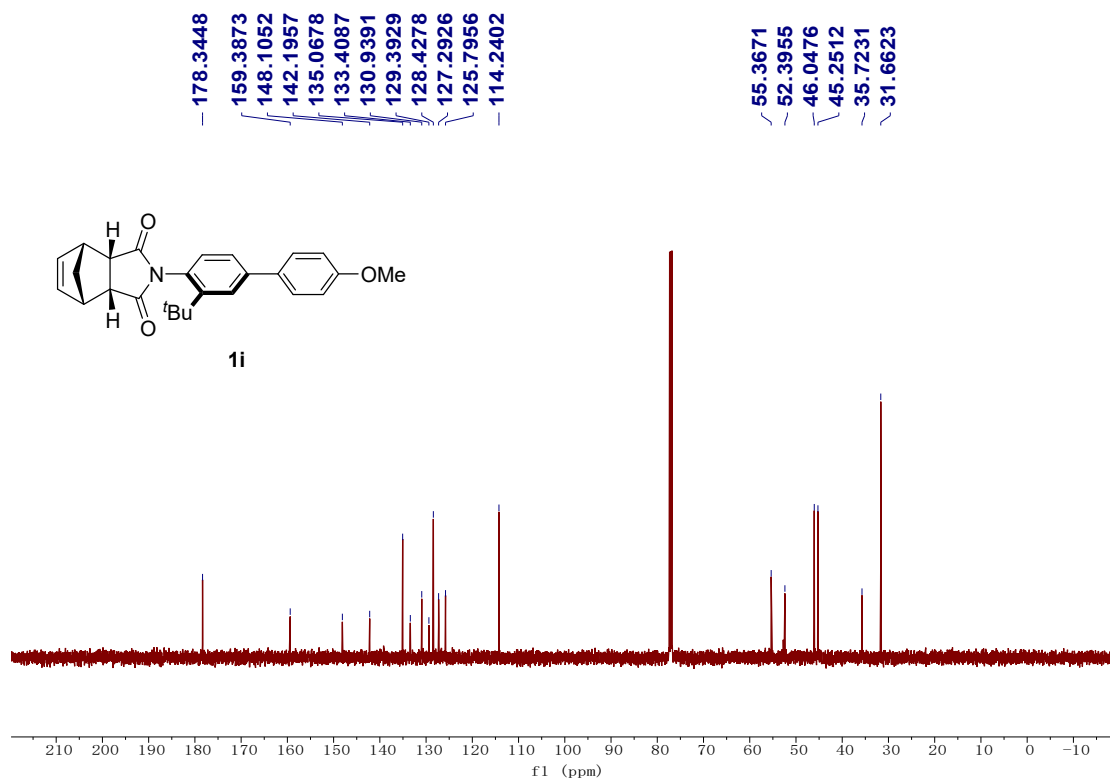

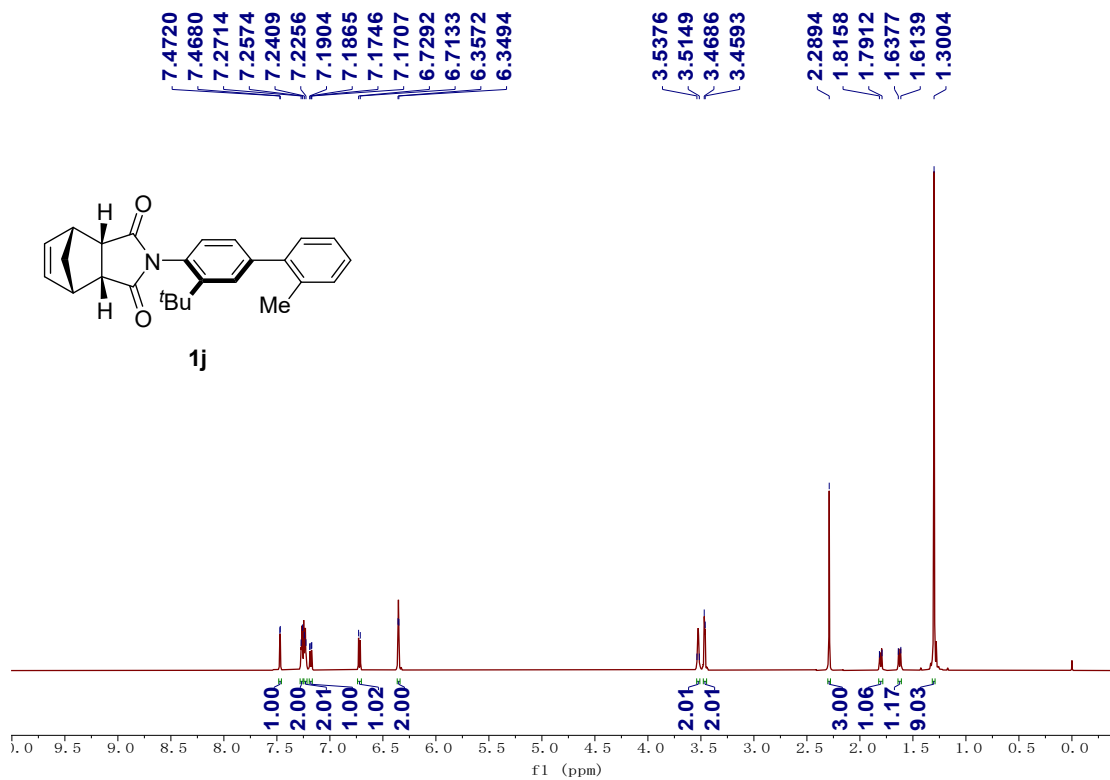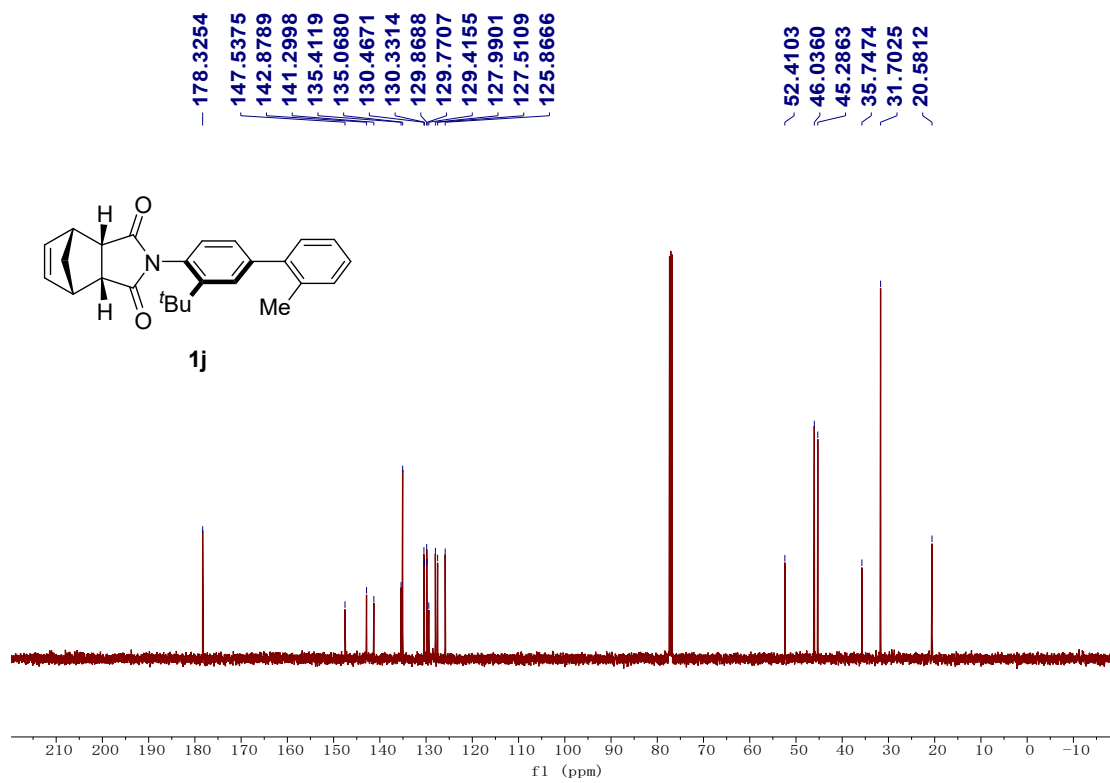

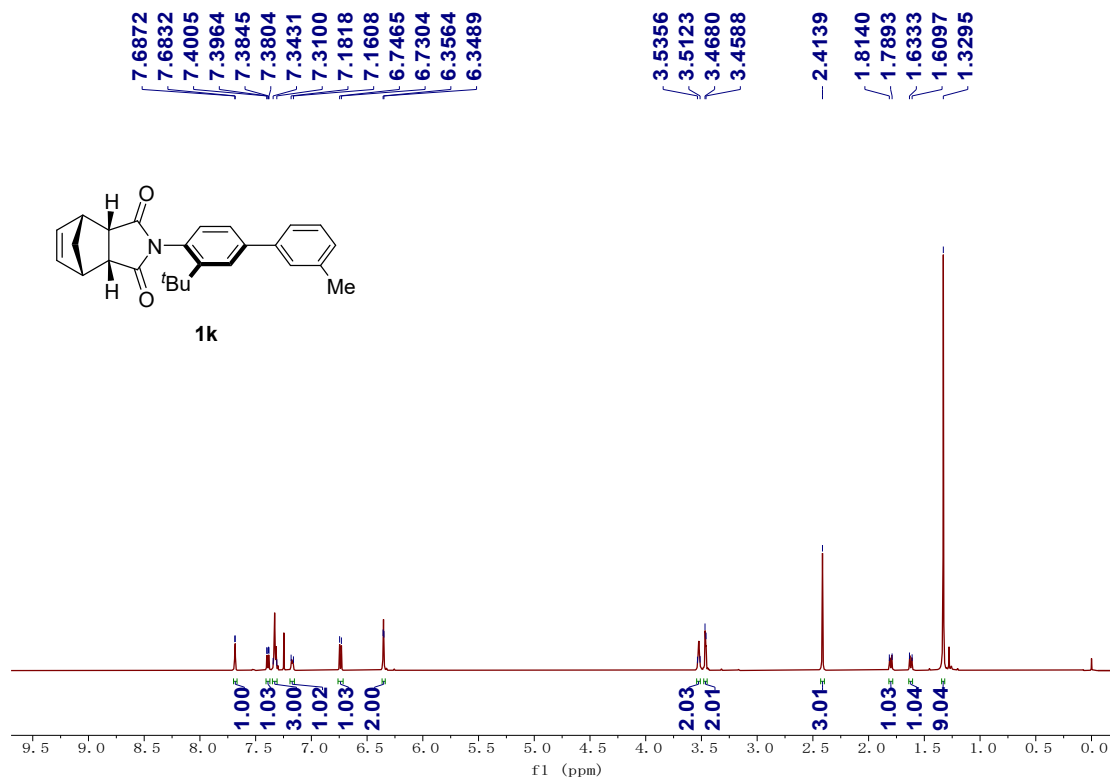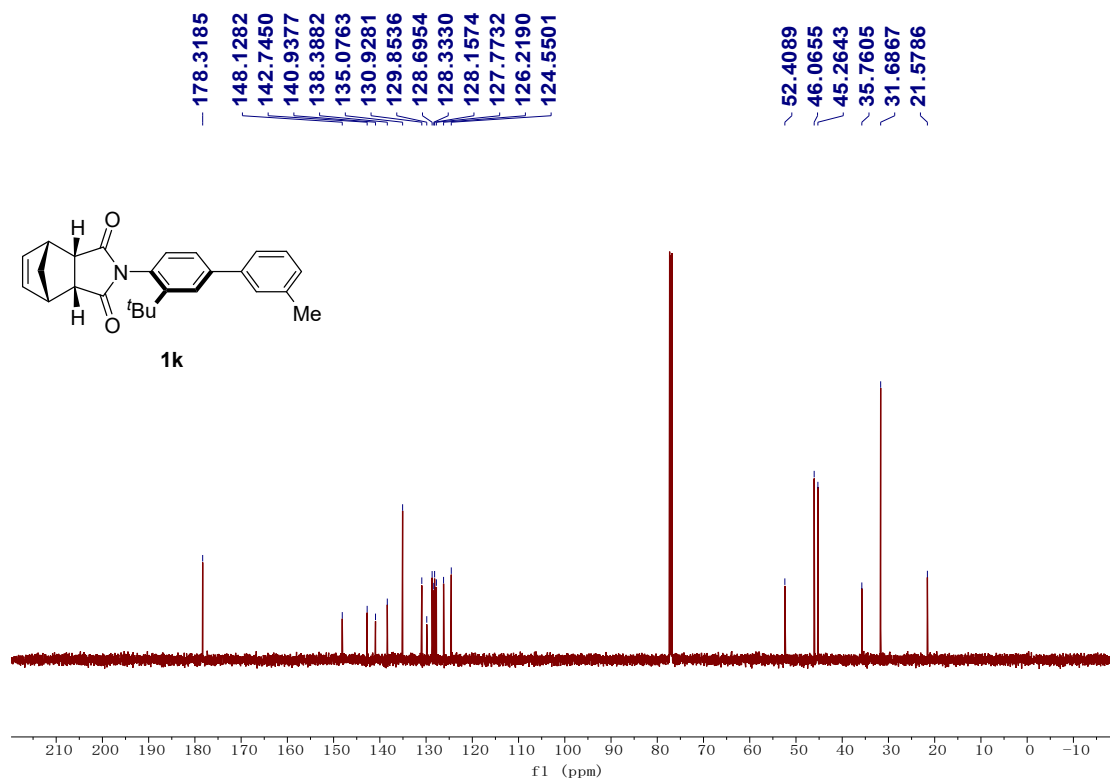

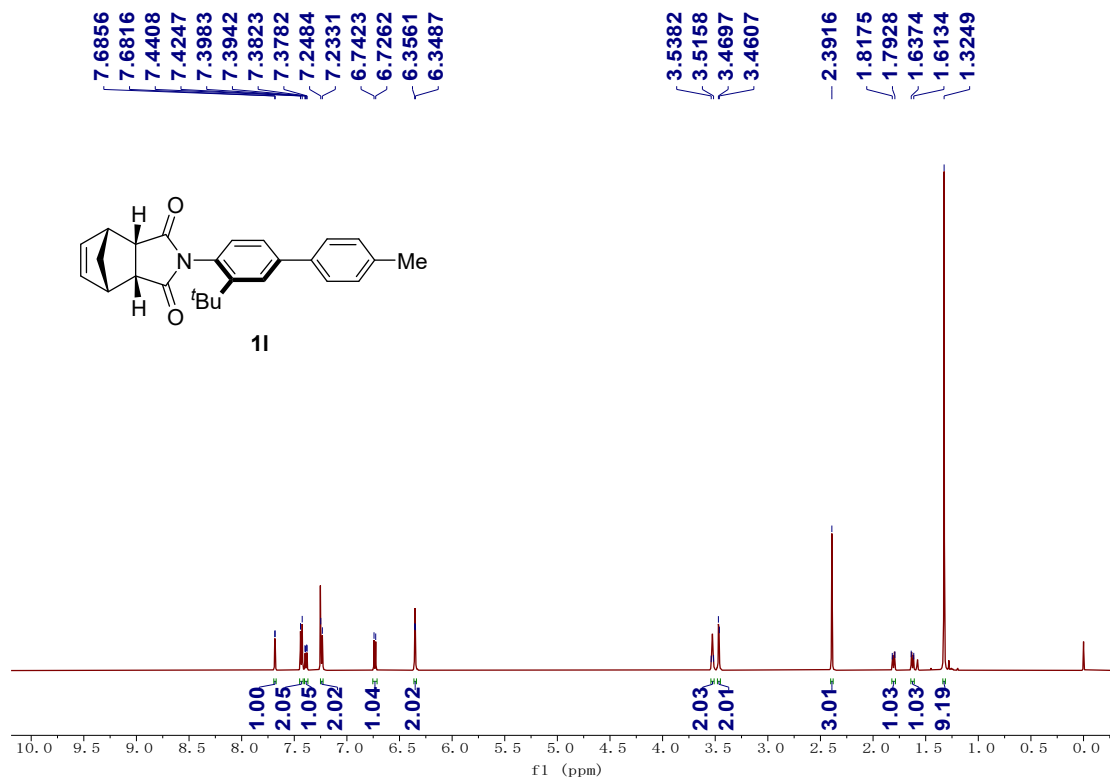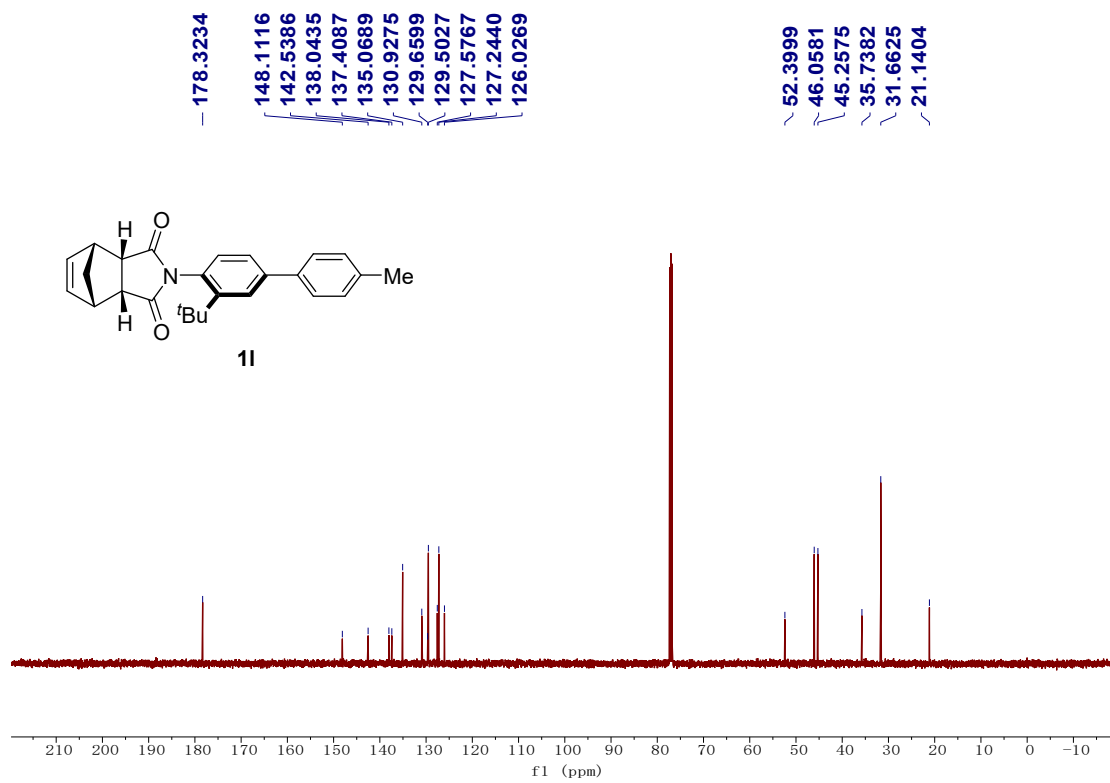

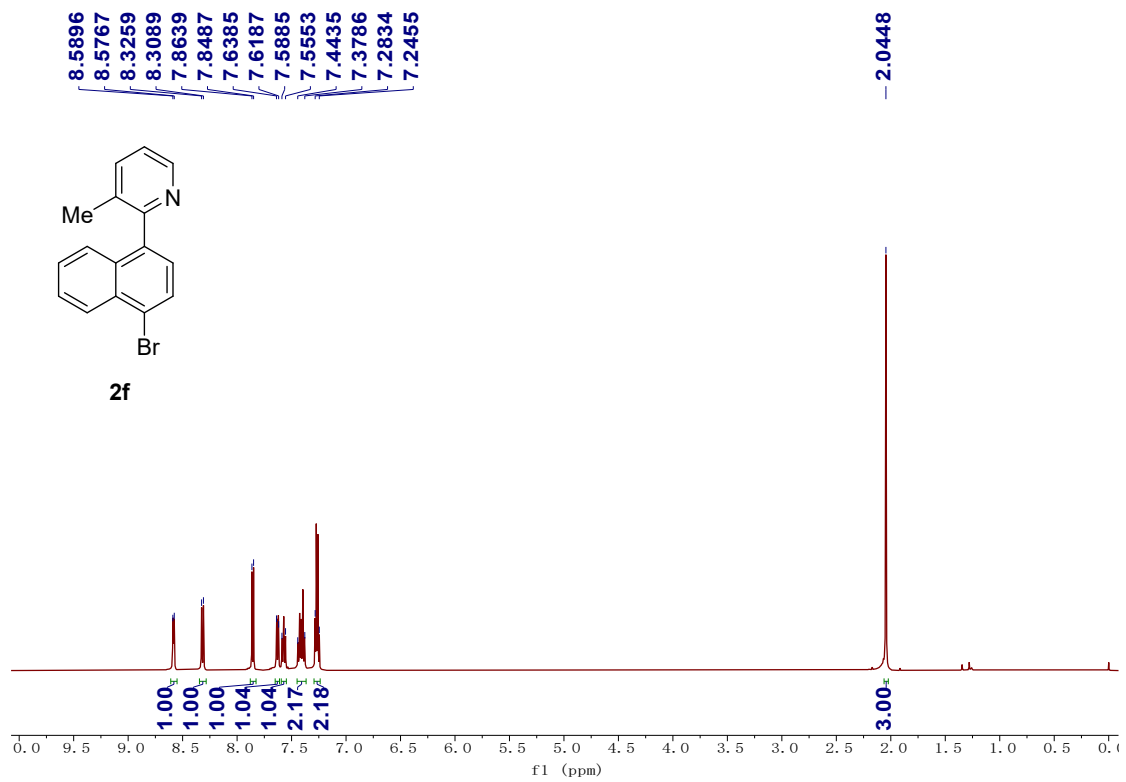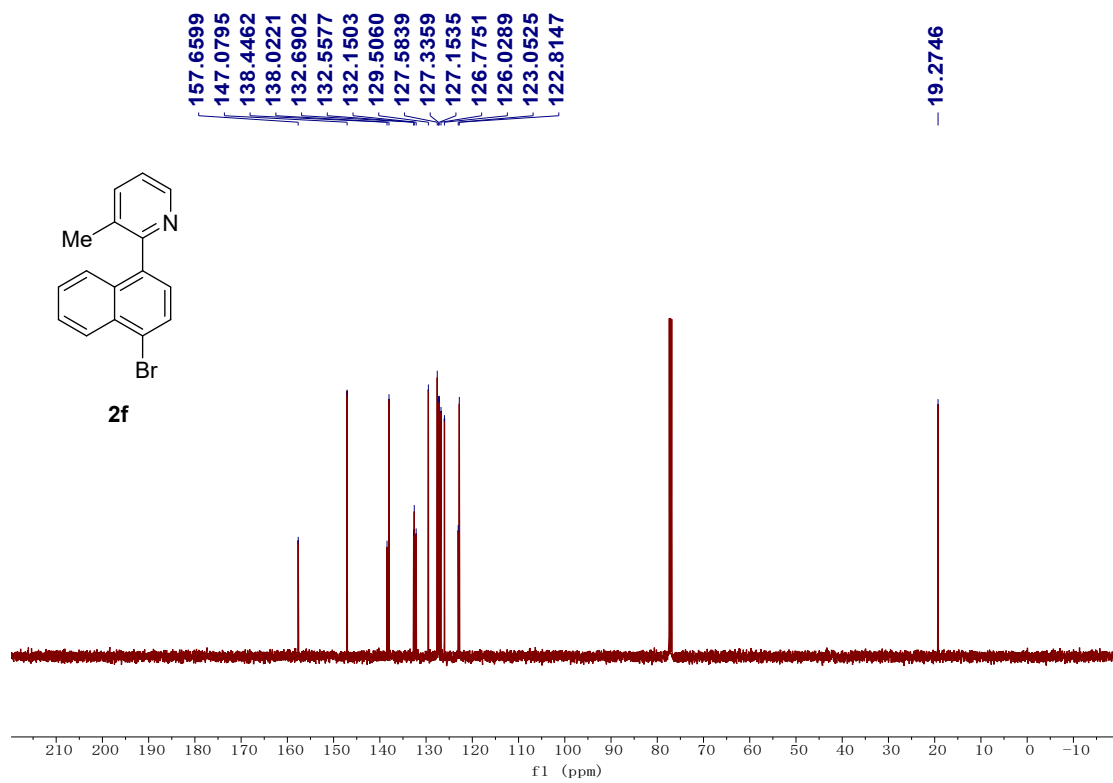

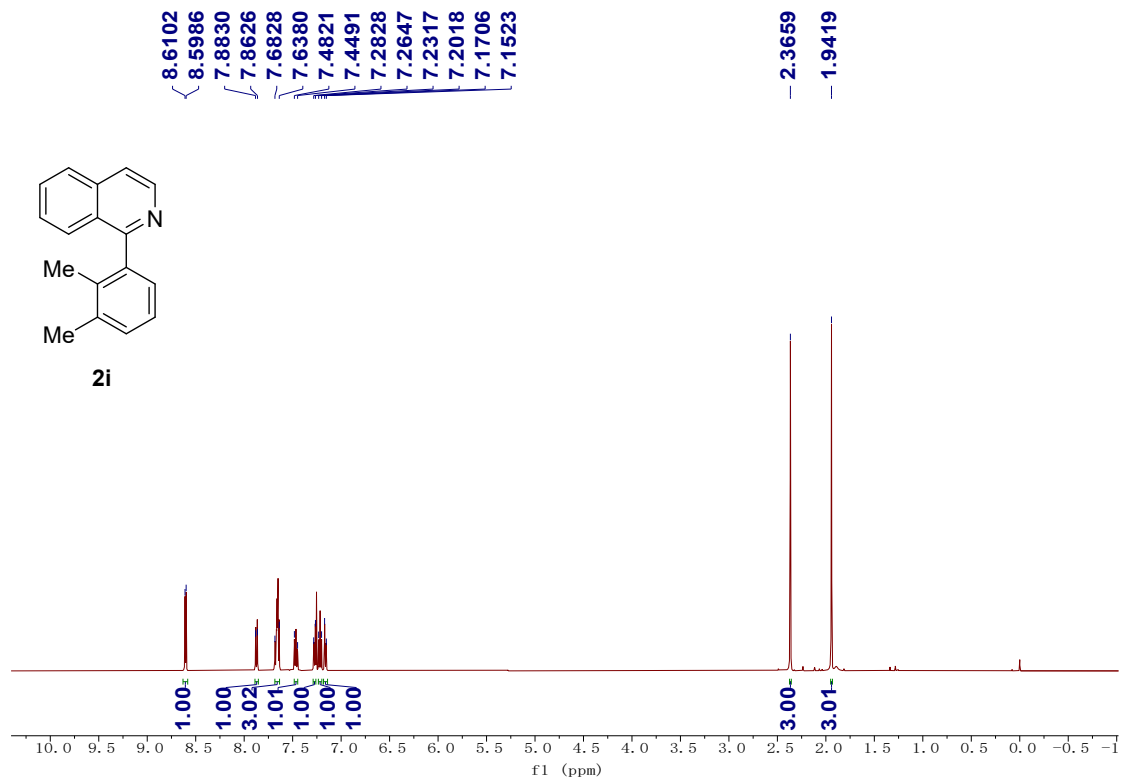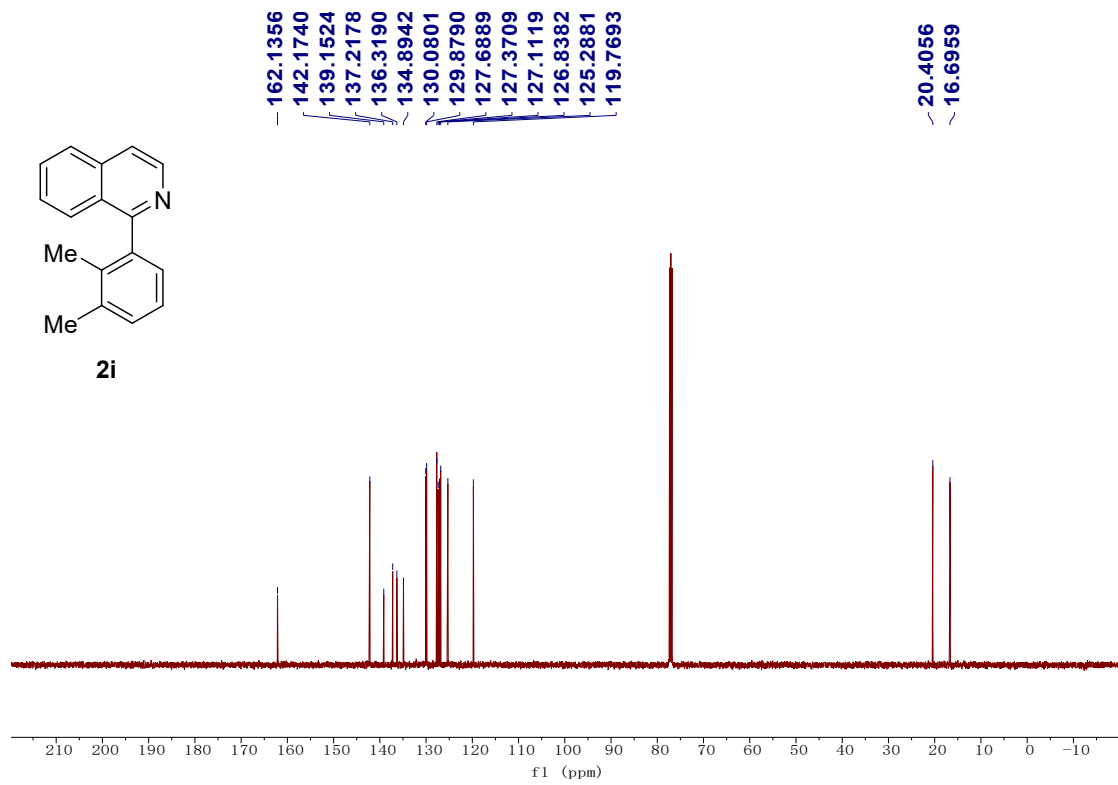

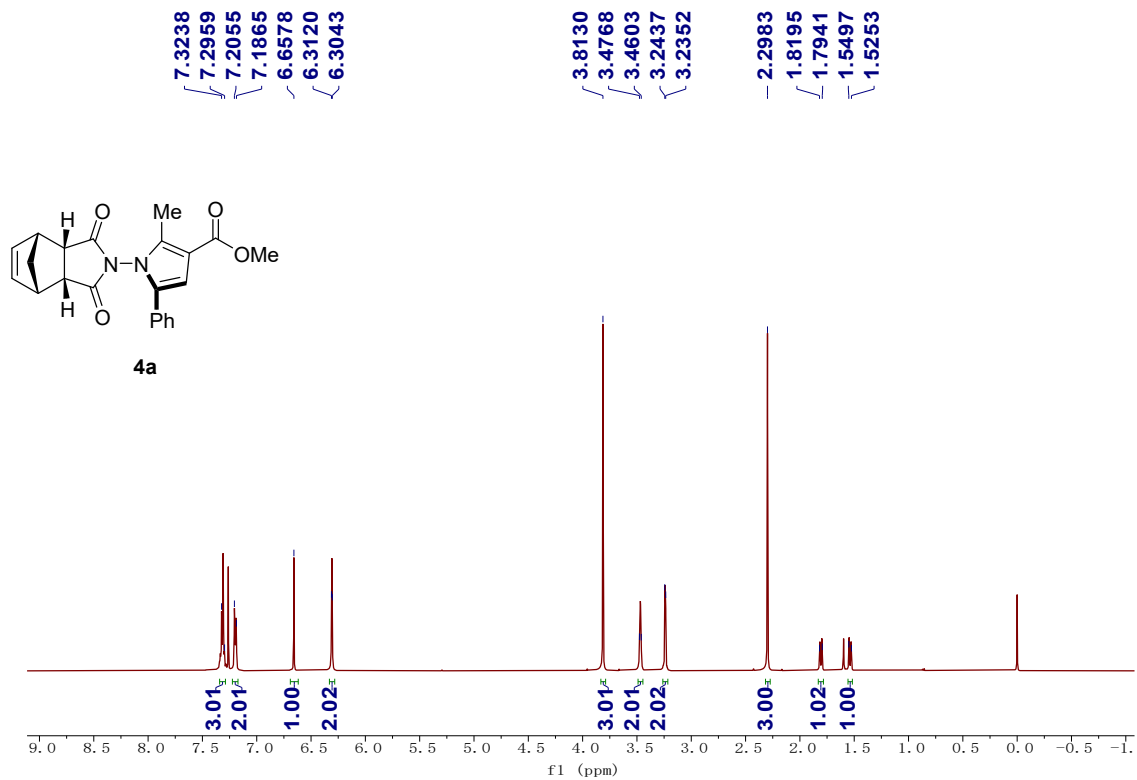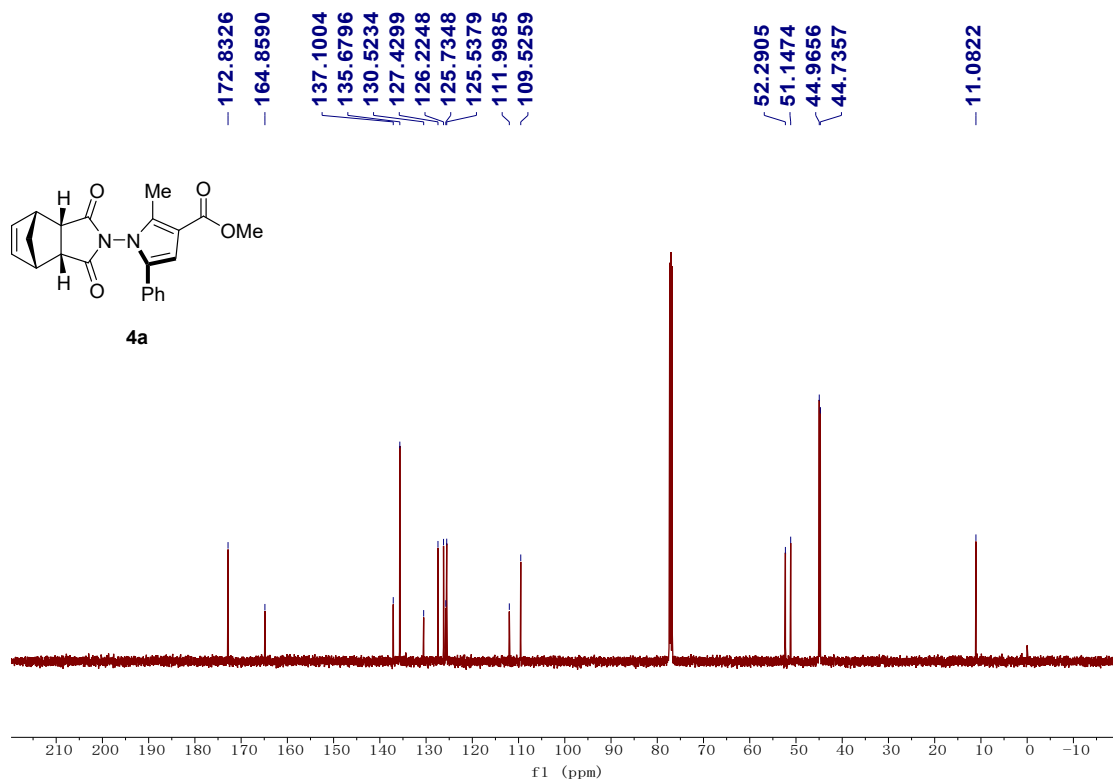



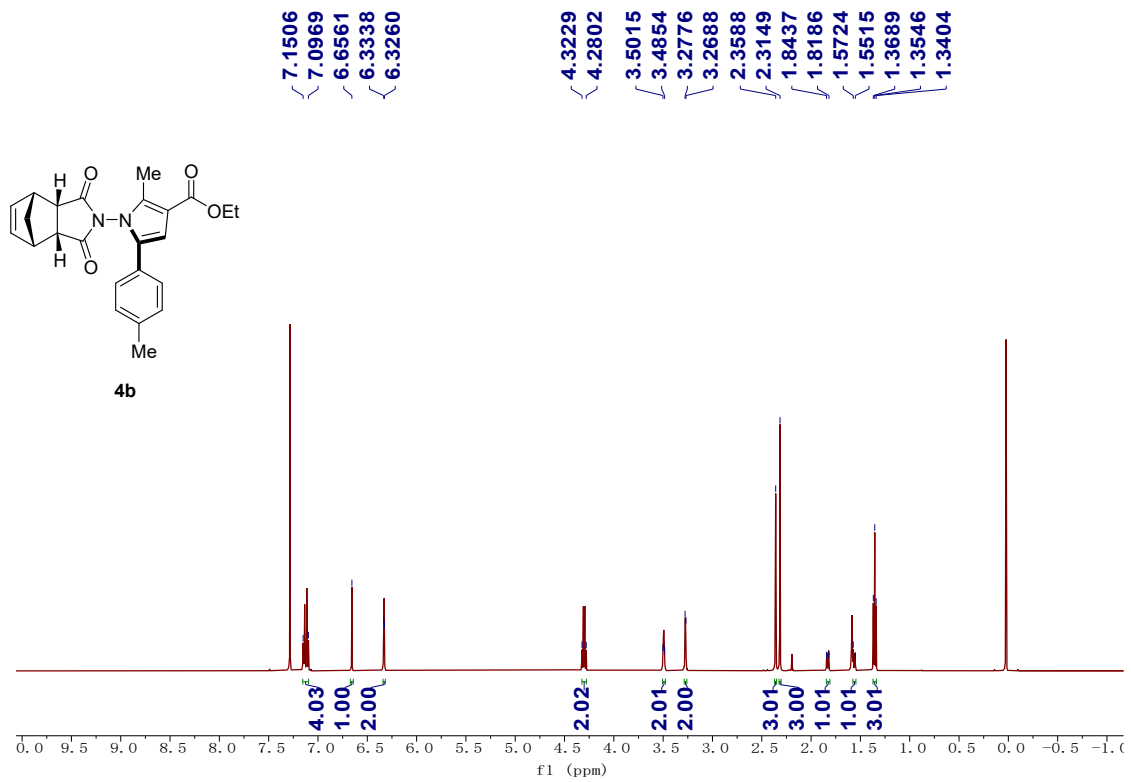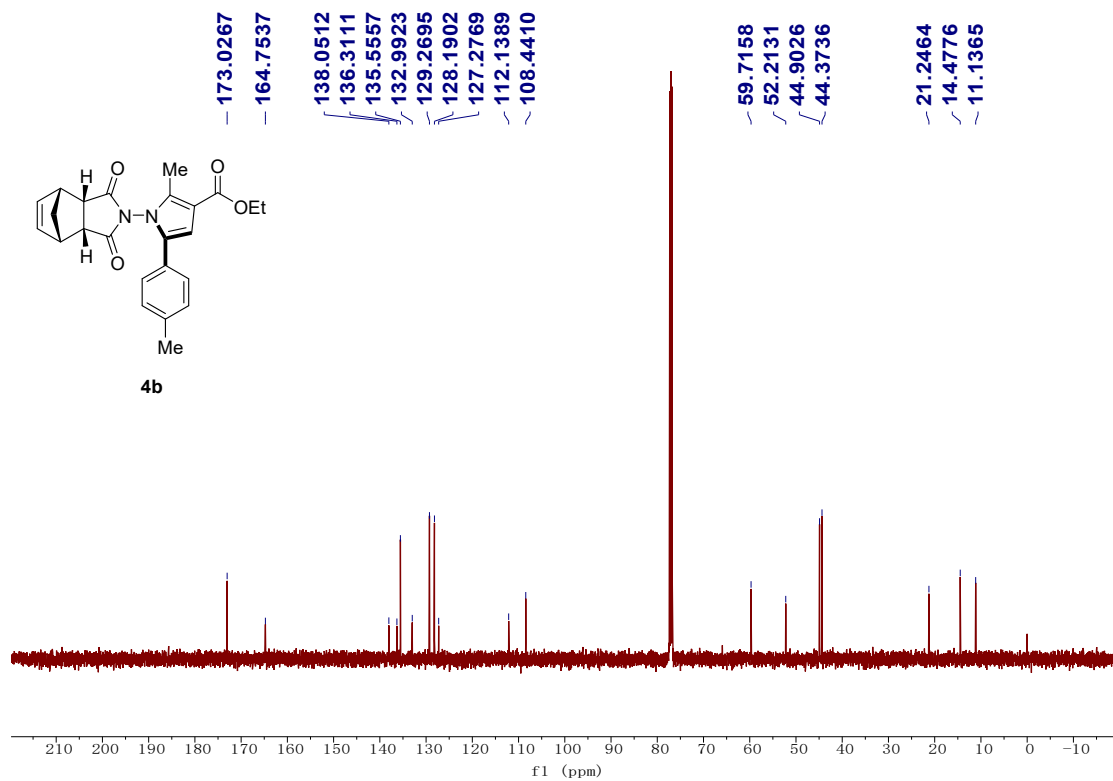

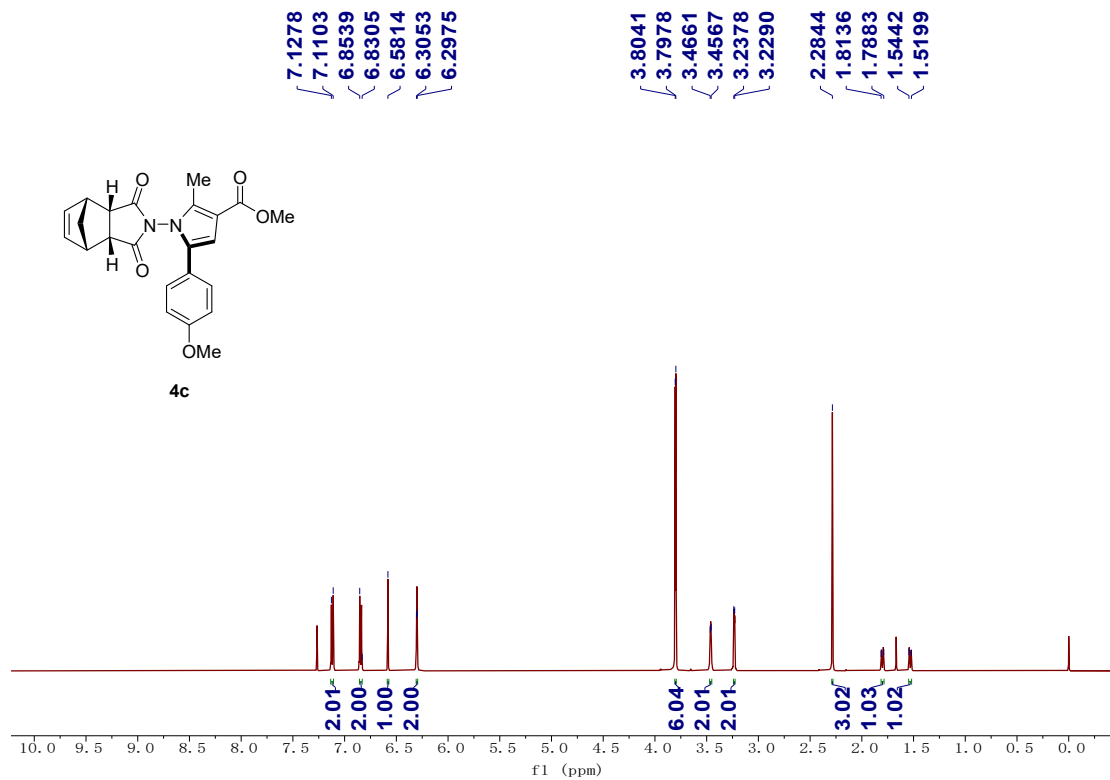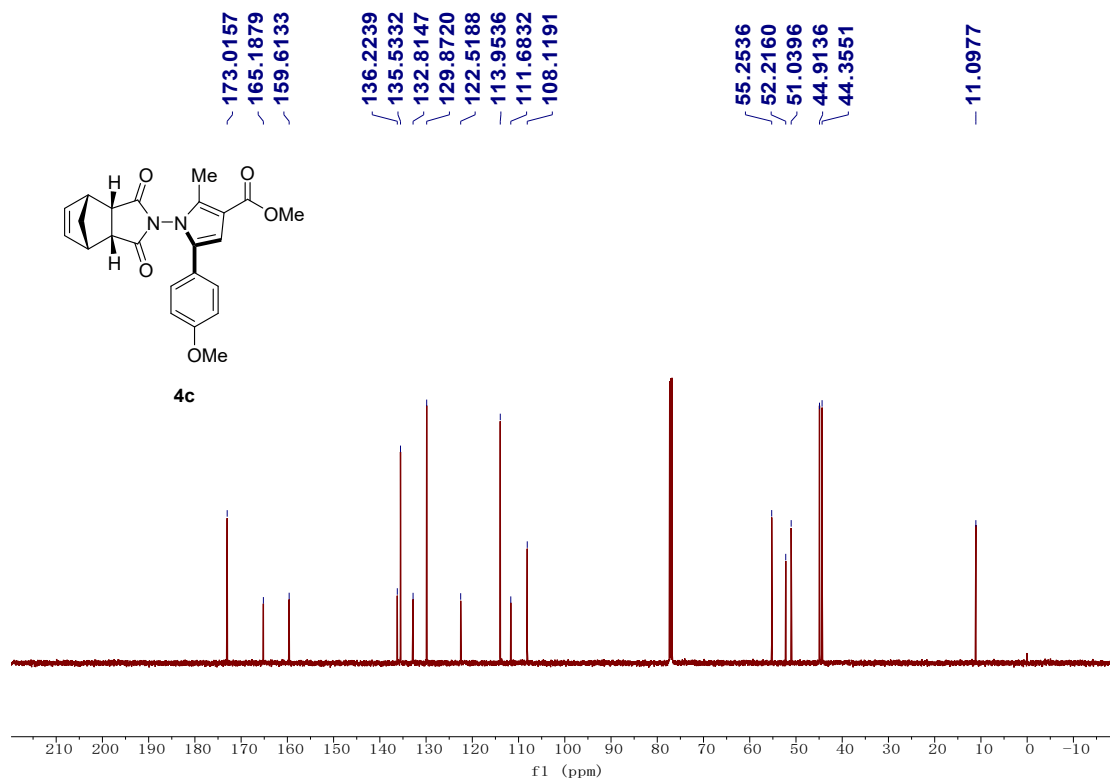

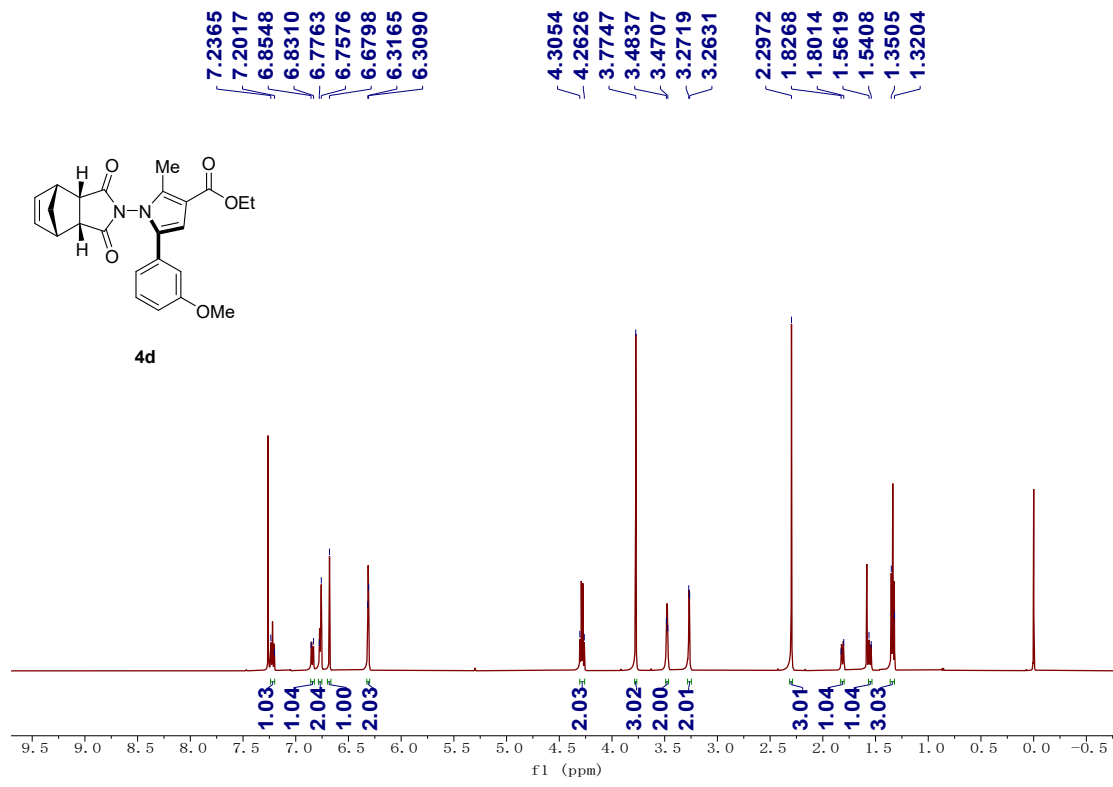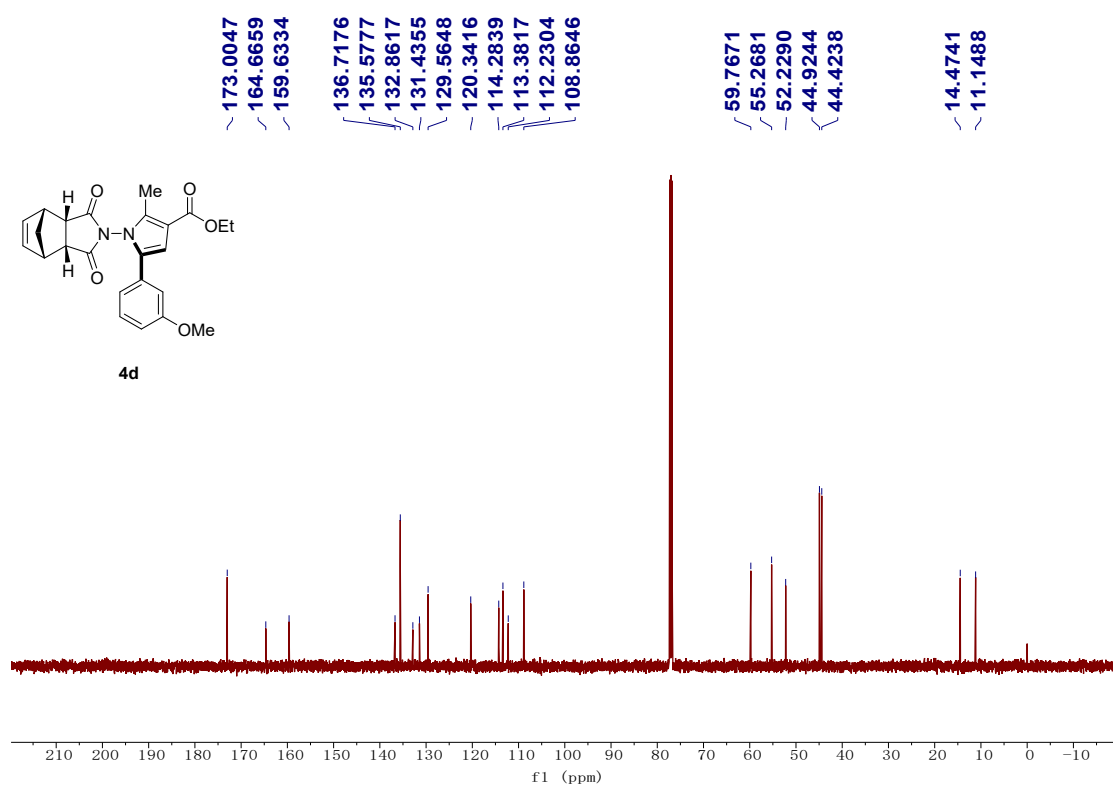

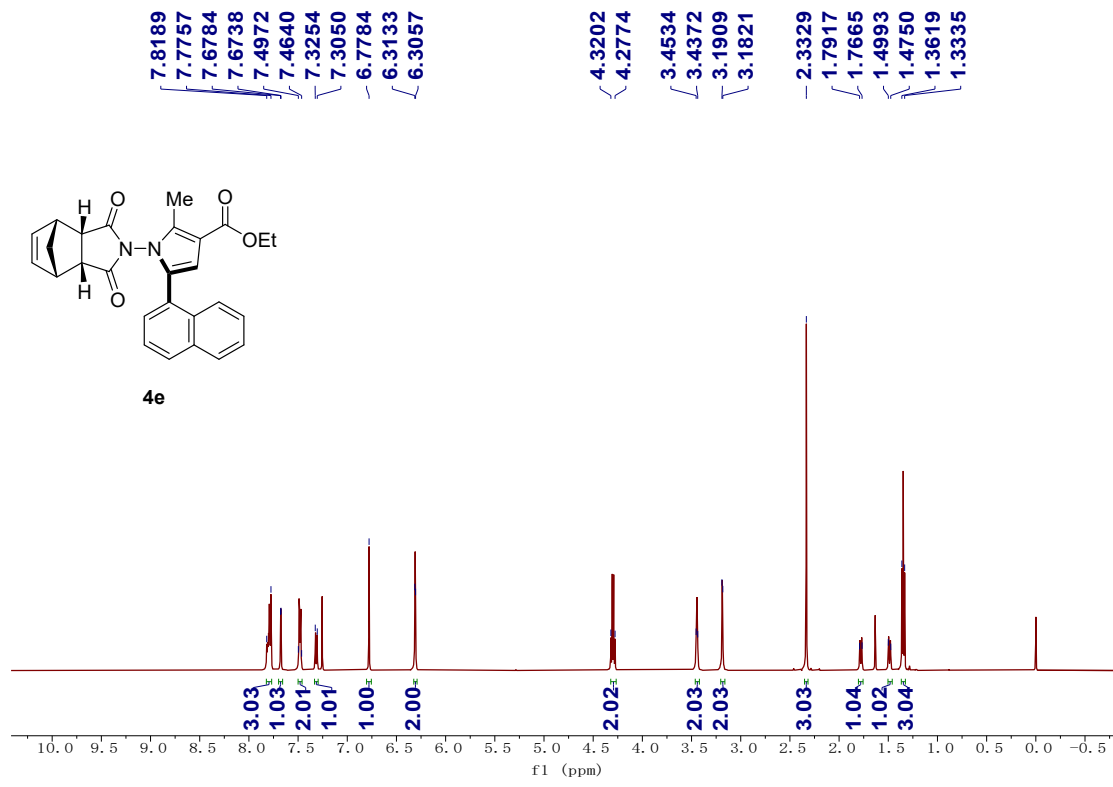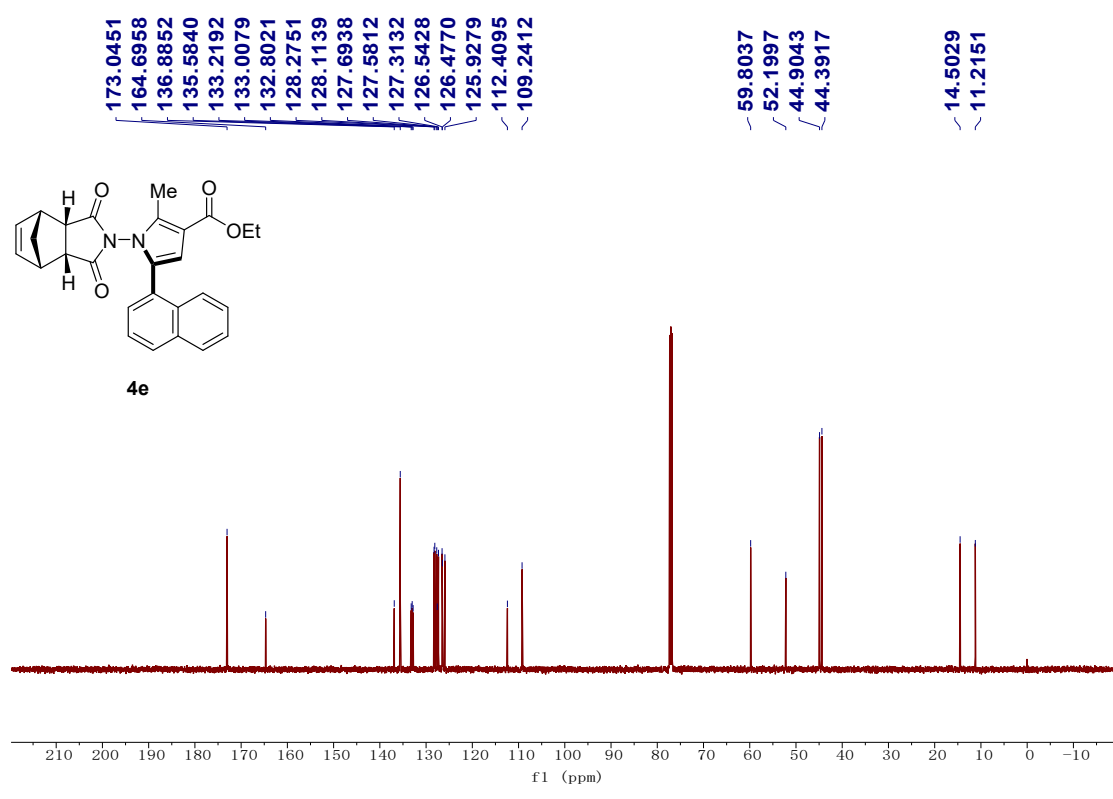

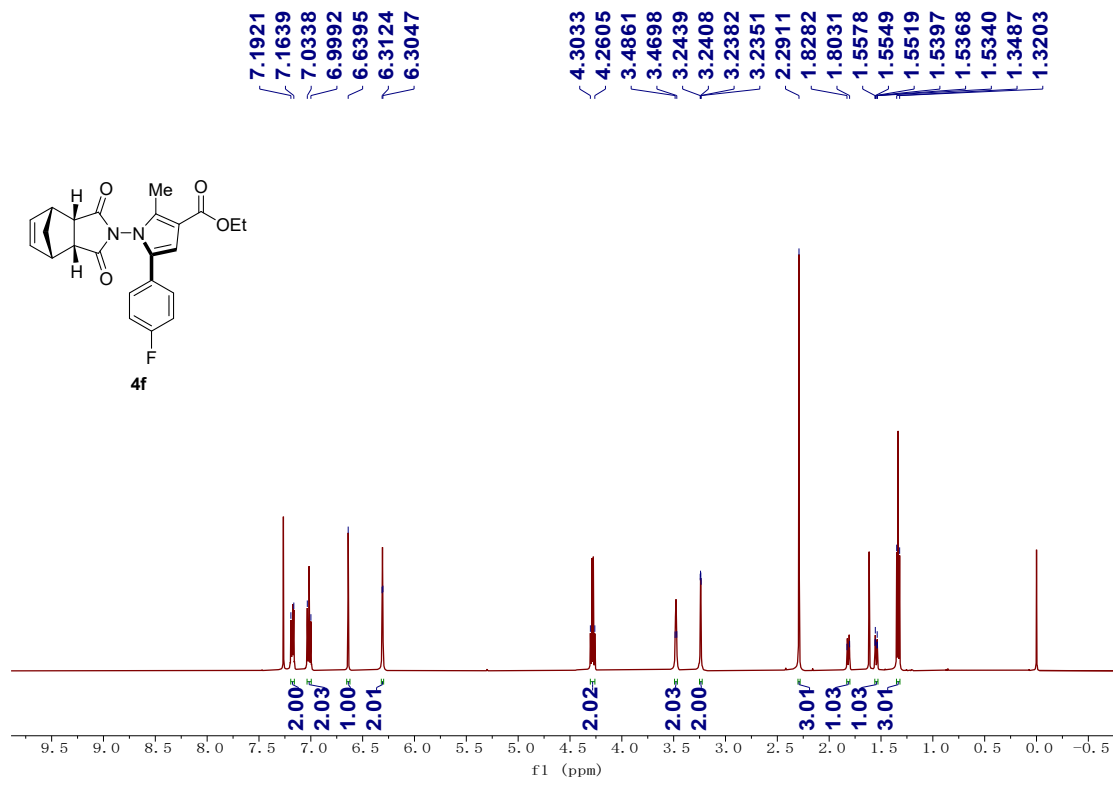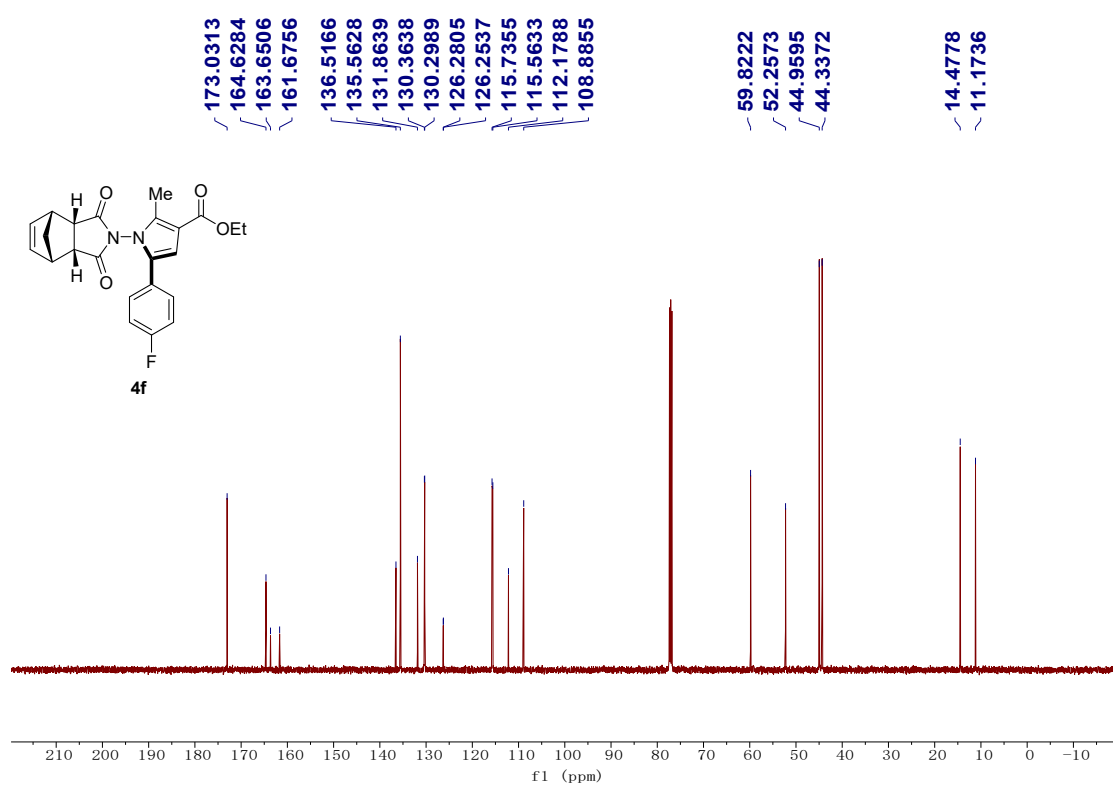

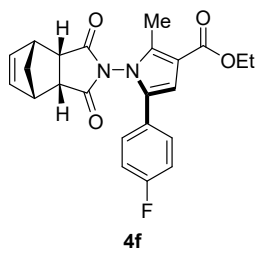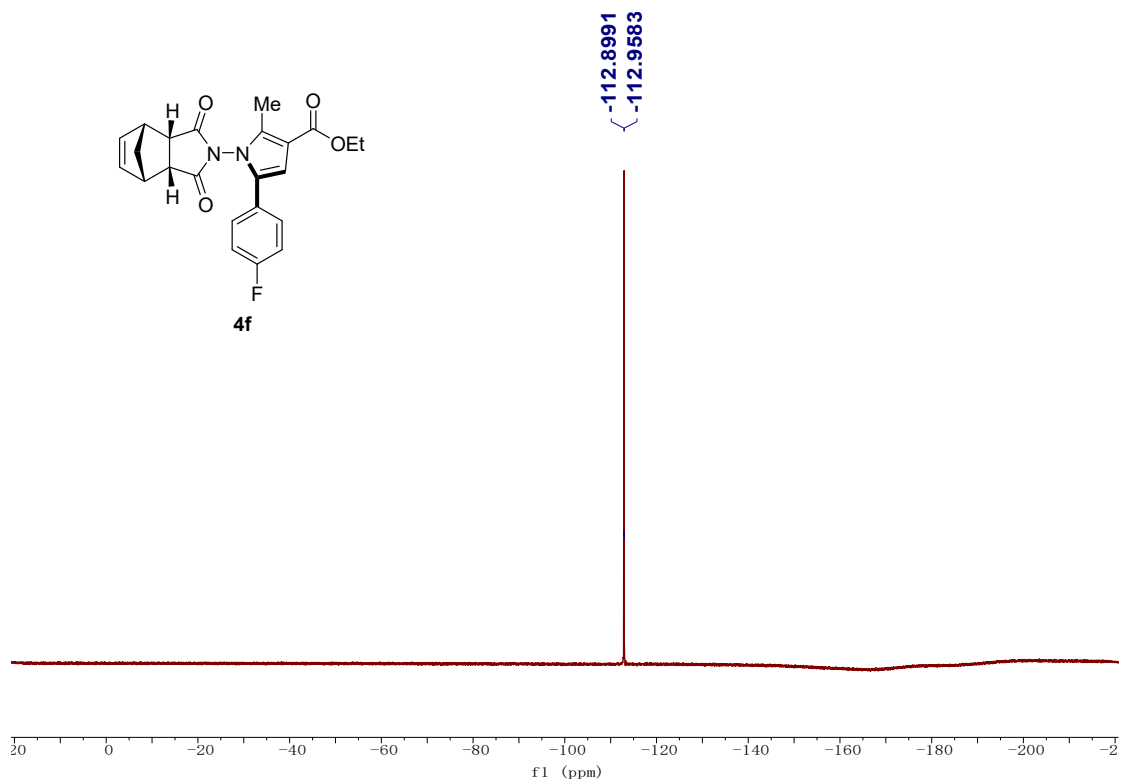

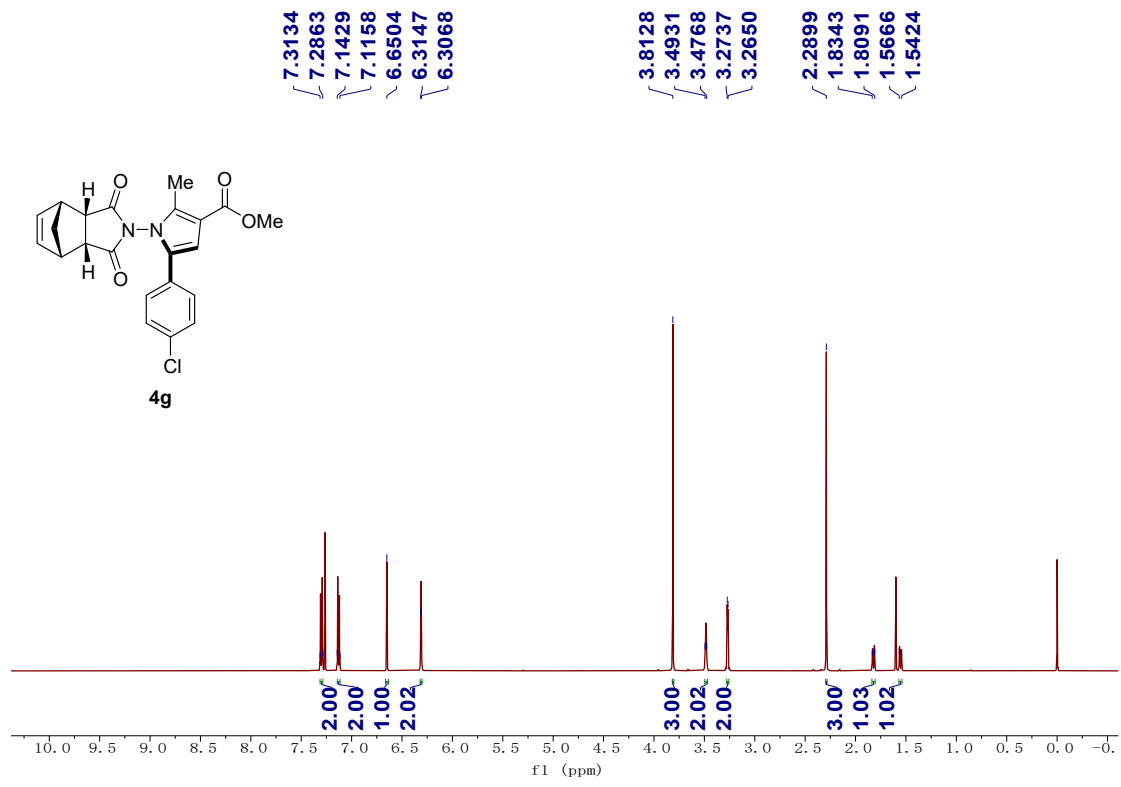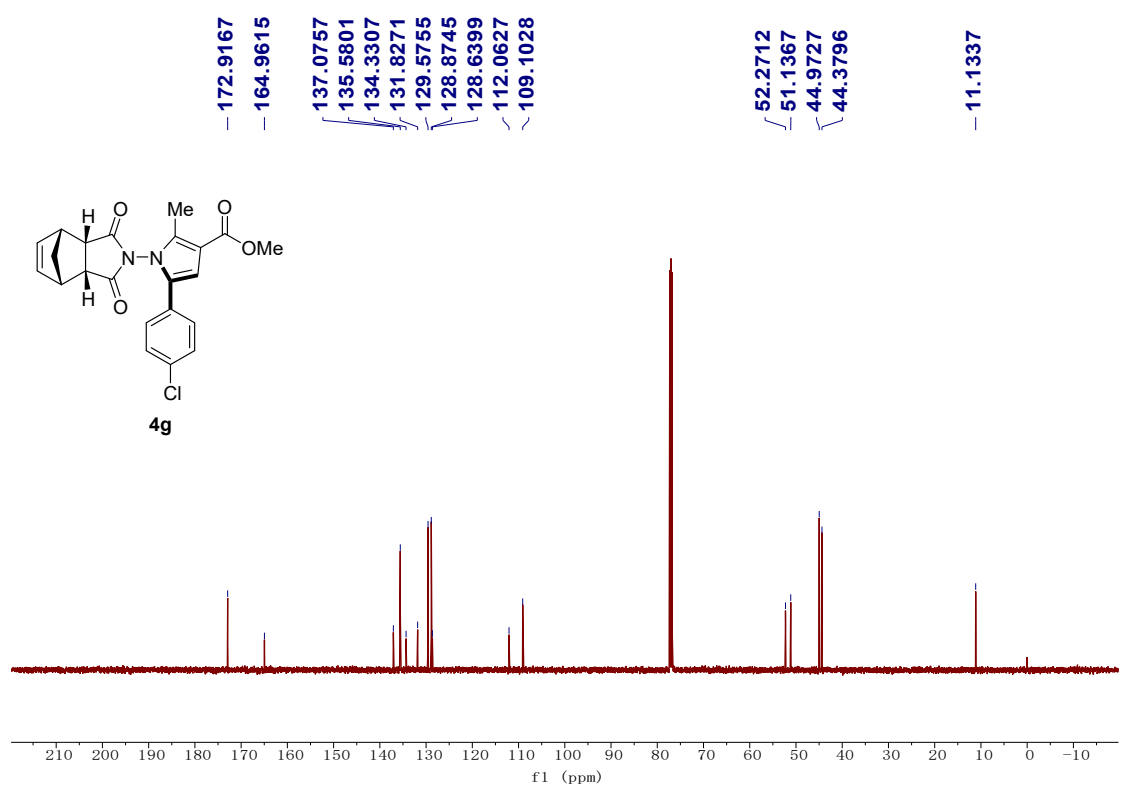

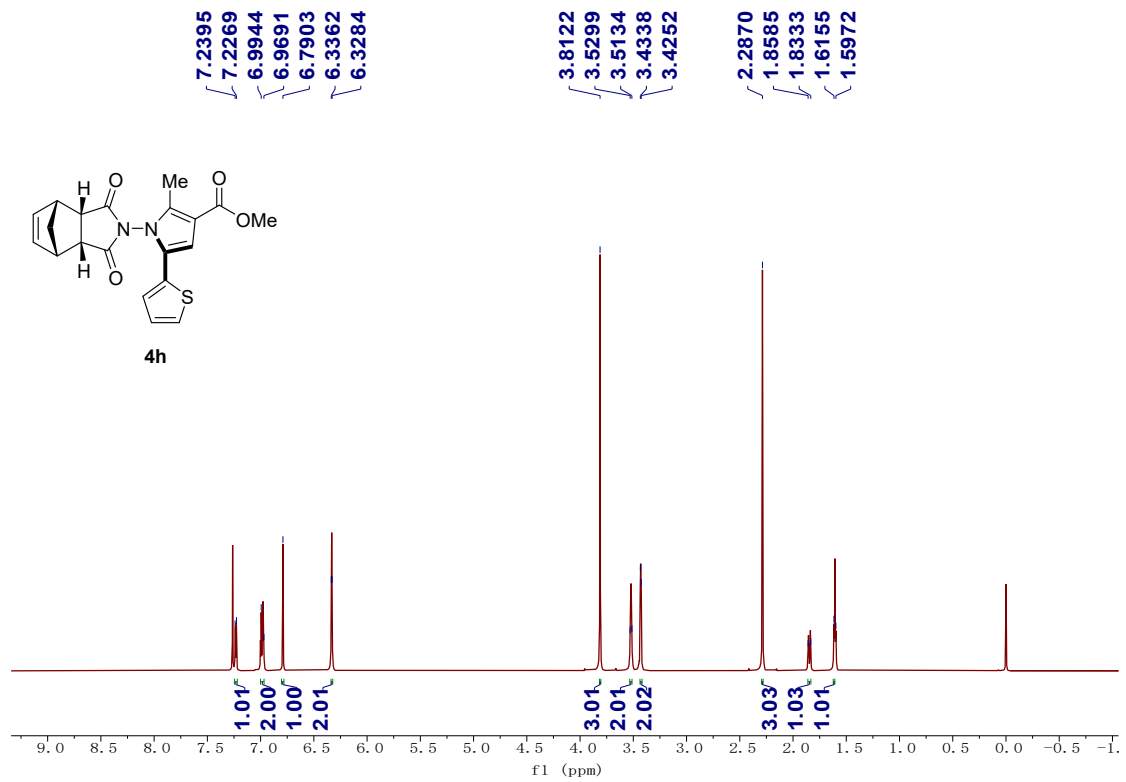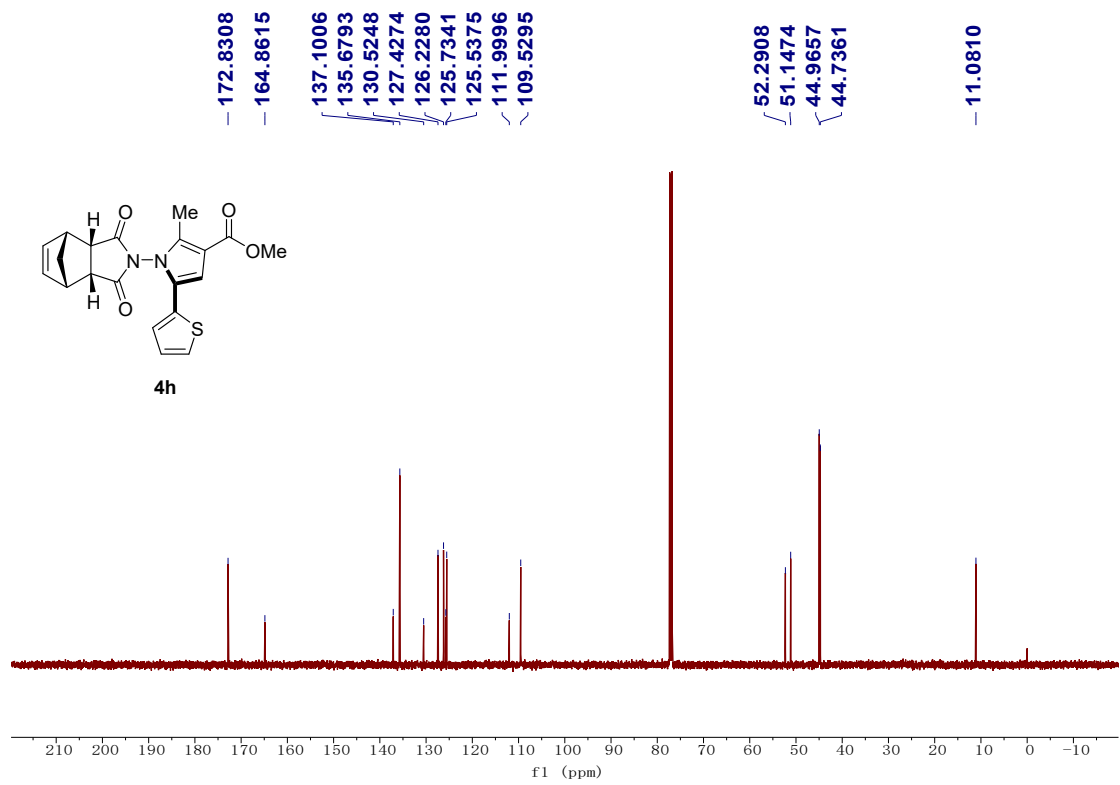



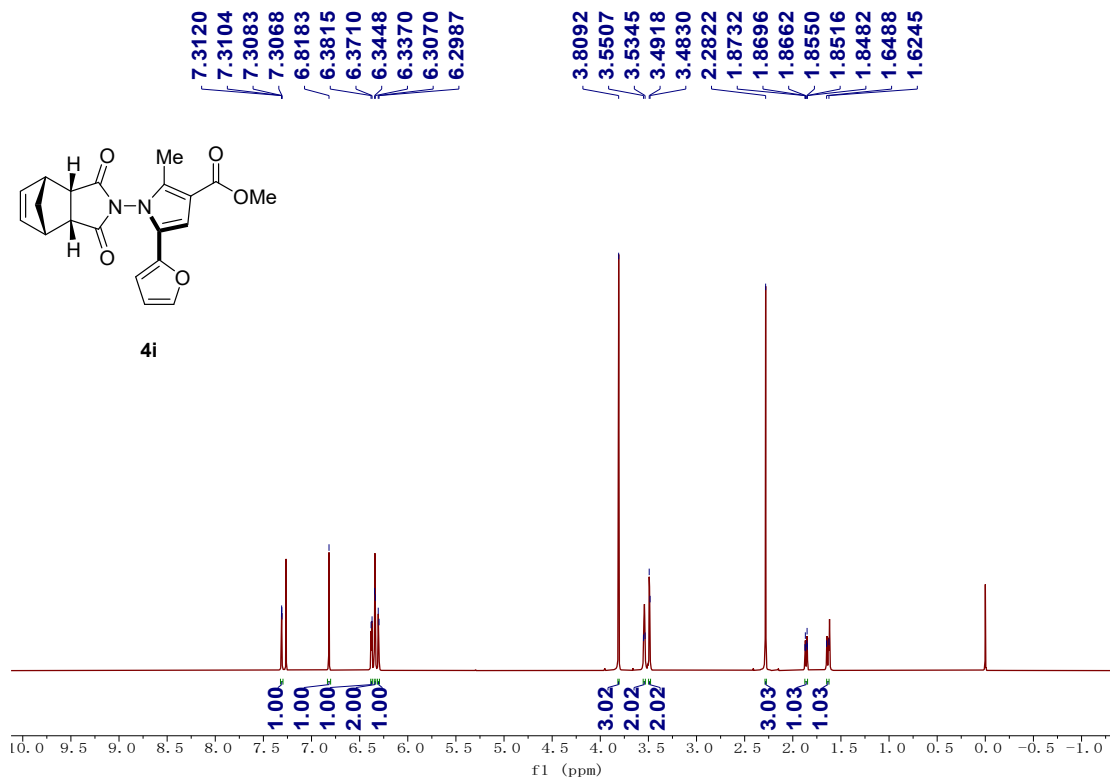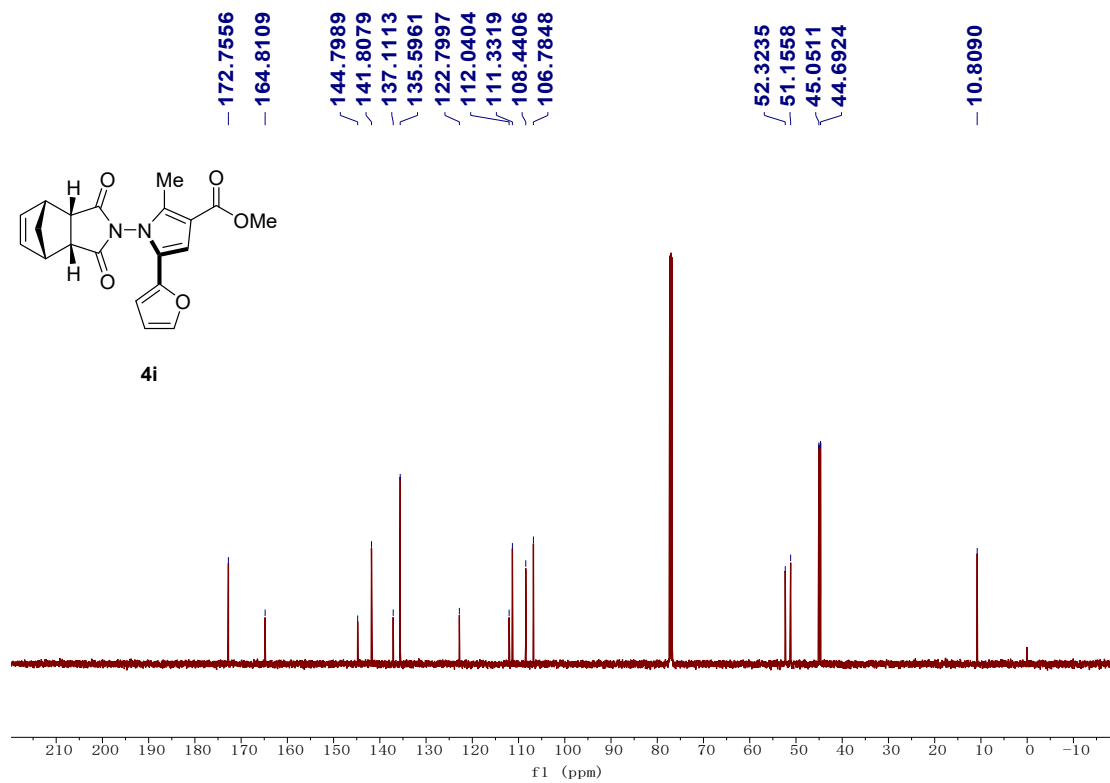

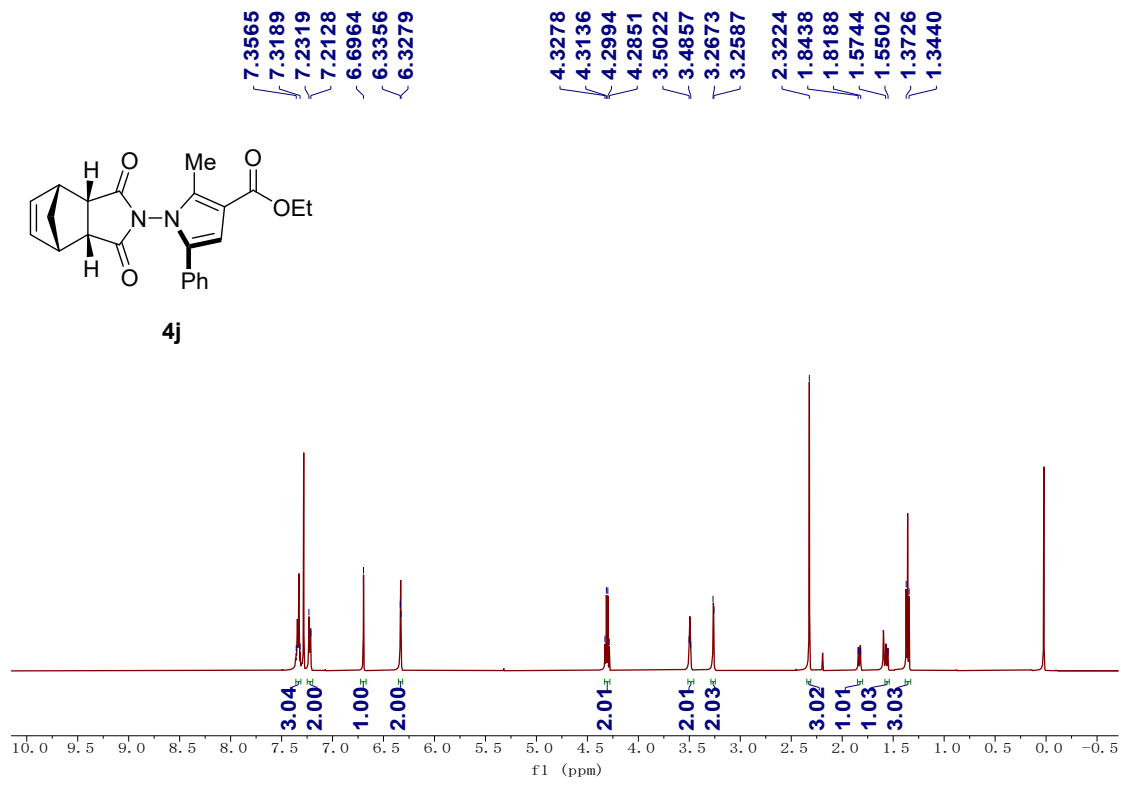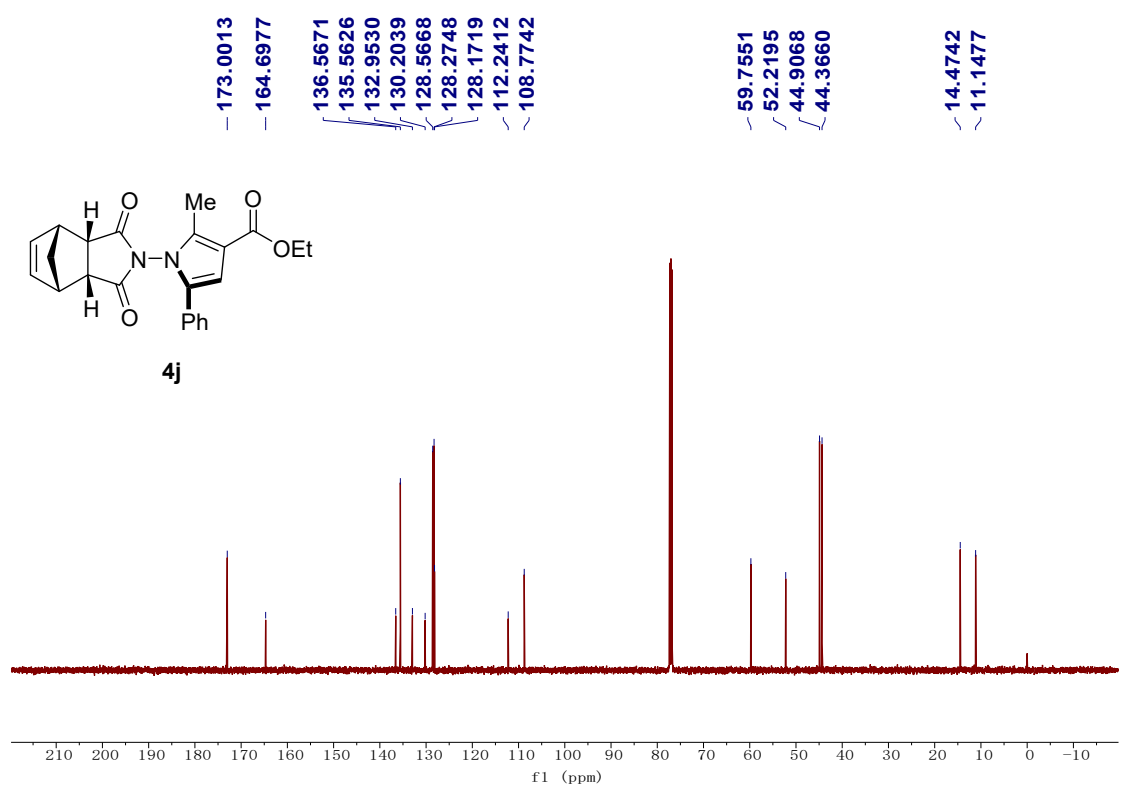

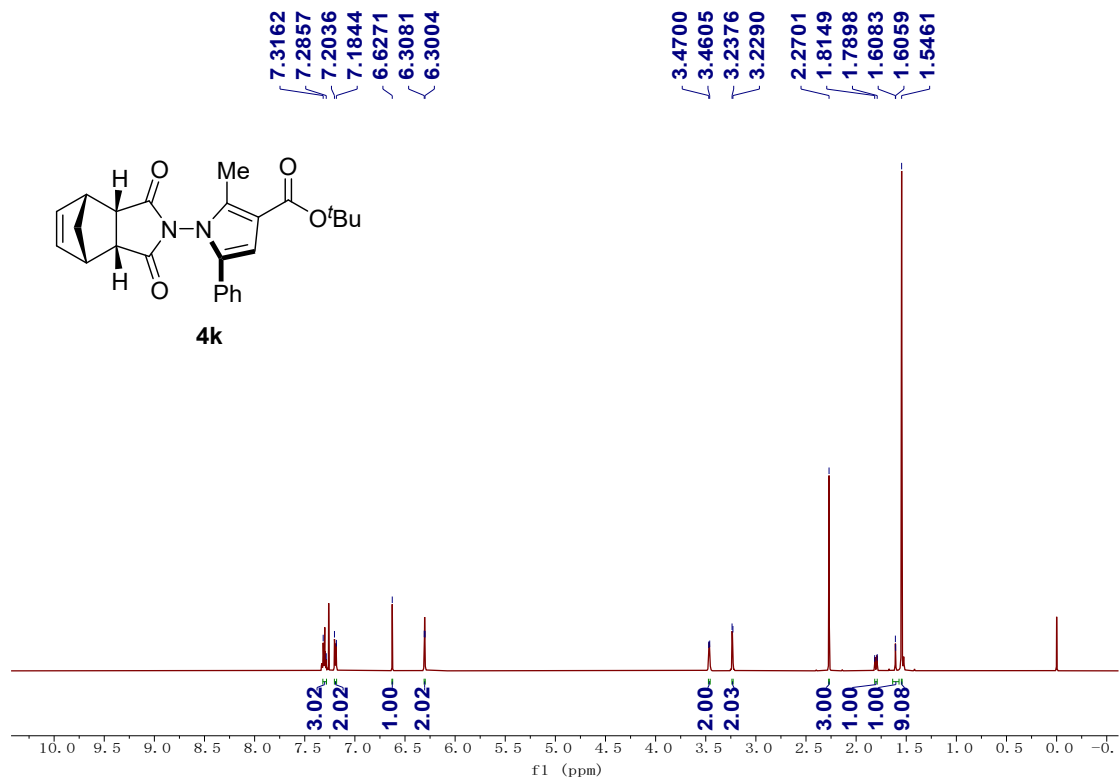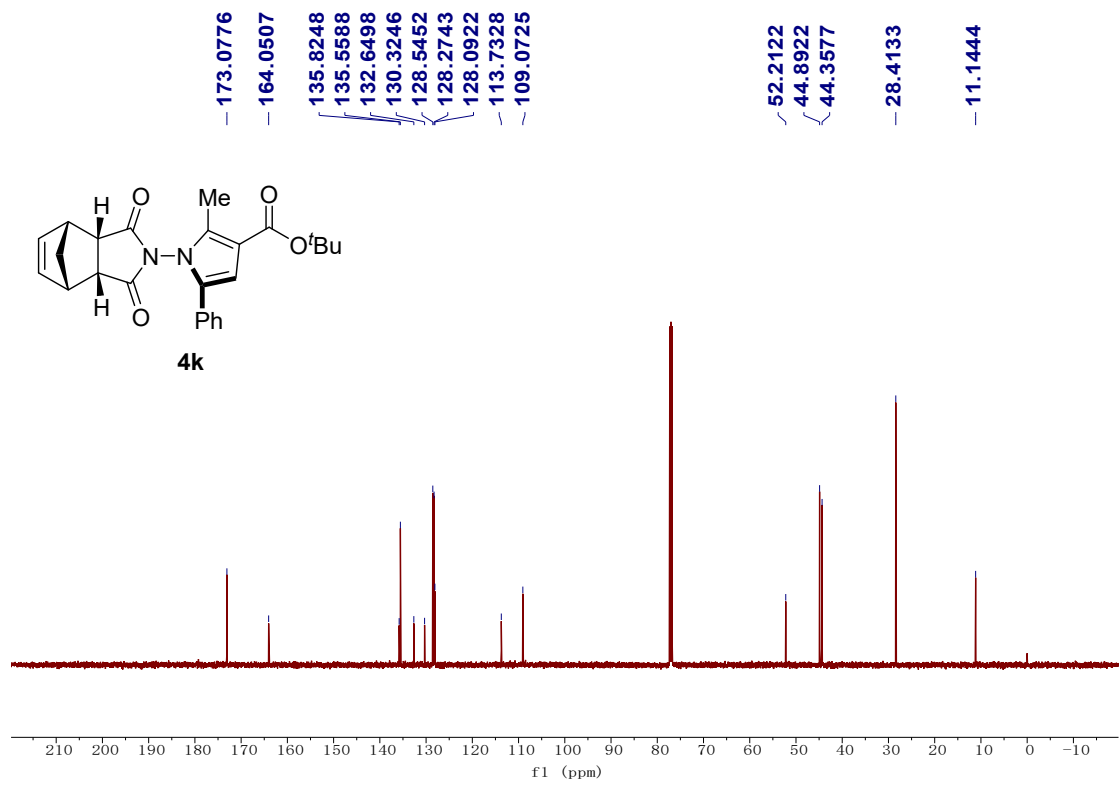

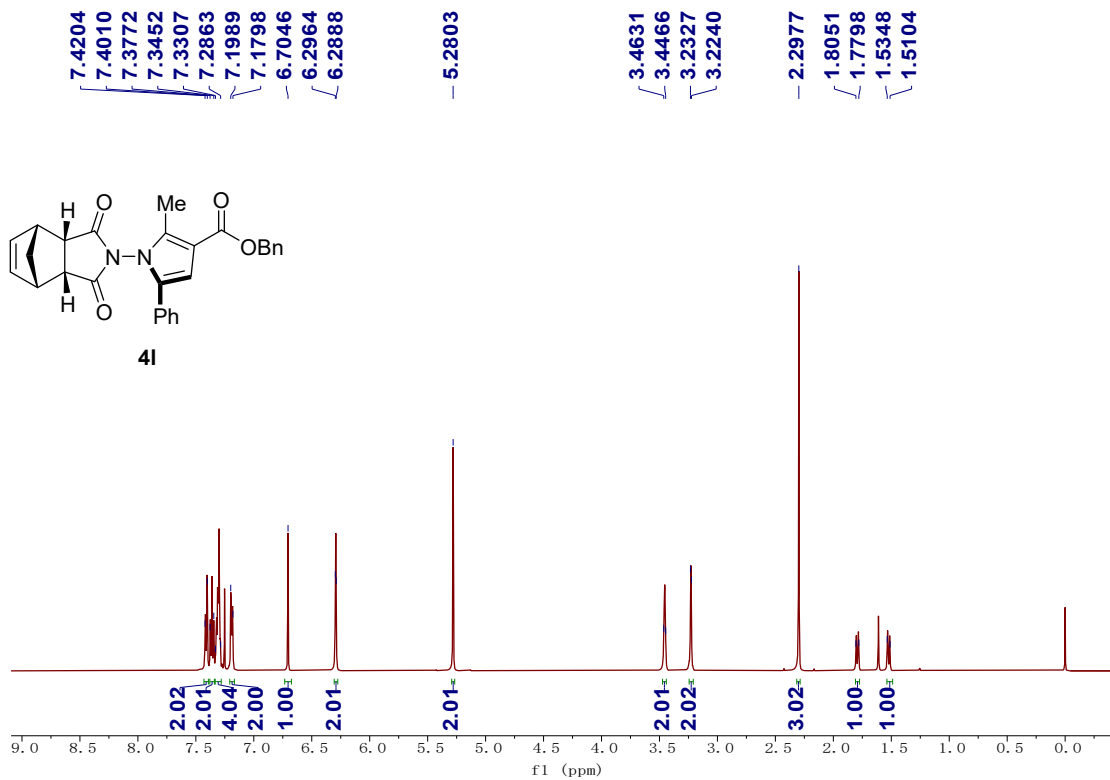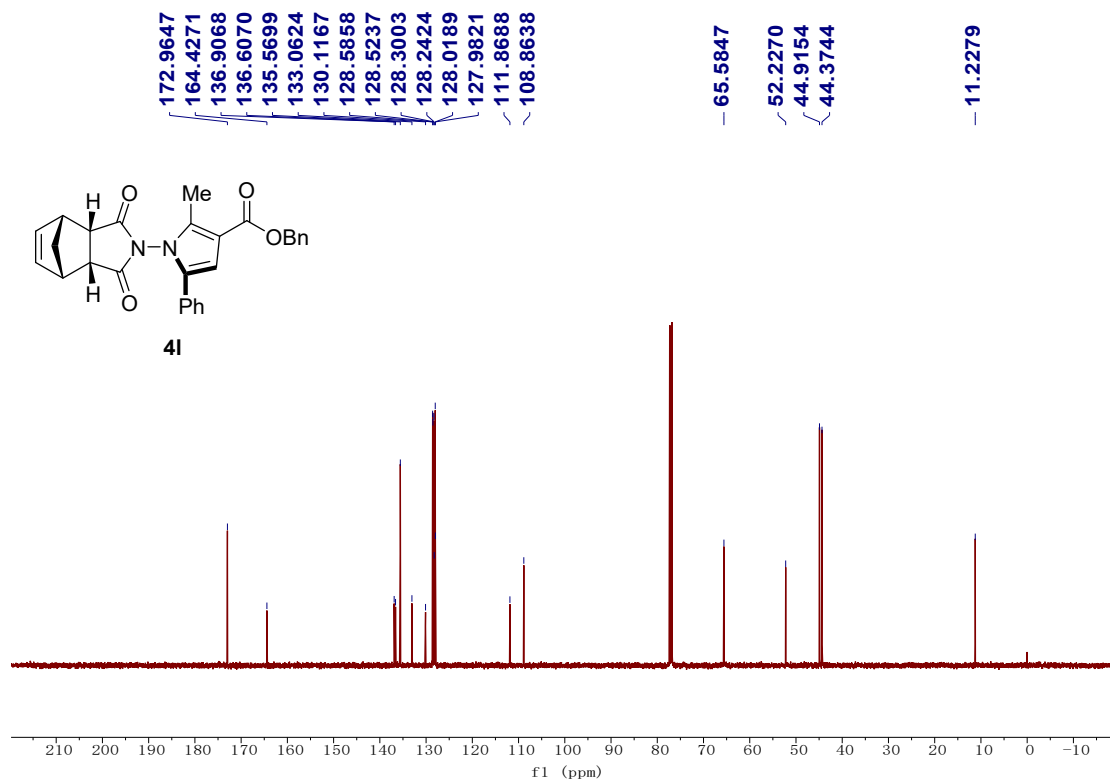

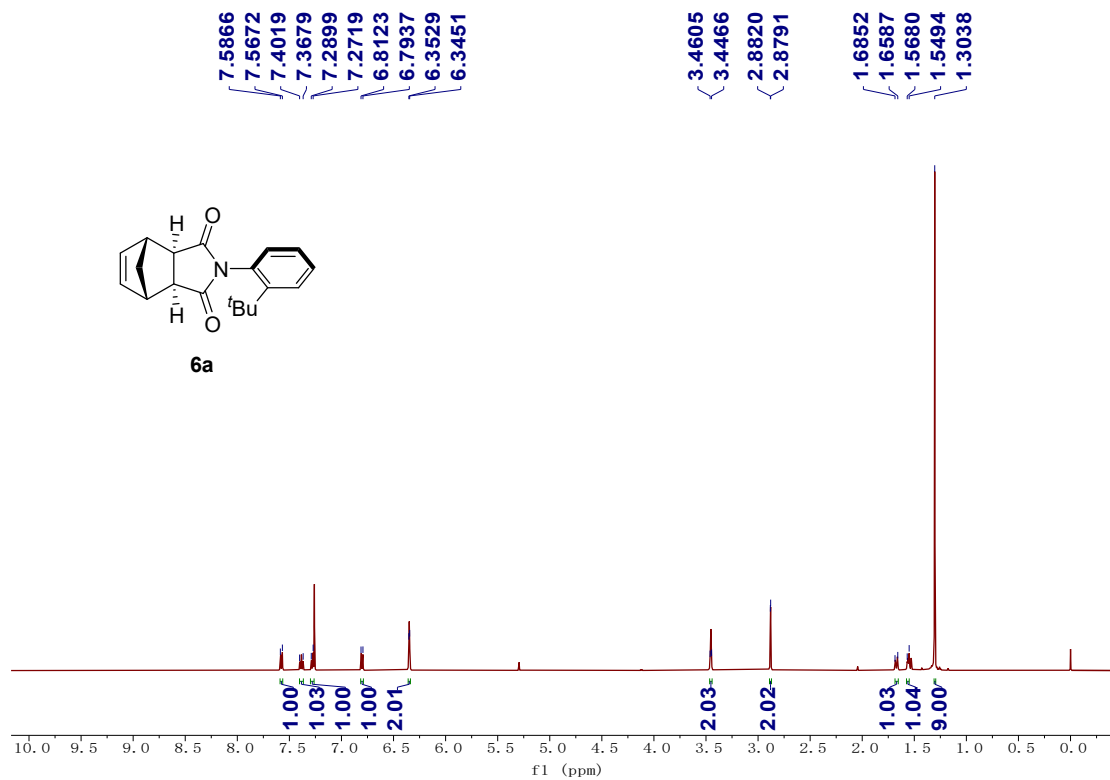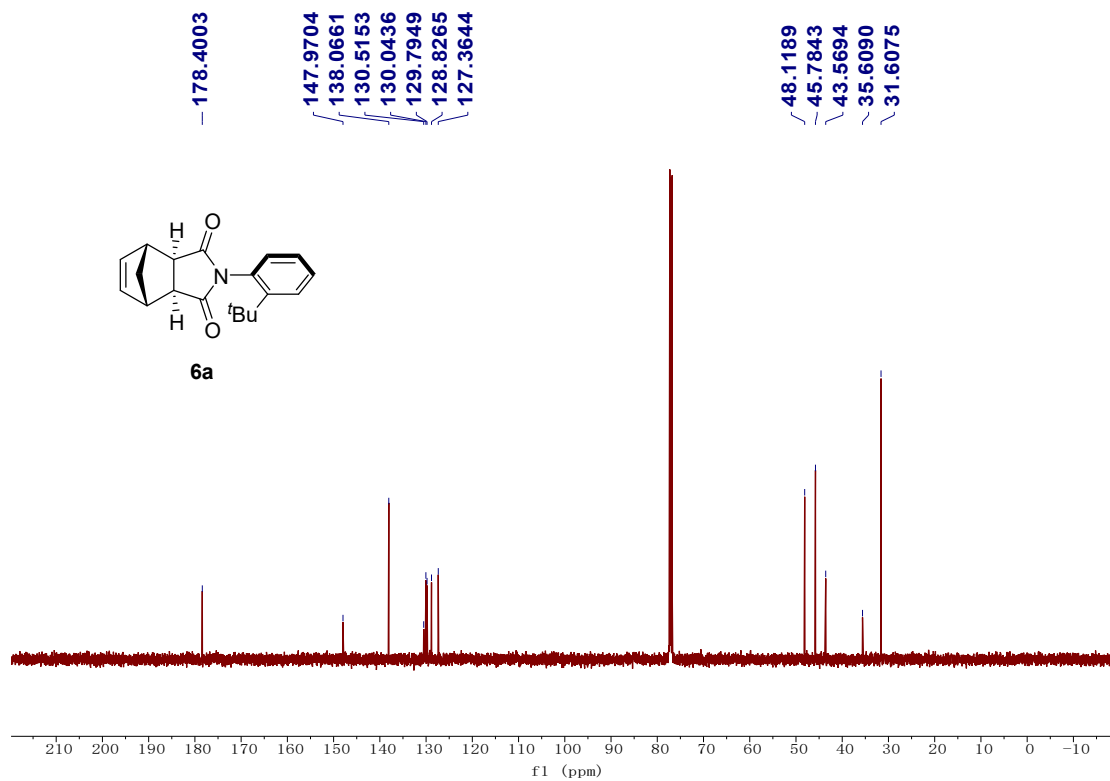

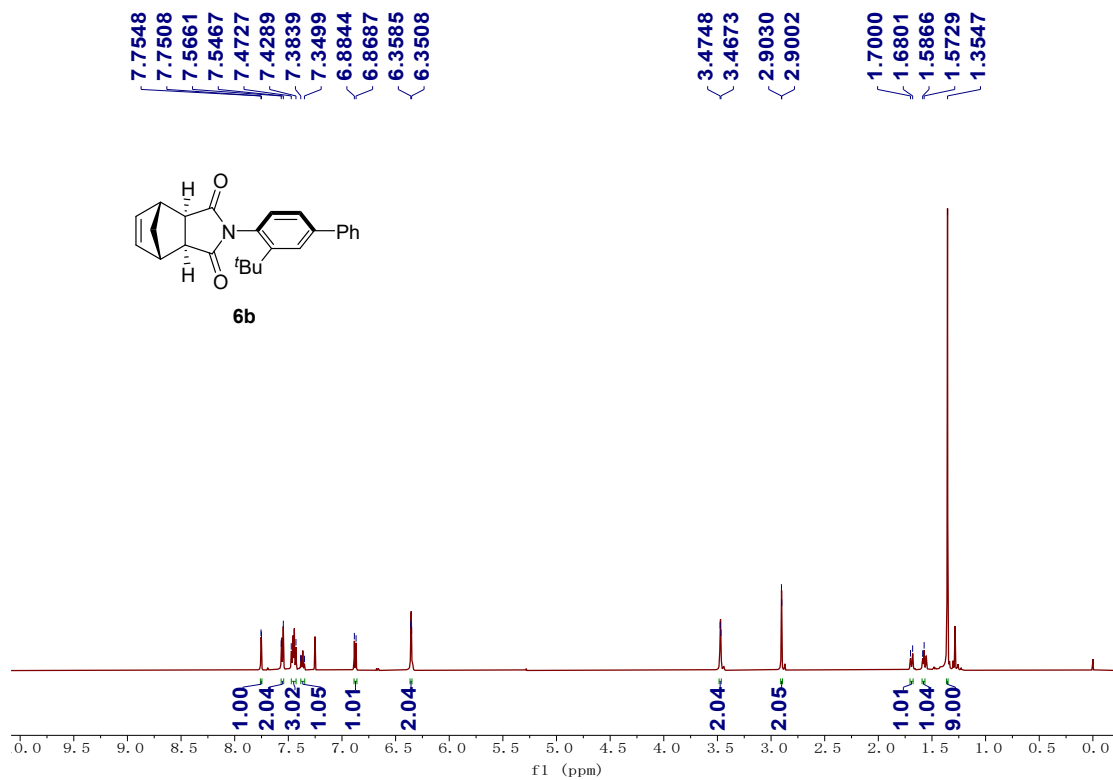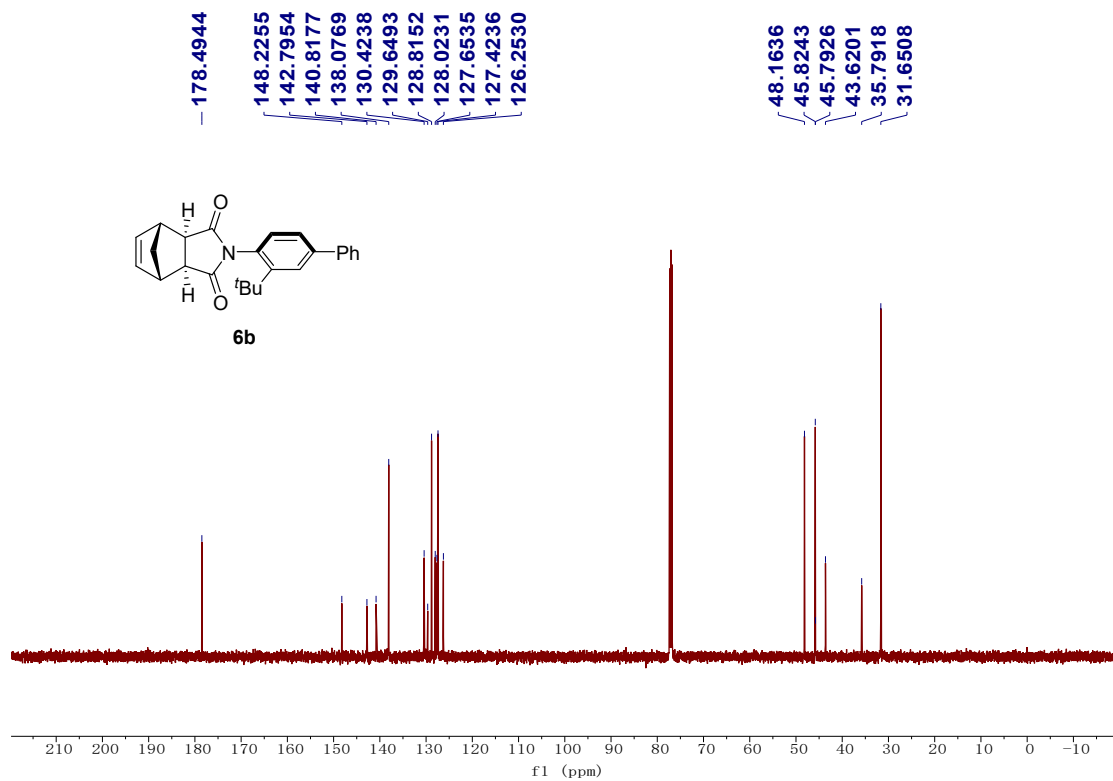

7.5286  
7.5194  
7.2881  
7.2657  
7.2507  
7.2267  
6.8613  
6.8400  
6.3674  
6.3598

3.4794  
3.4689  
2.9090  
2.9033  
2.3070  
1.7035  
1.6774  
1.5825  
1.5592  
1.3300

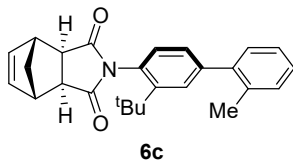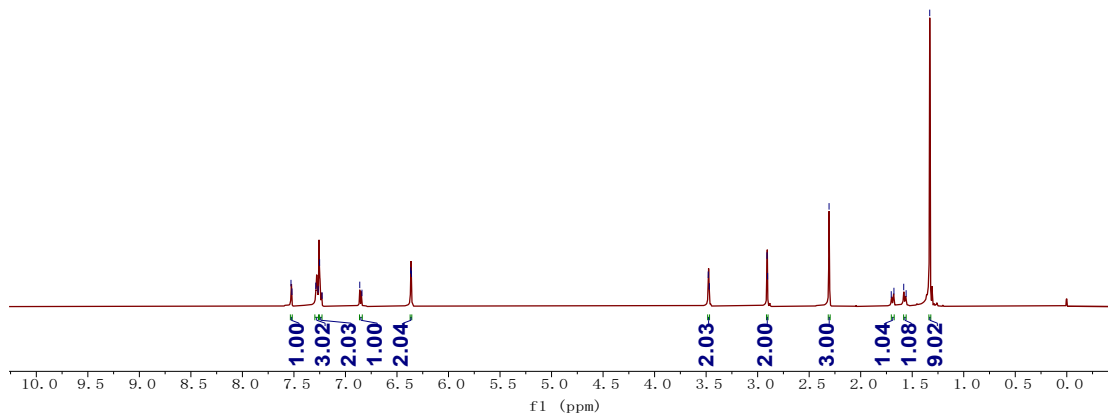

178.5411  
147.5656  
143.1056  
141.2123  
138.0840  
135.4081  
130.4805  
130.0169  
129.8572  
129.7341  
129.1007  
128.0672  
127.5759  
125.8882

48.1336  
45.8535  
43.5810  
35.7739  
31.6769  
20.5658

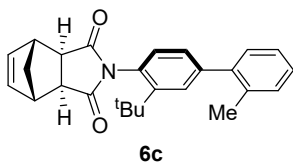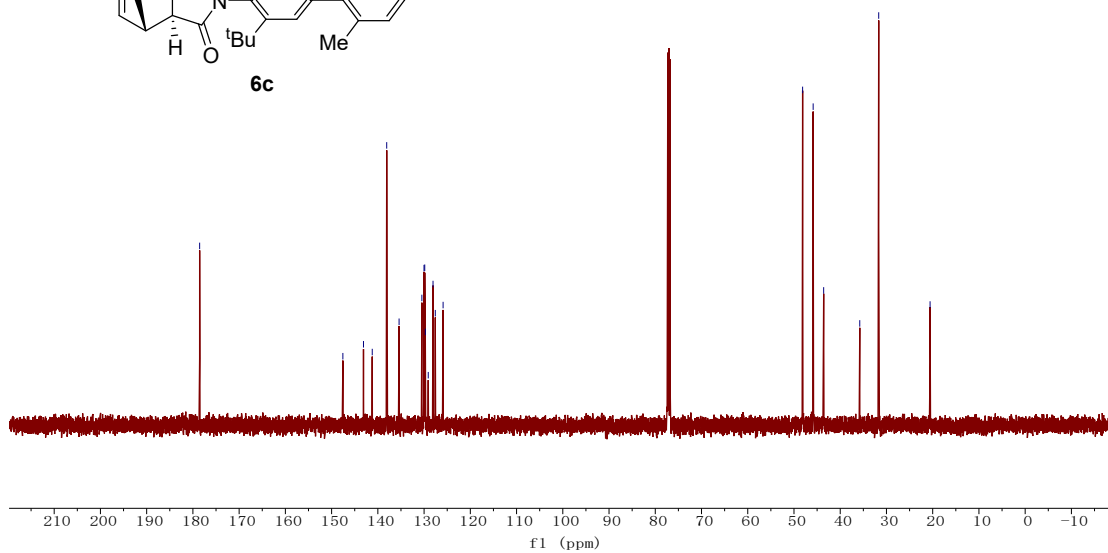

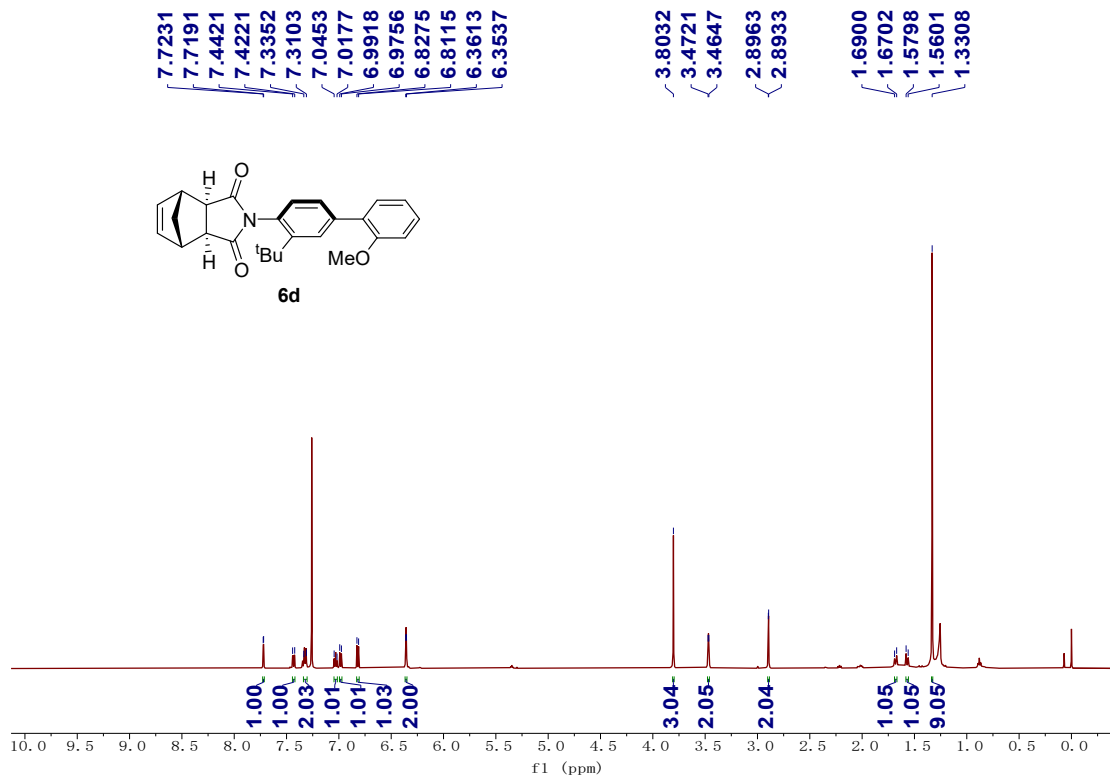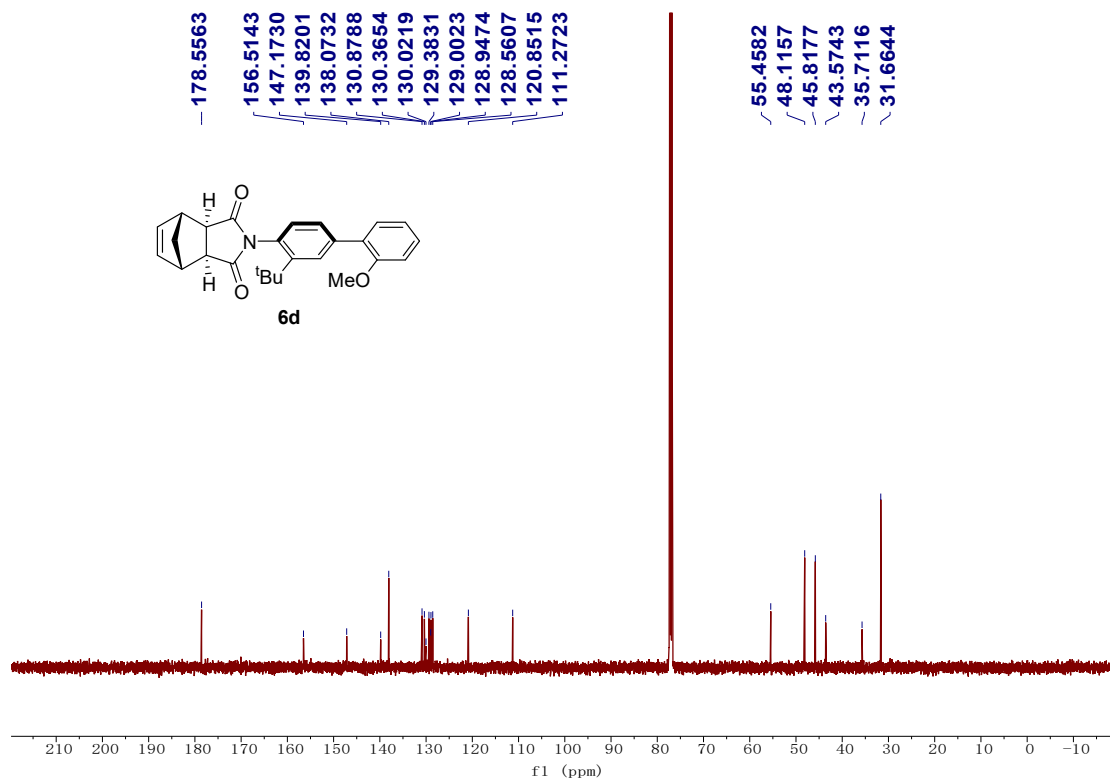



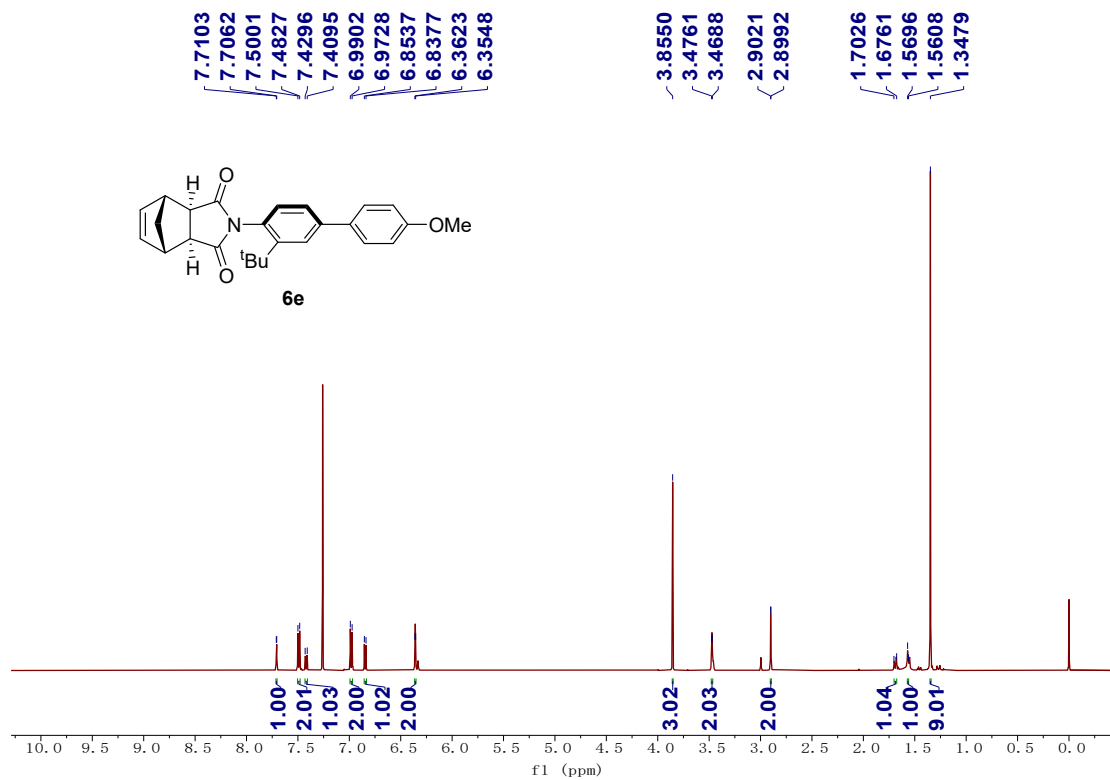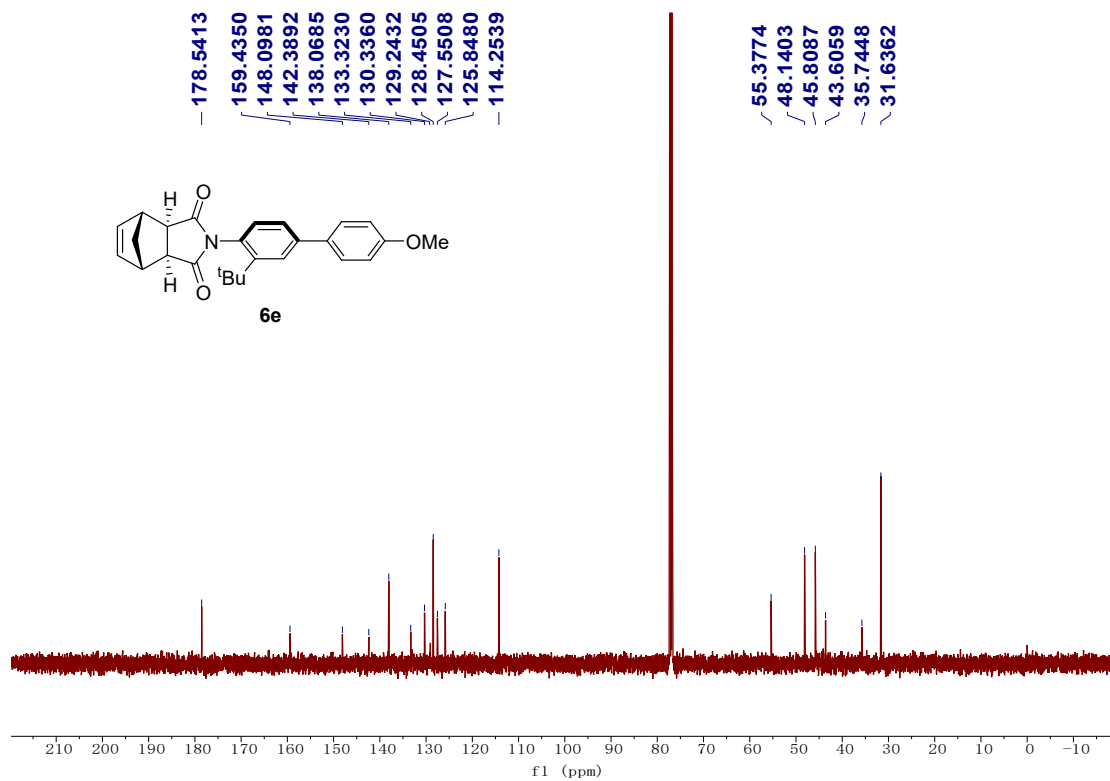

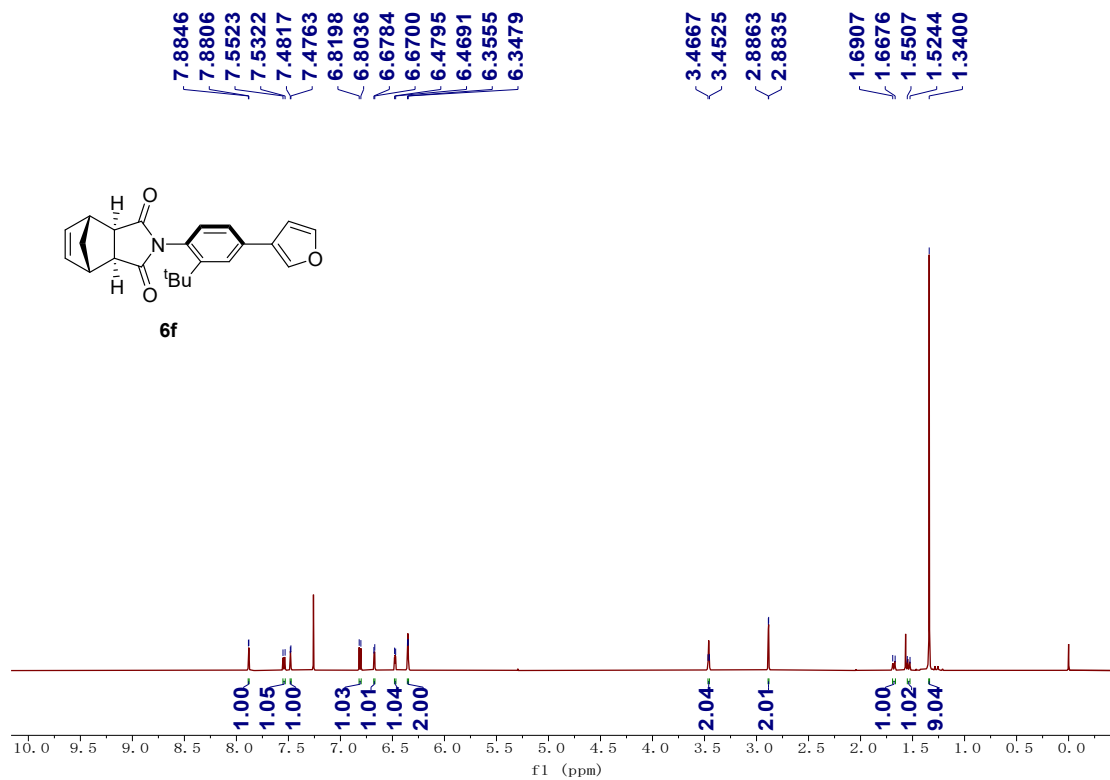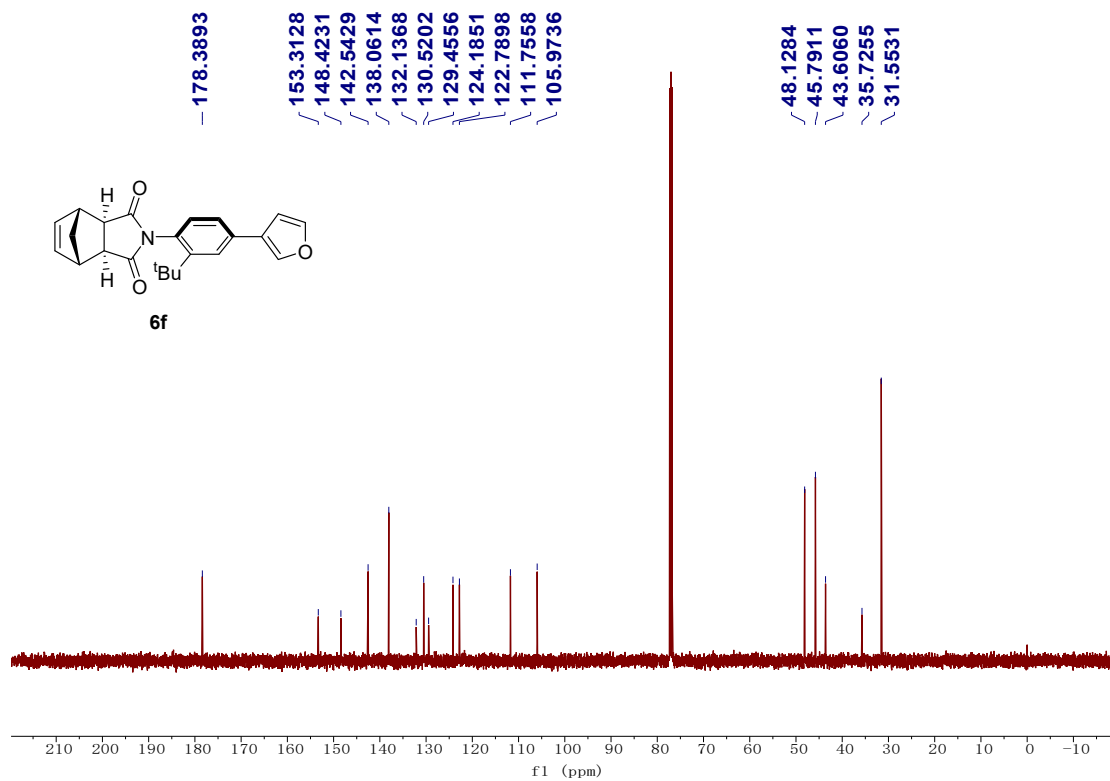

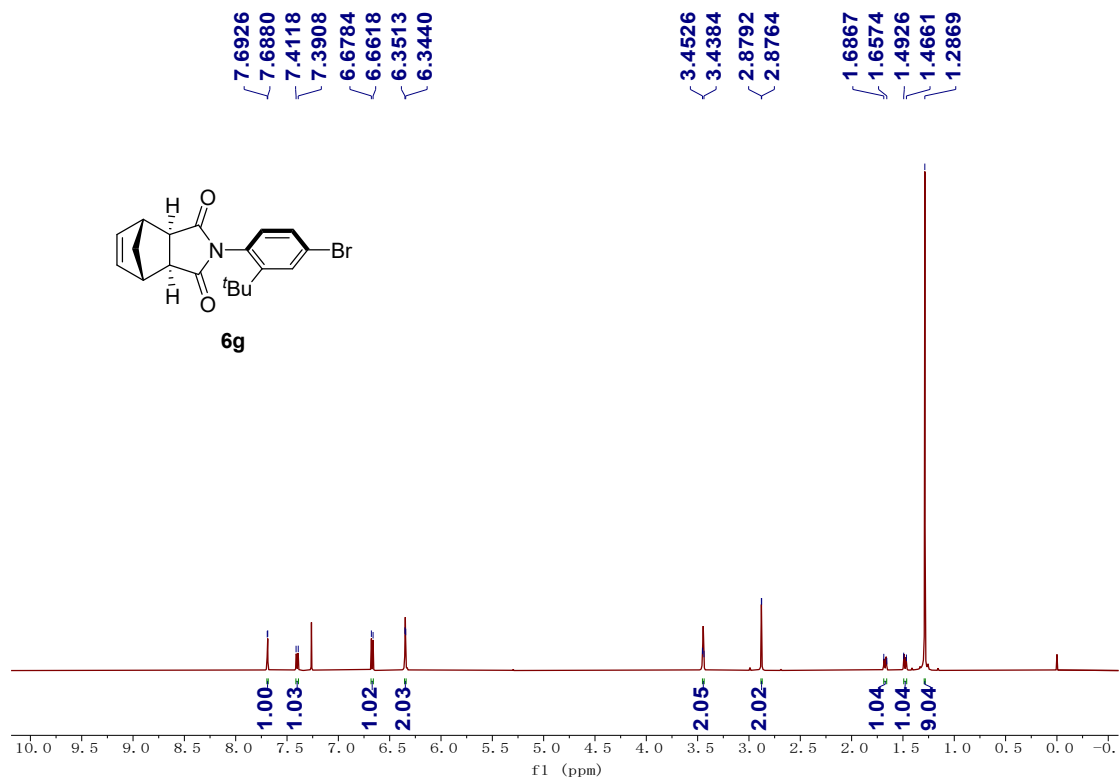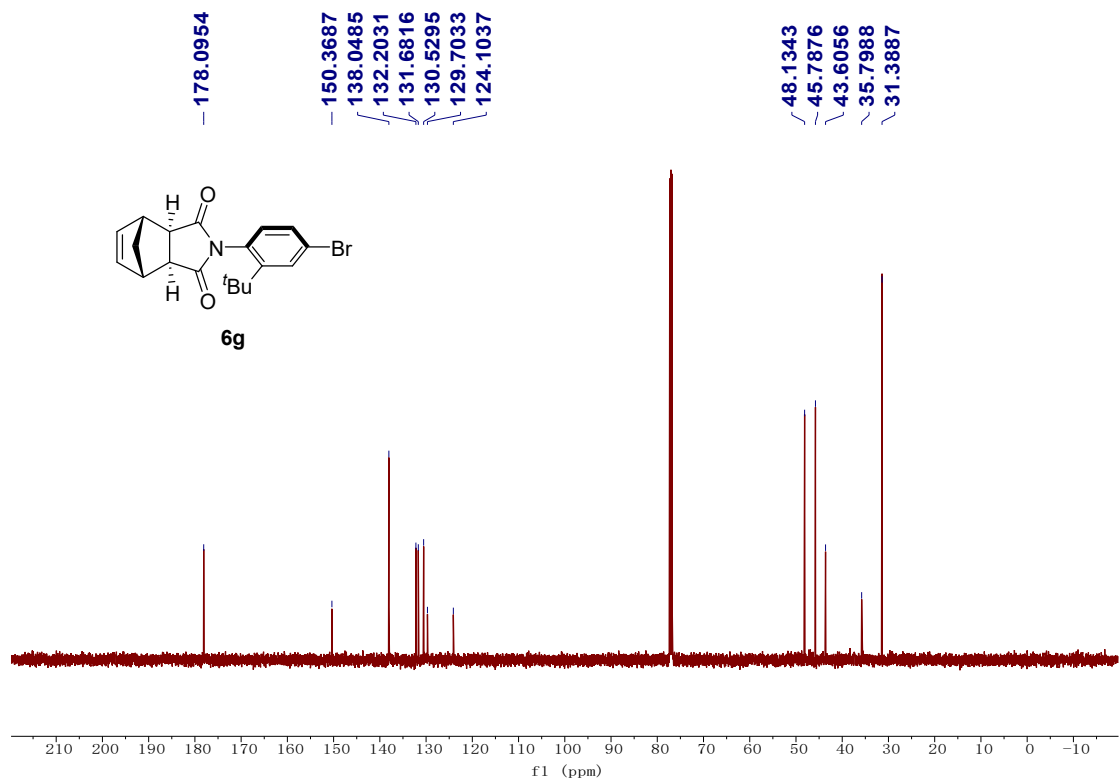

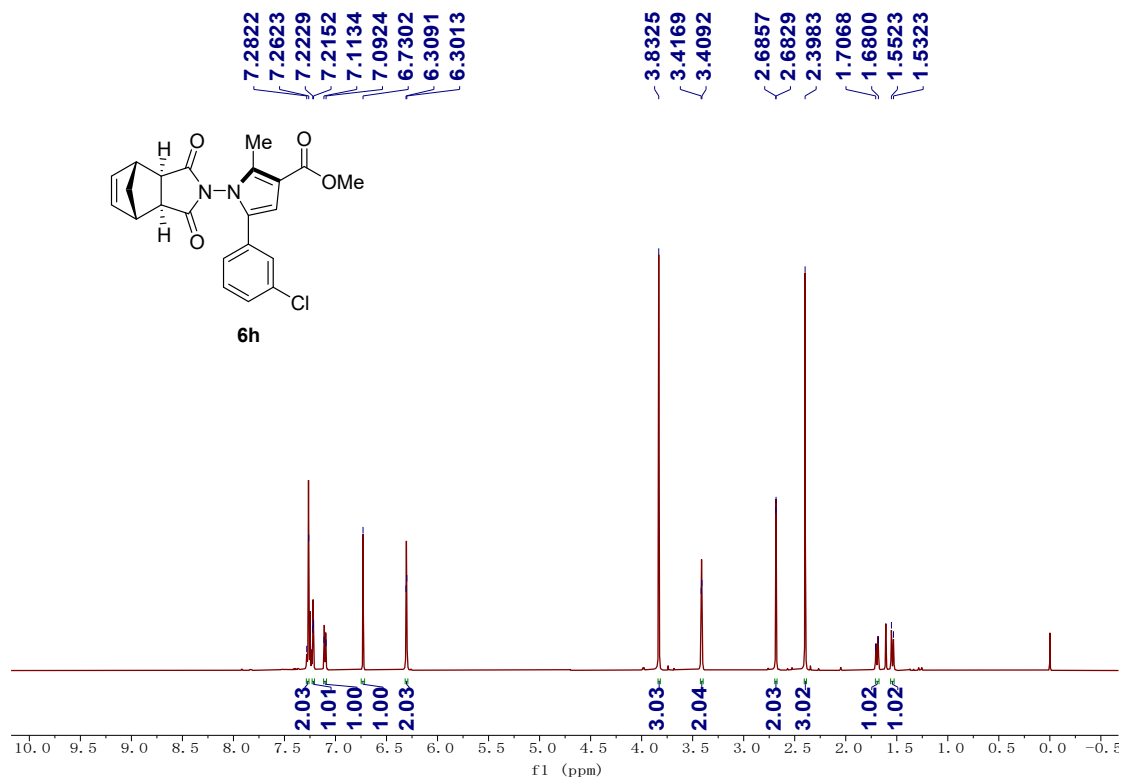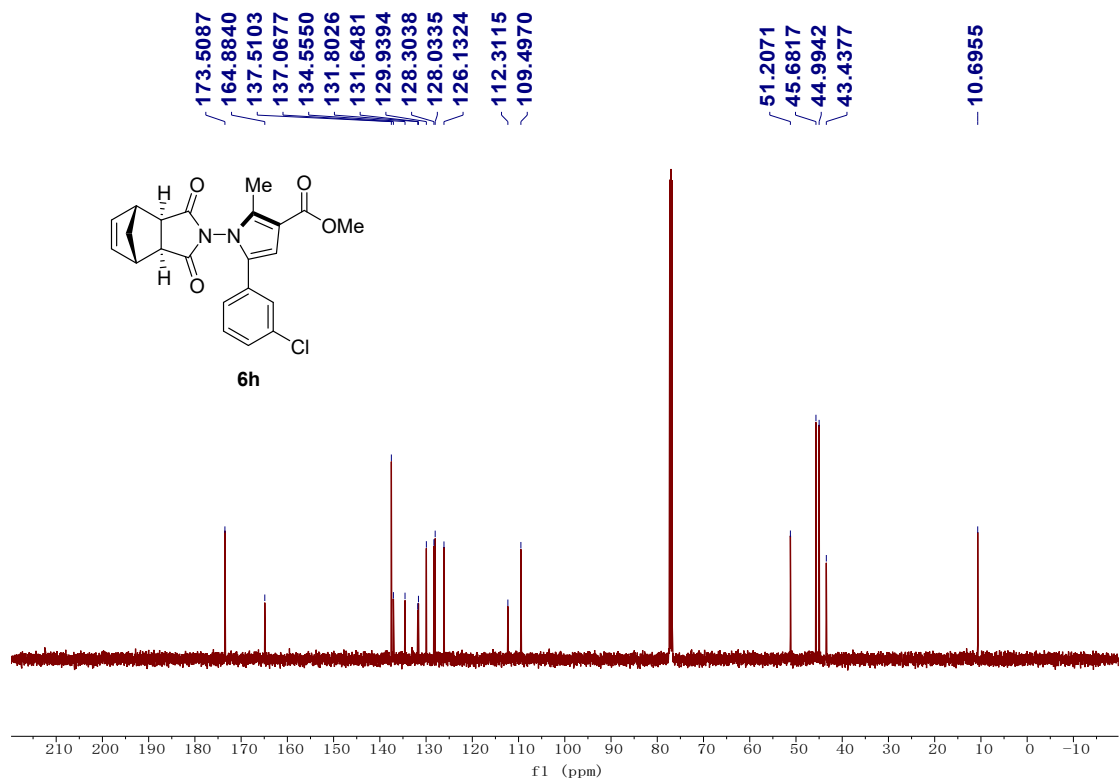

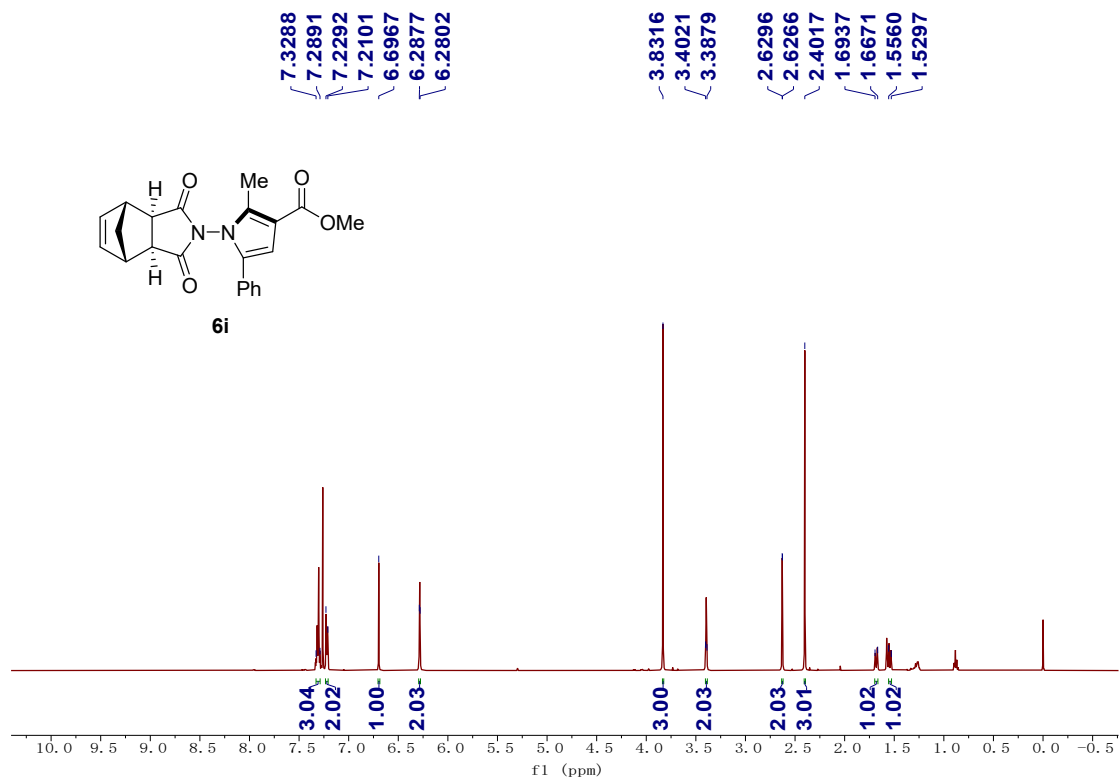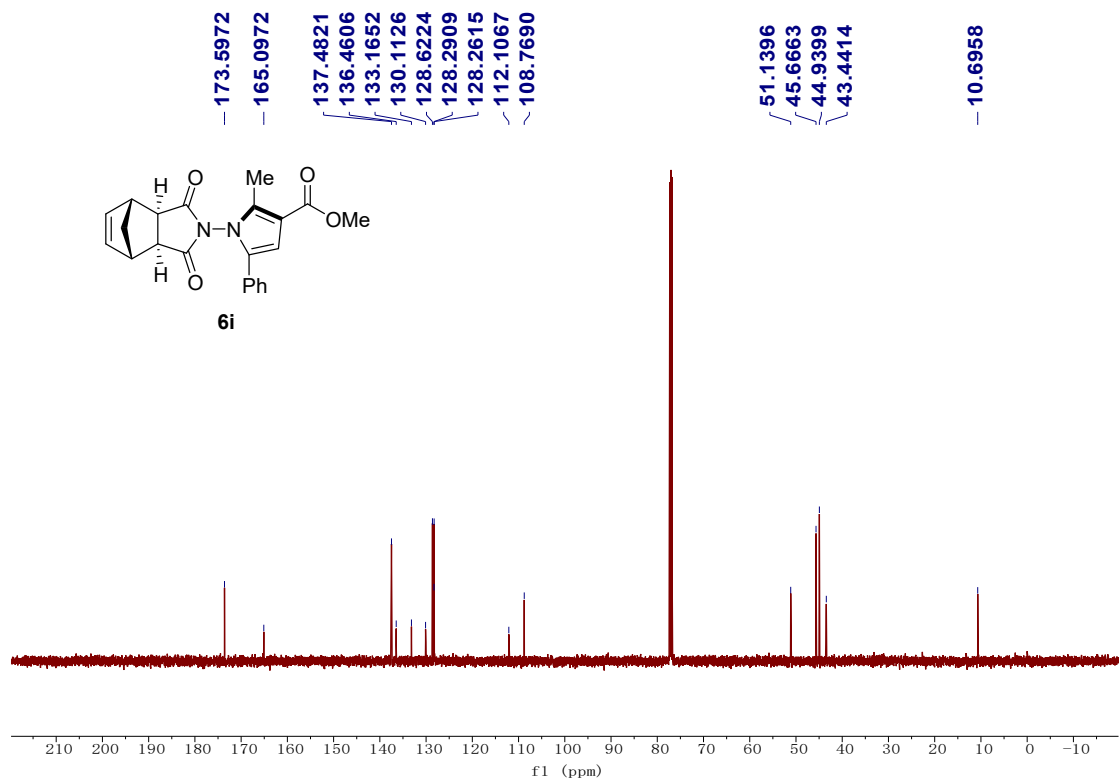

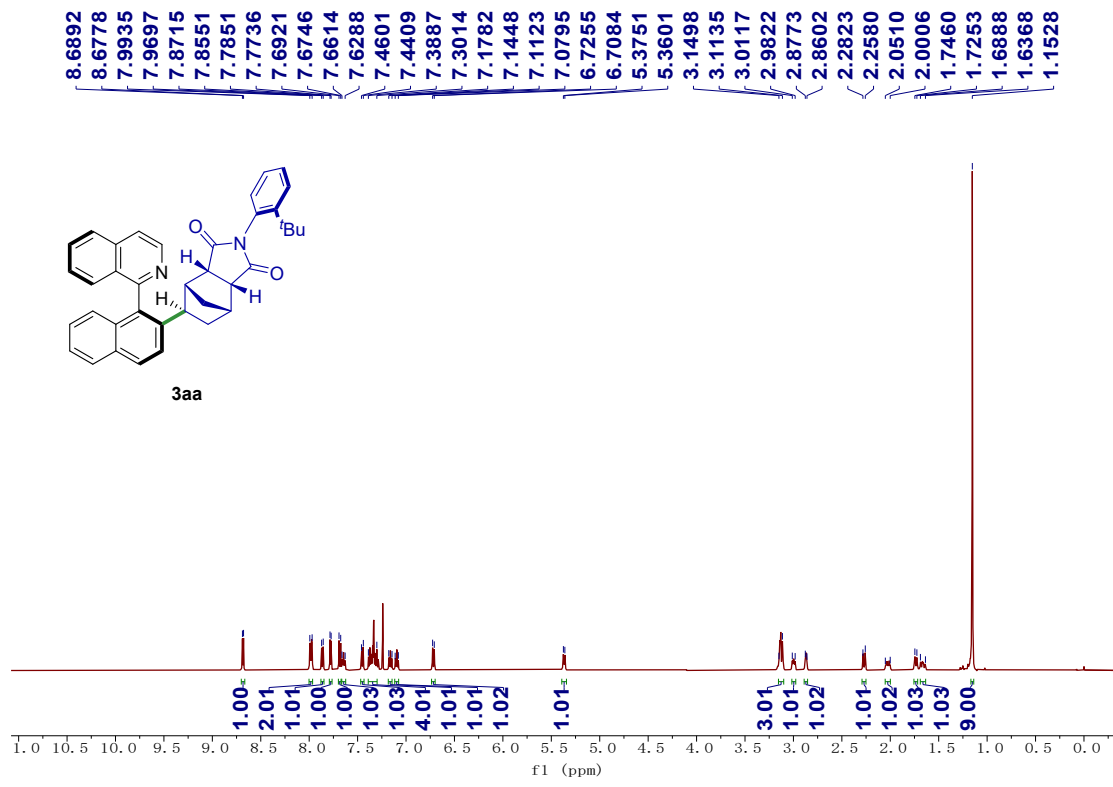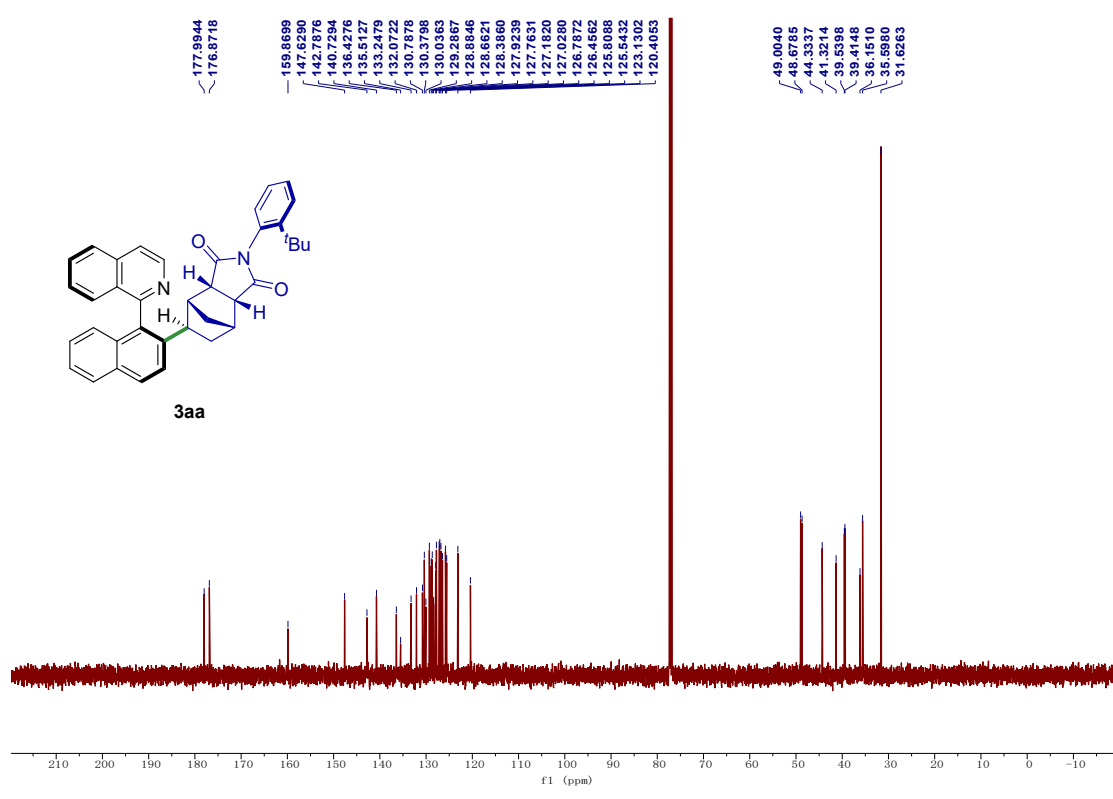

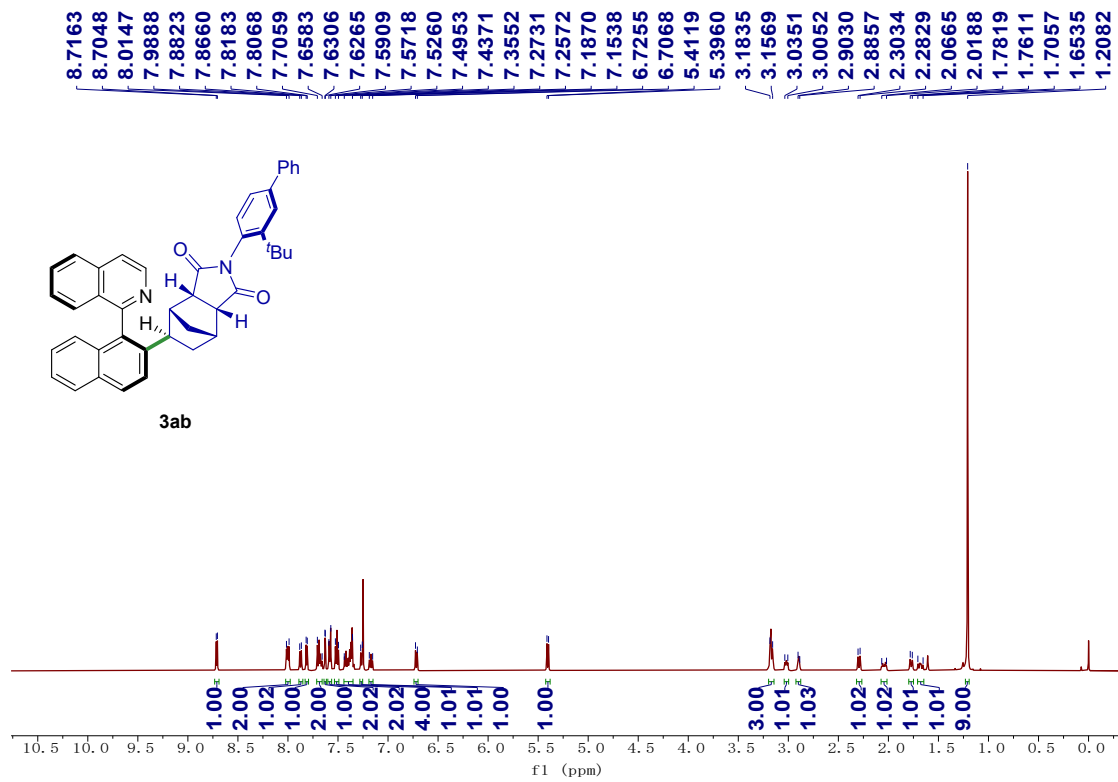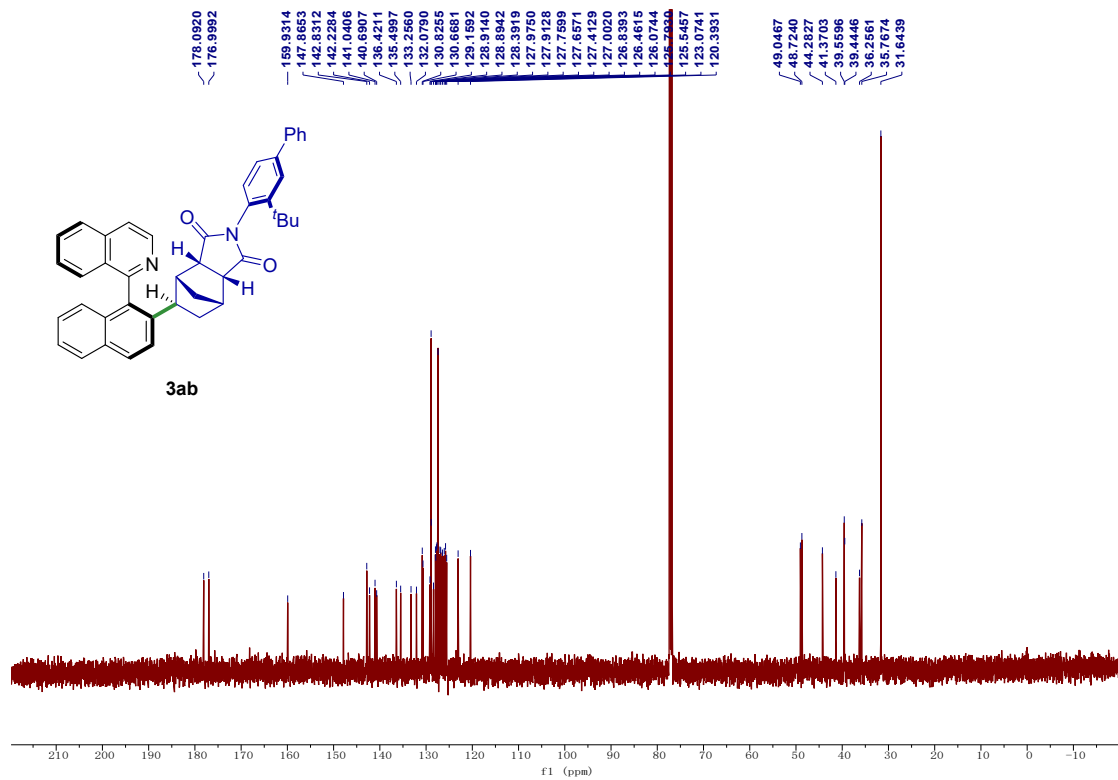

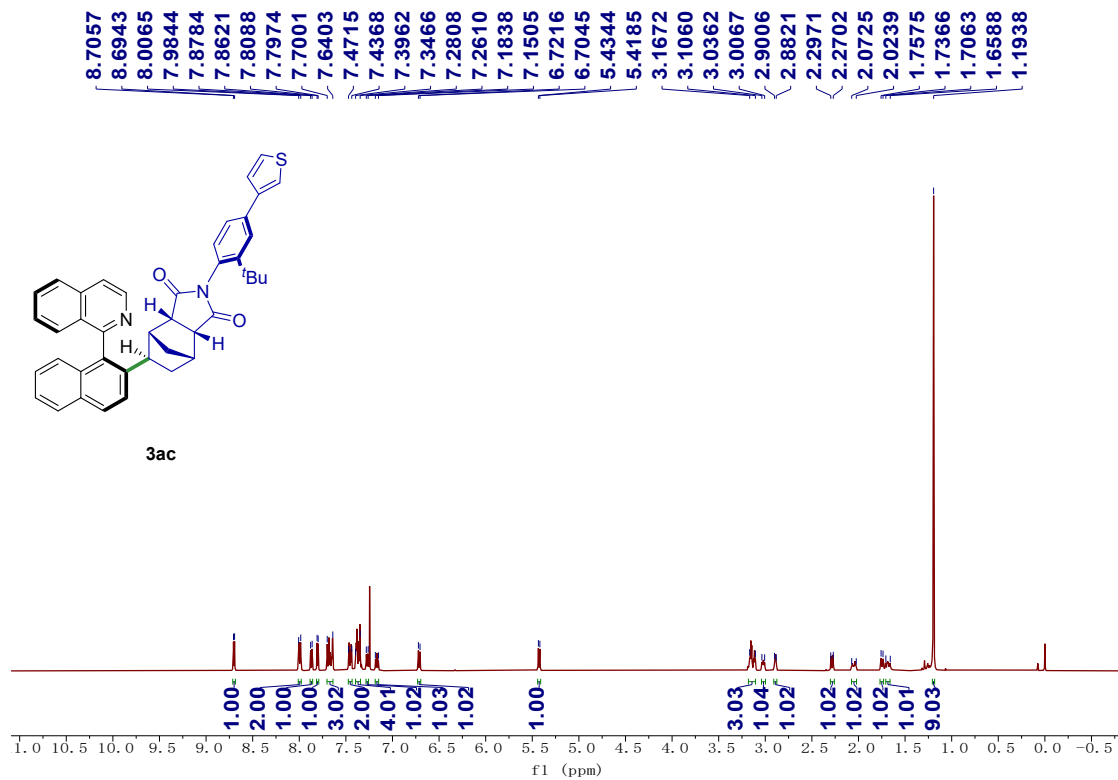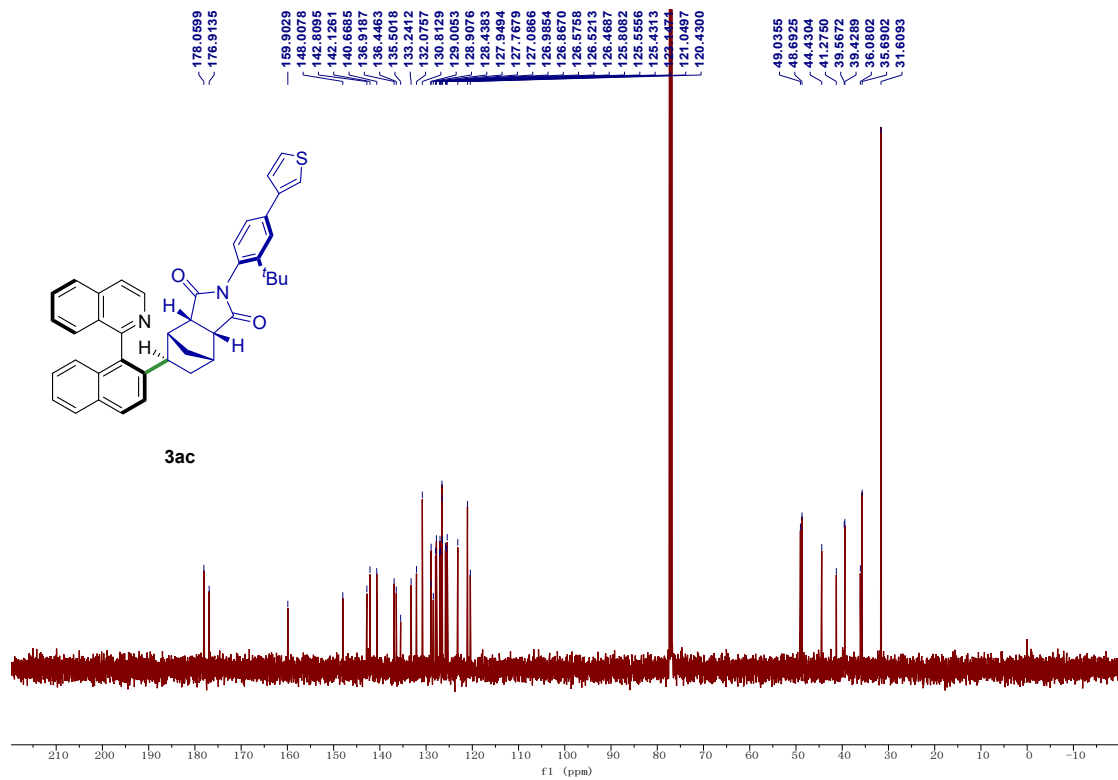



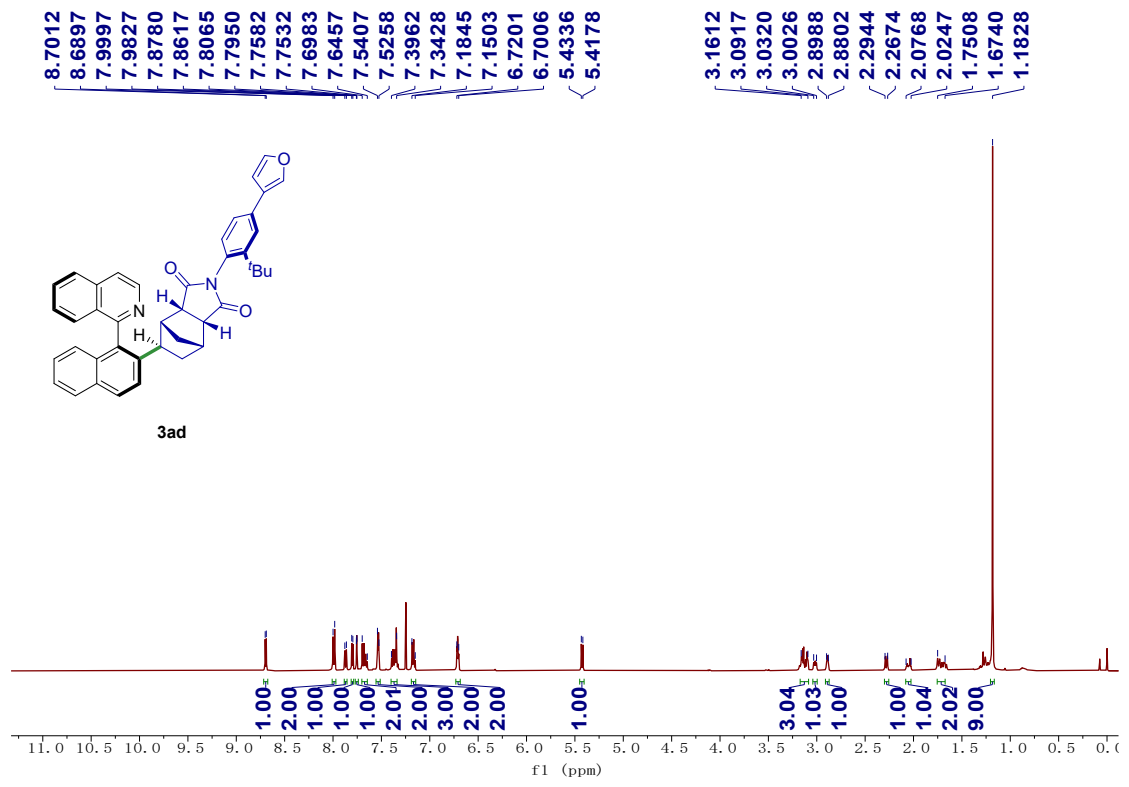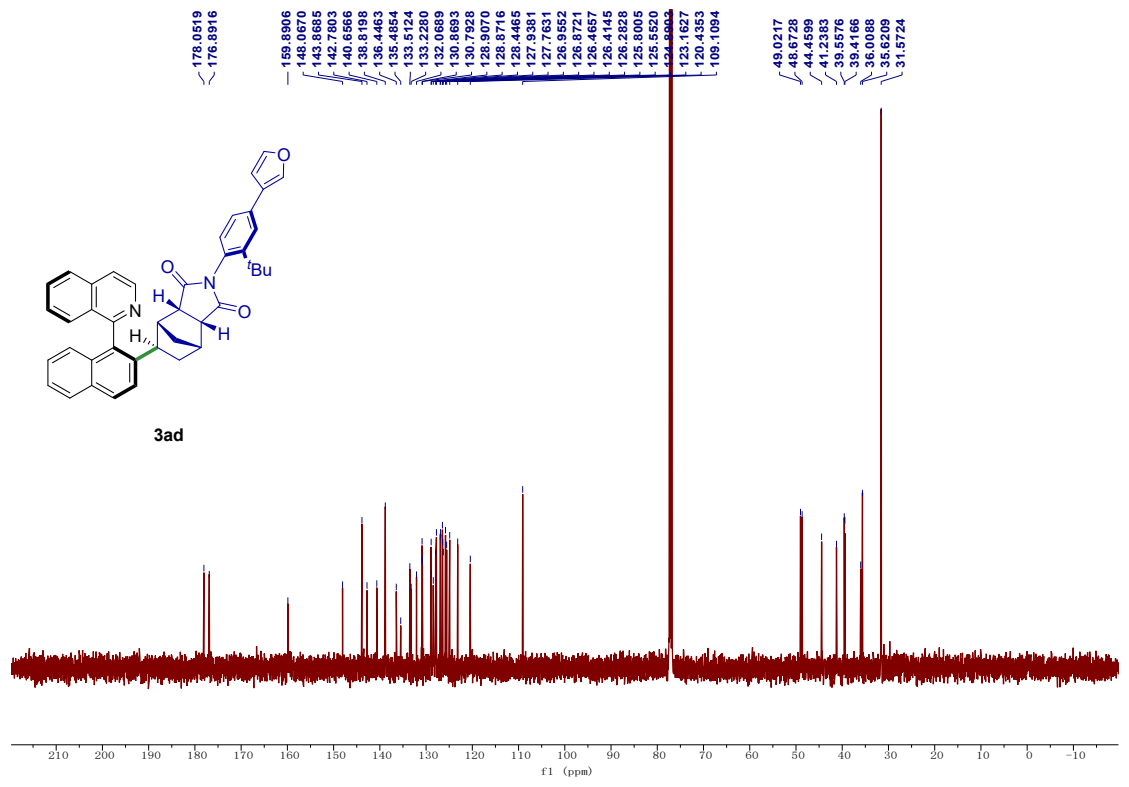

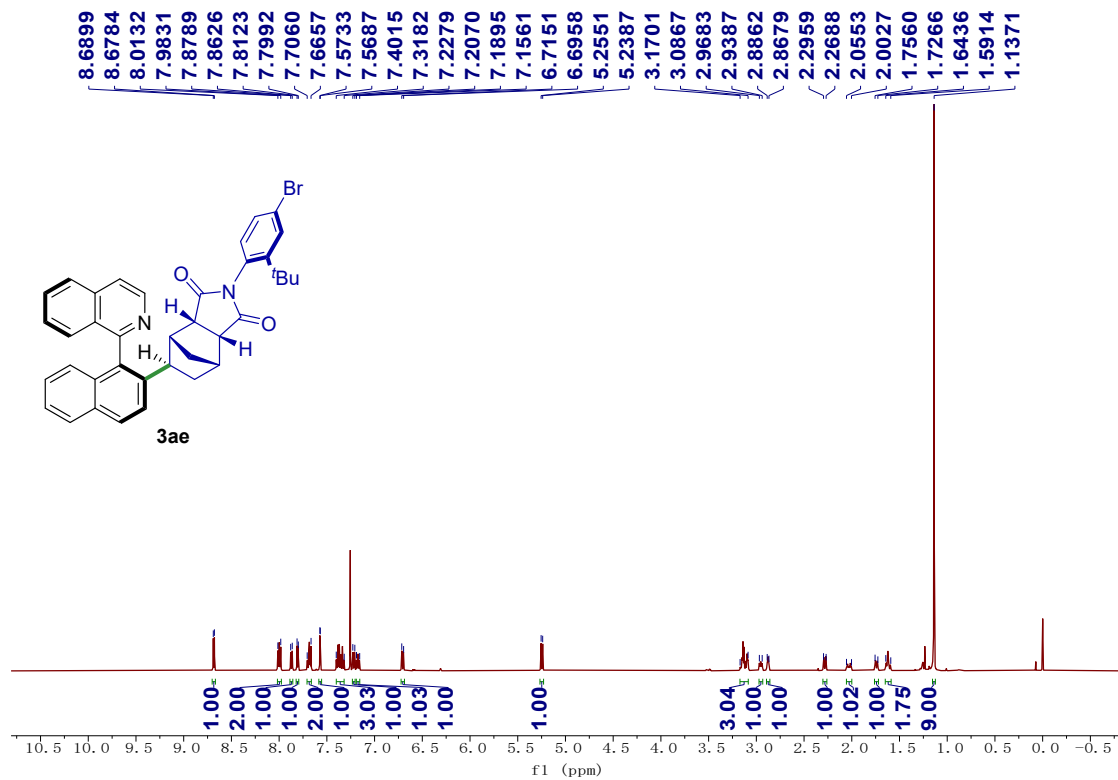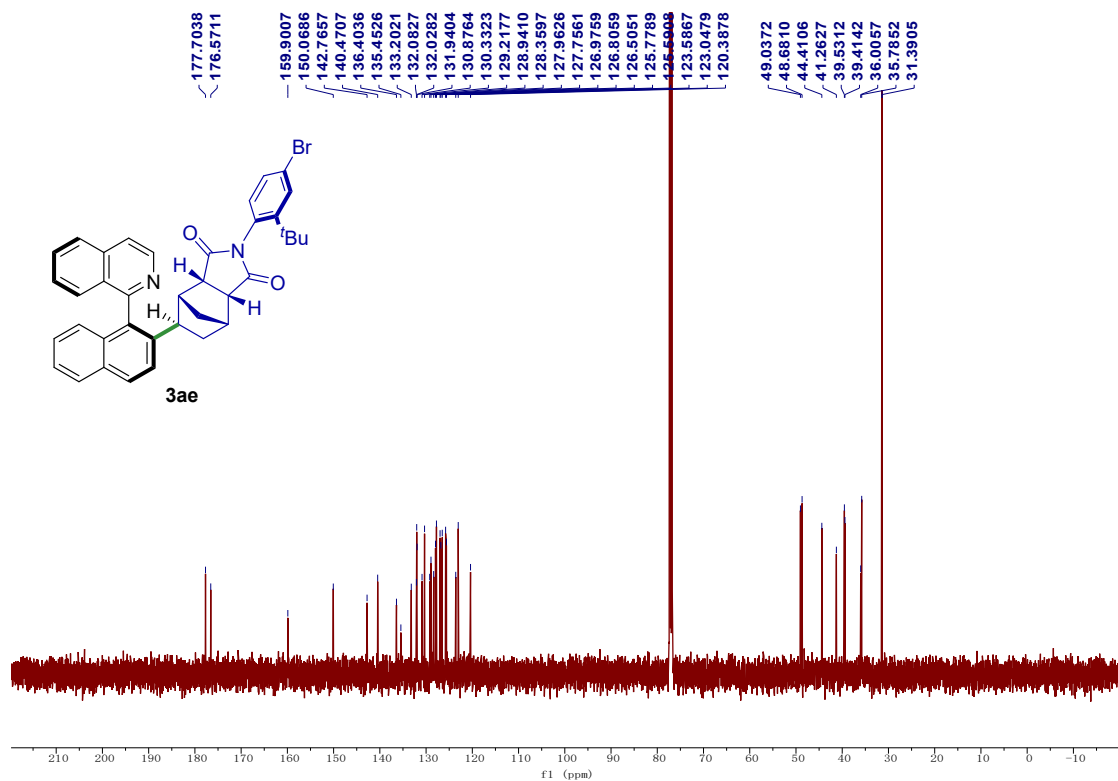

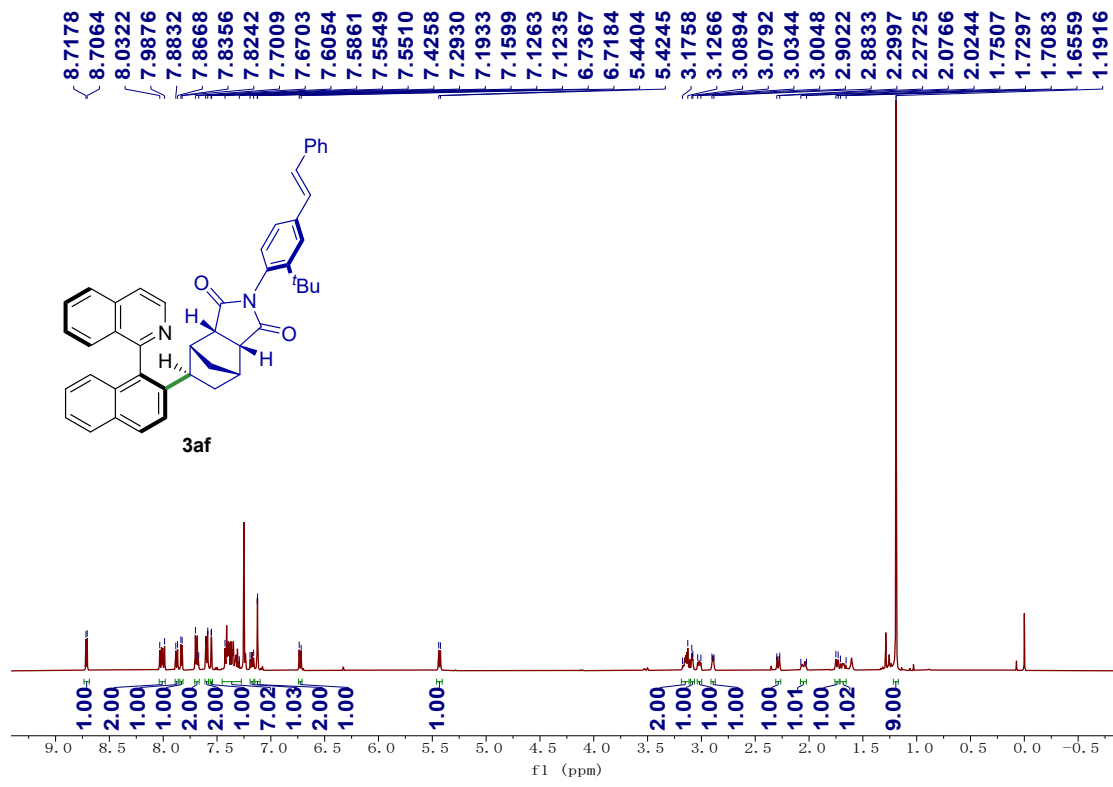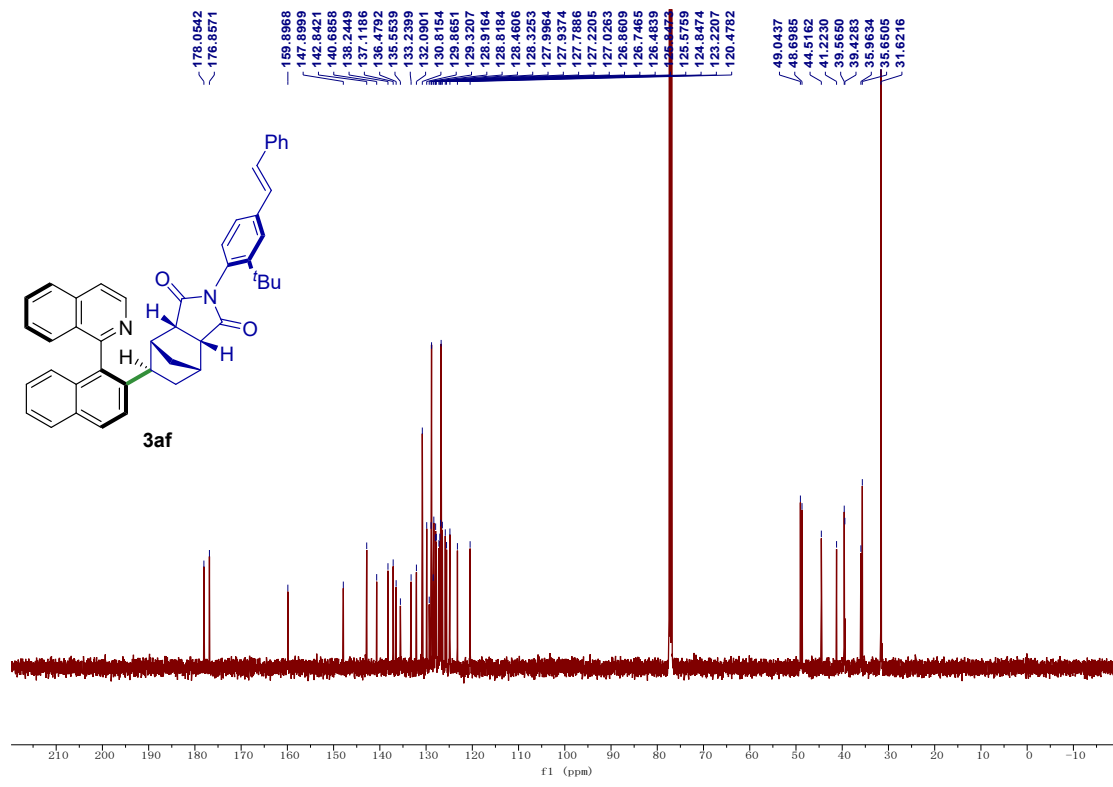

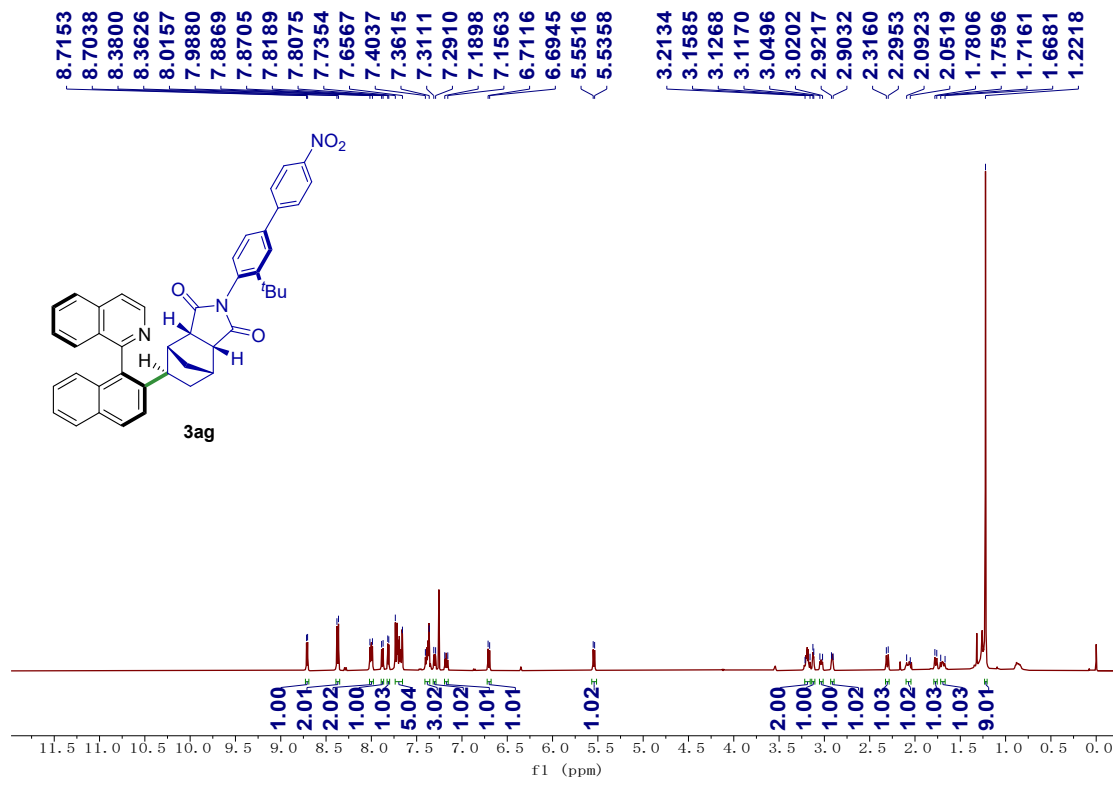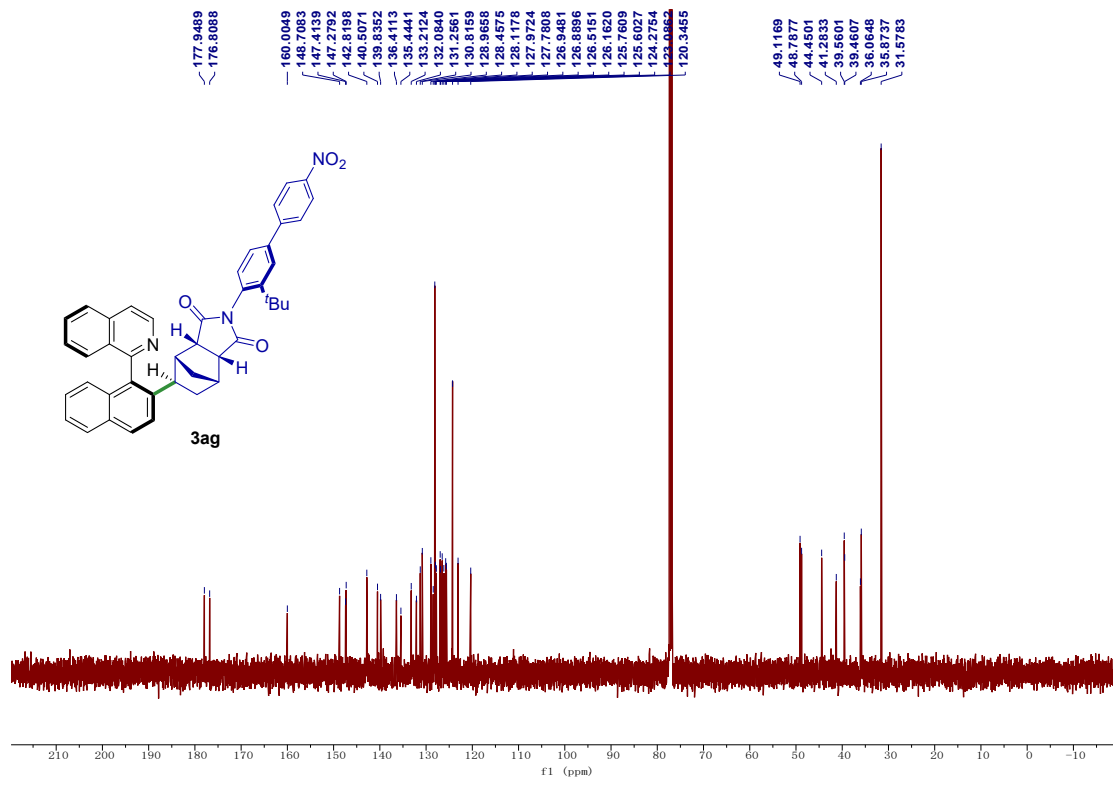

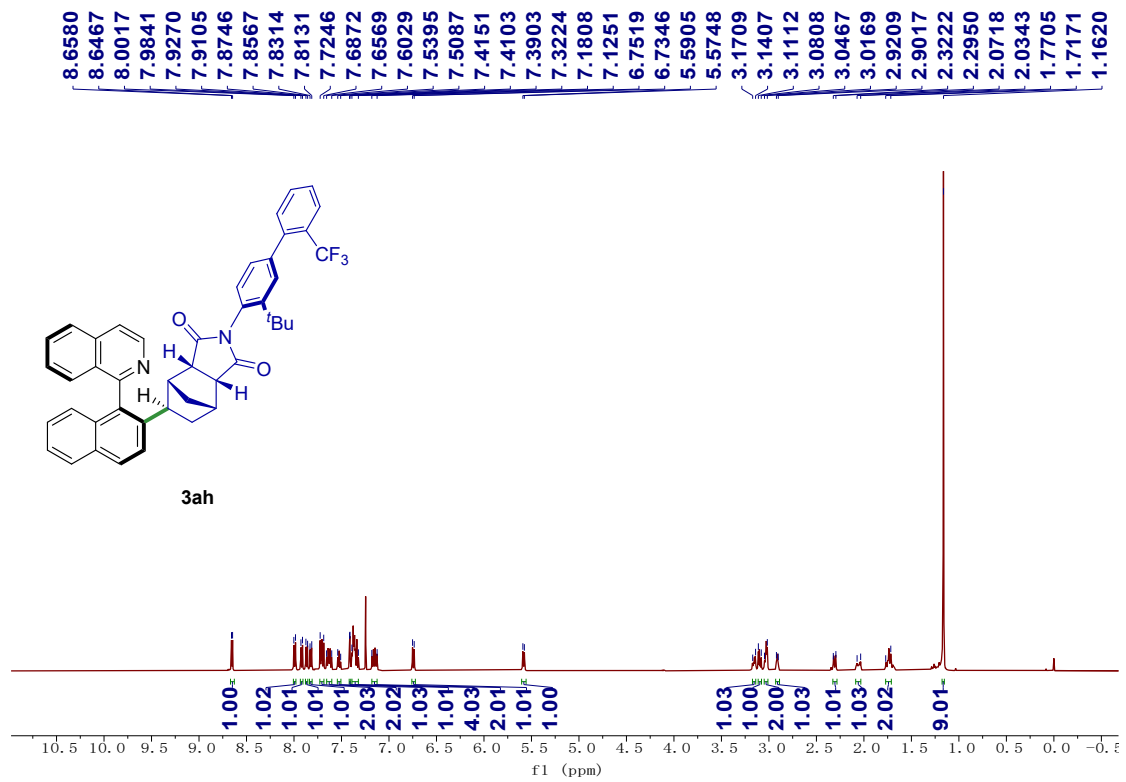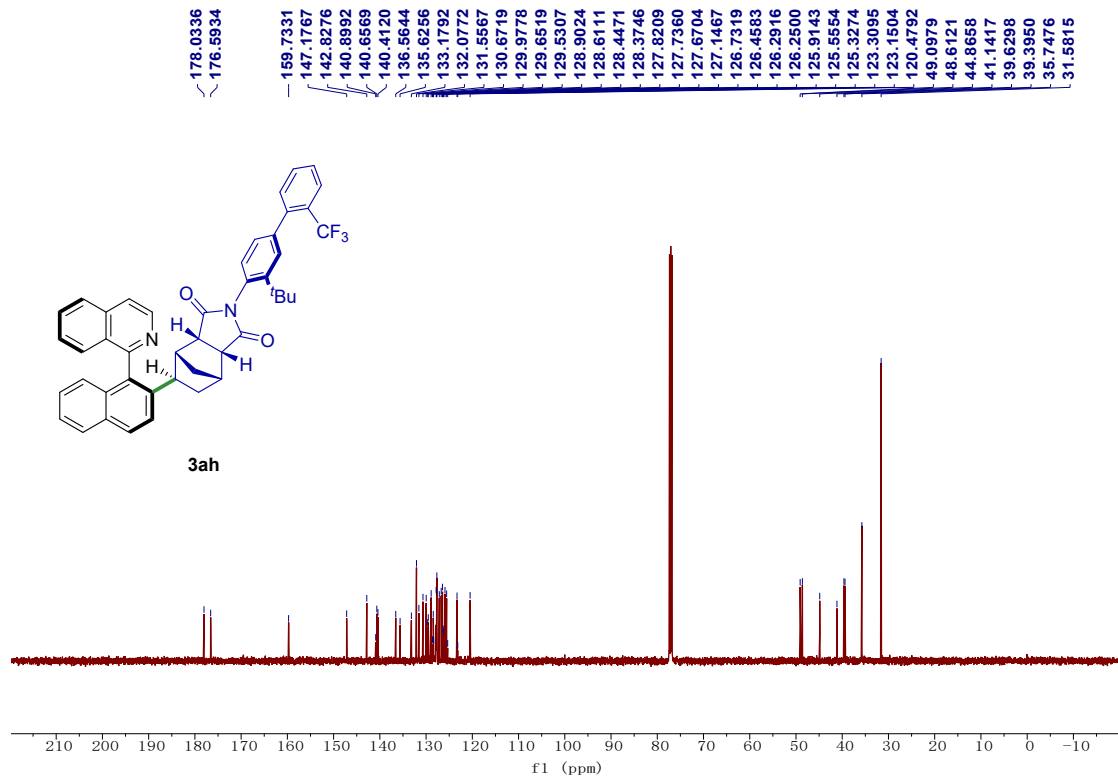

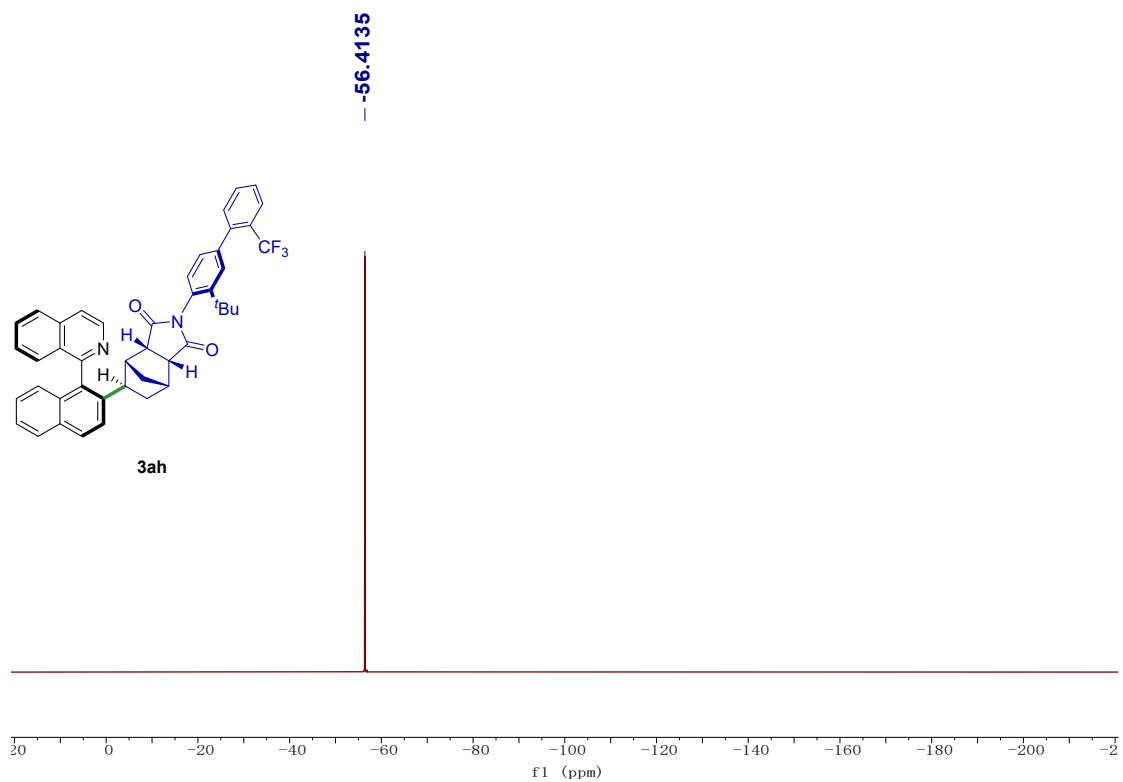

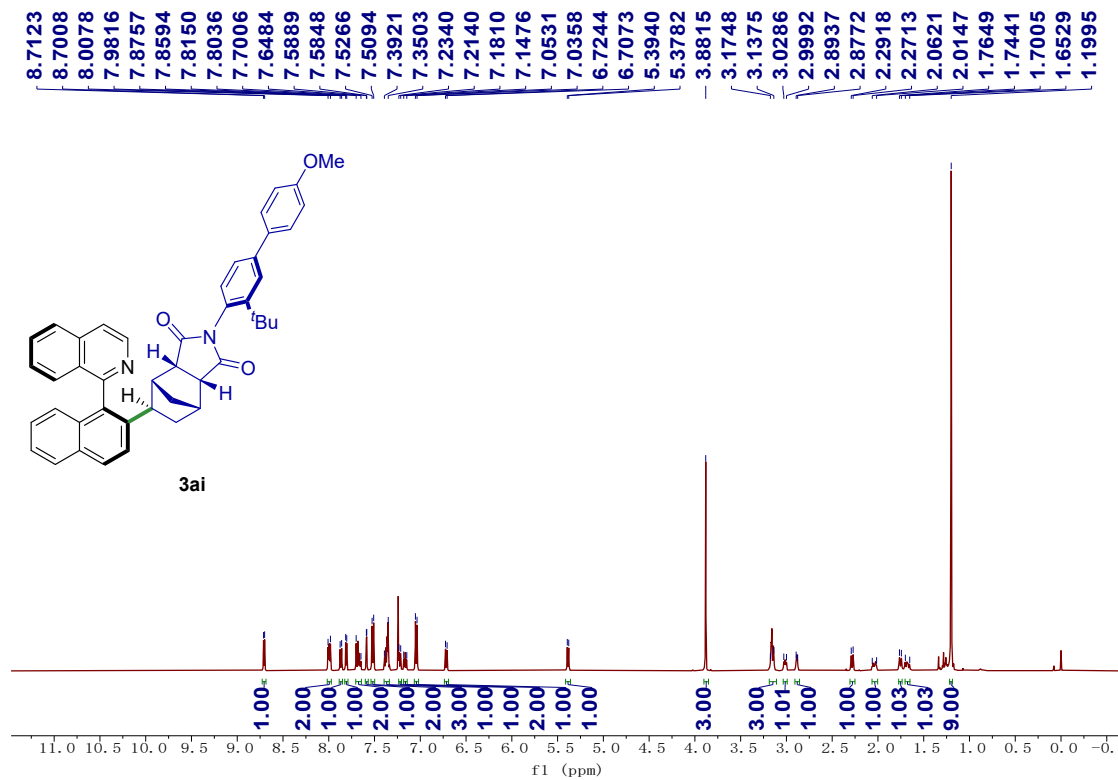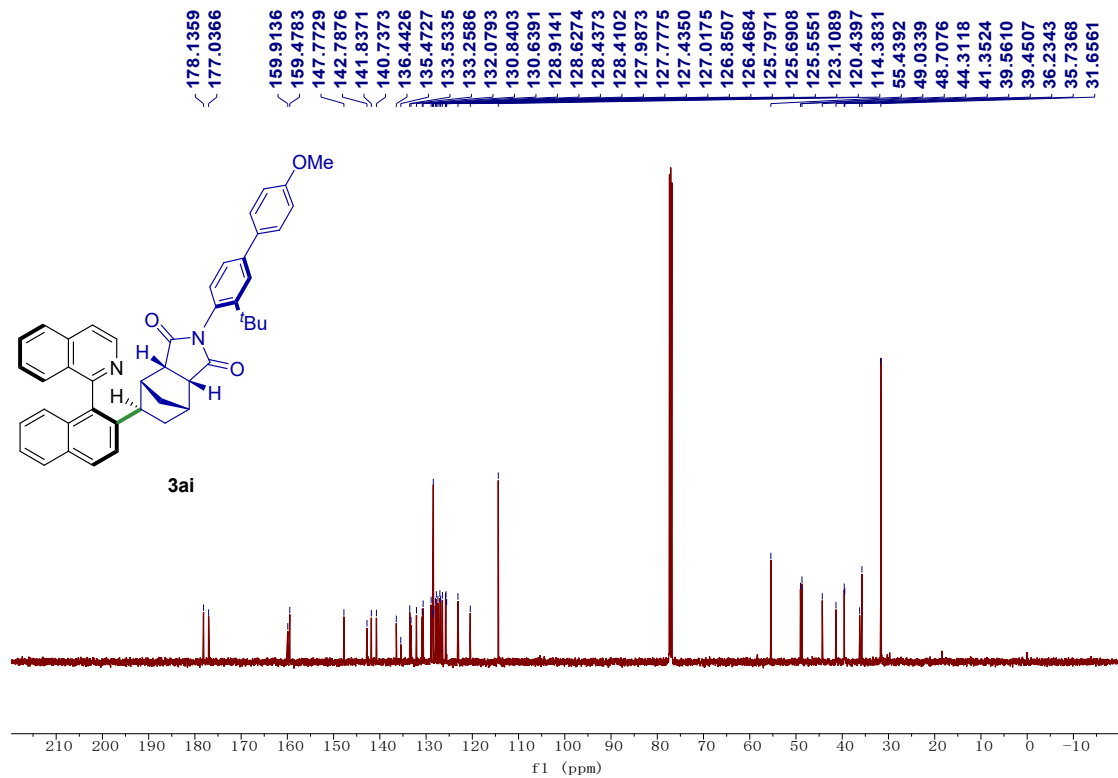

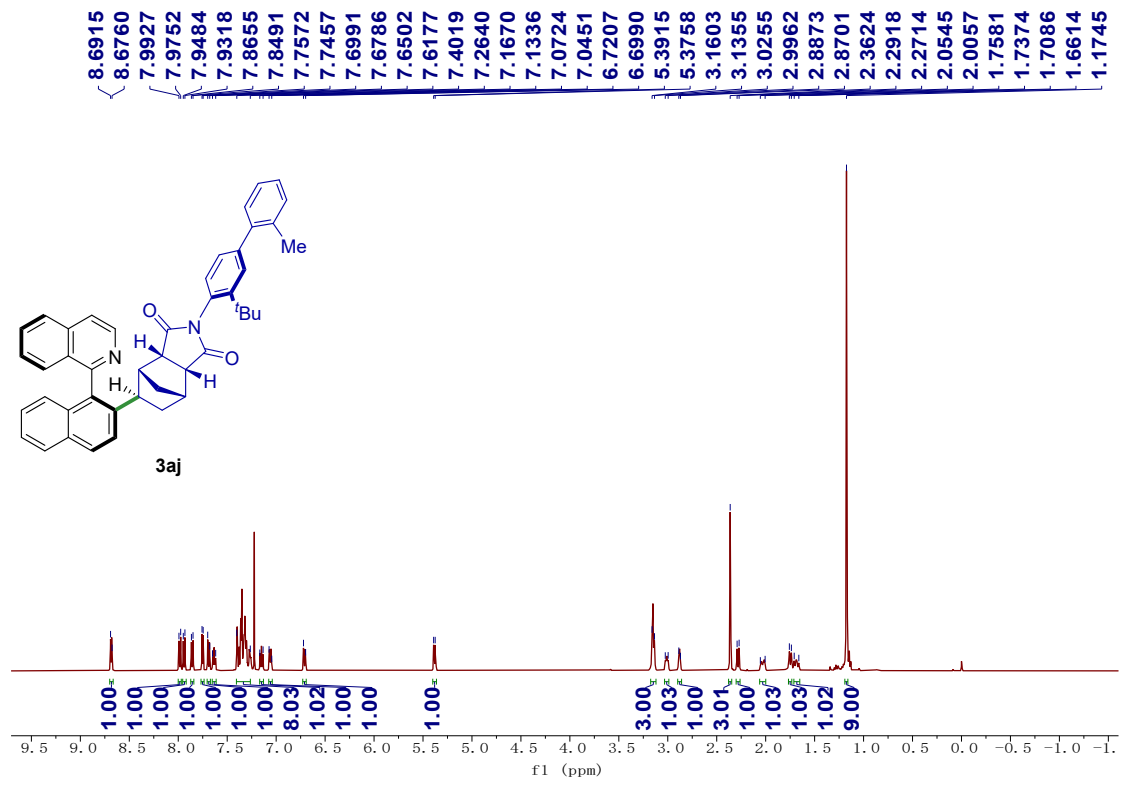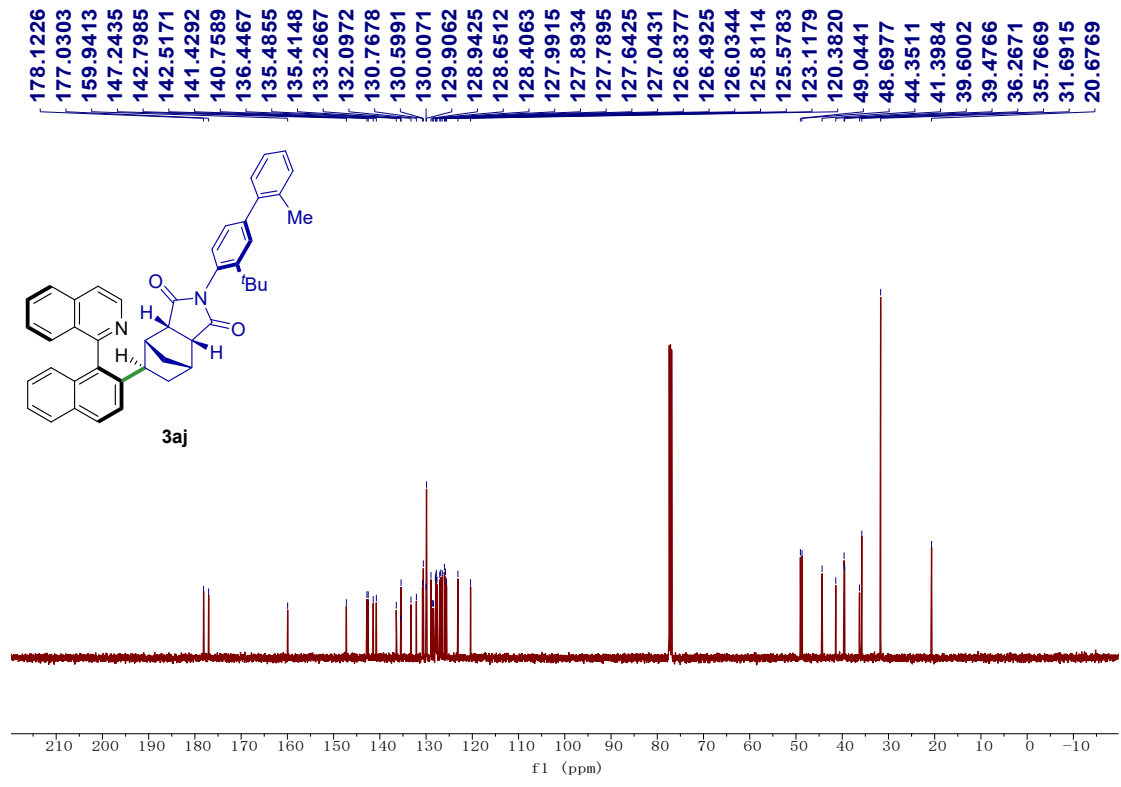



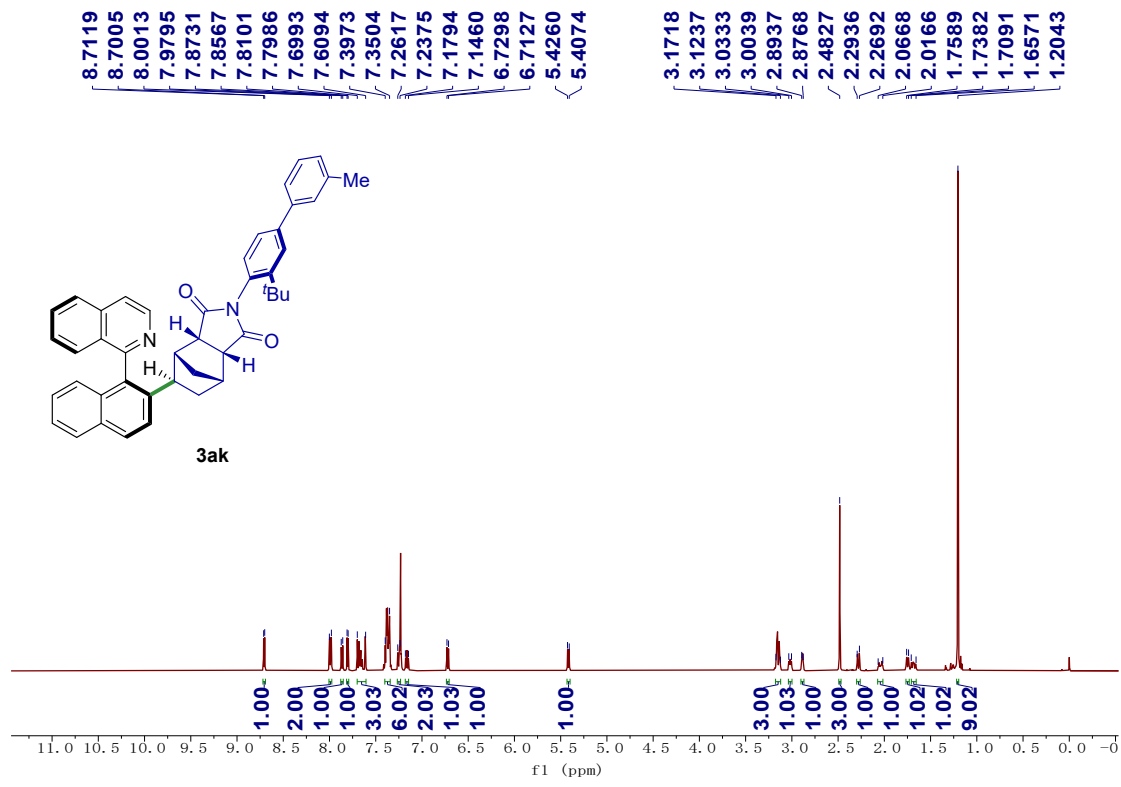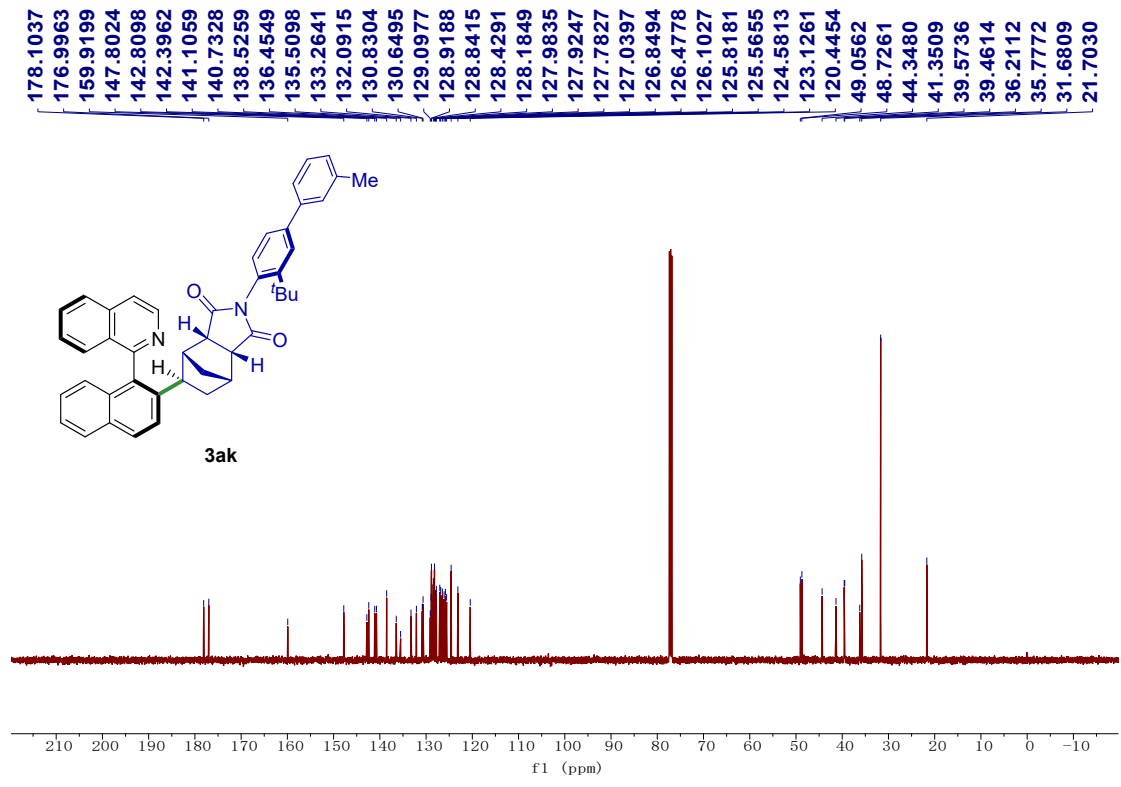

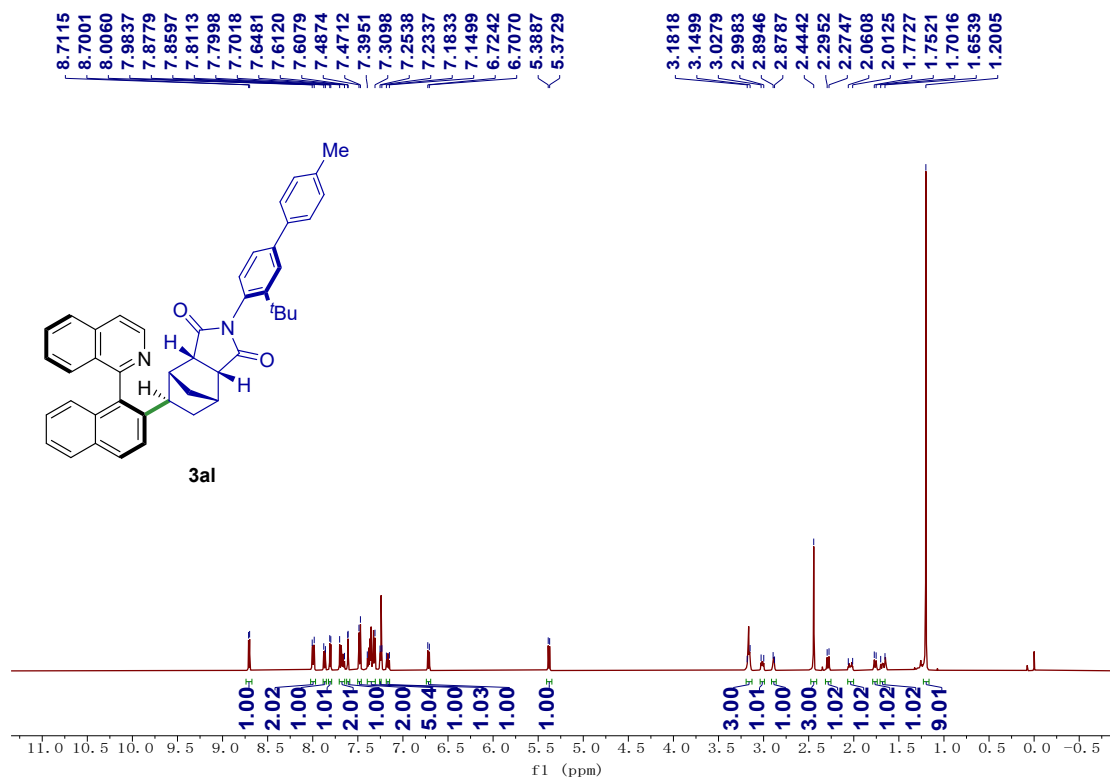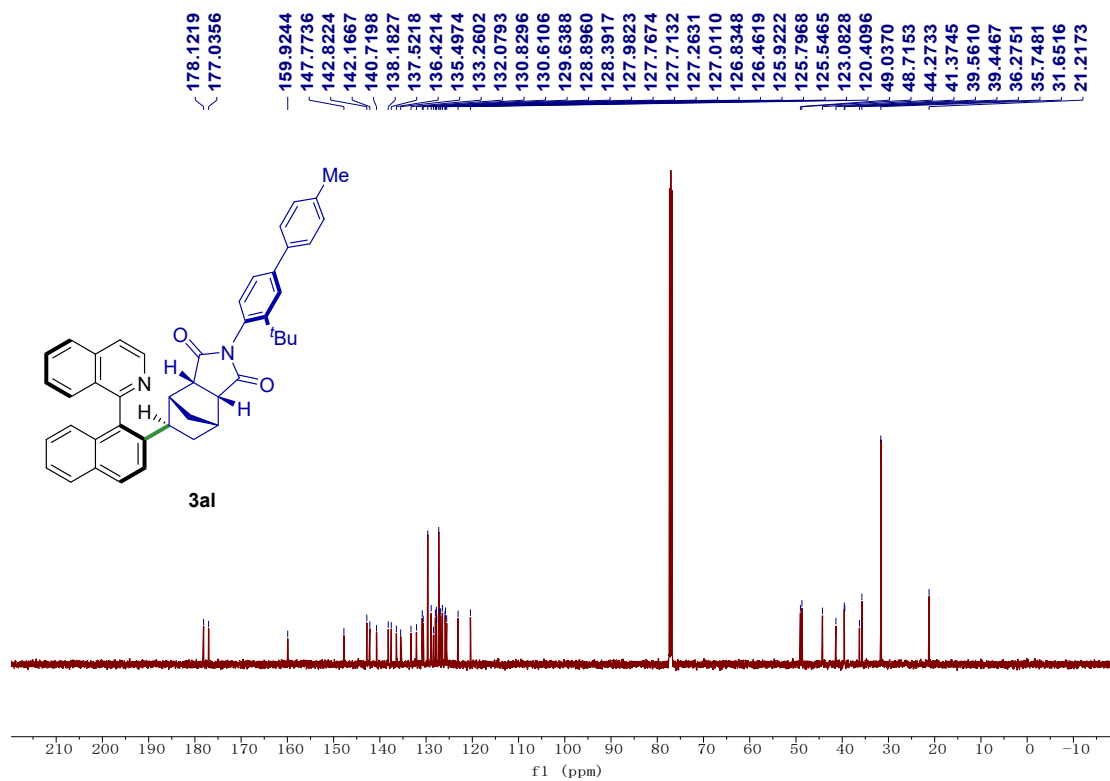

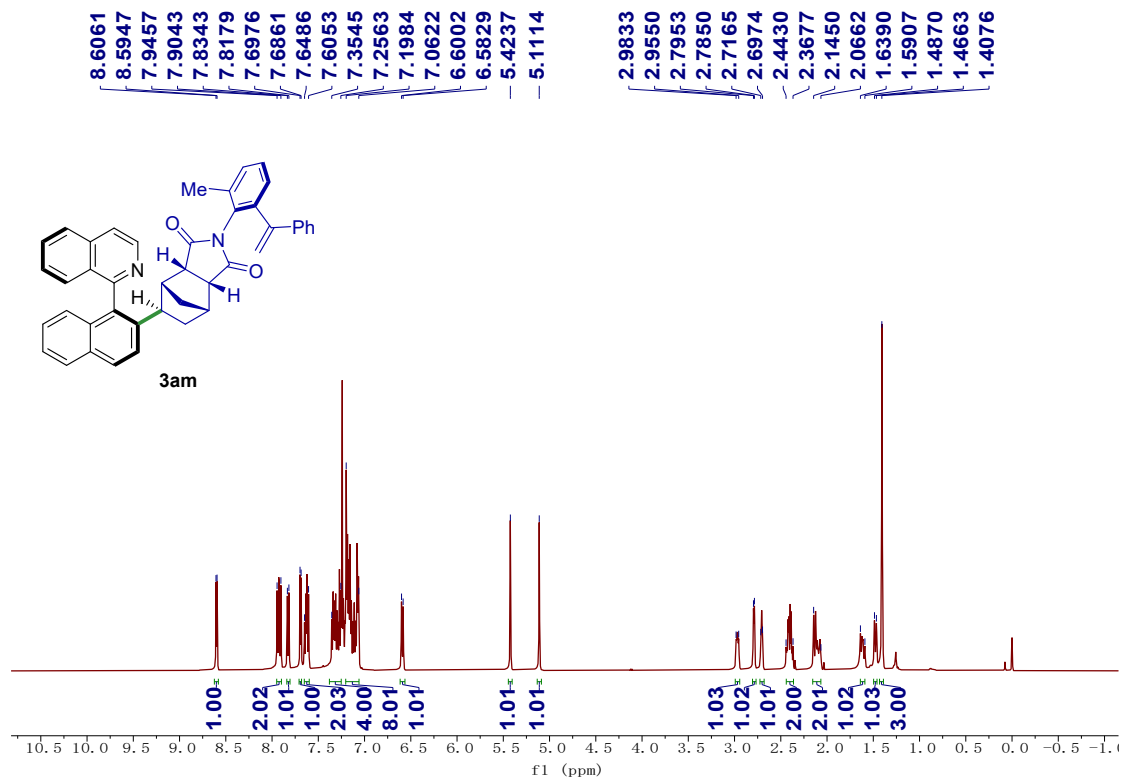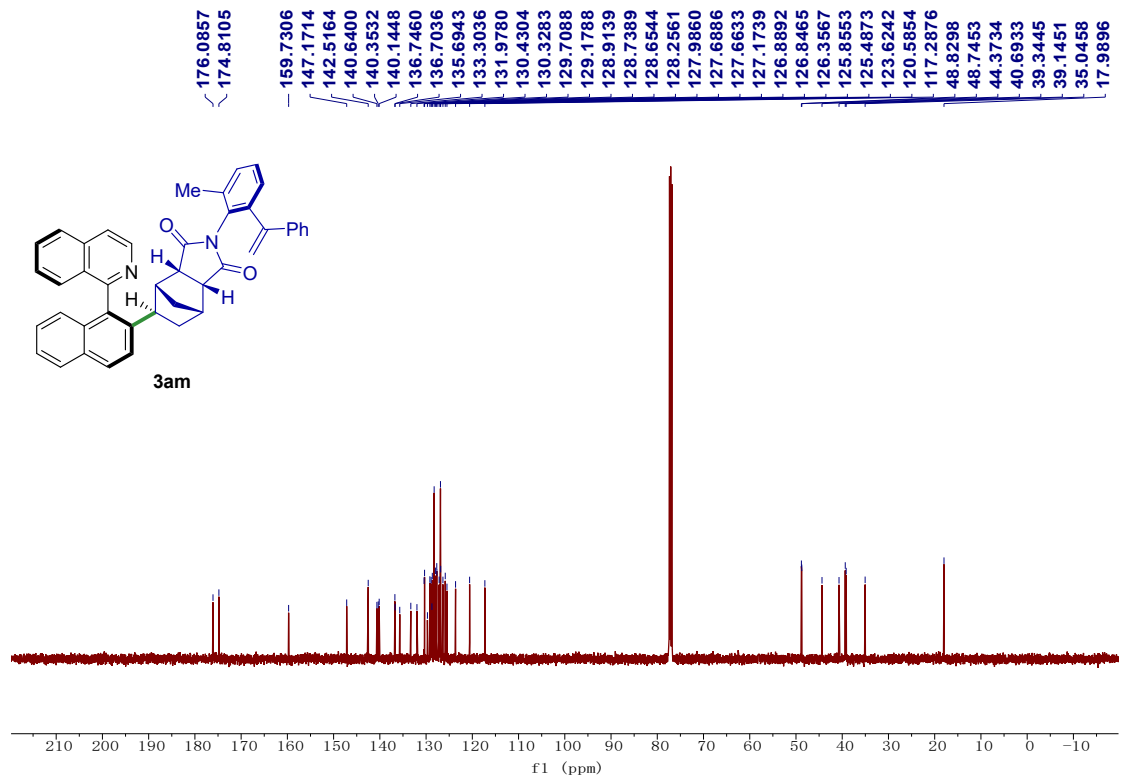

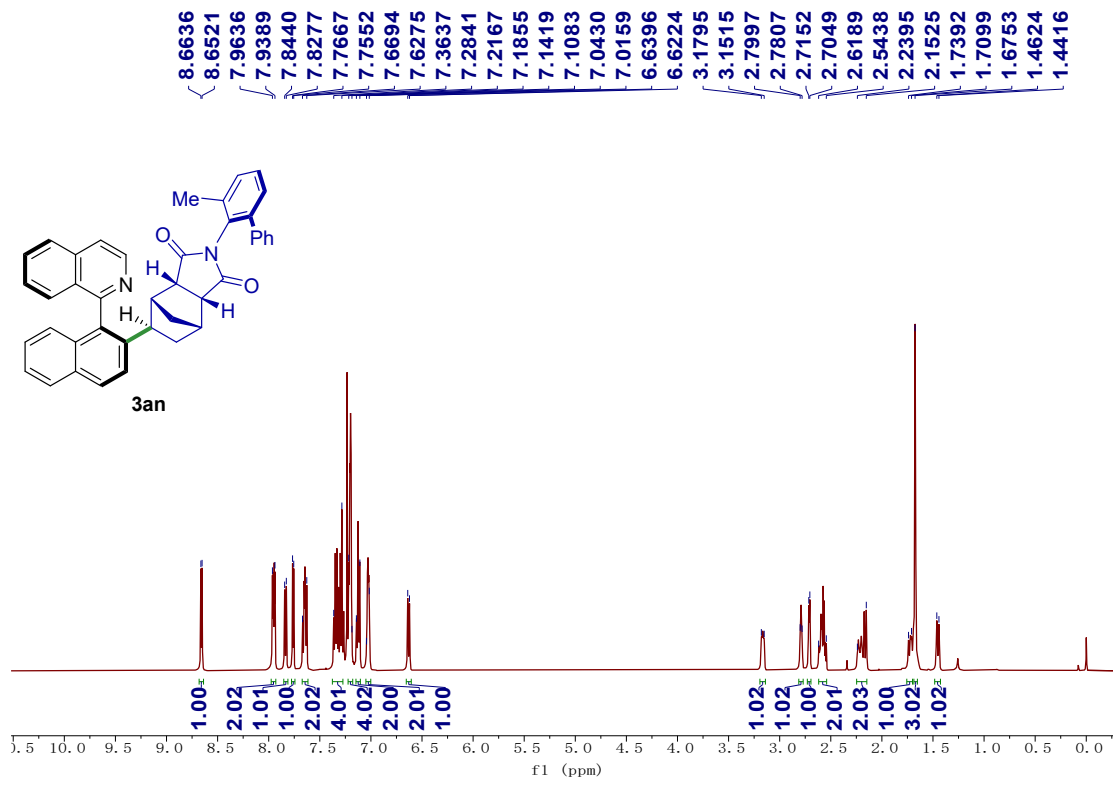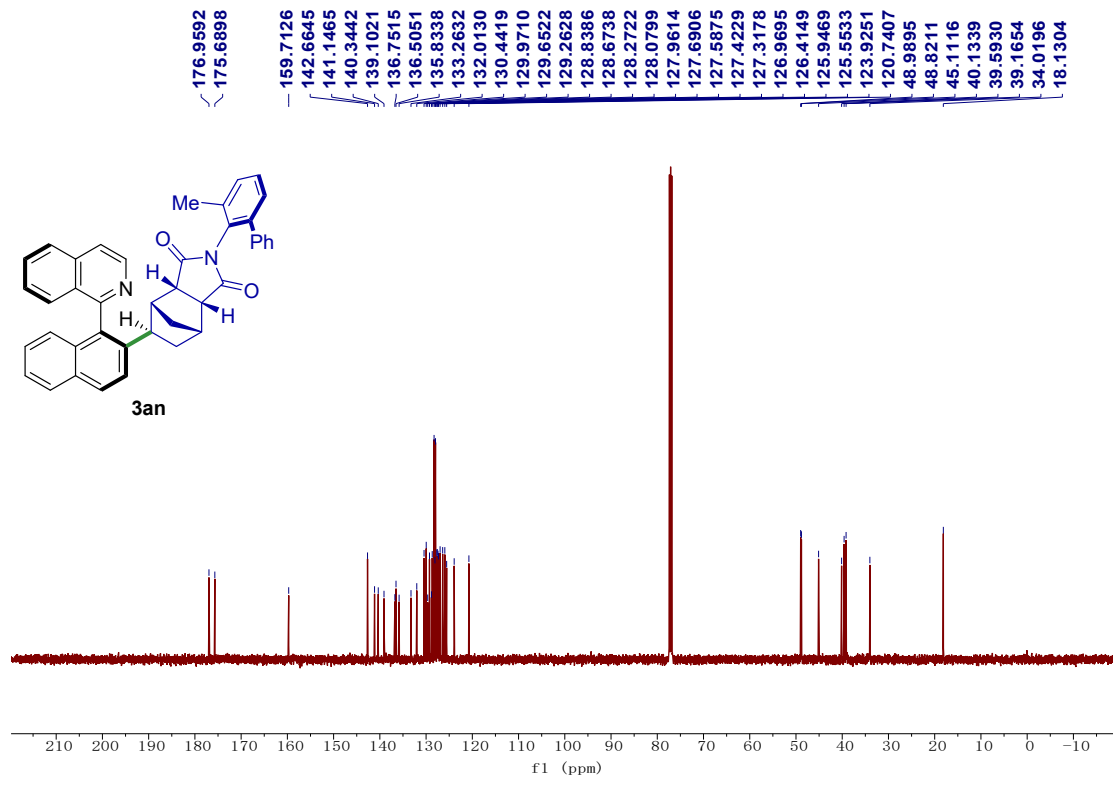

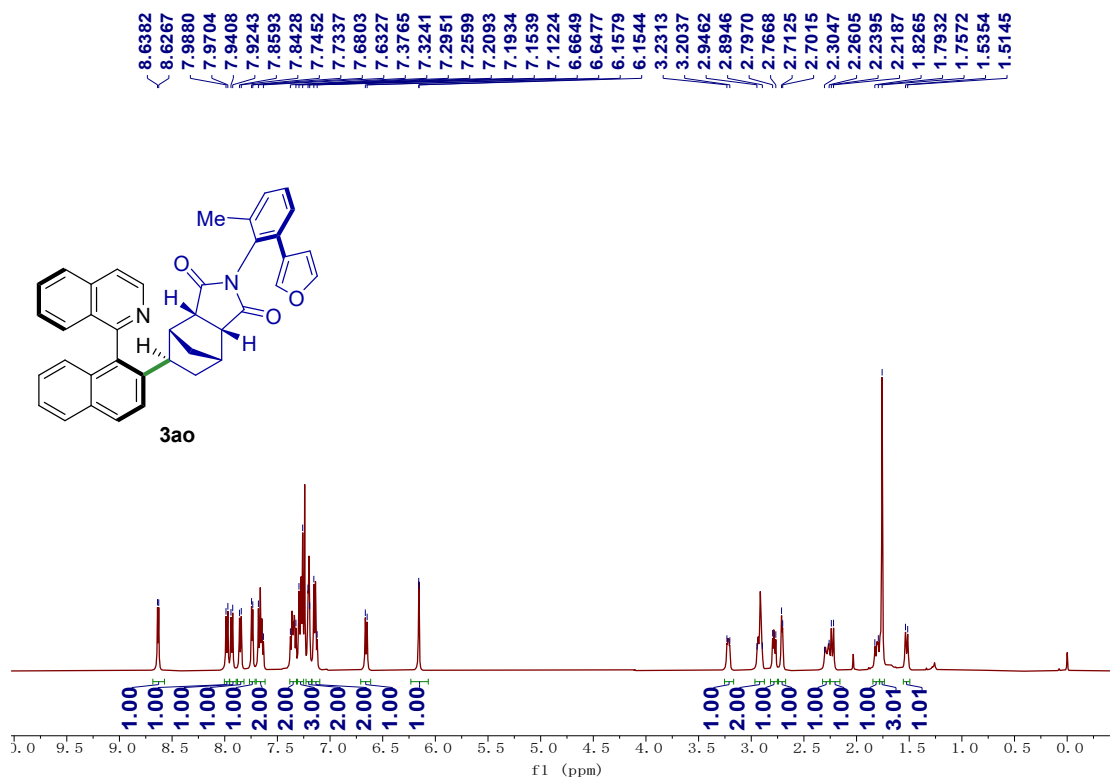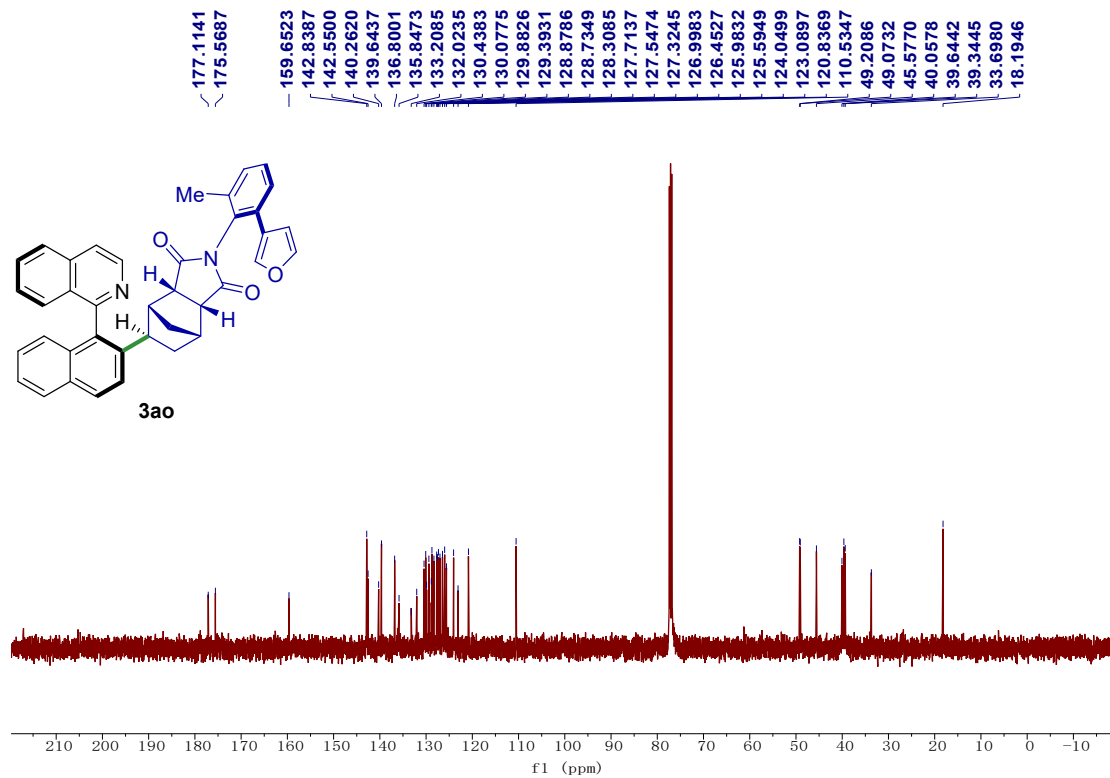

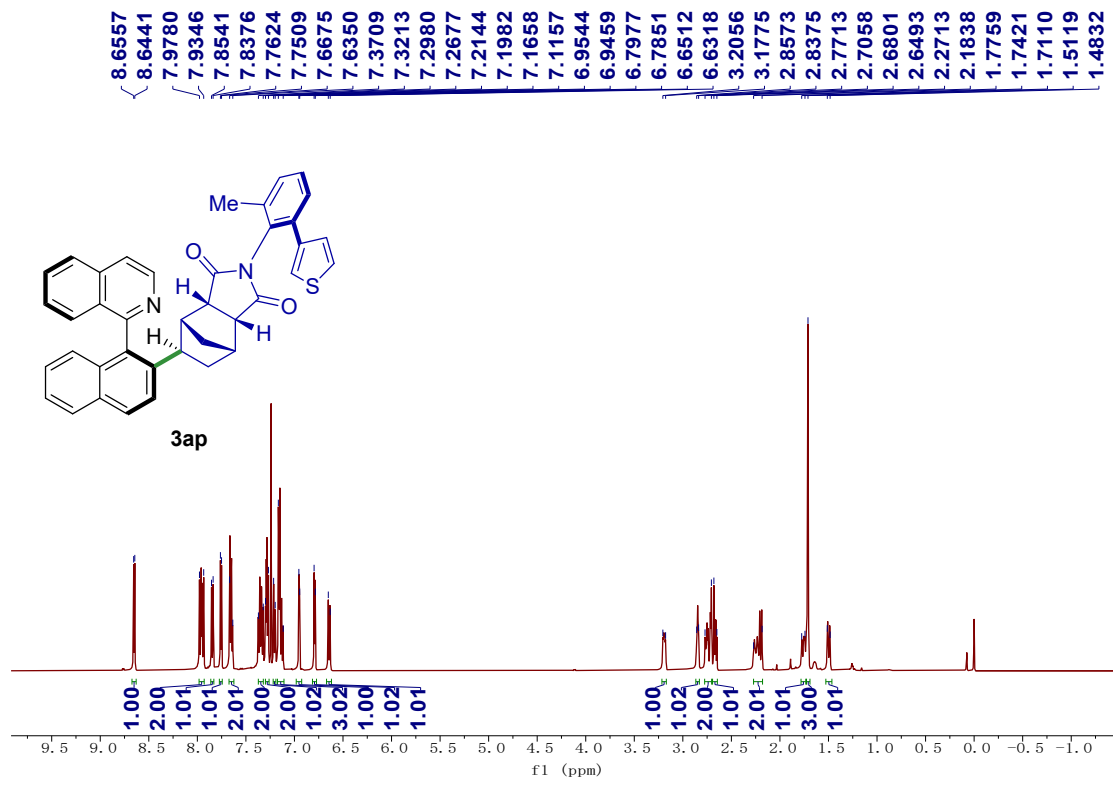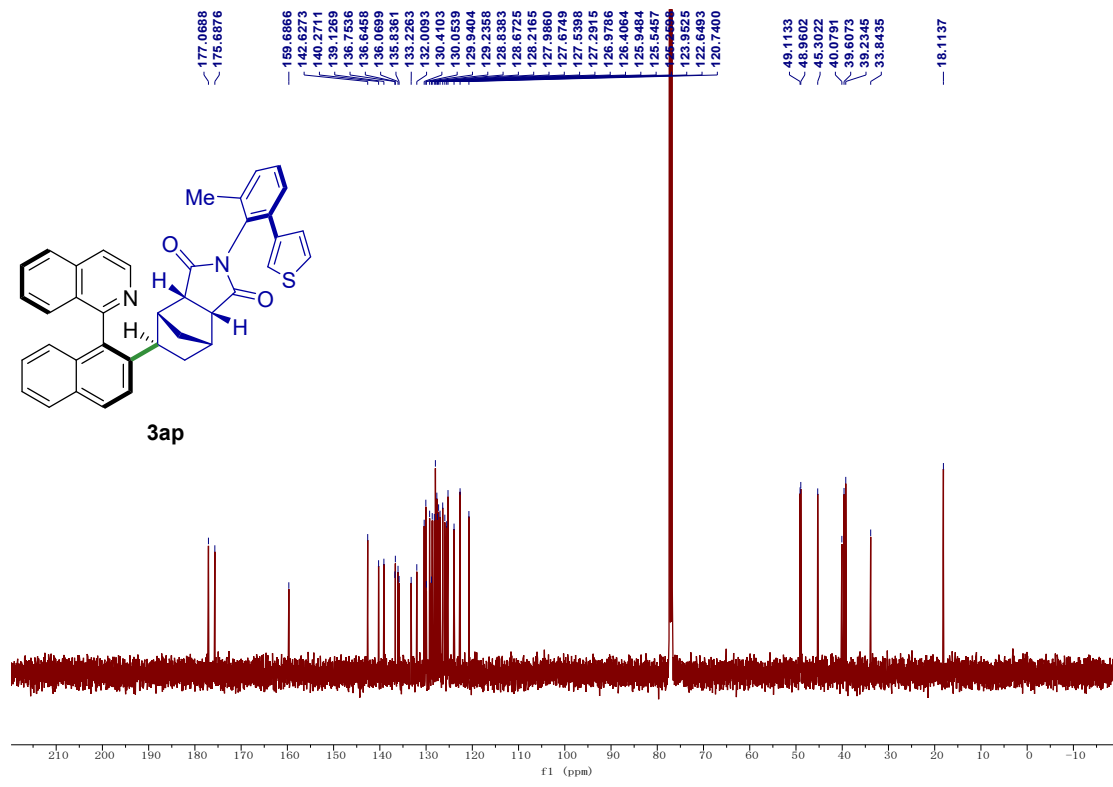

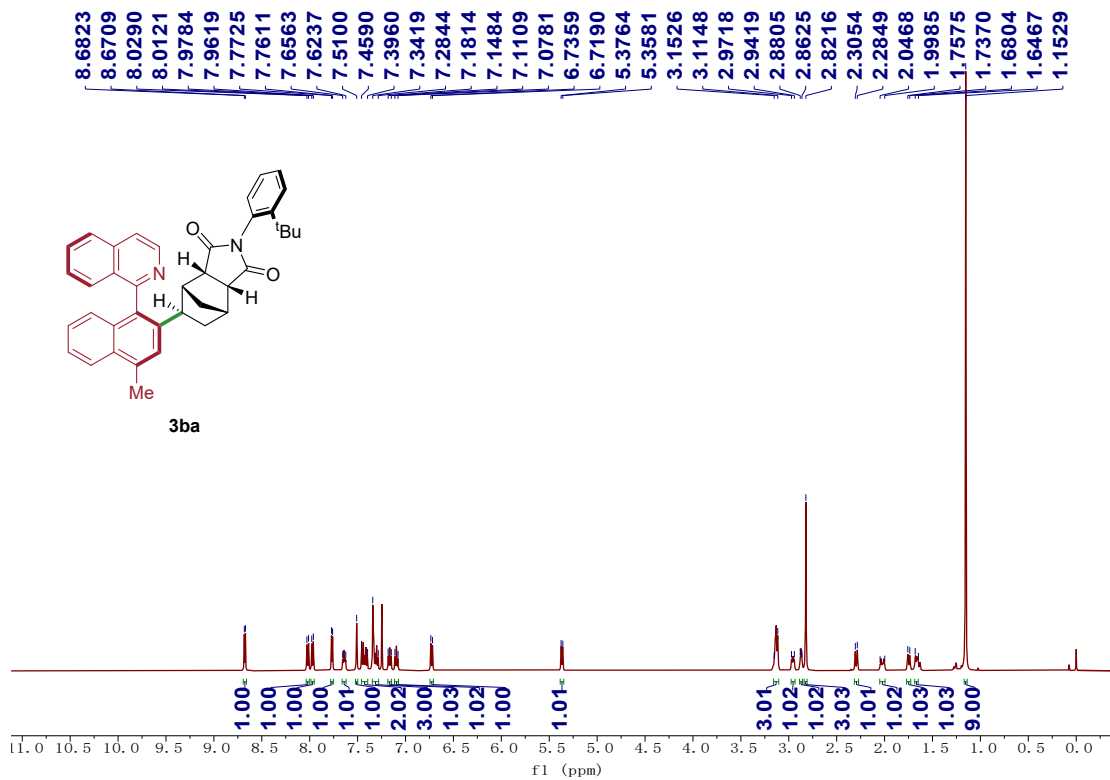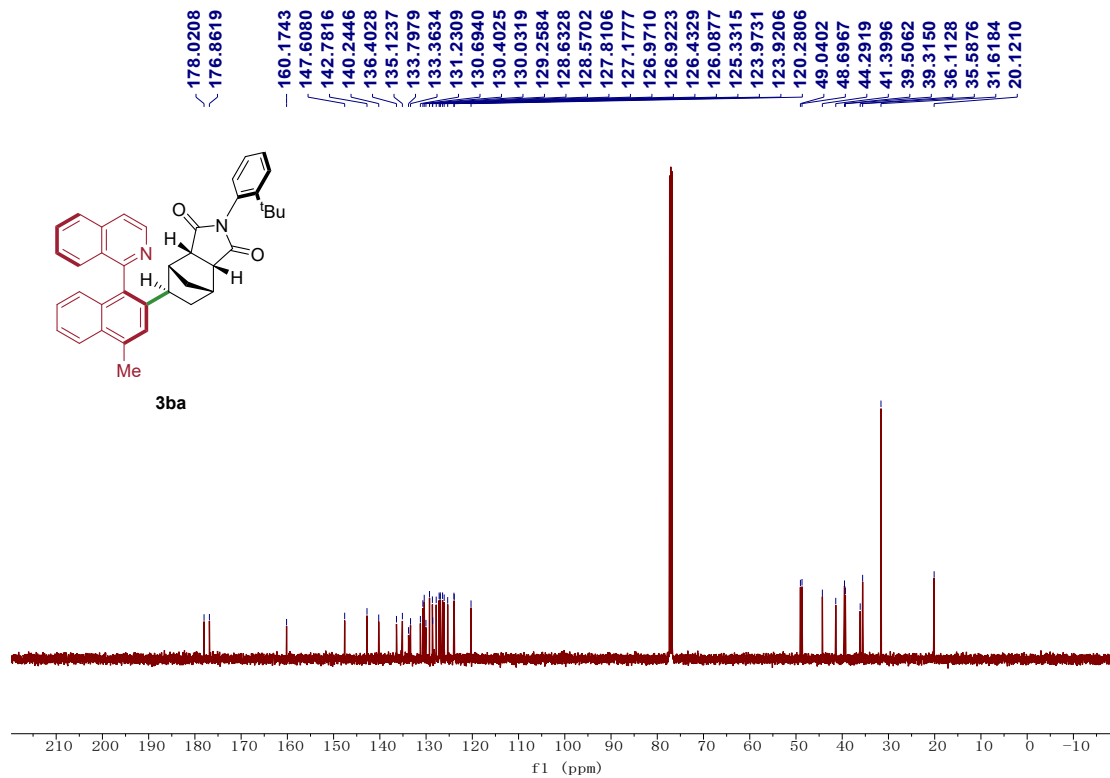

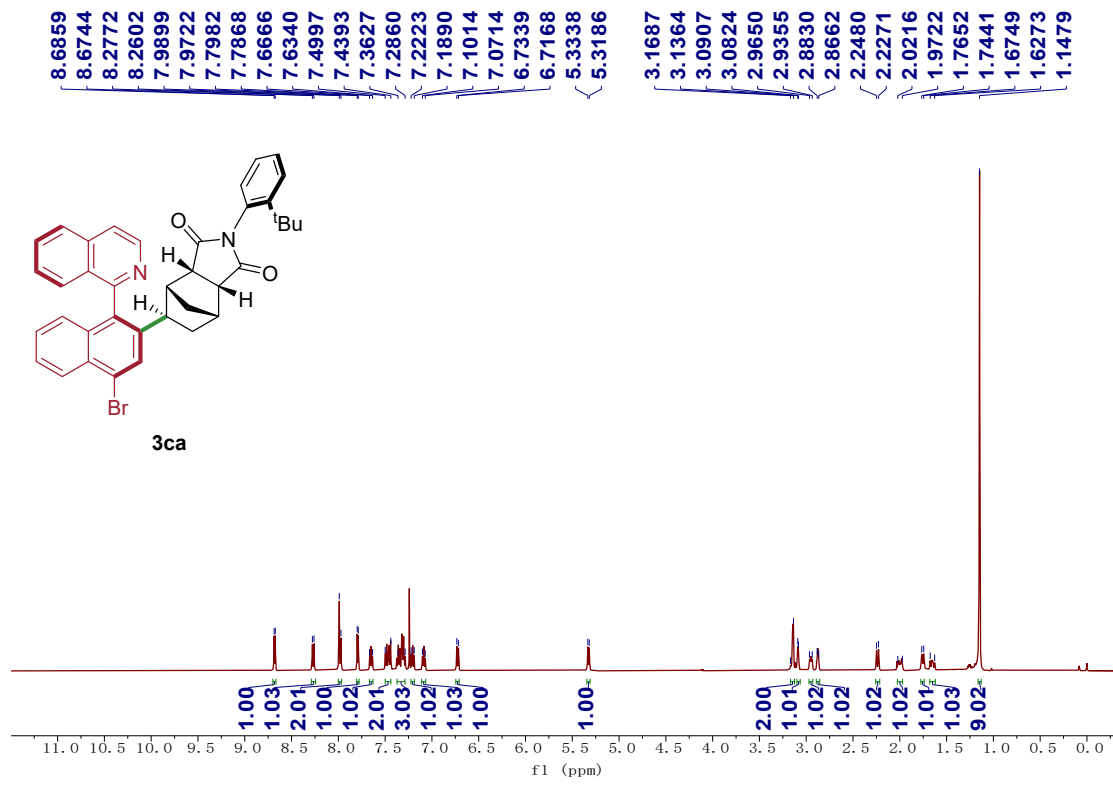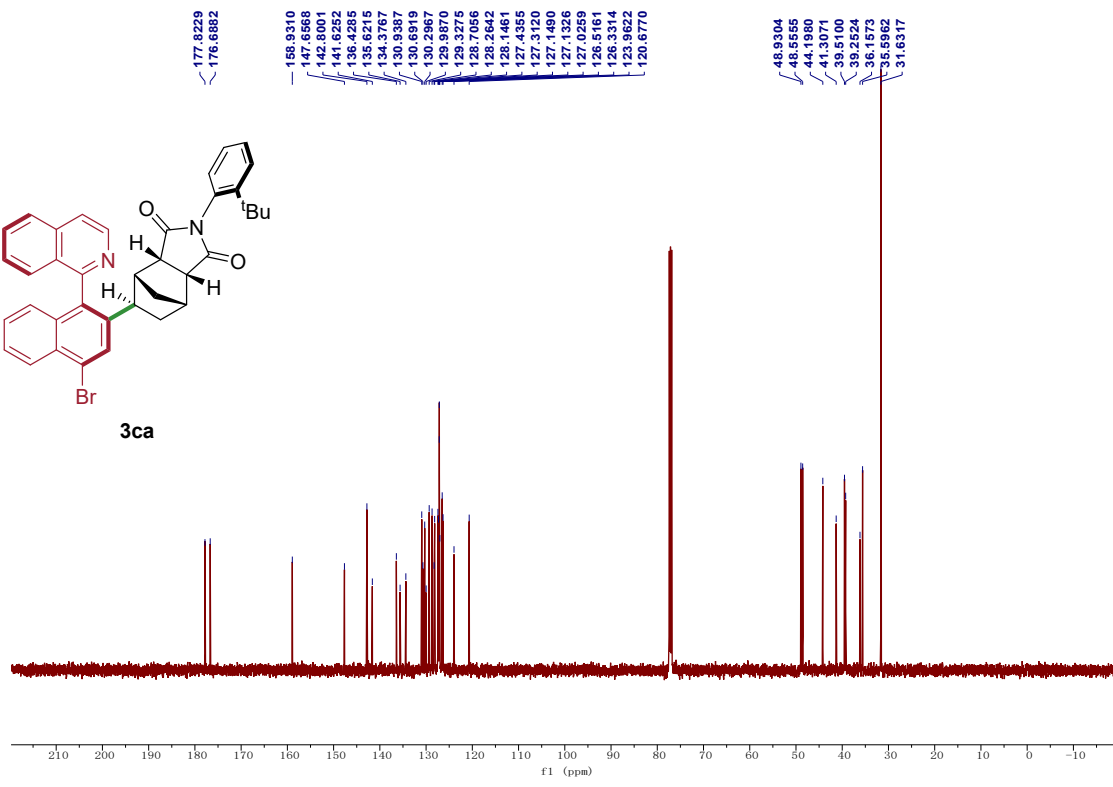



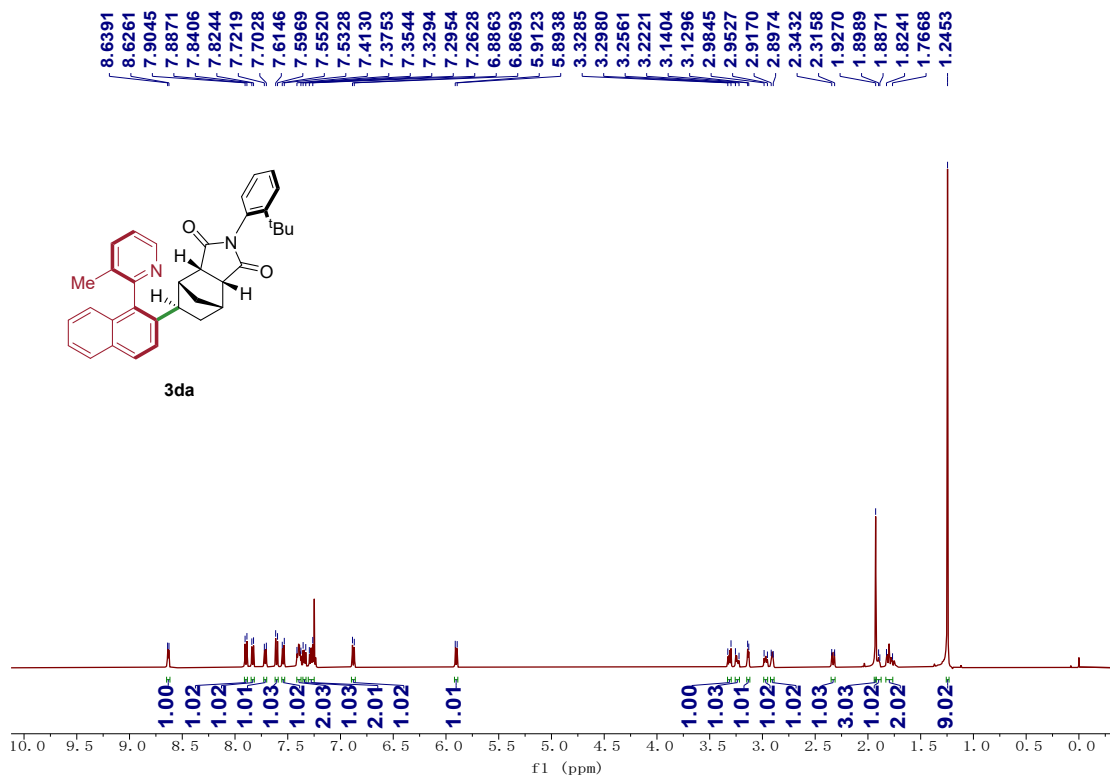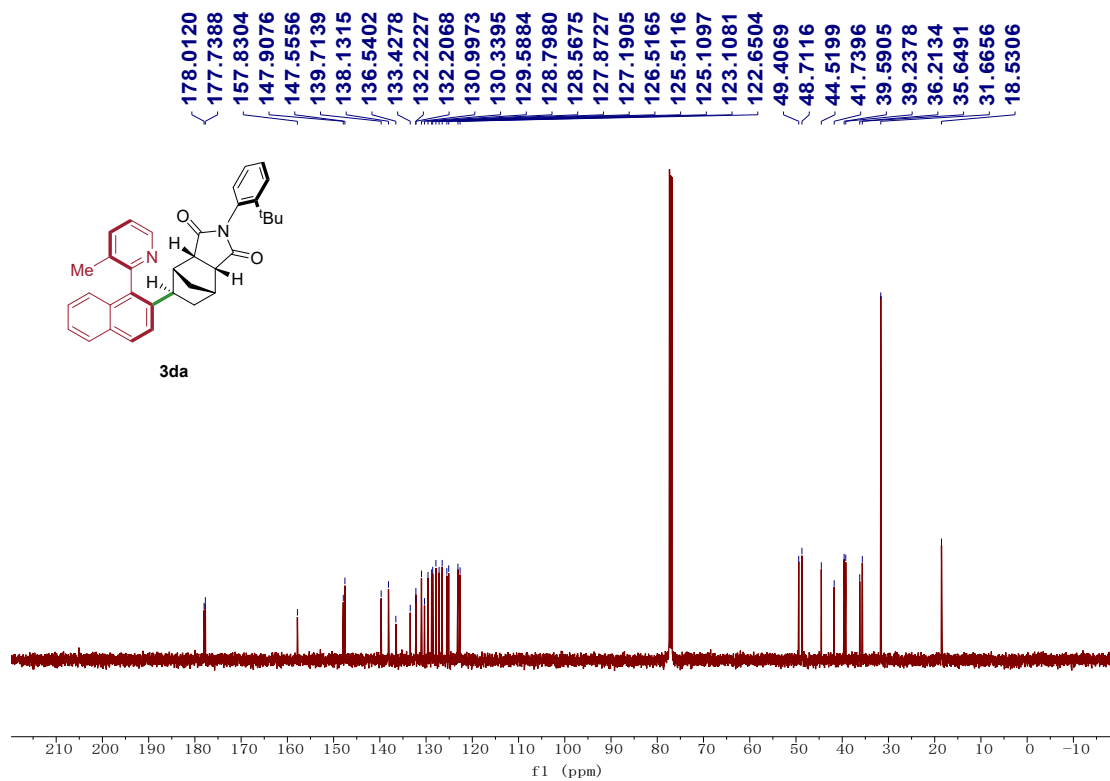

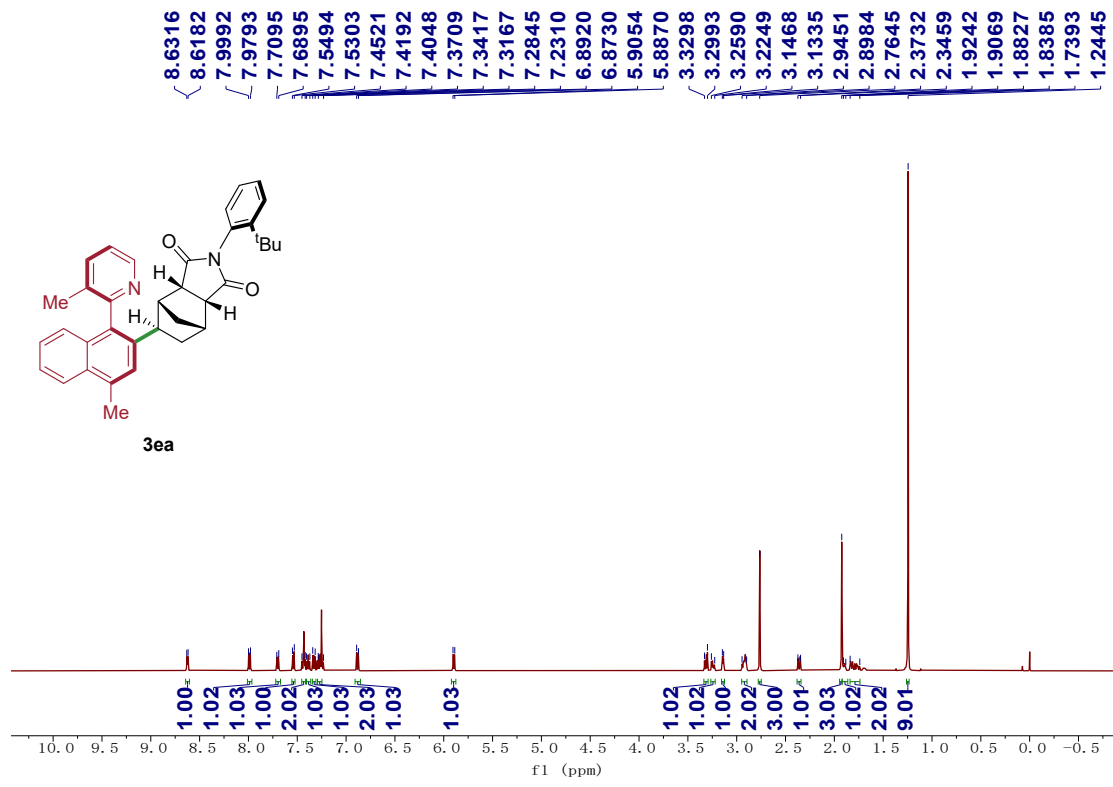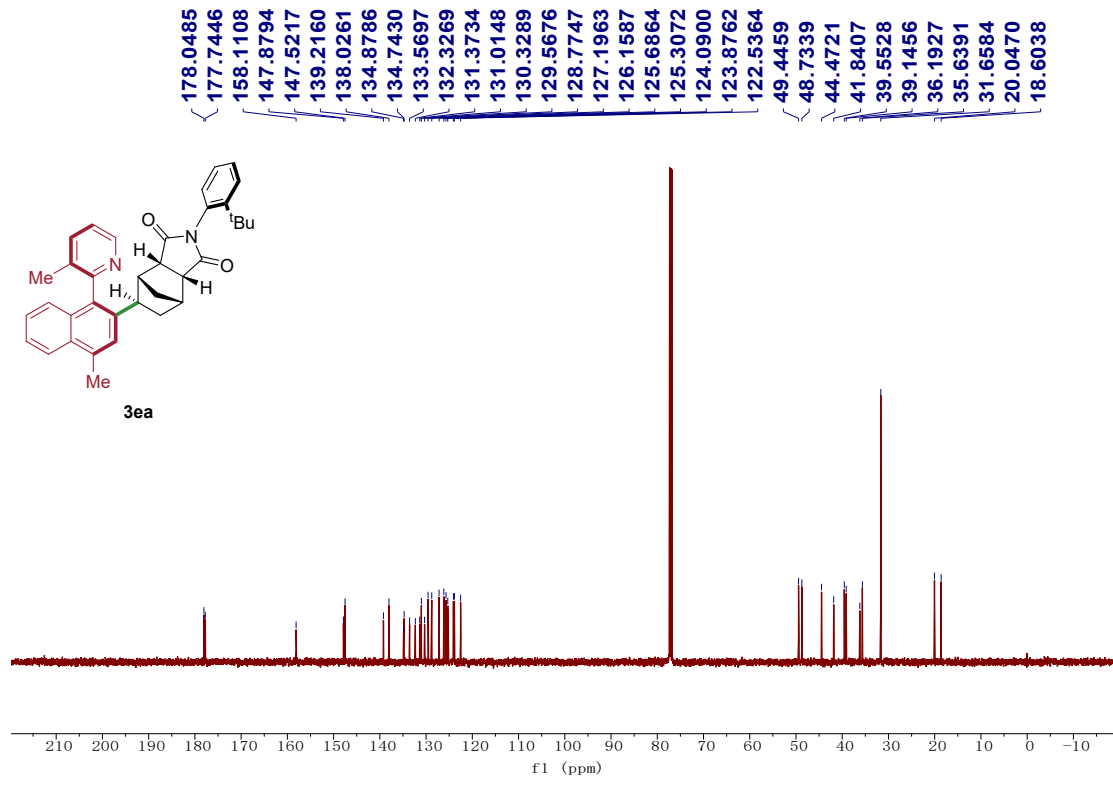

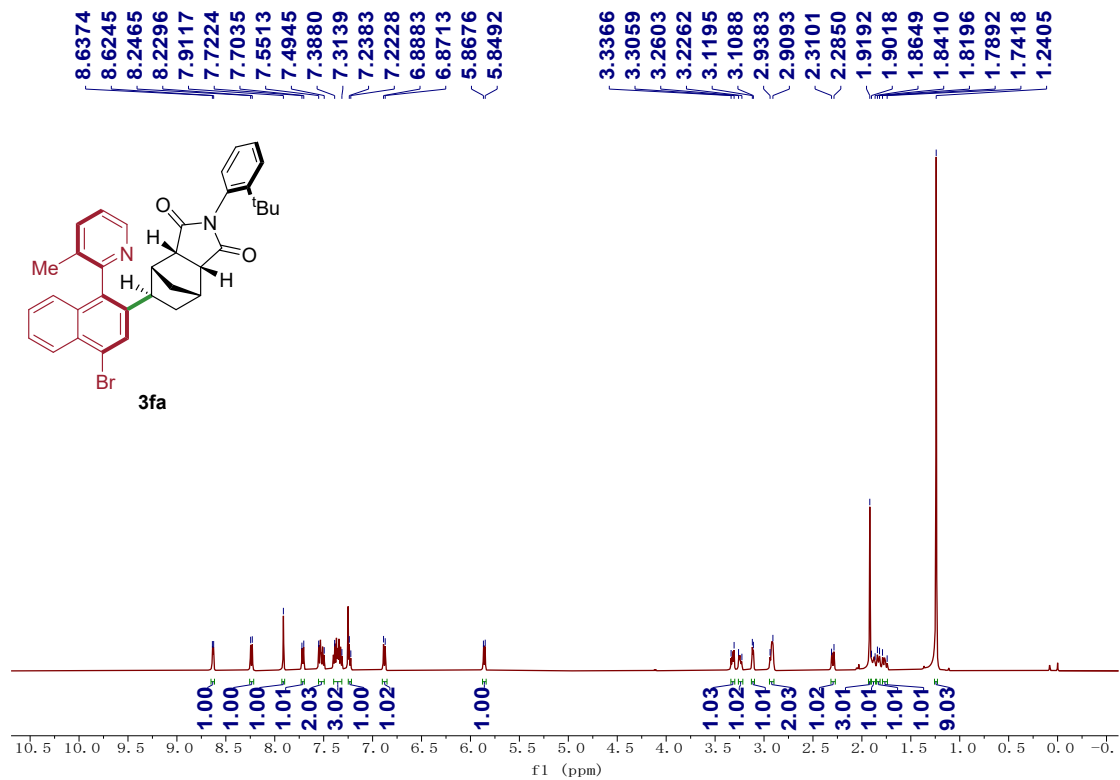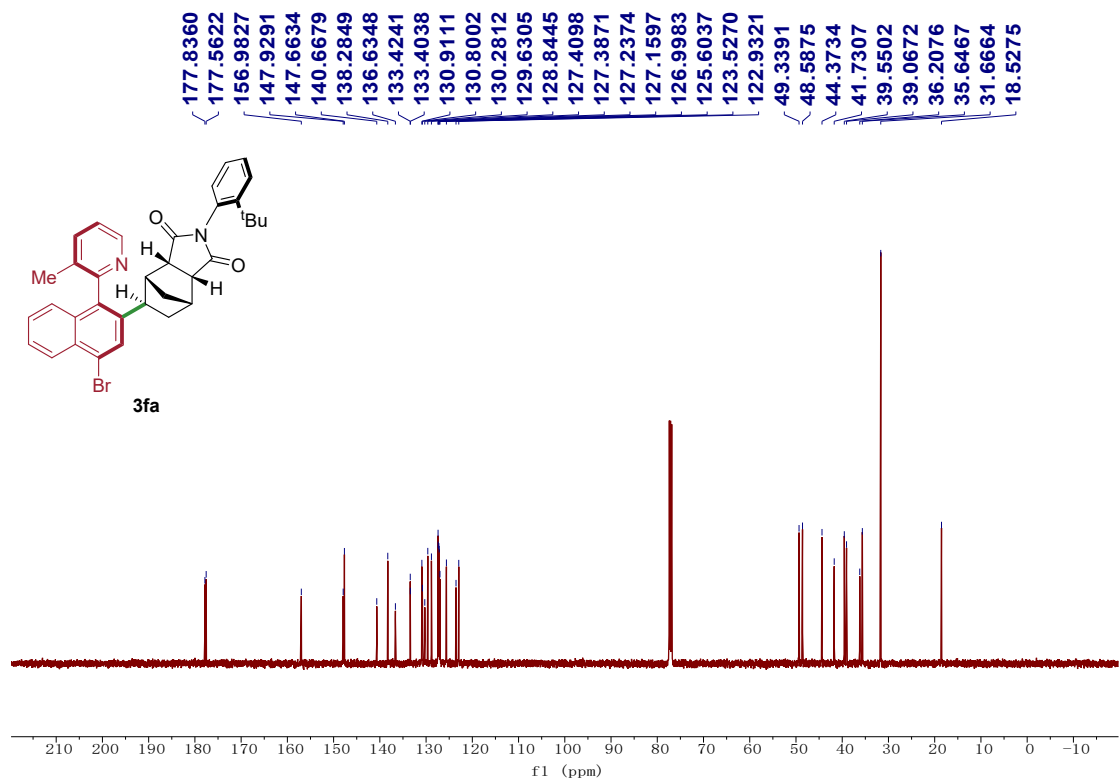

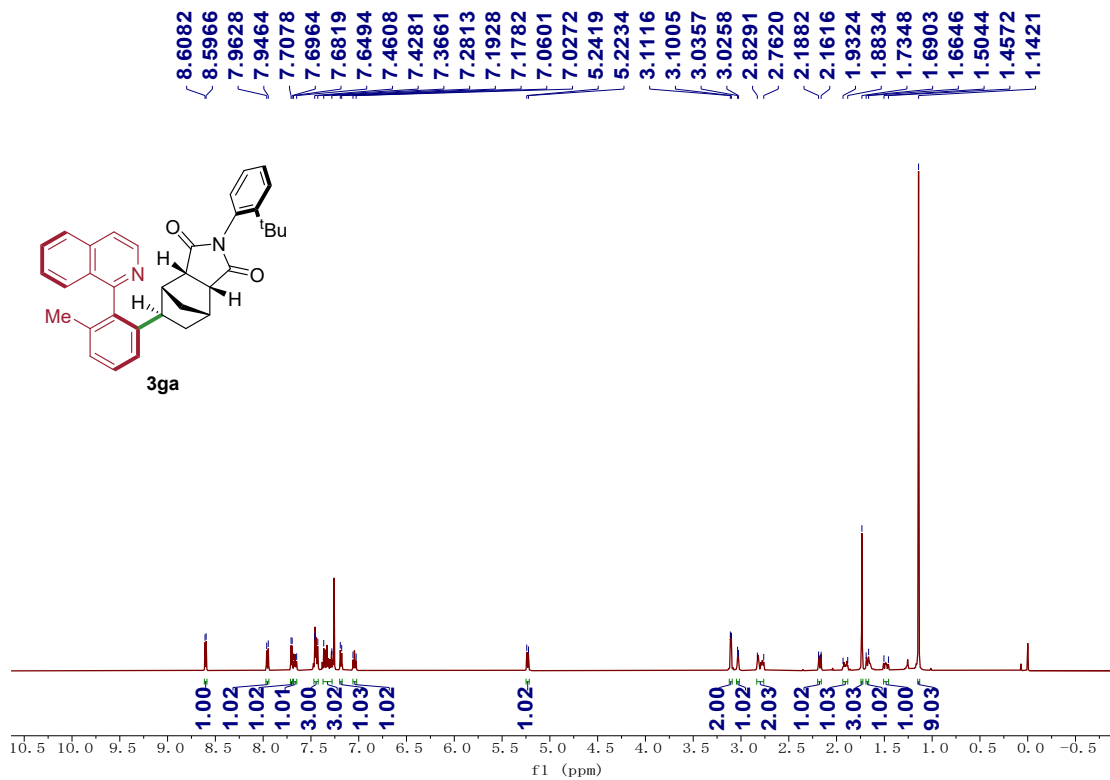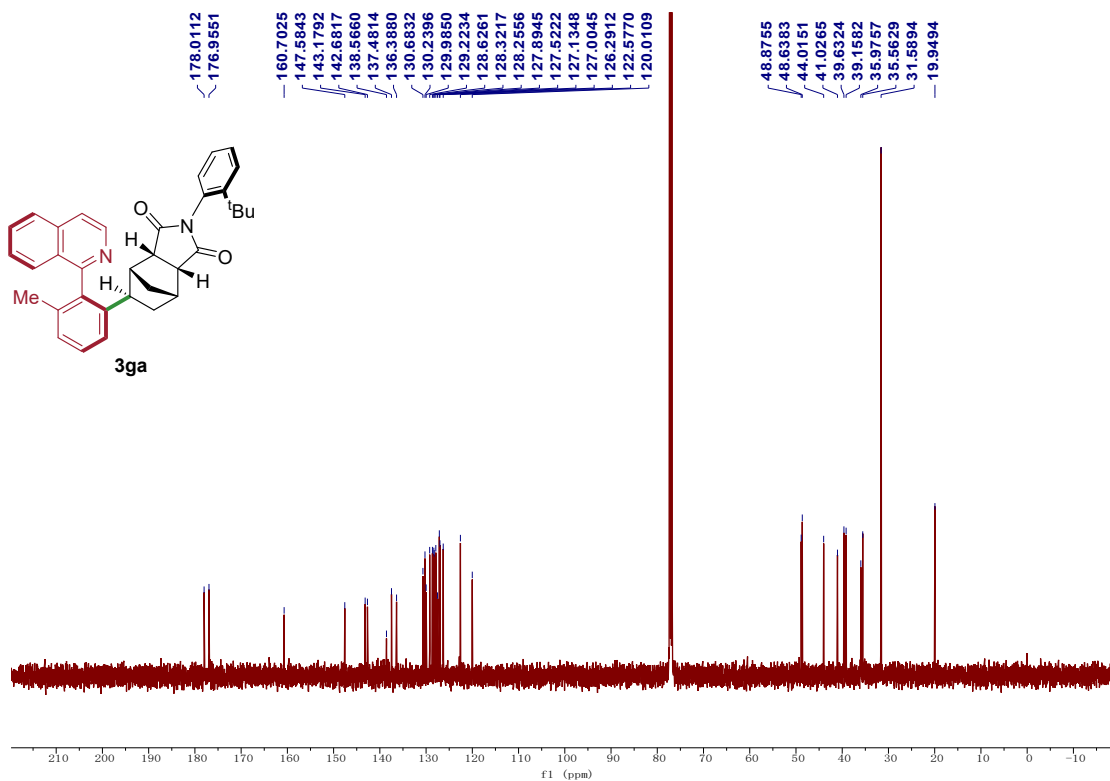

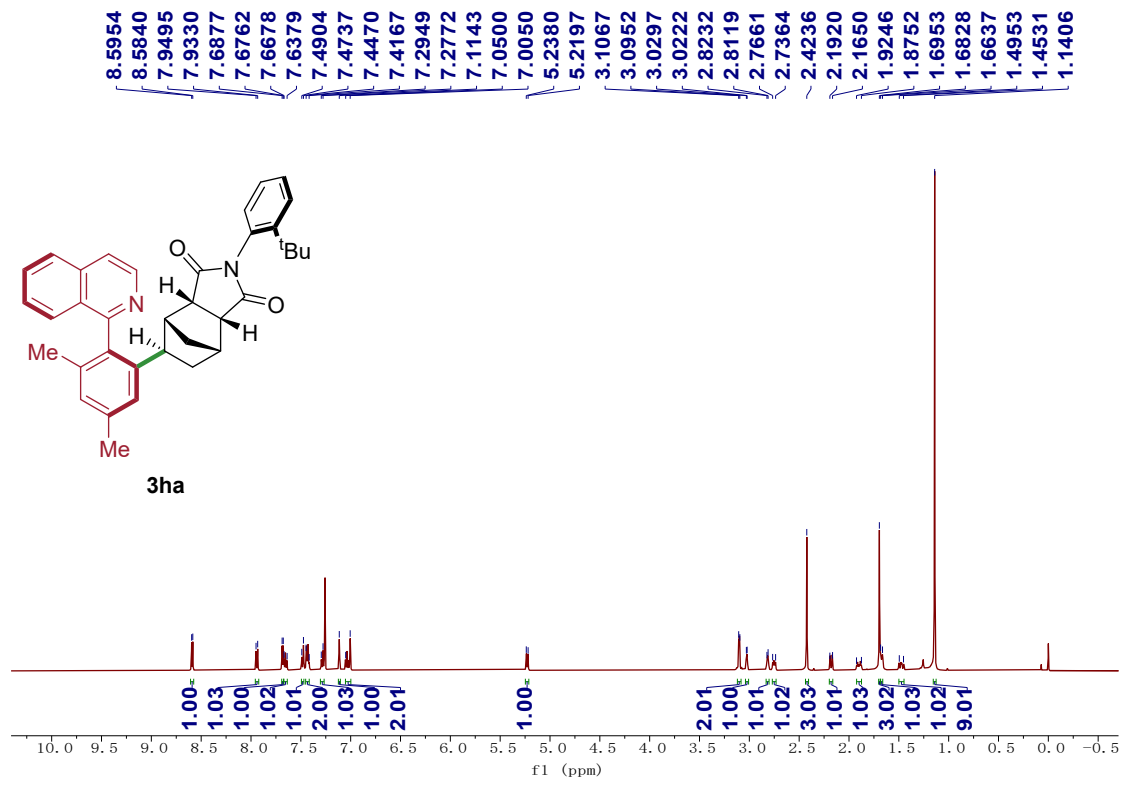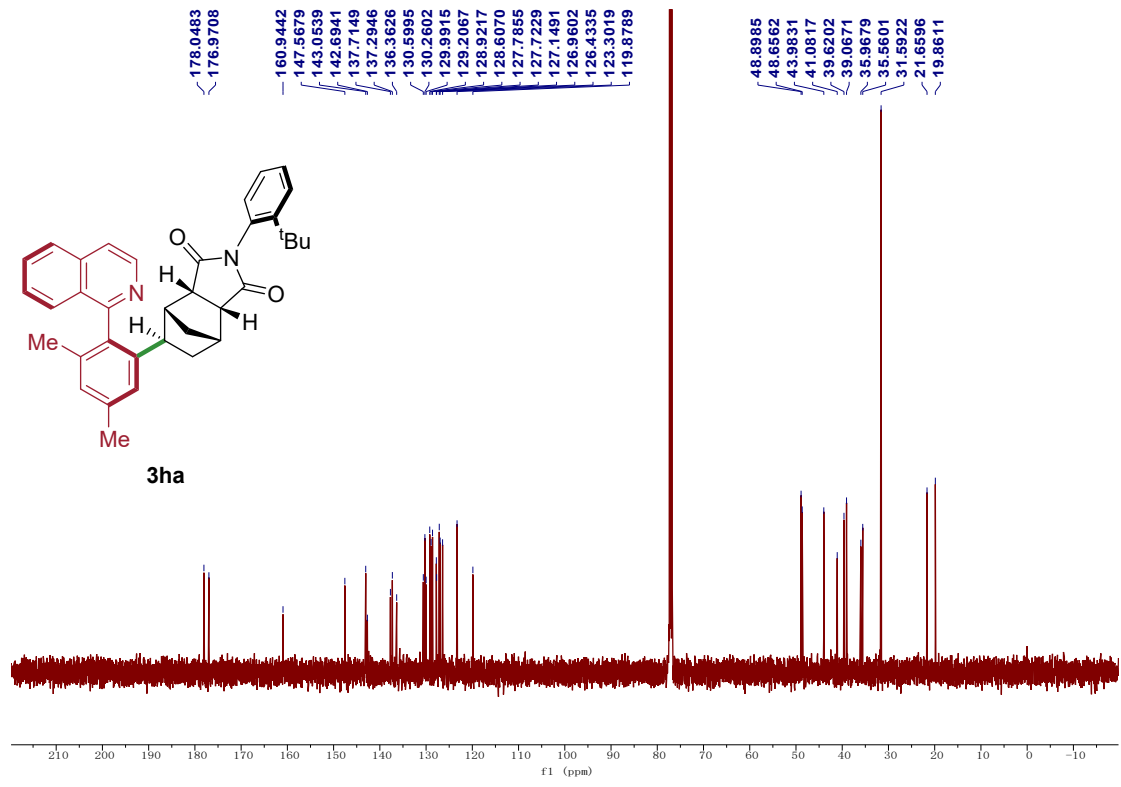

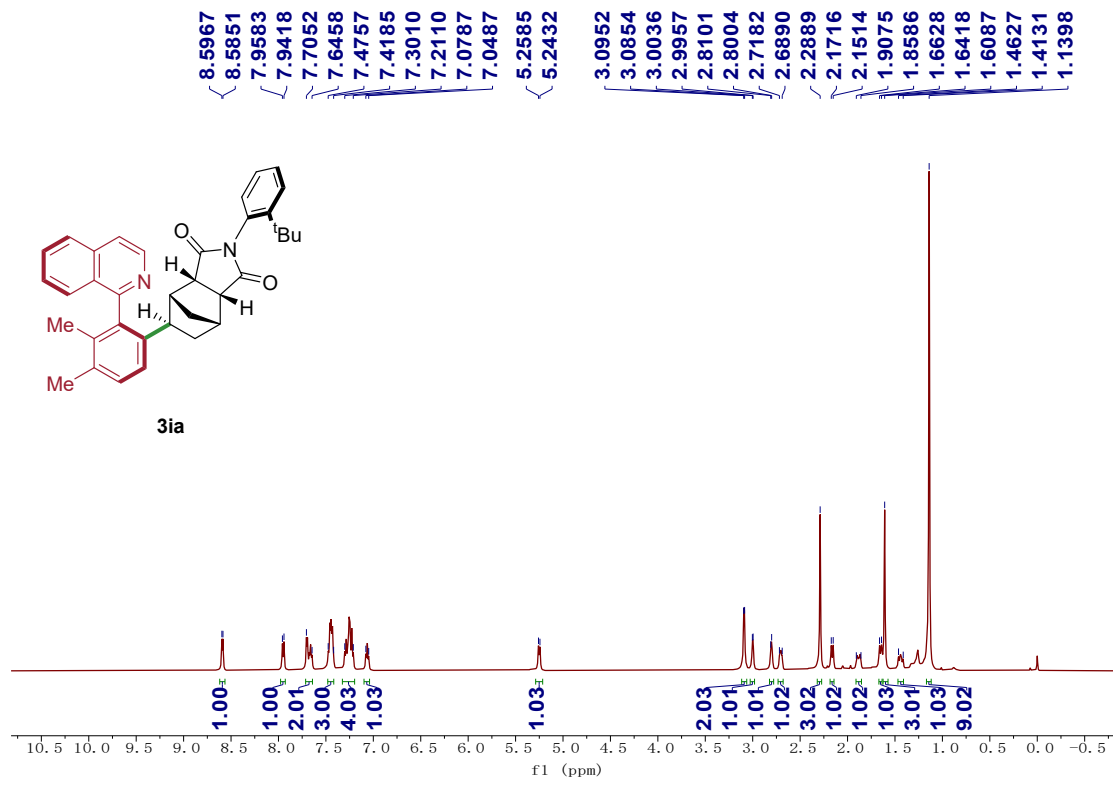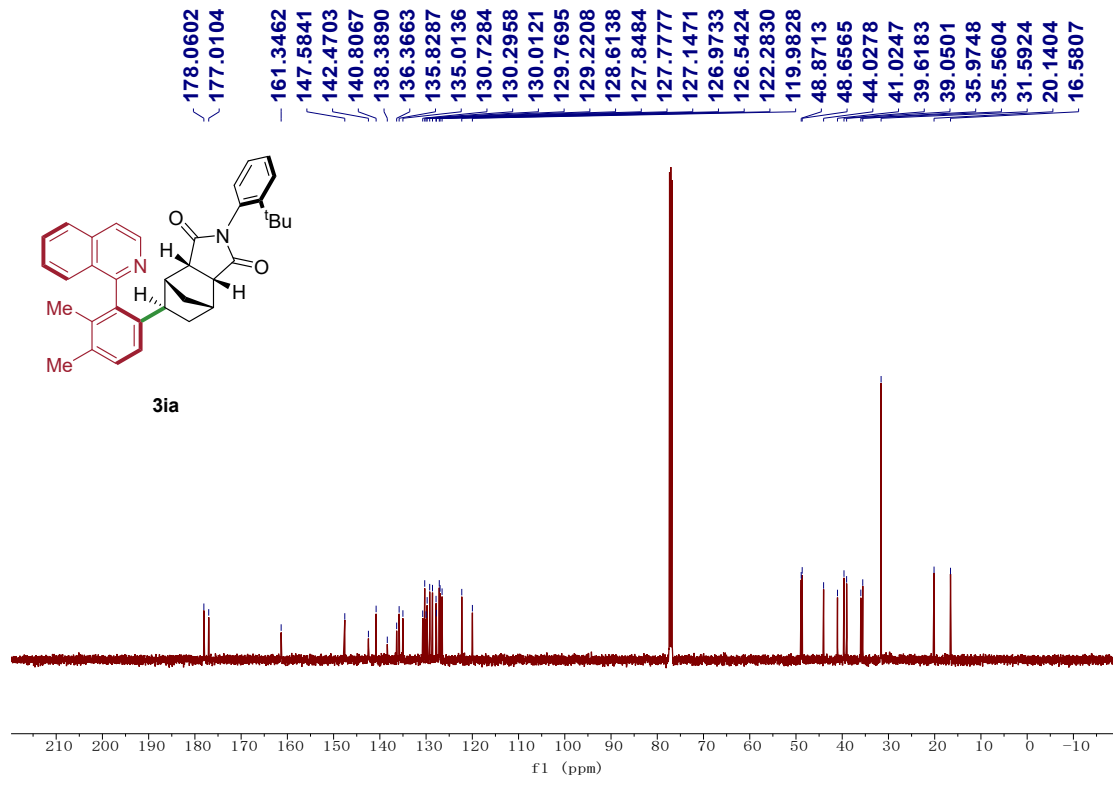

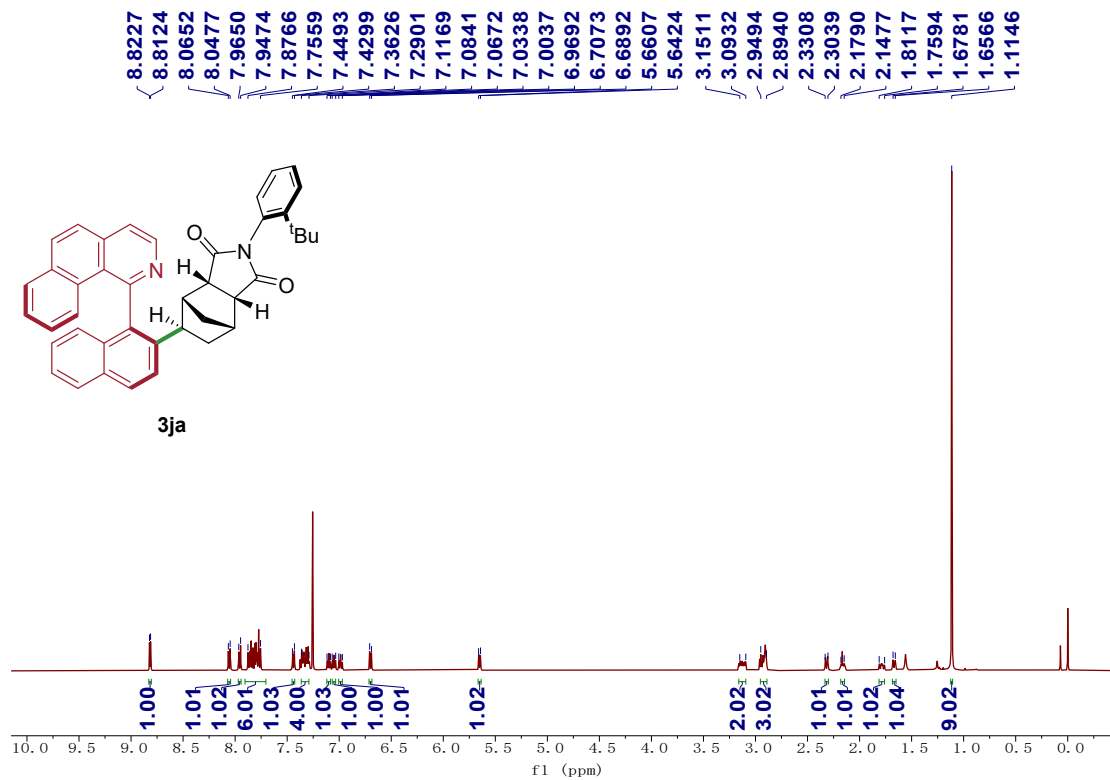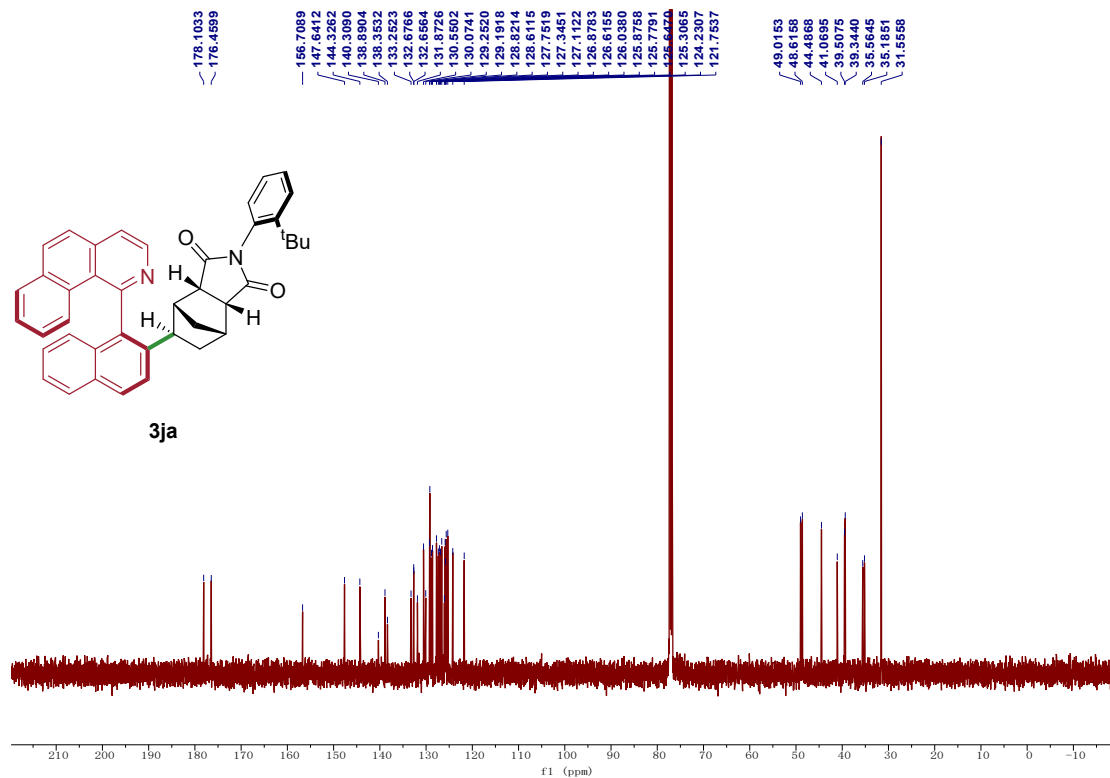

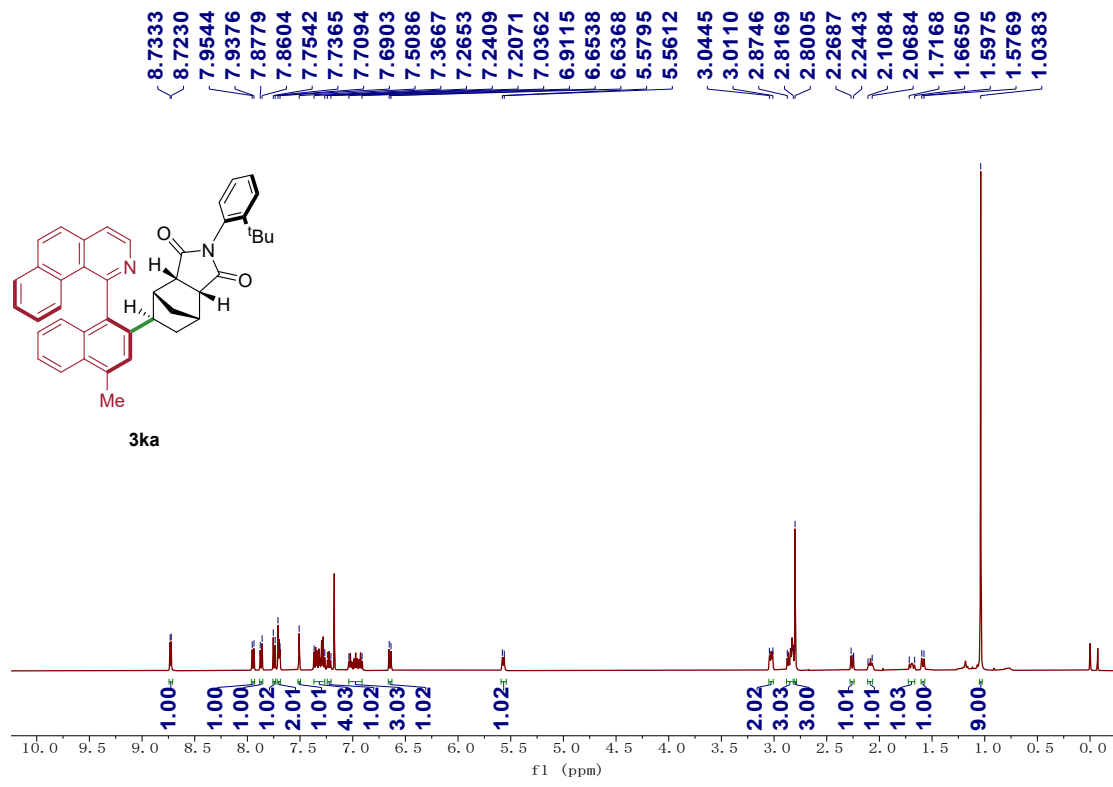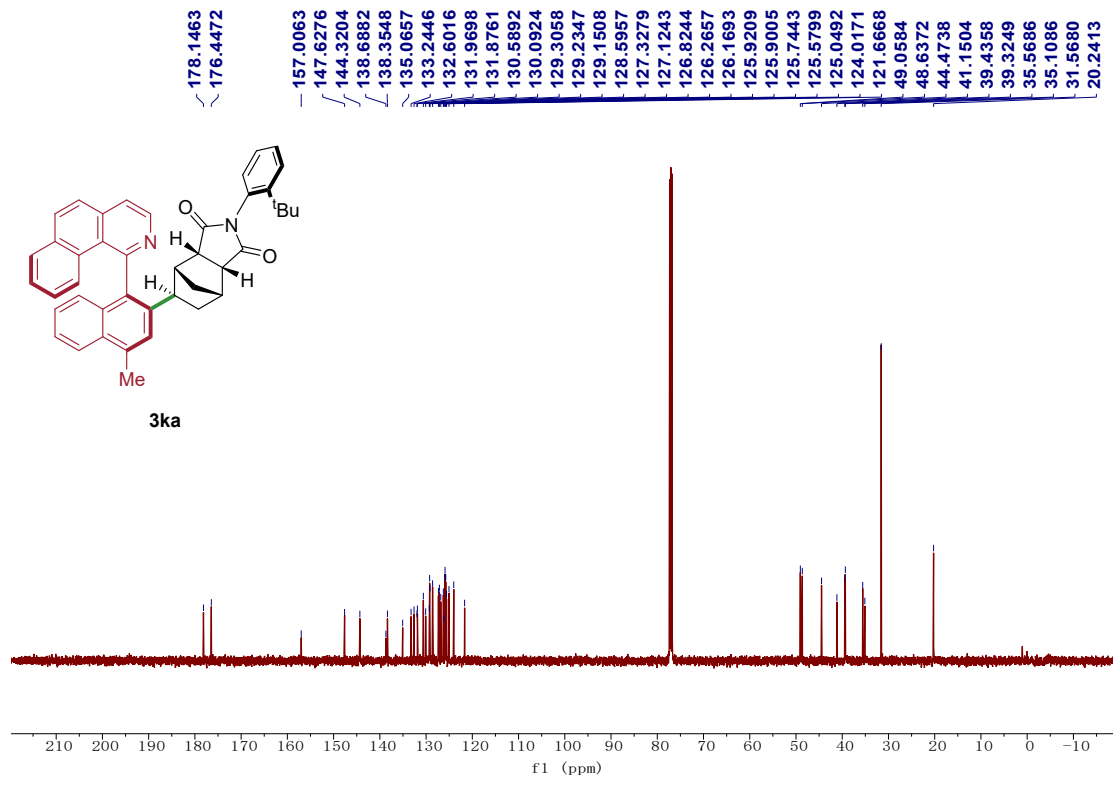



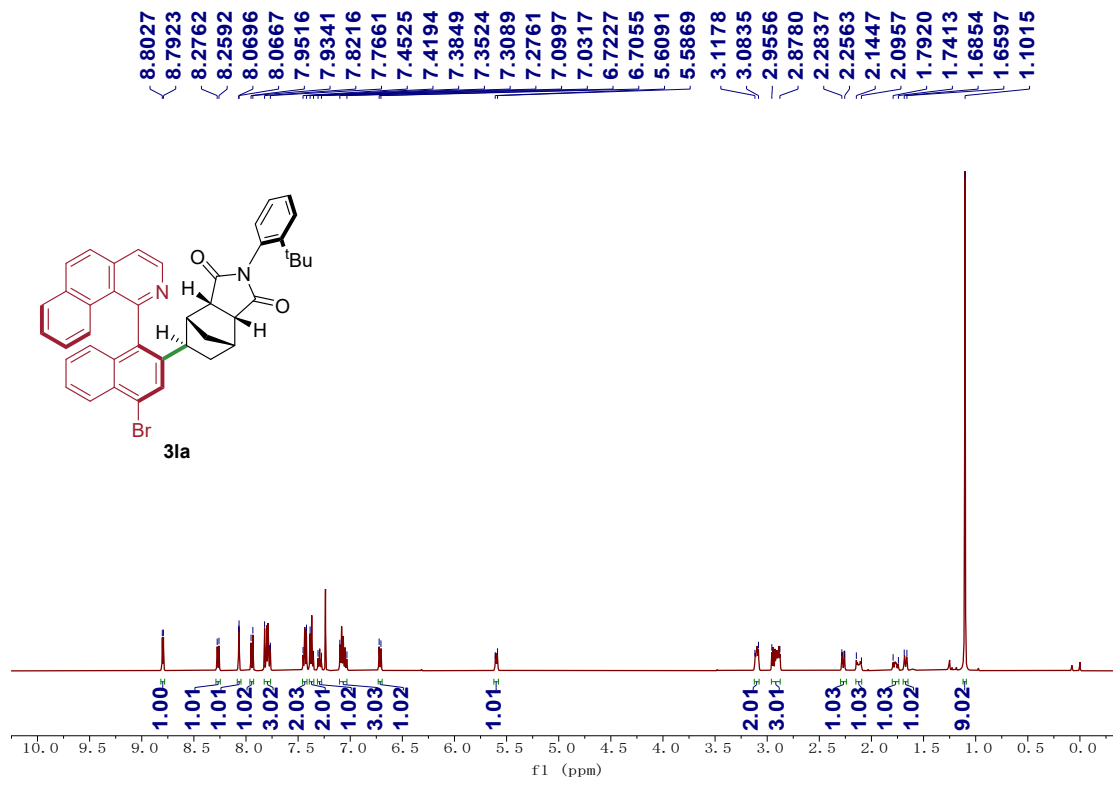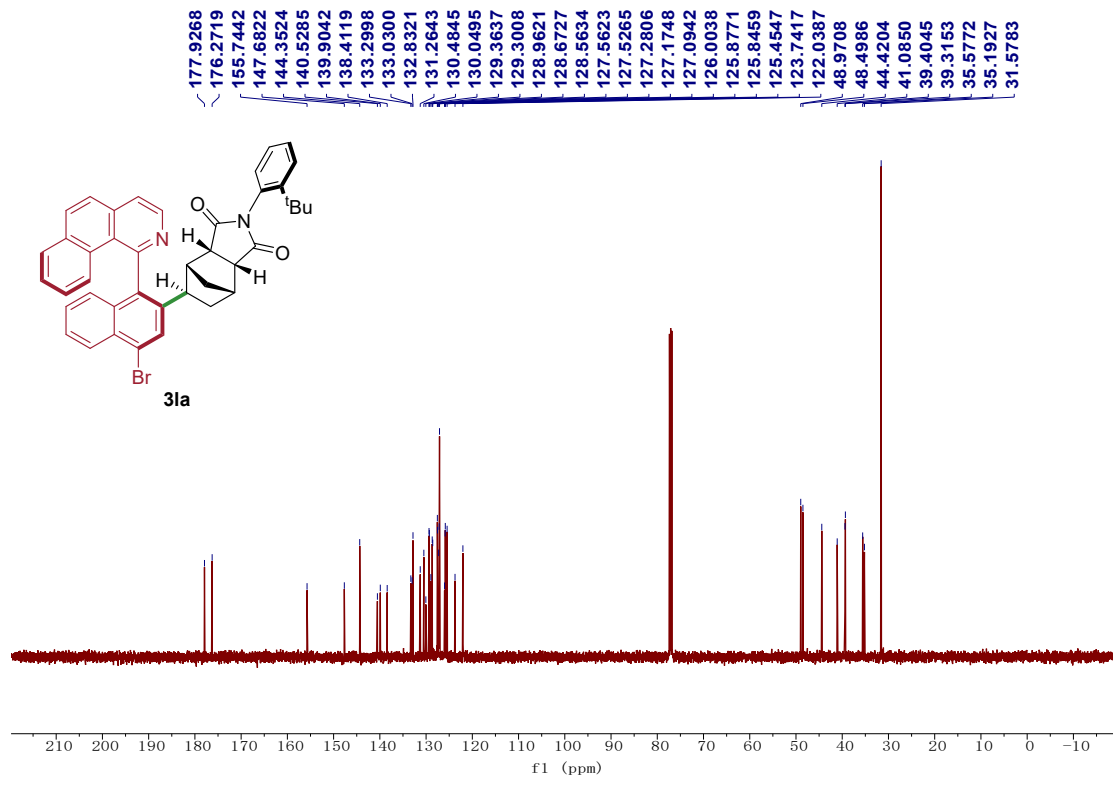

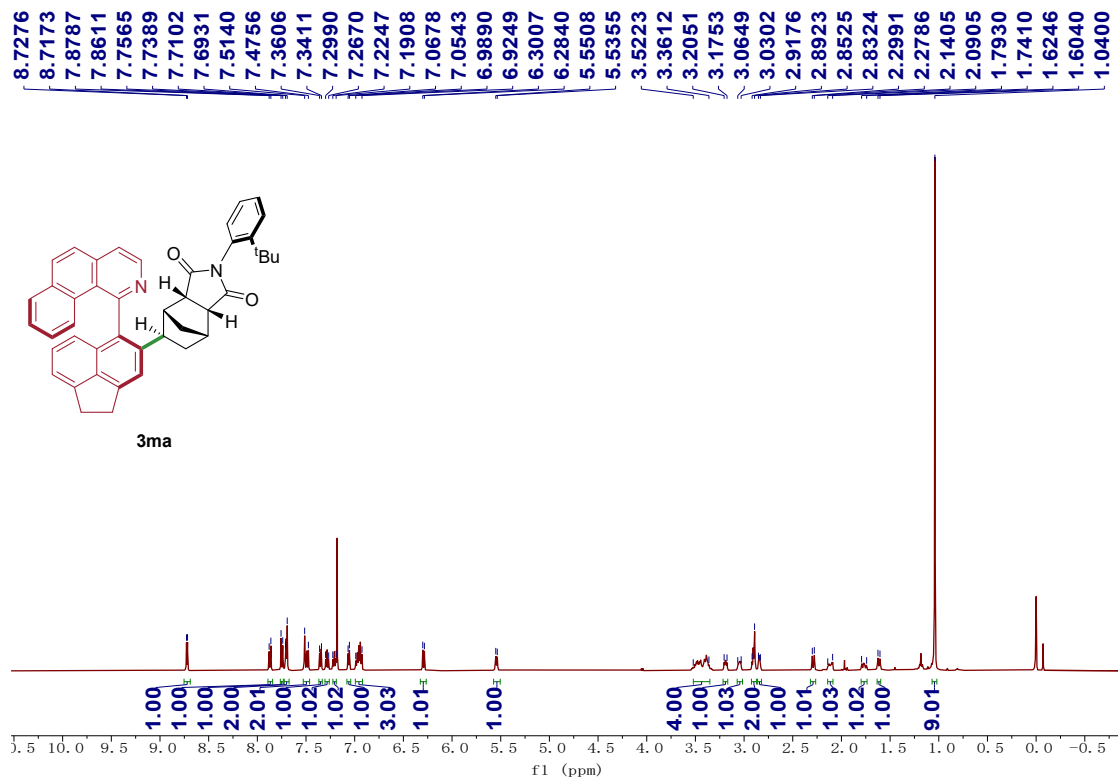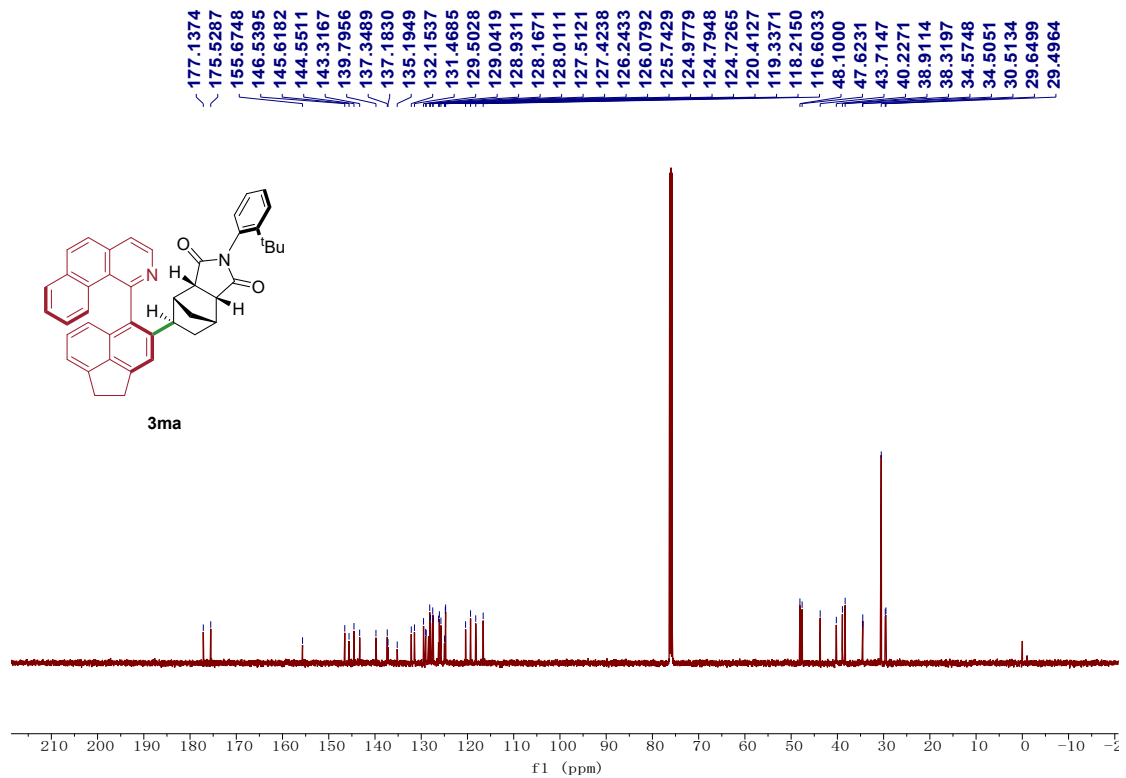

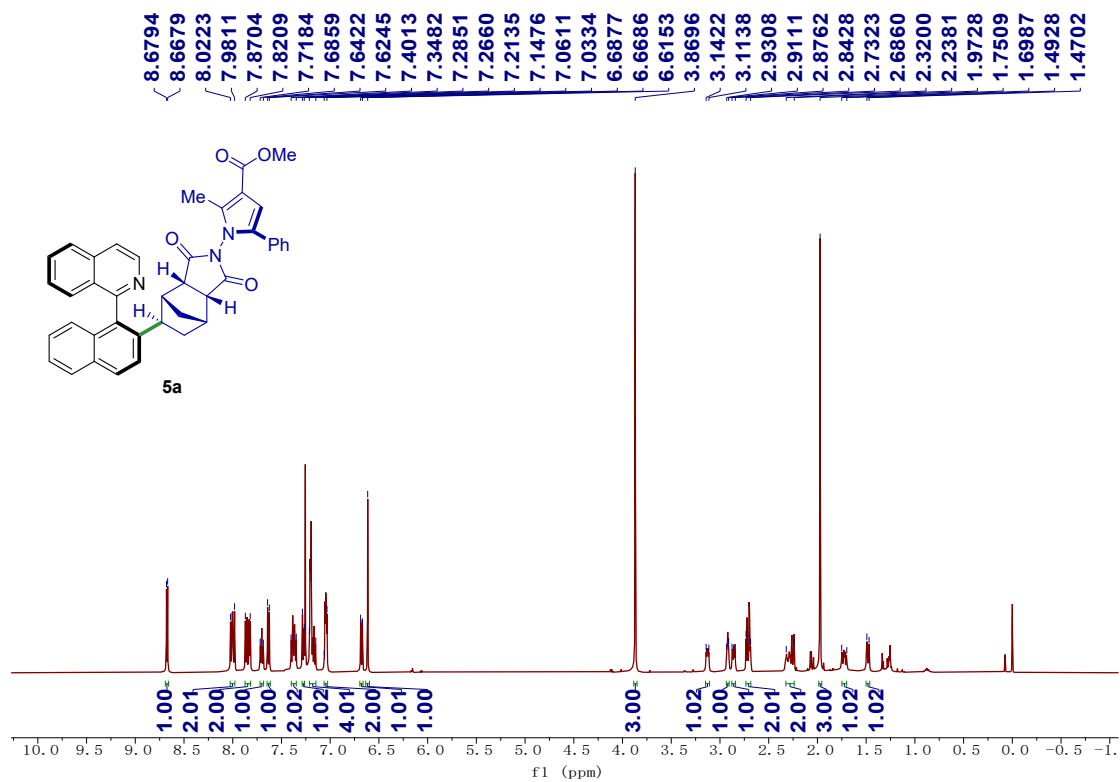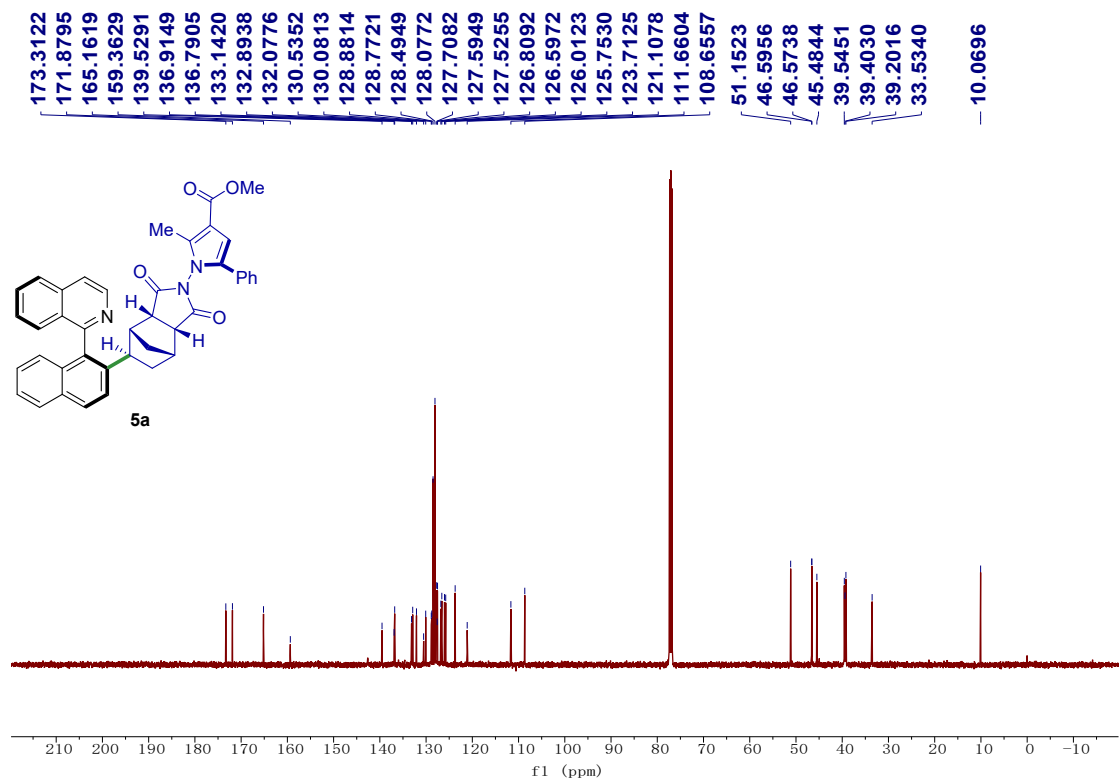

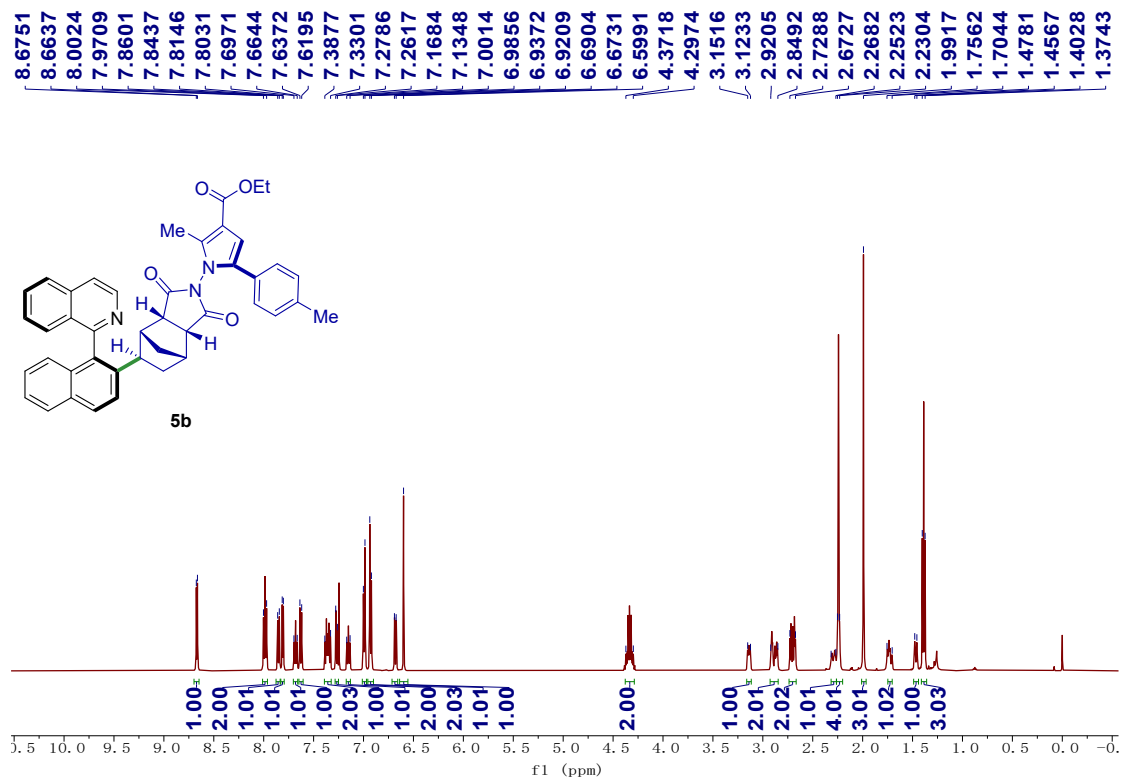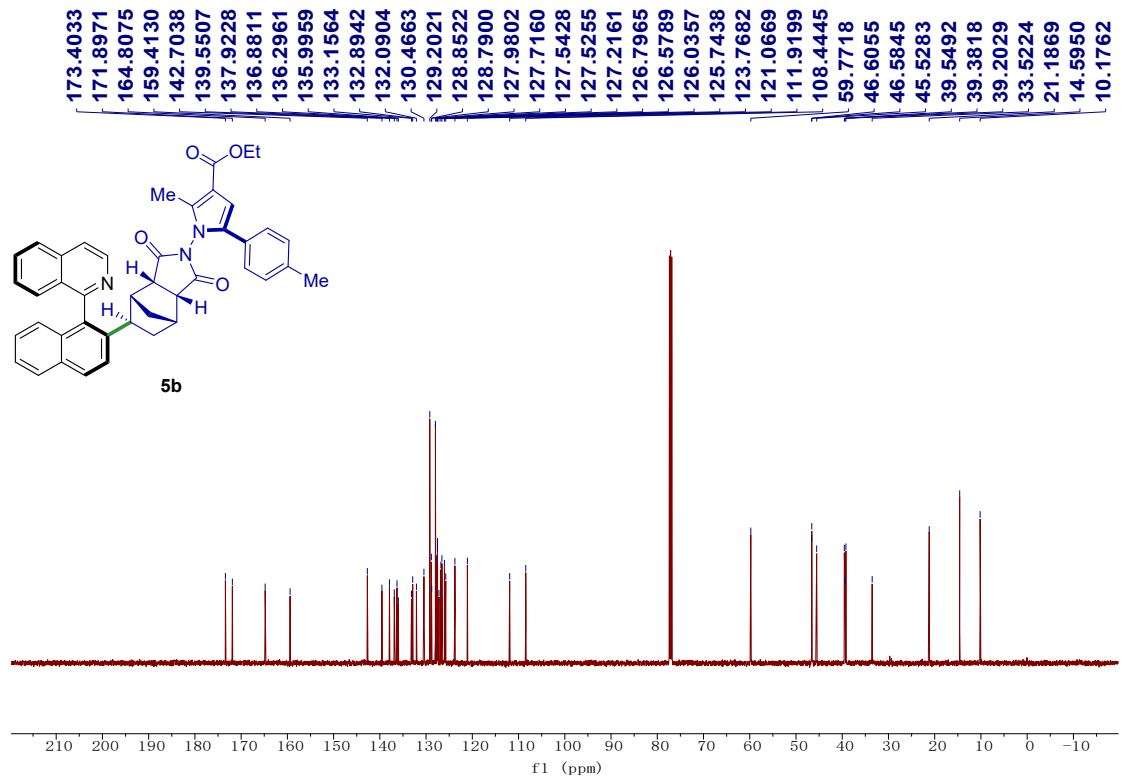

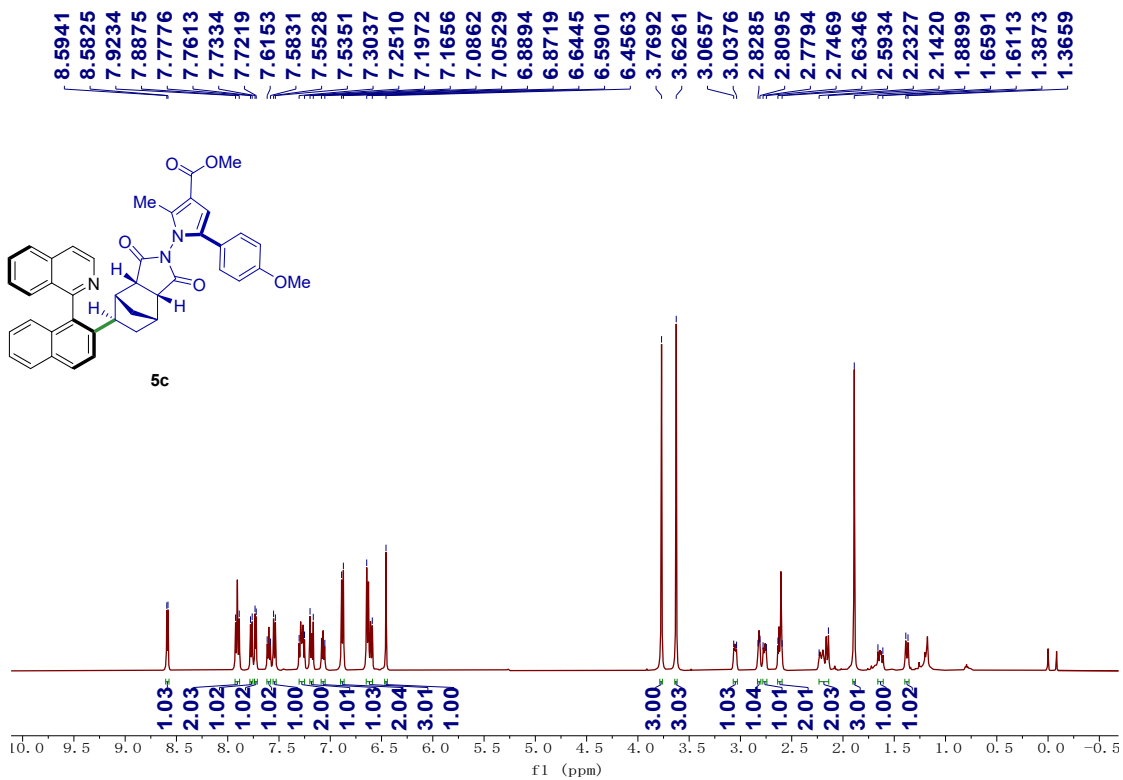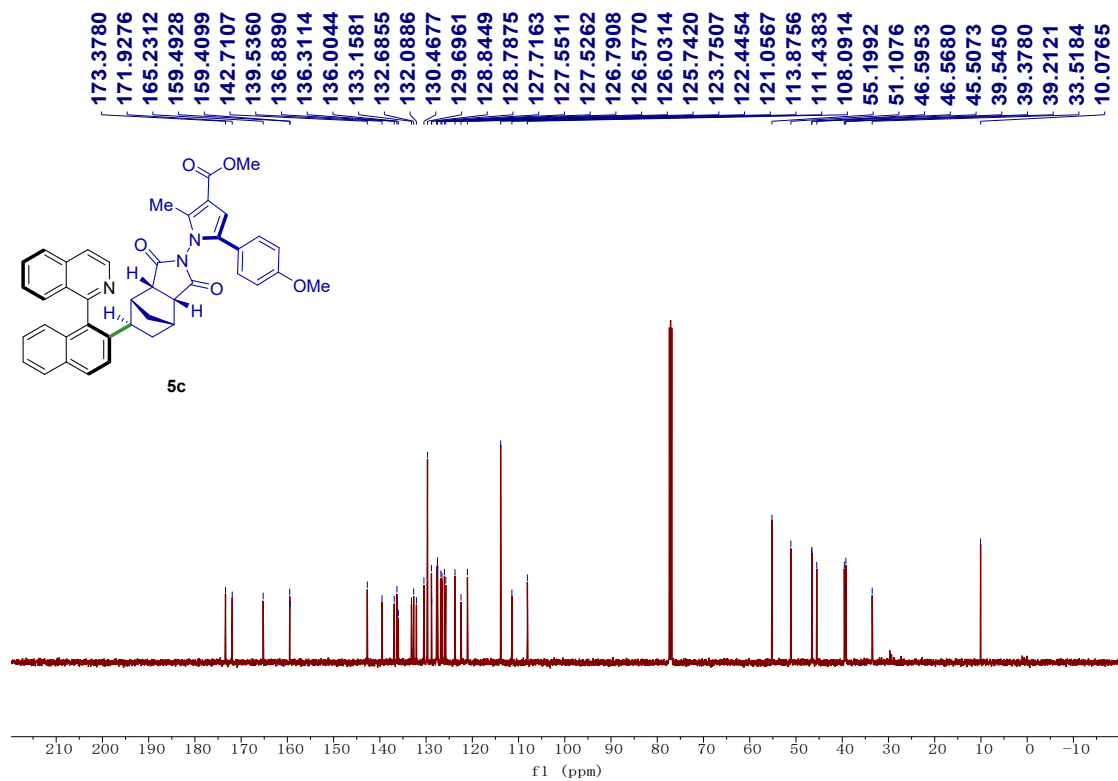

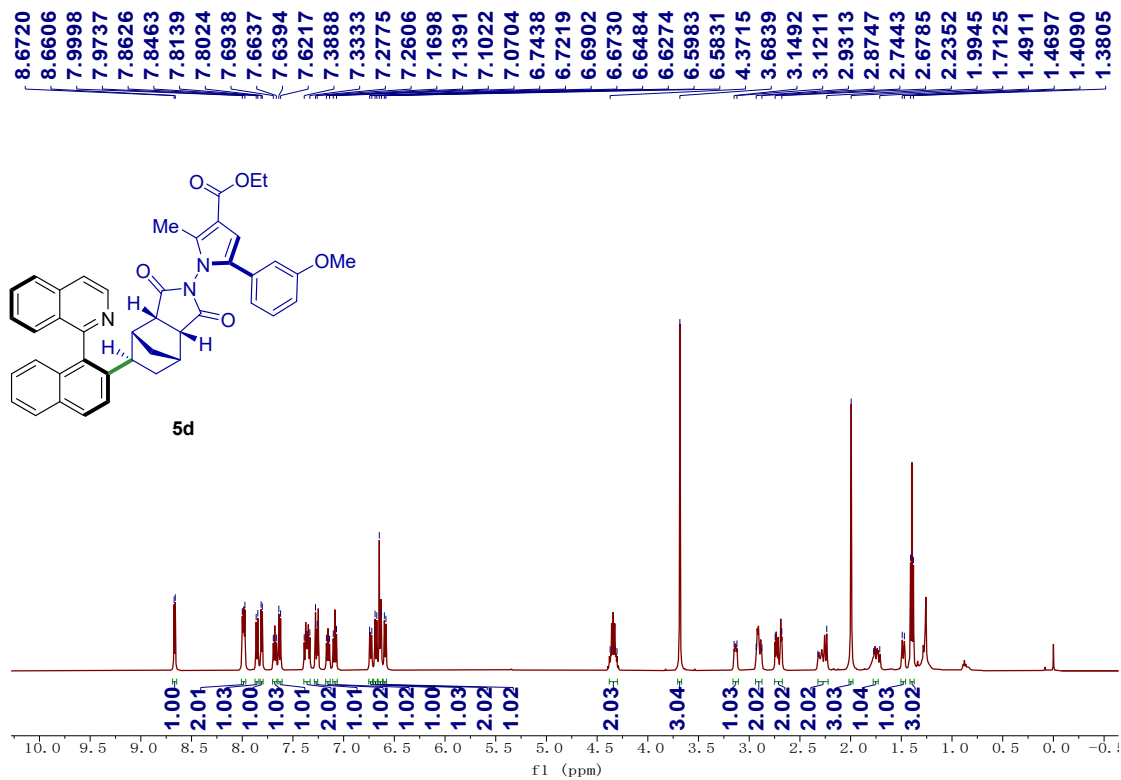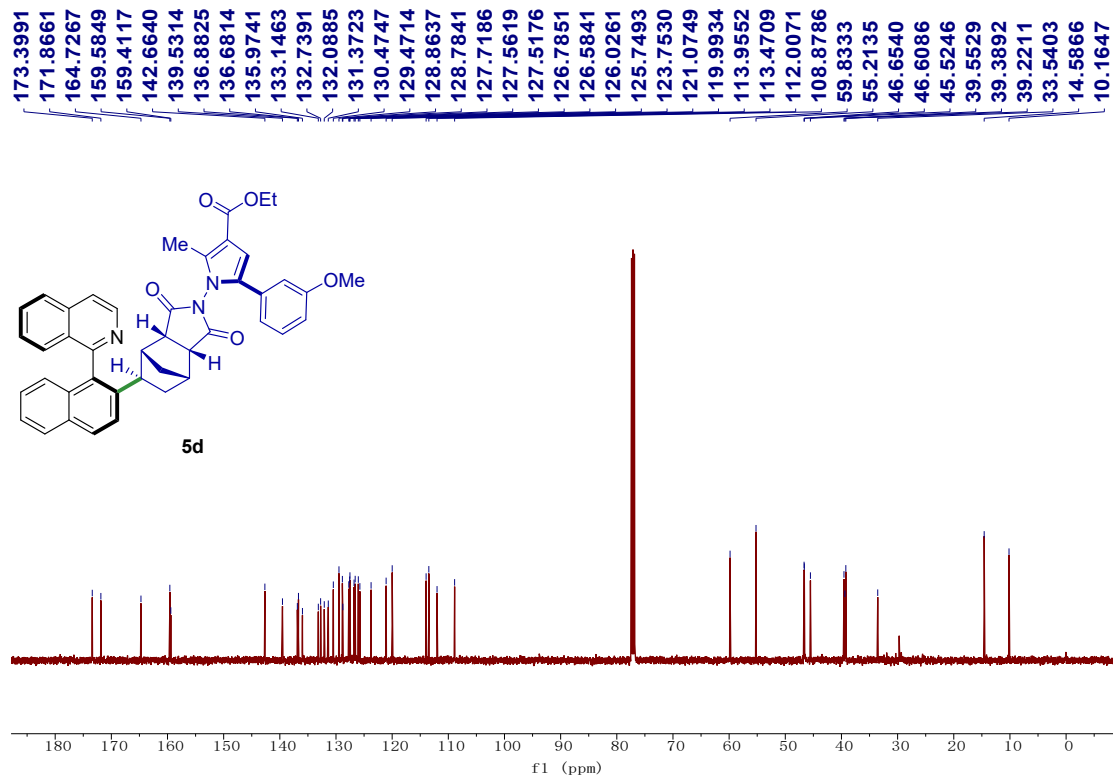

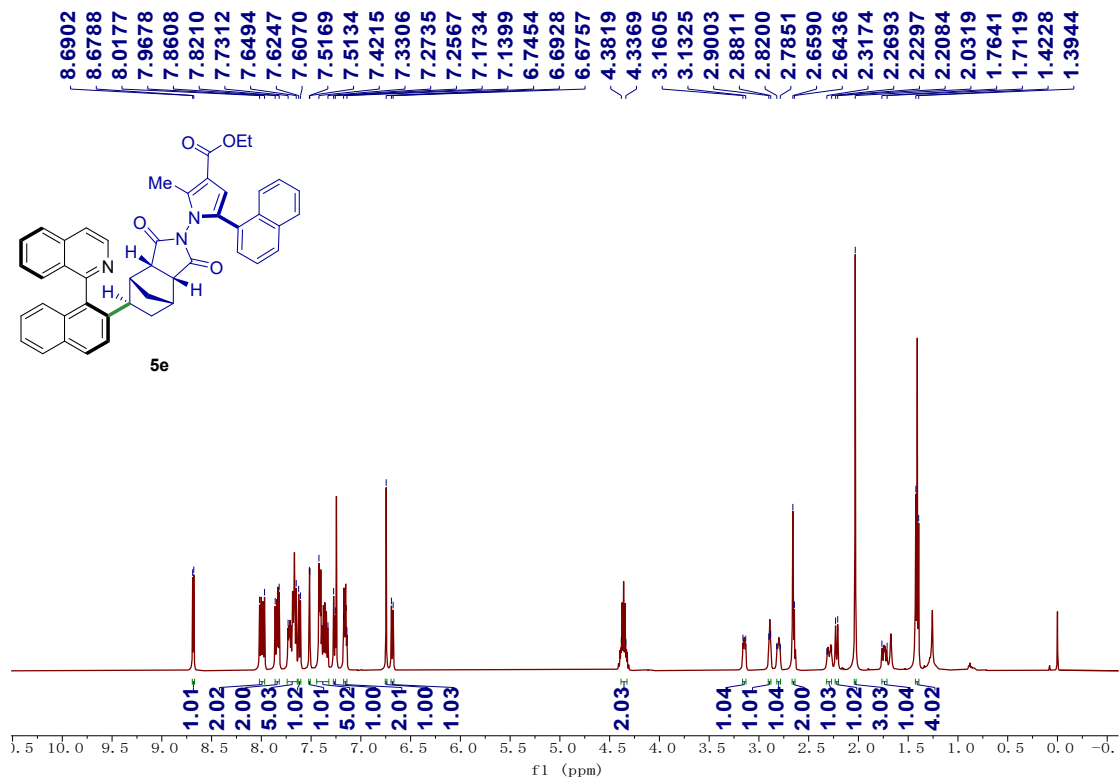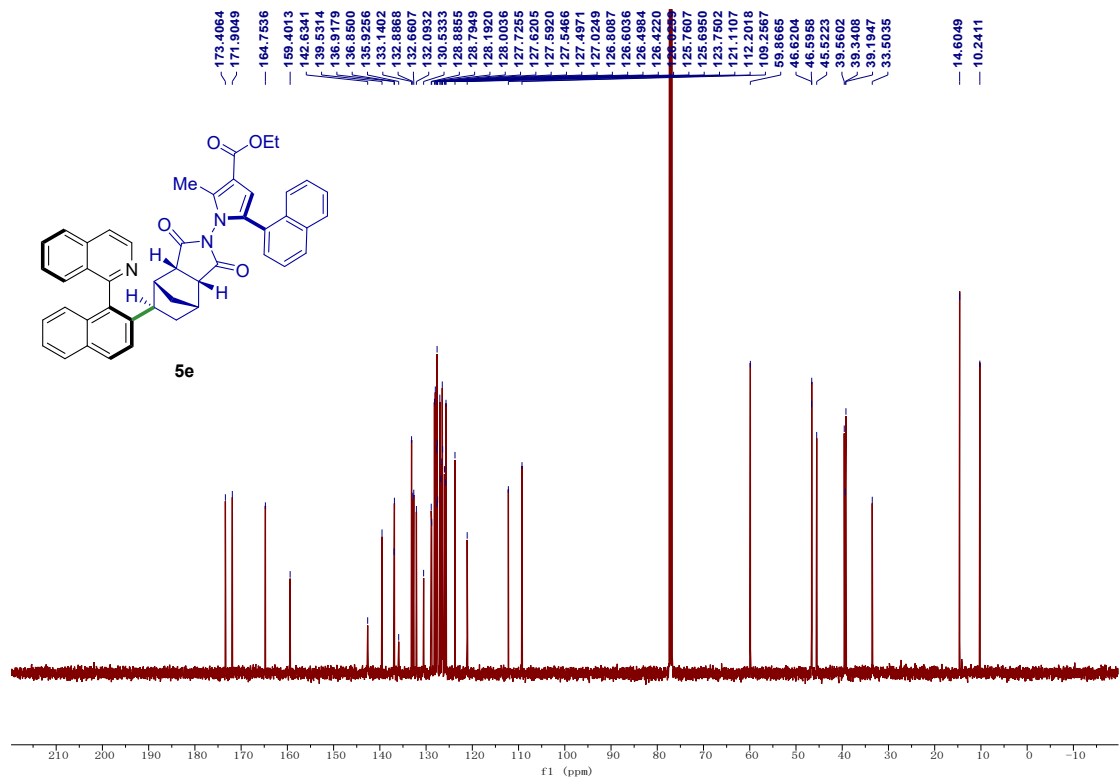

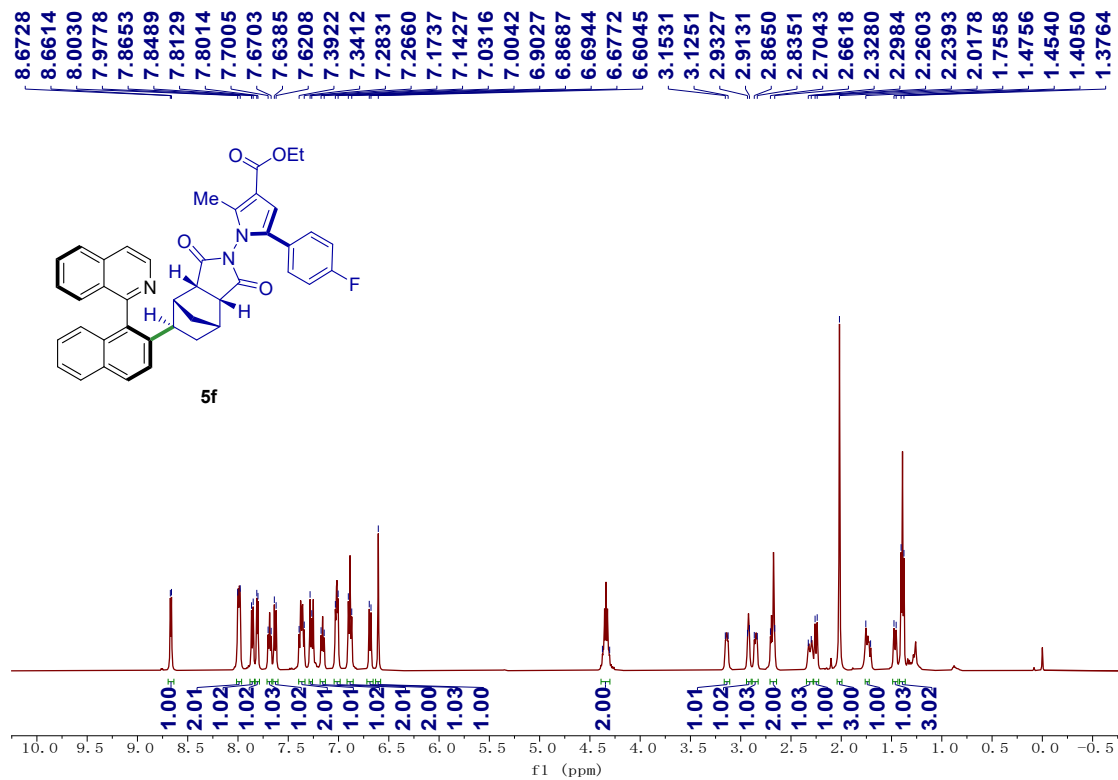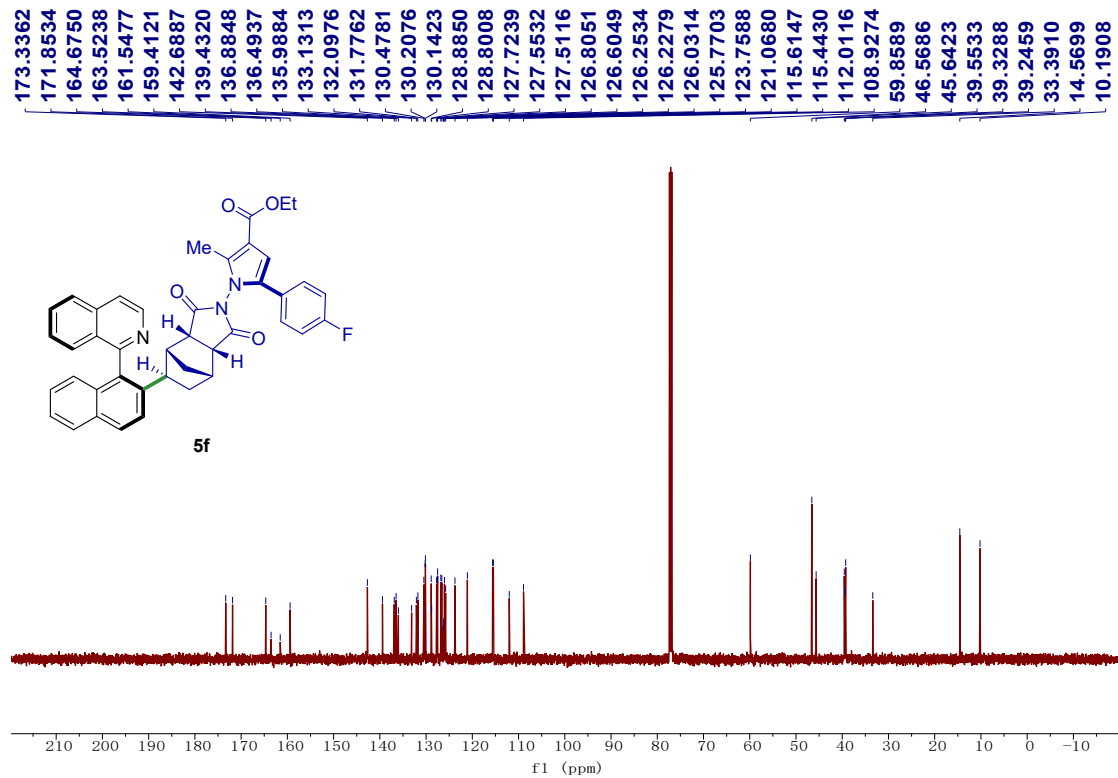



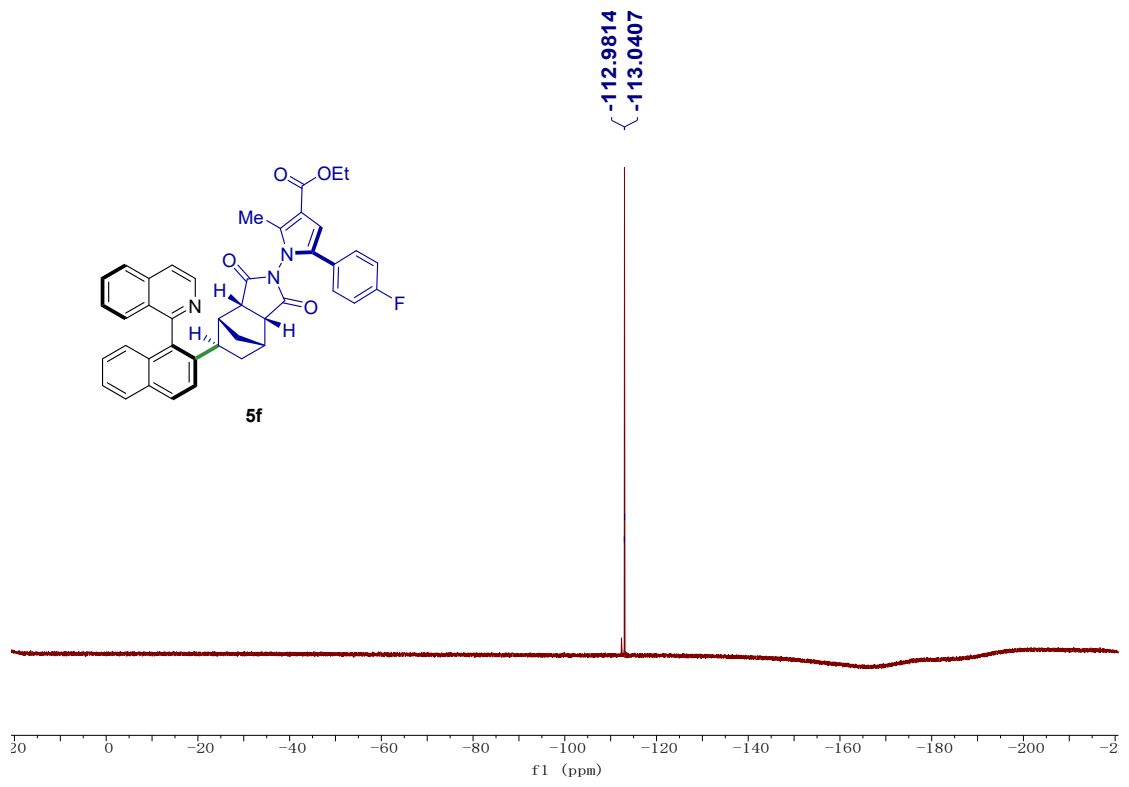

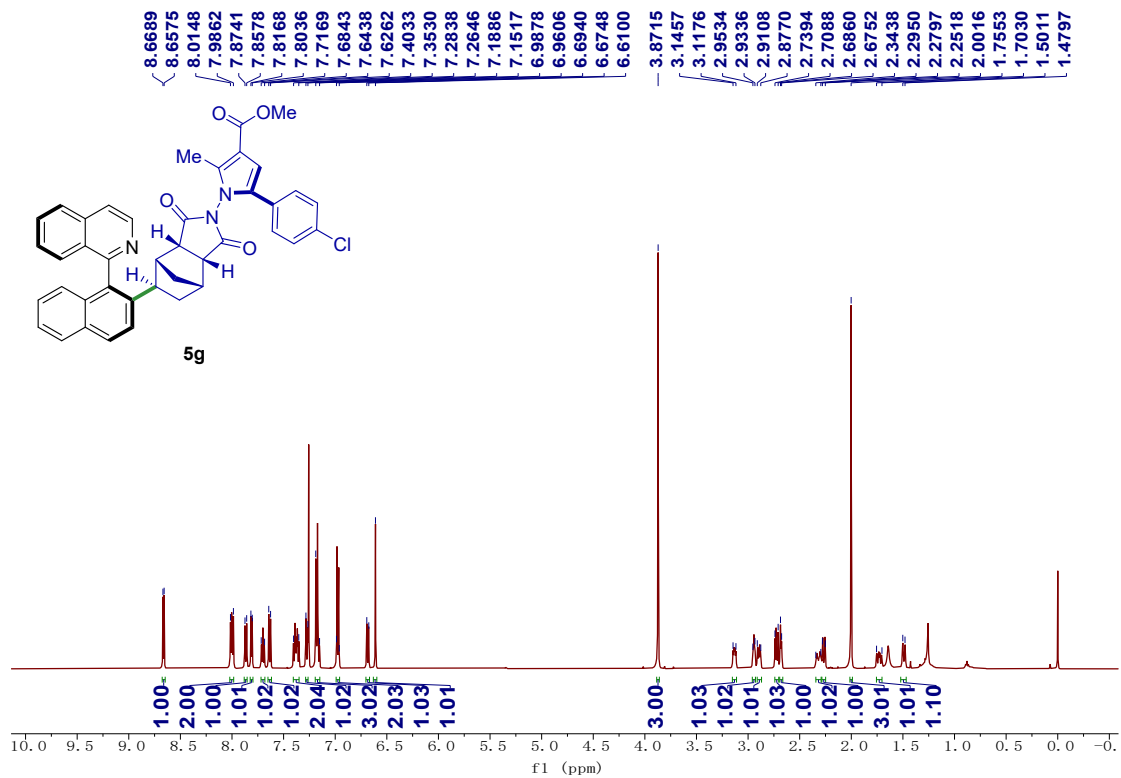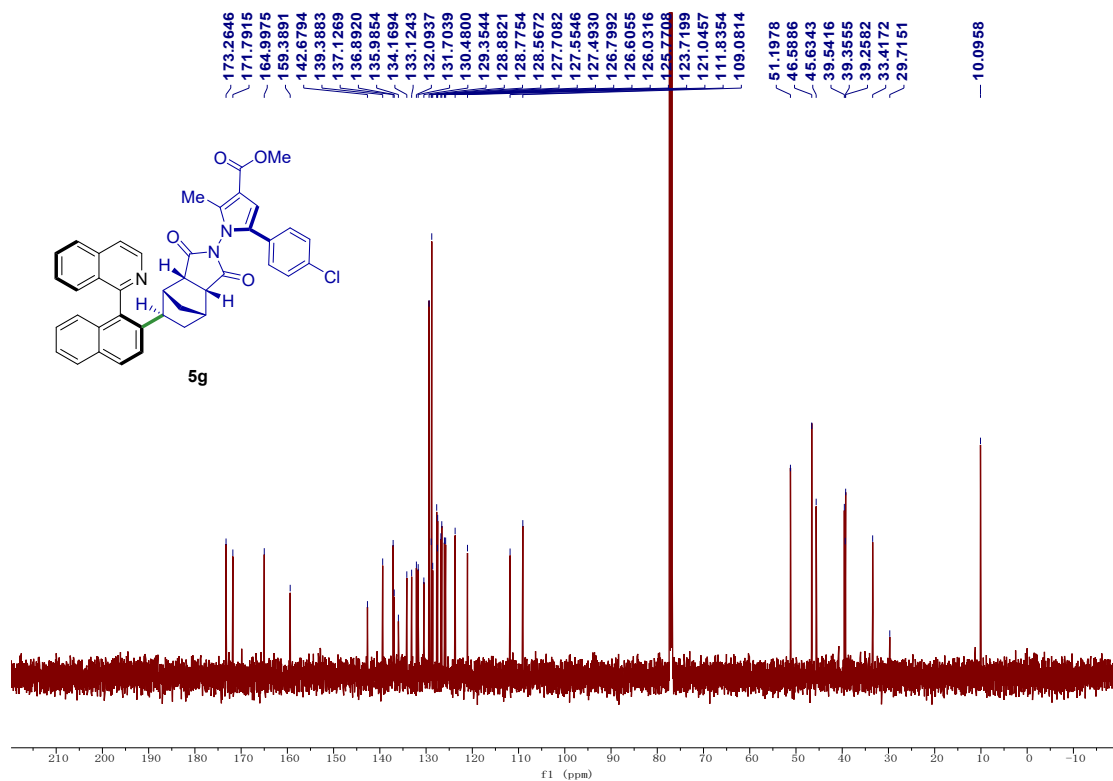

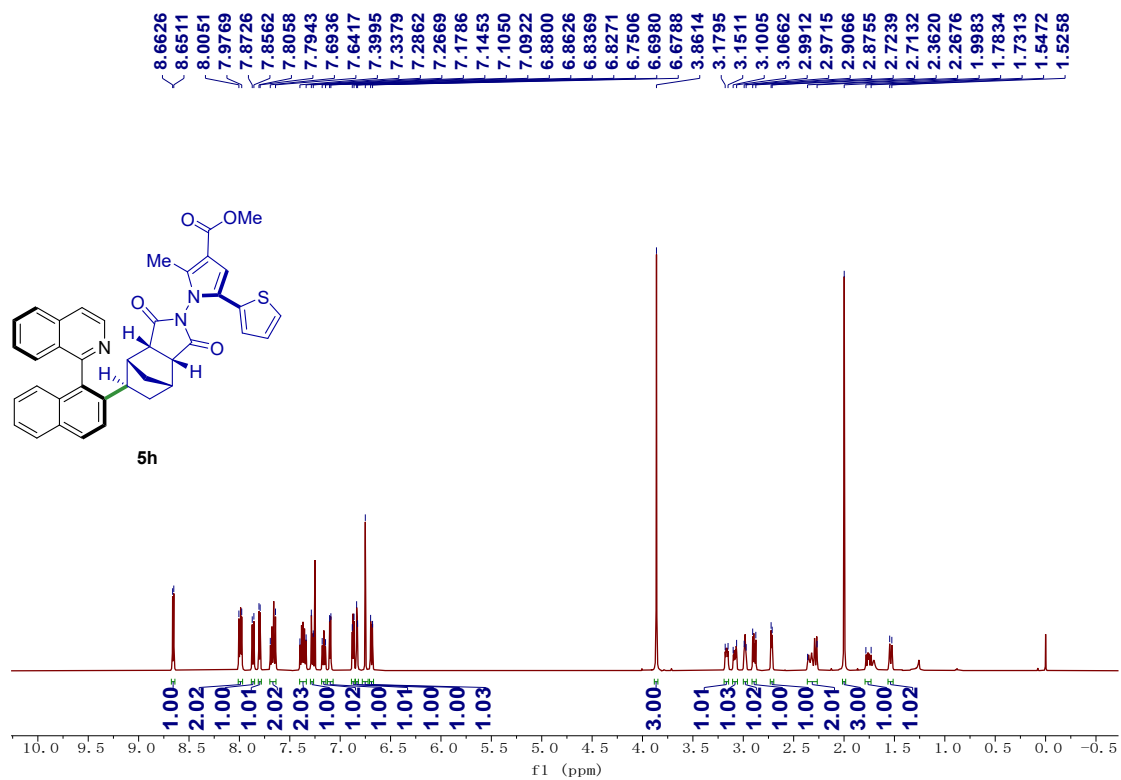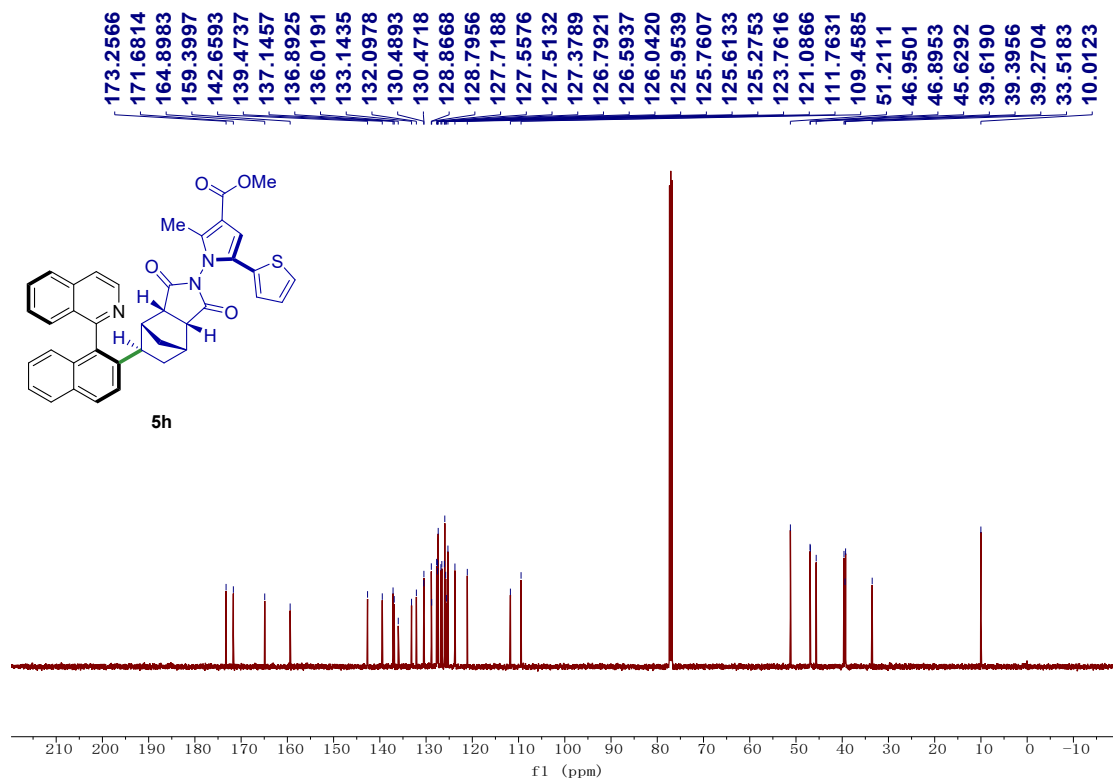

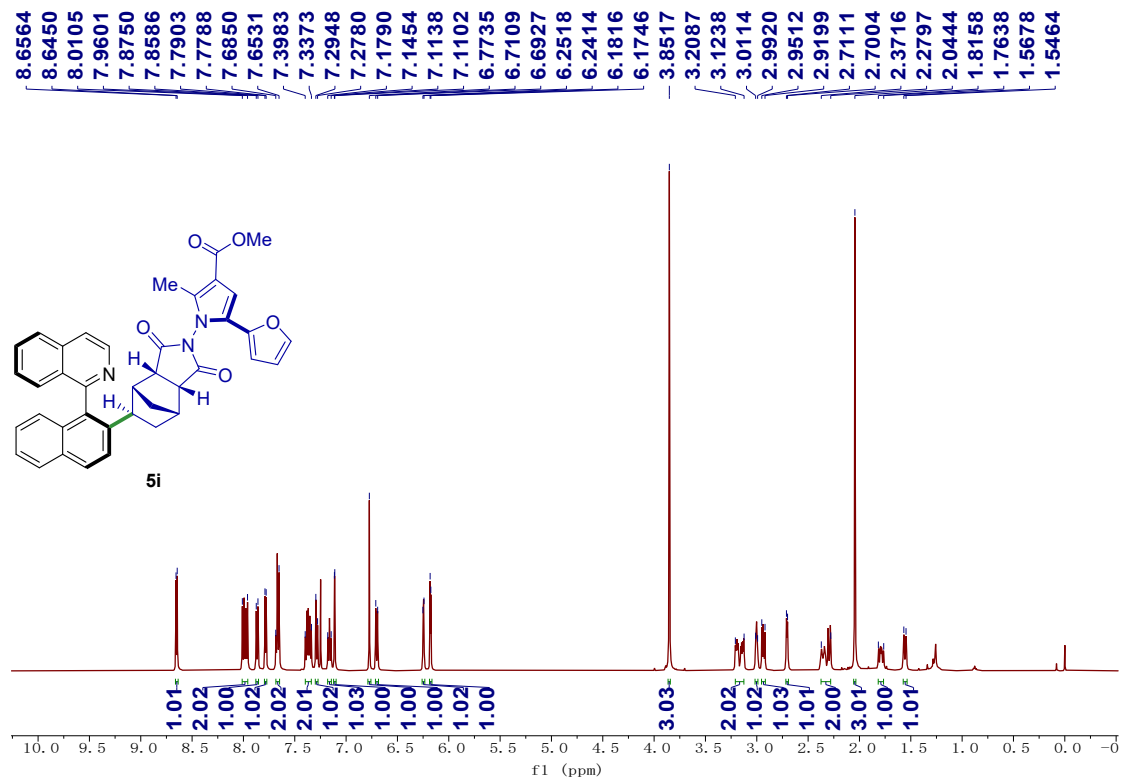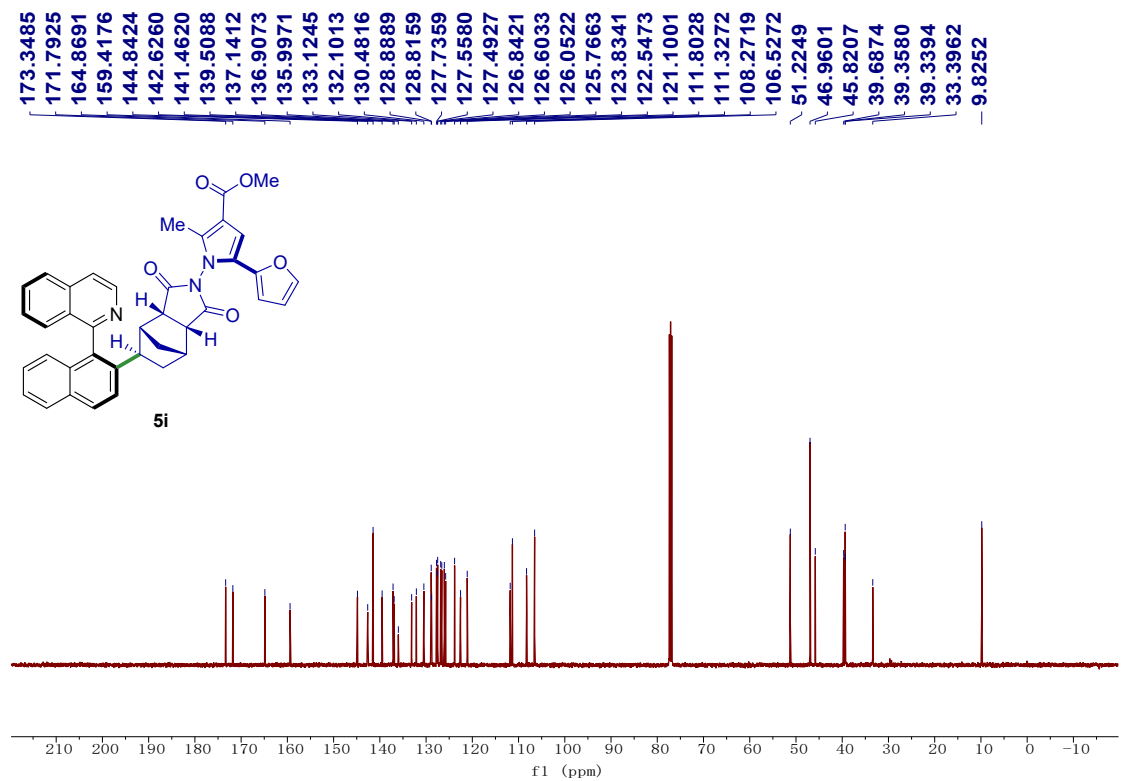

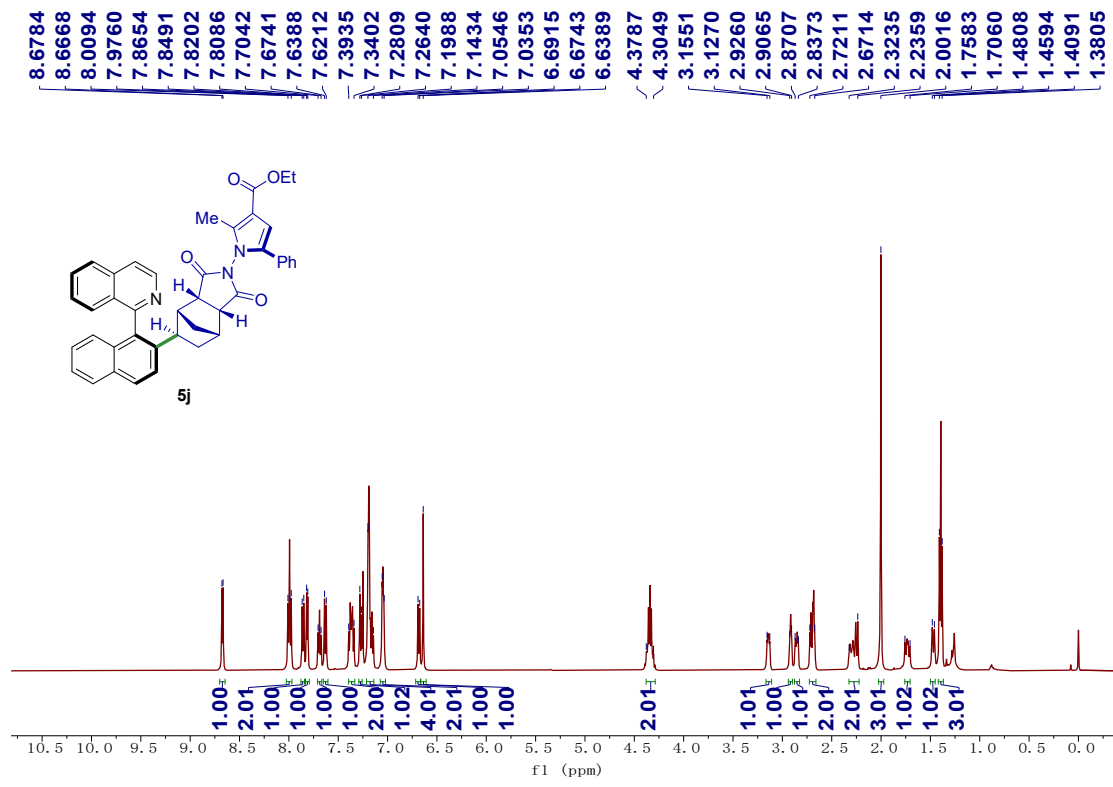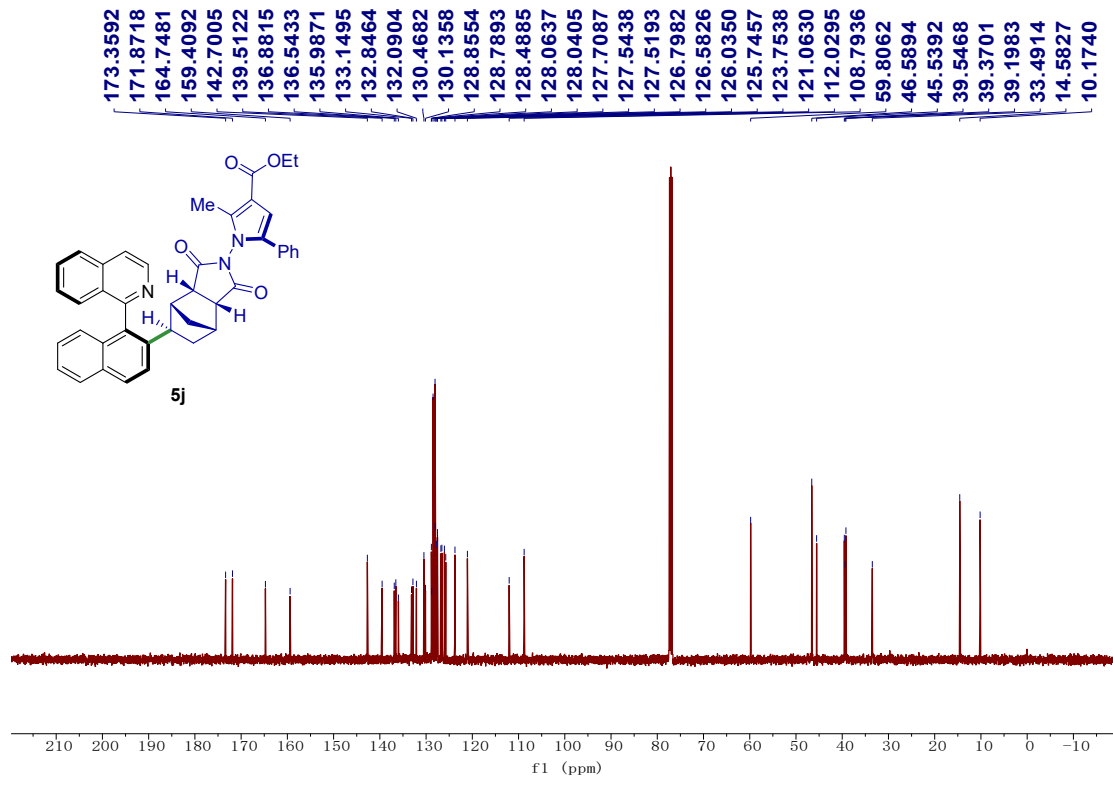

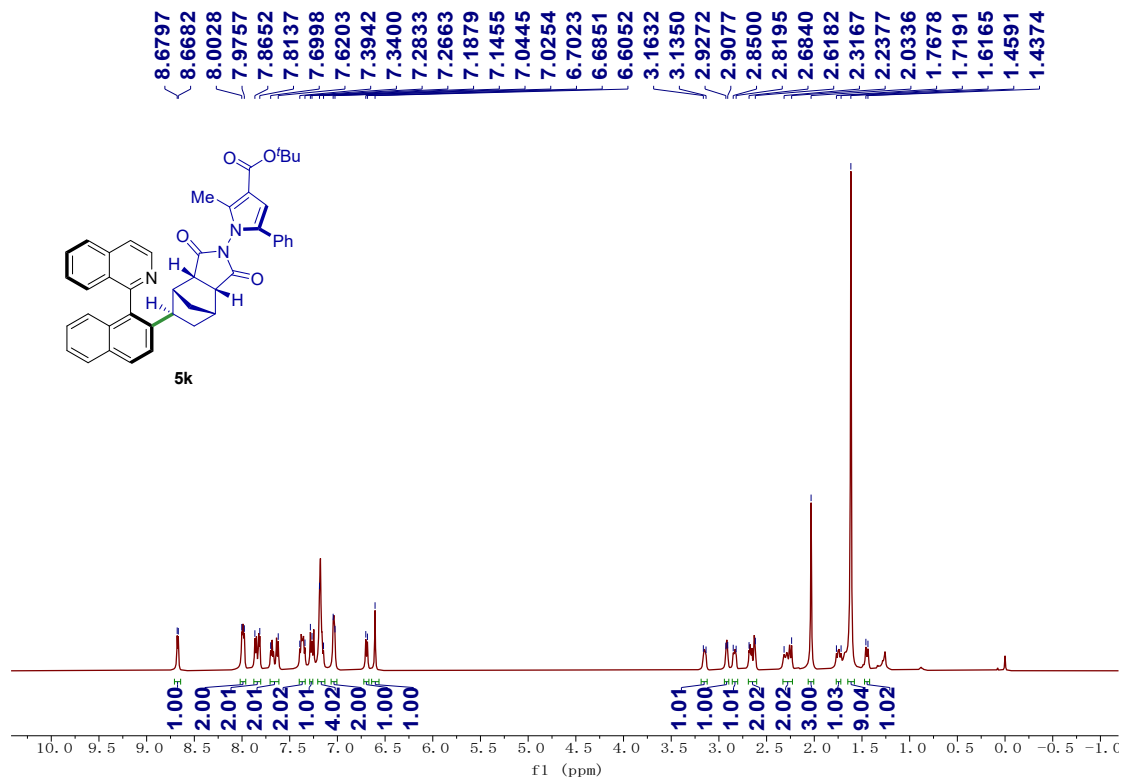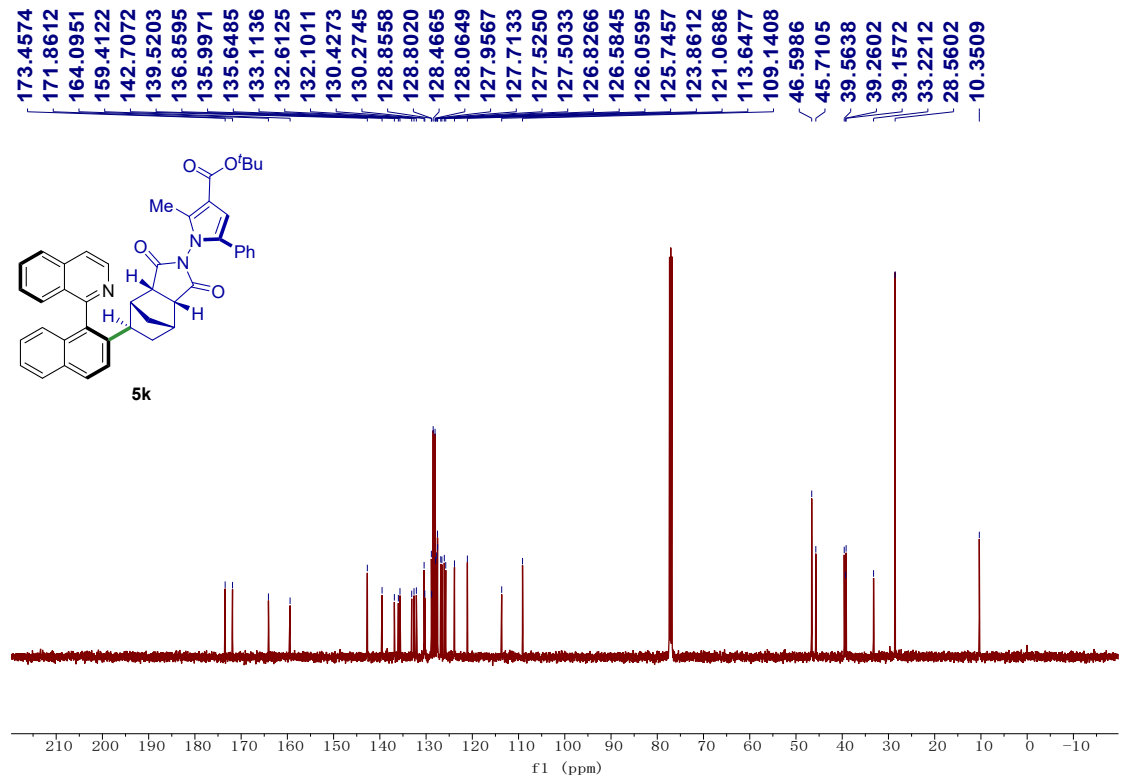

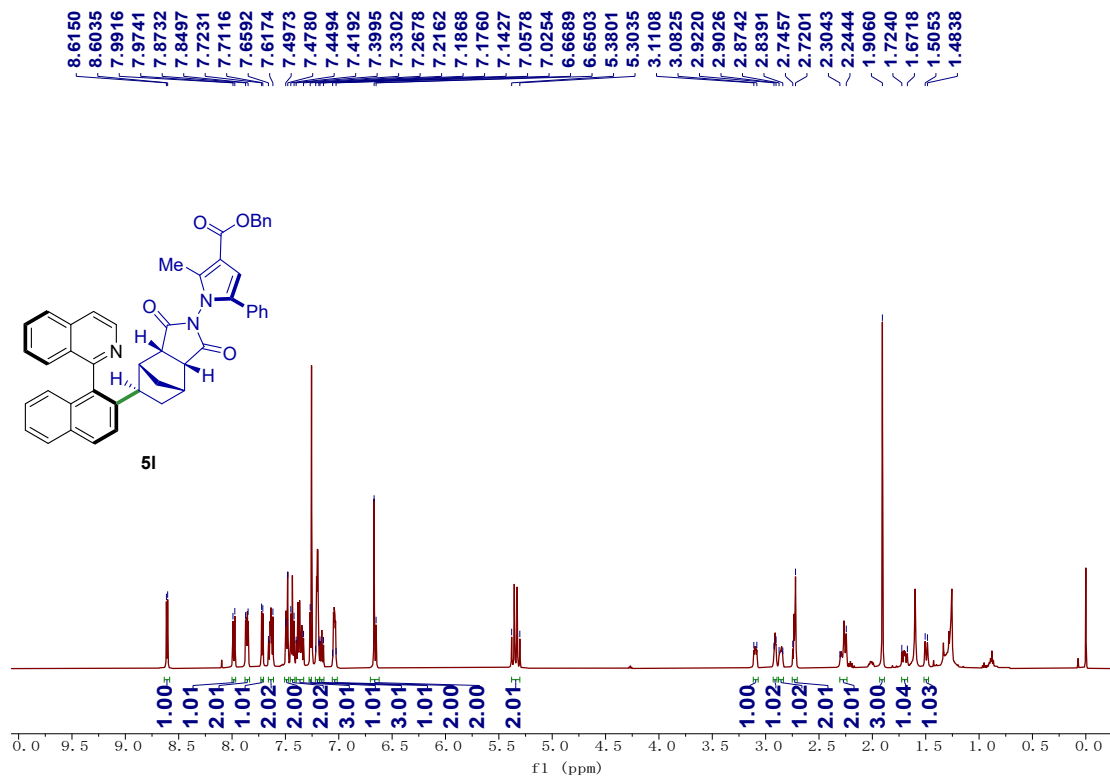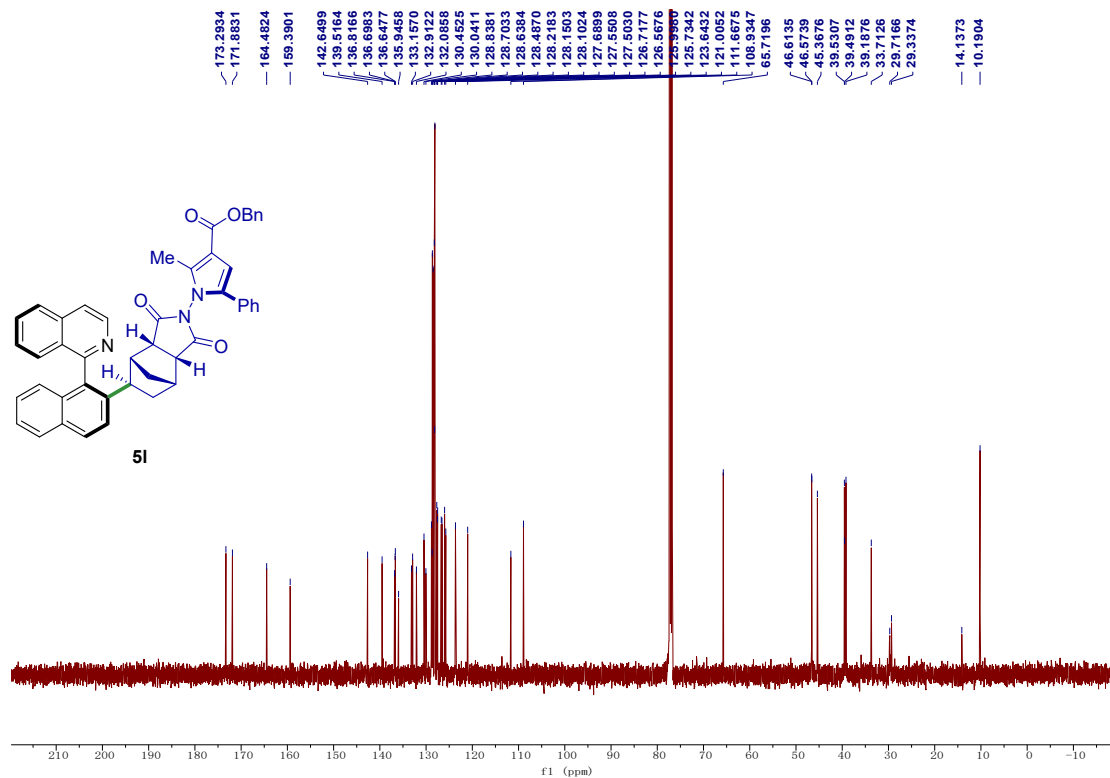

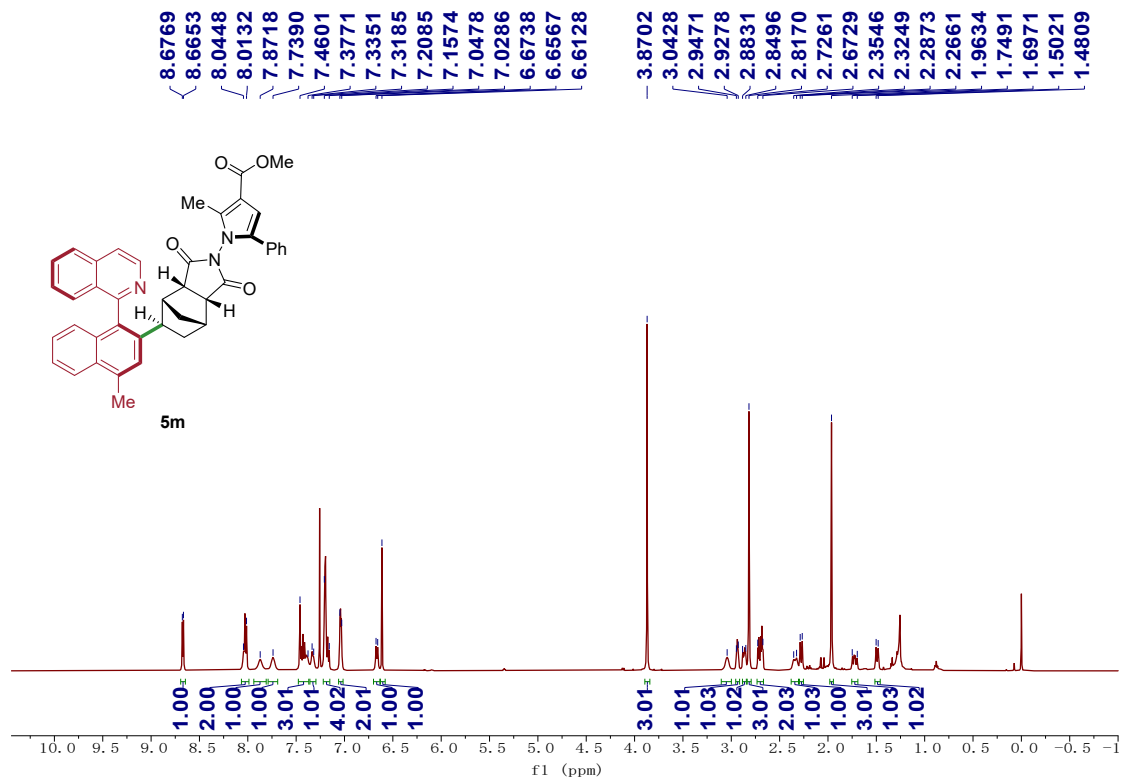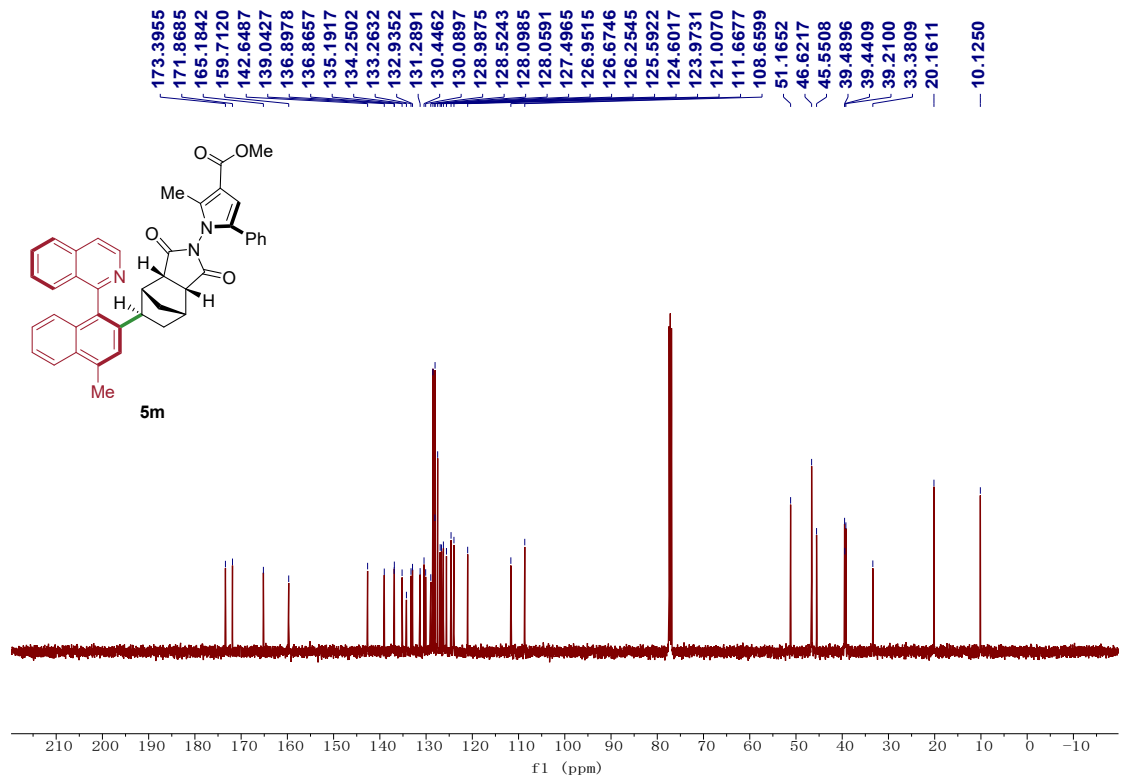



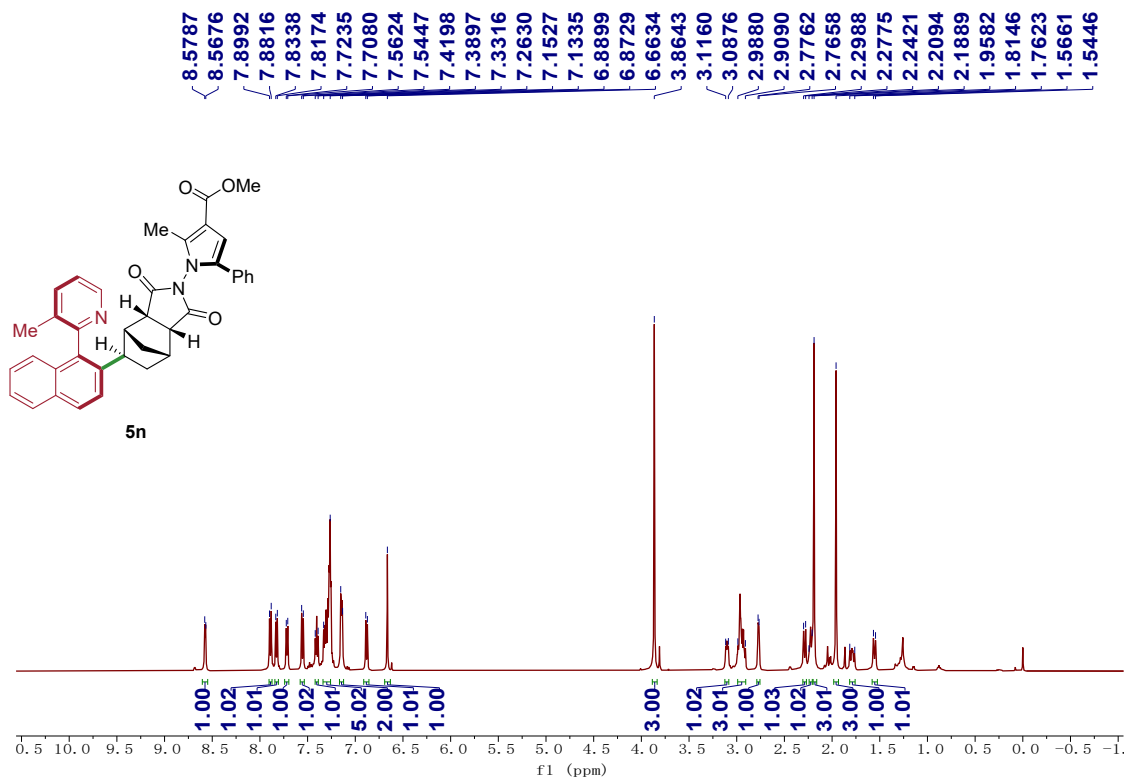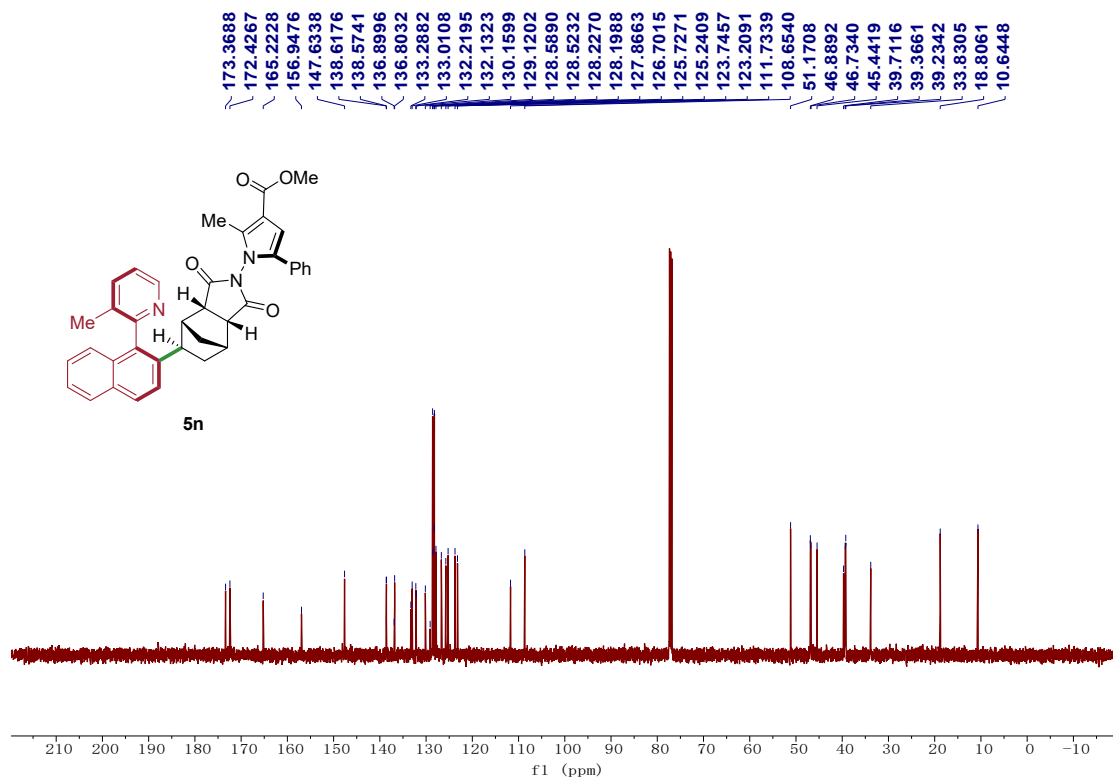

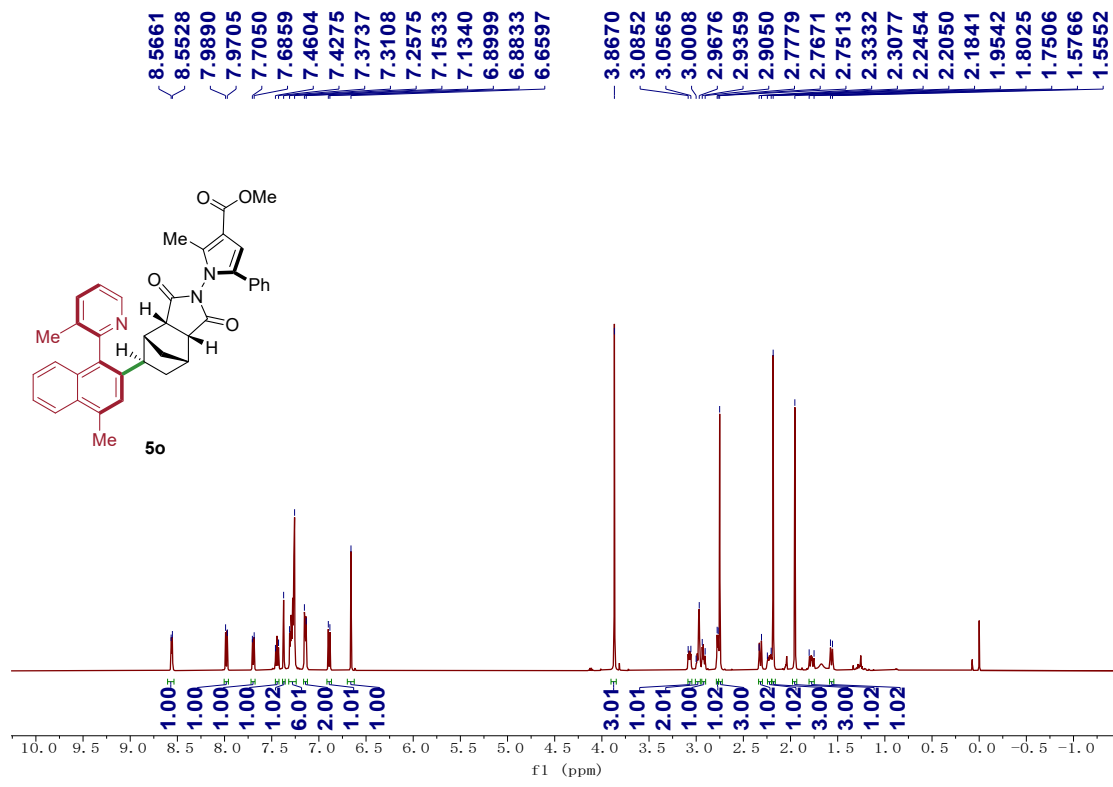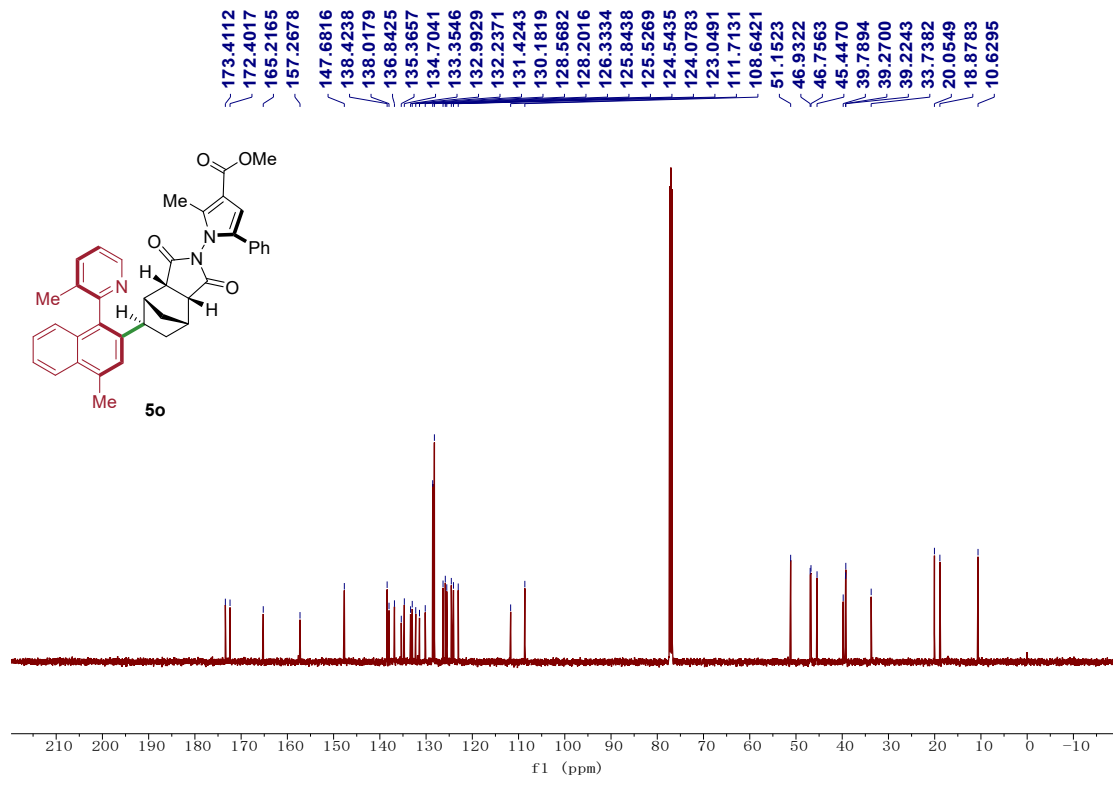

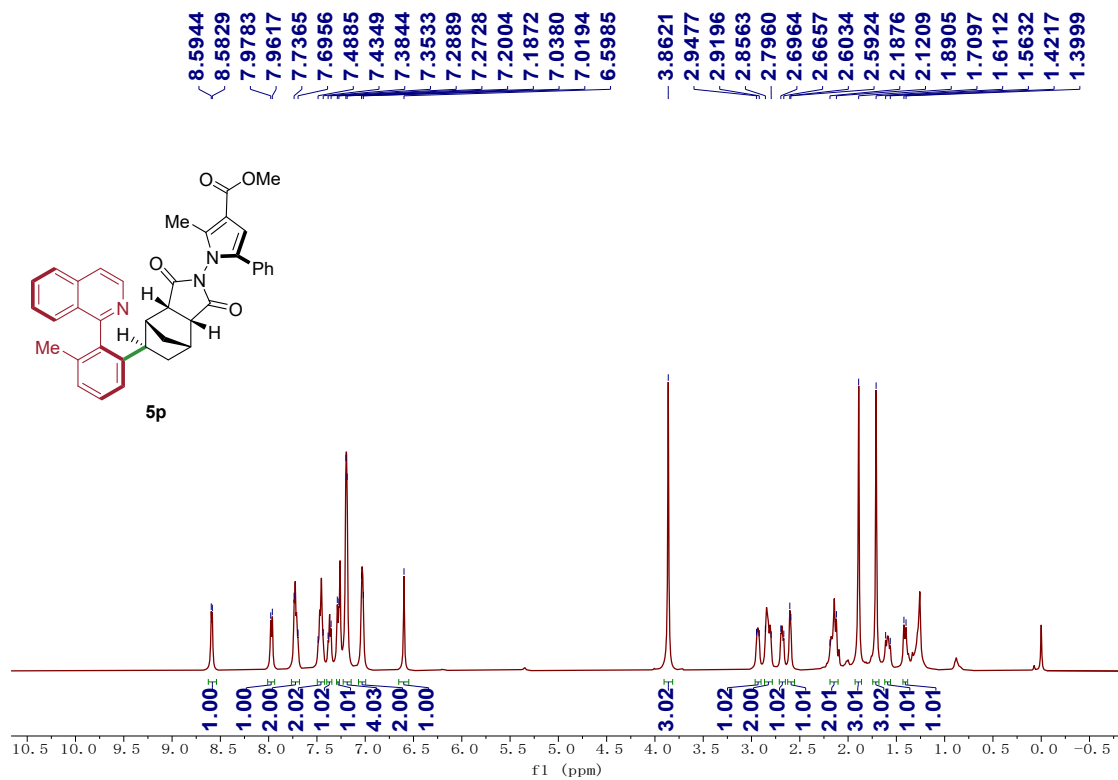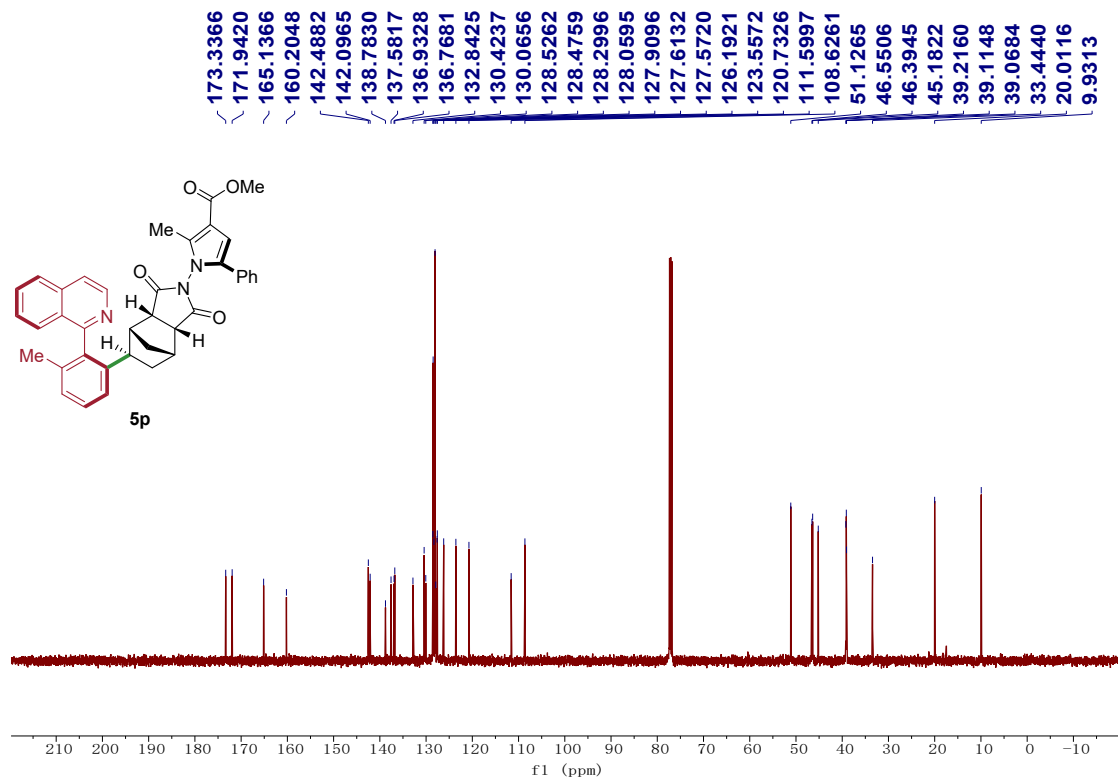

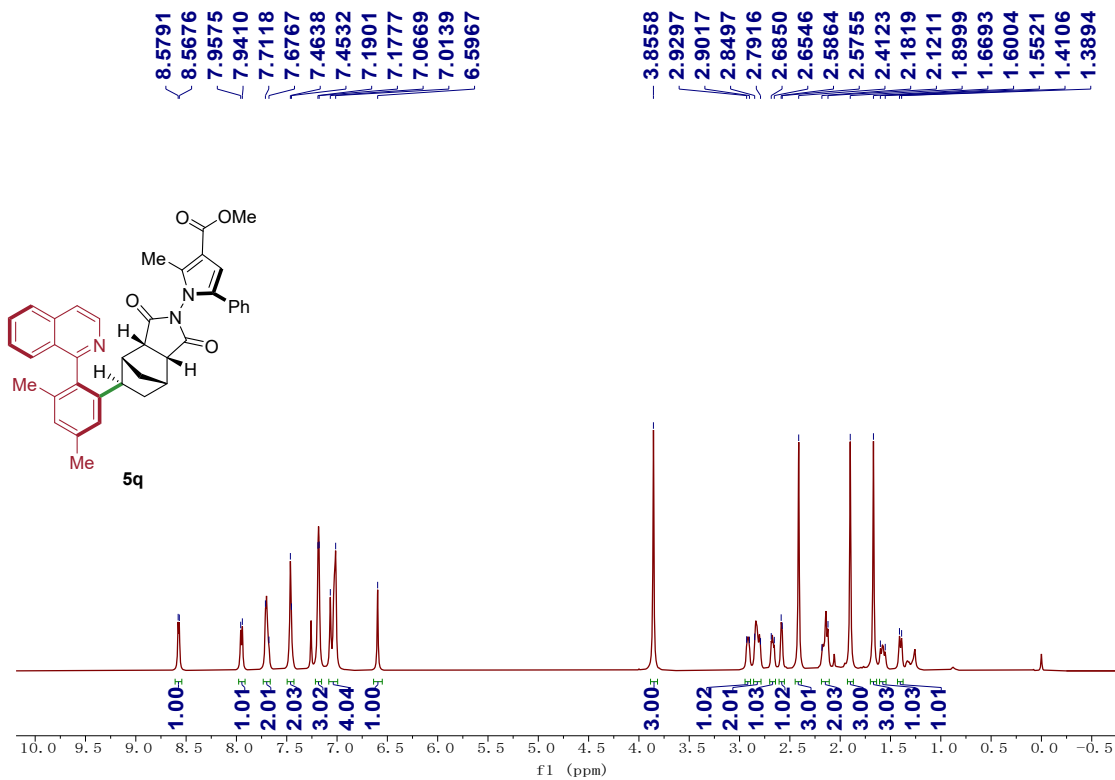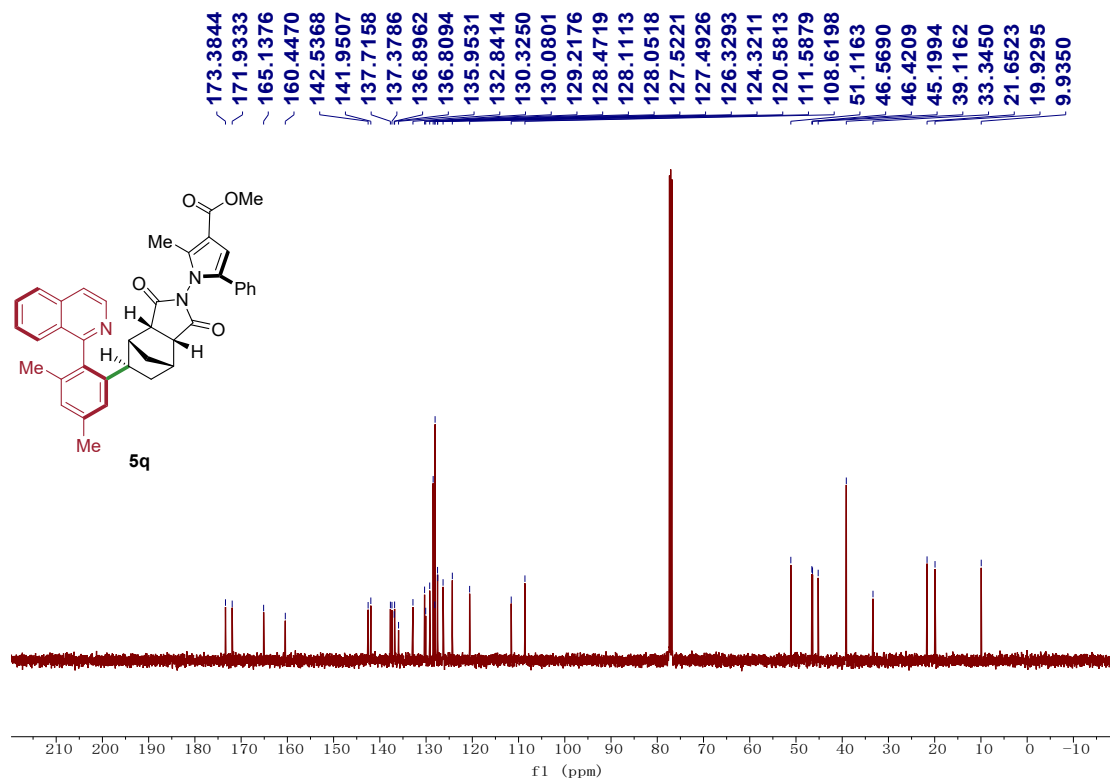

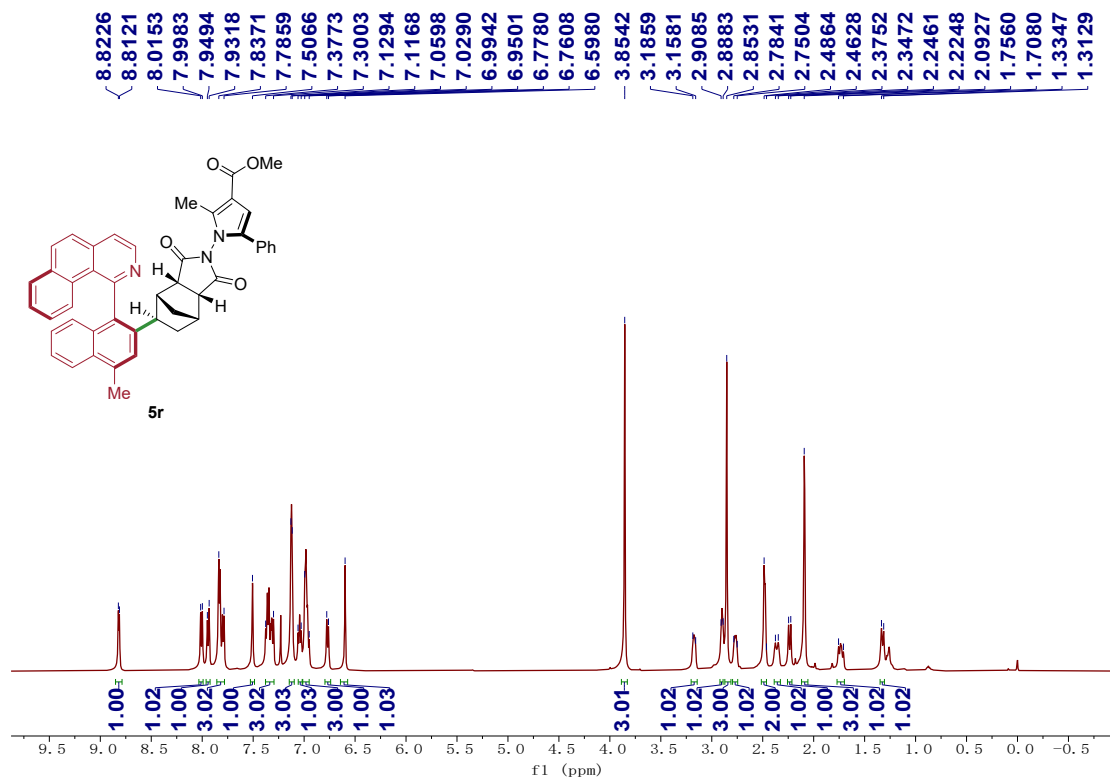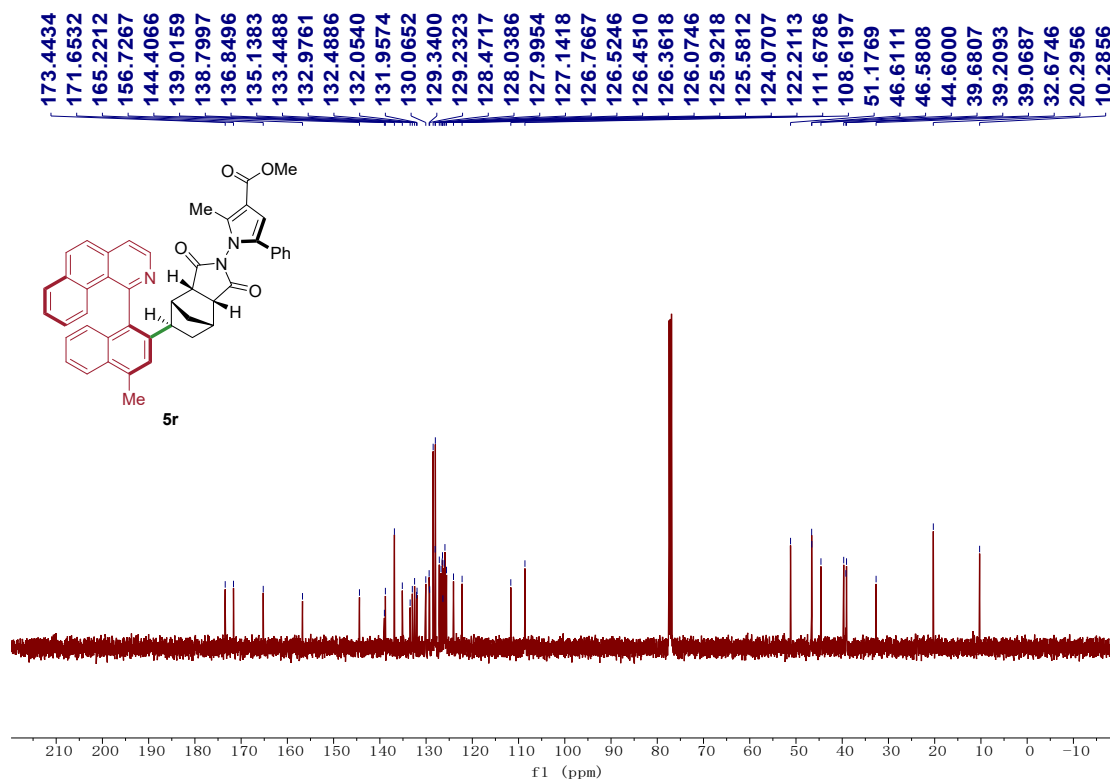

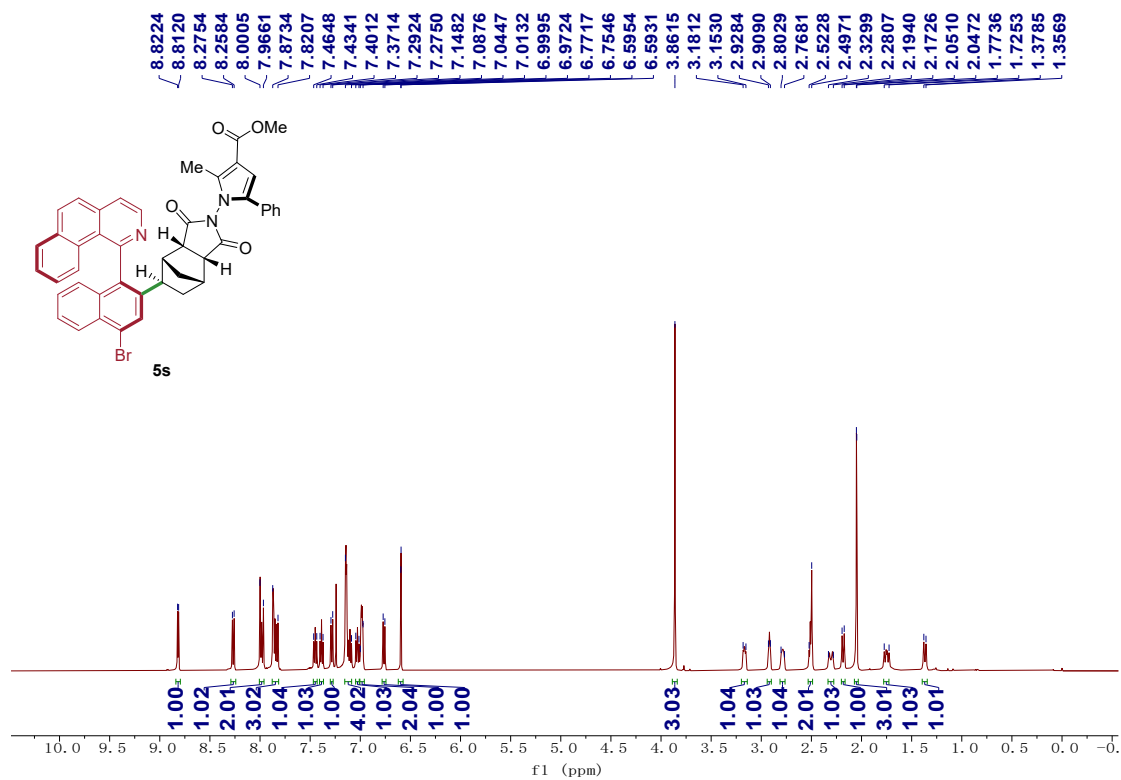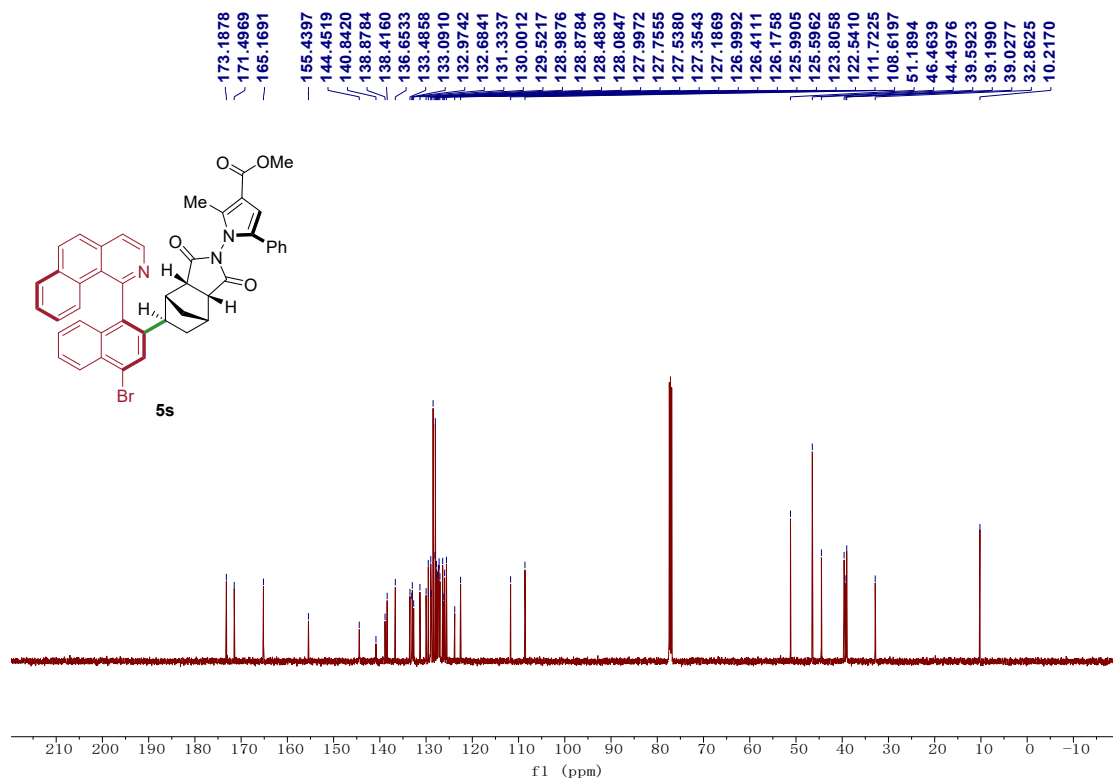

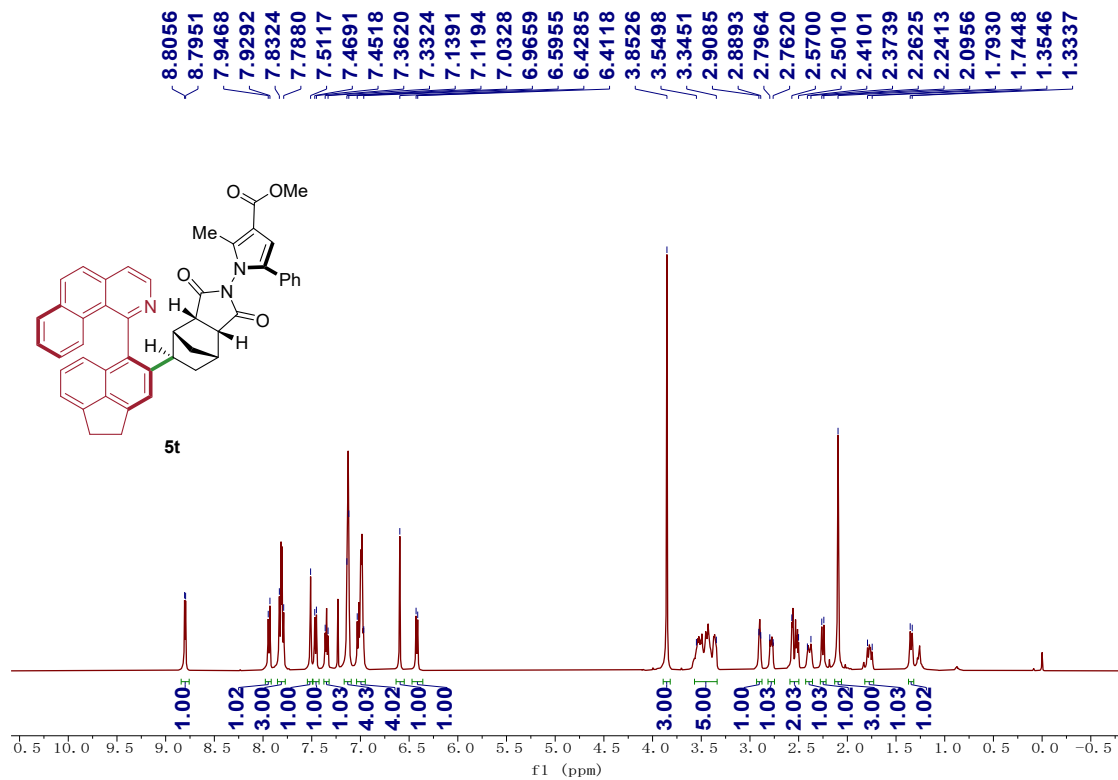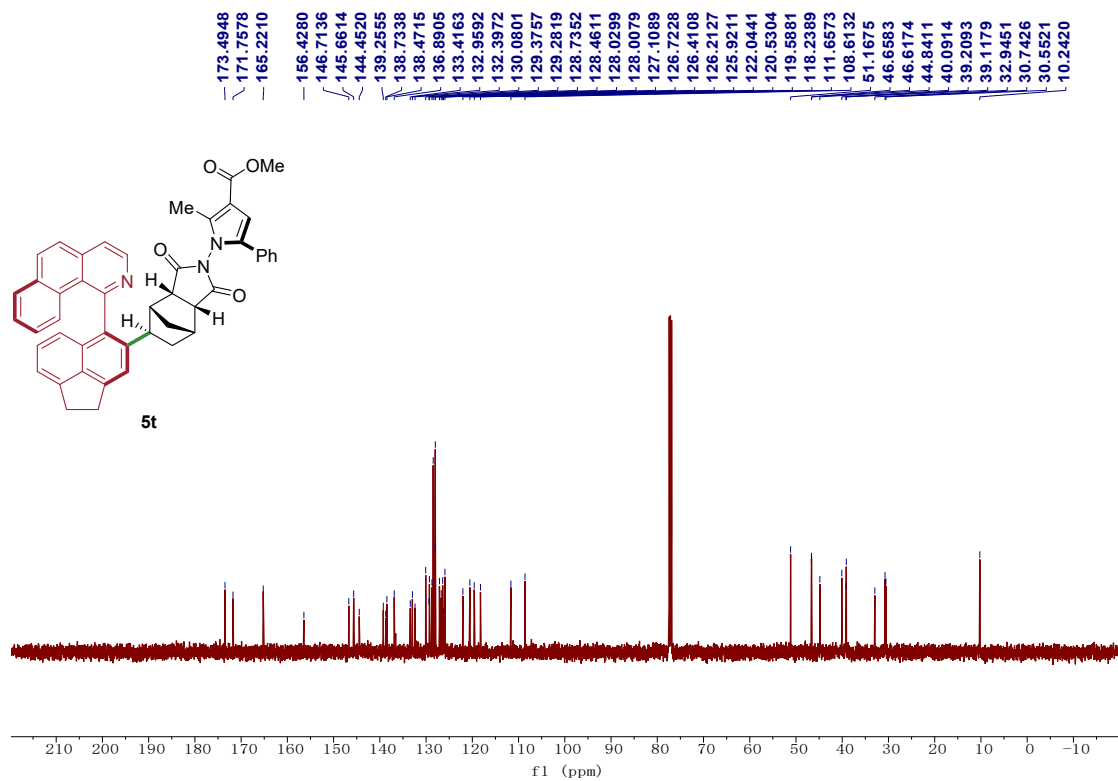

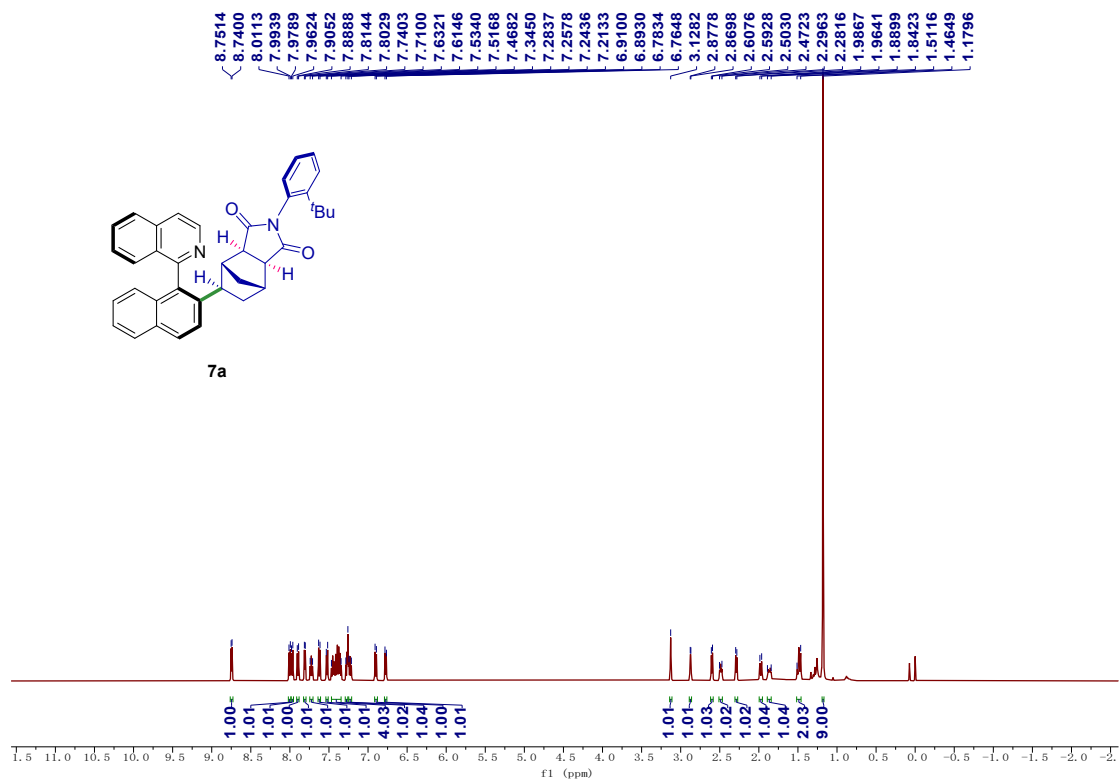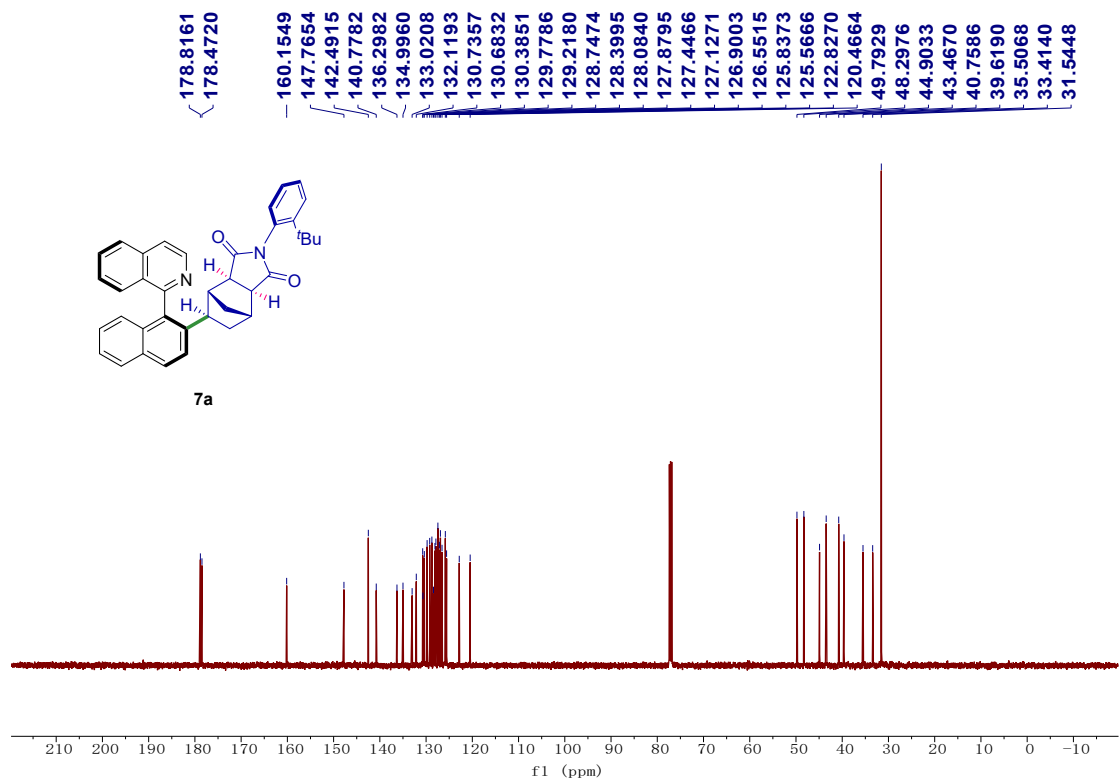



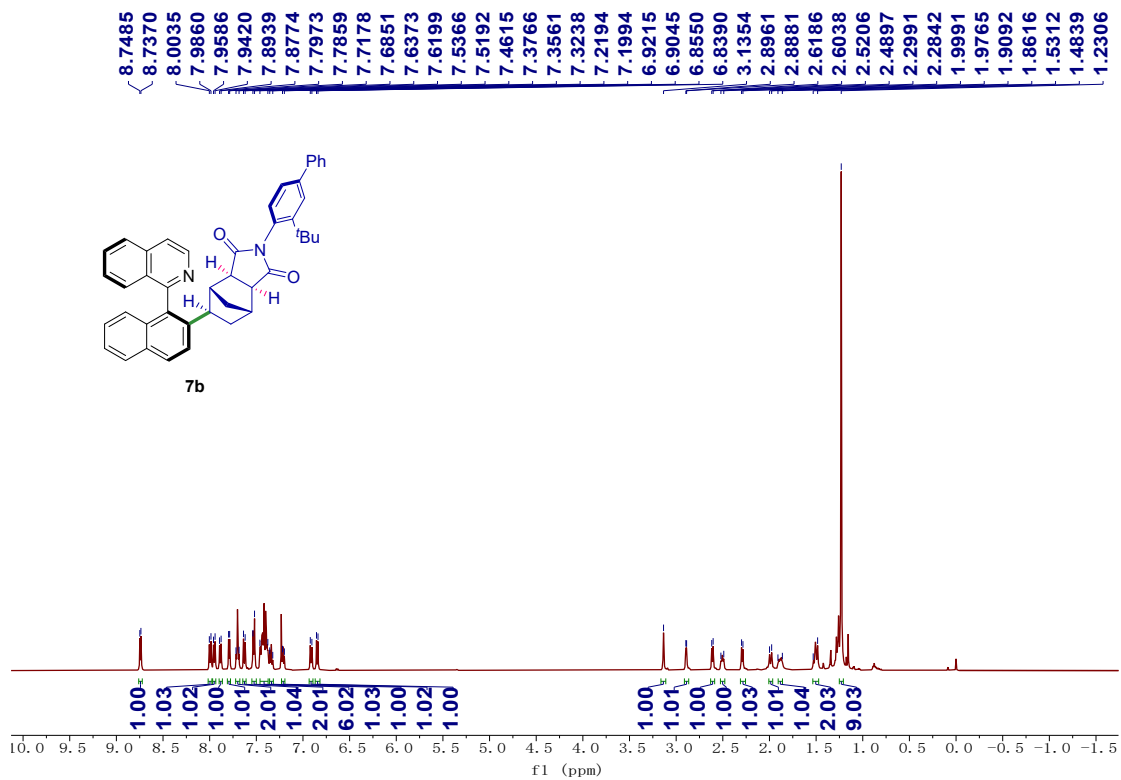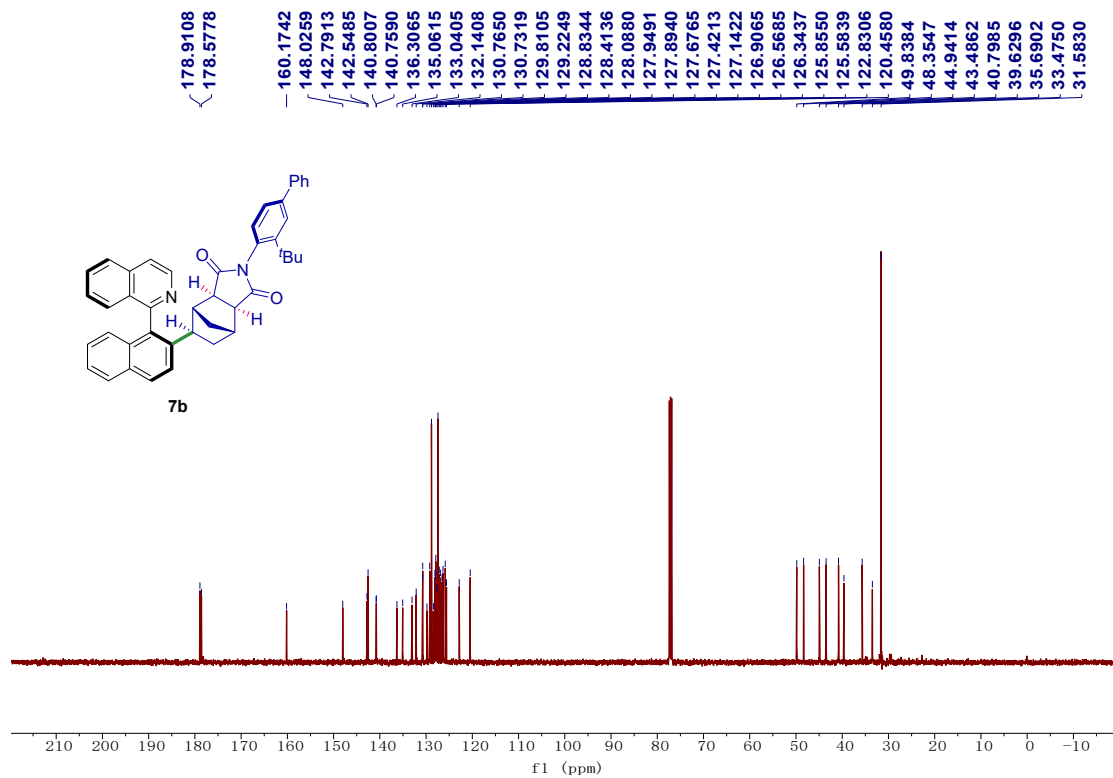

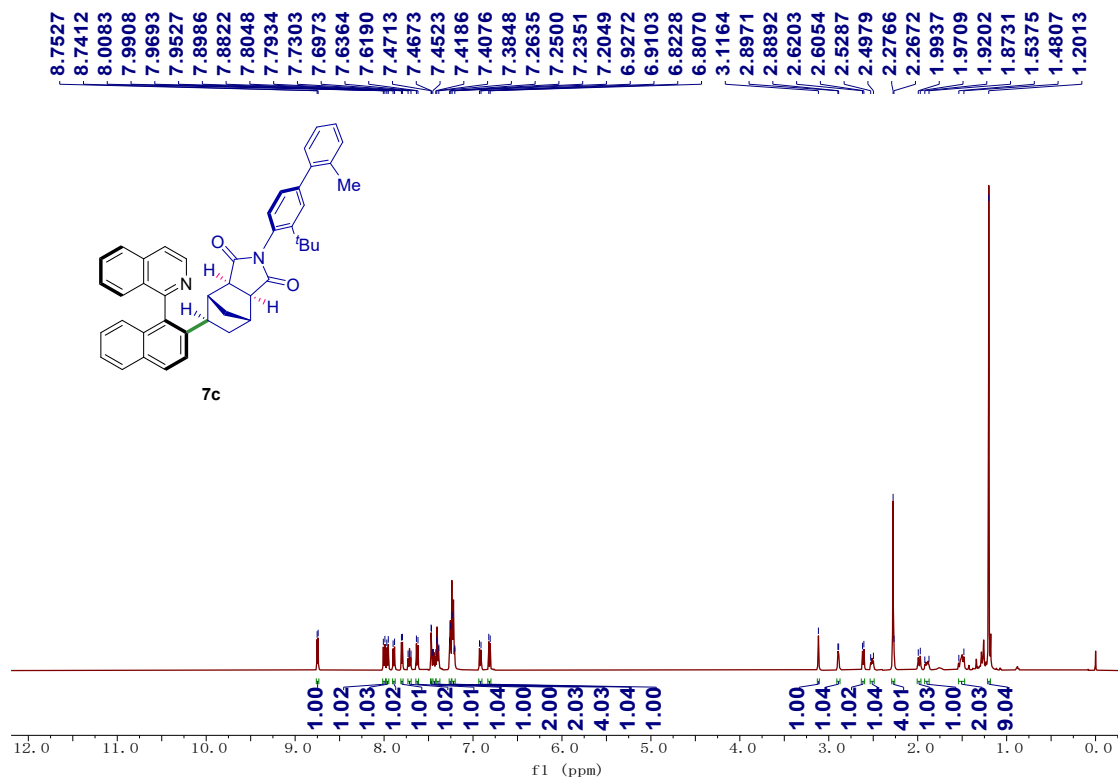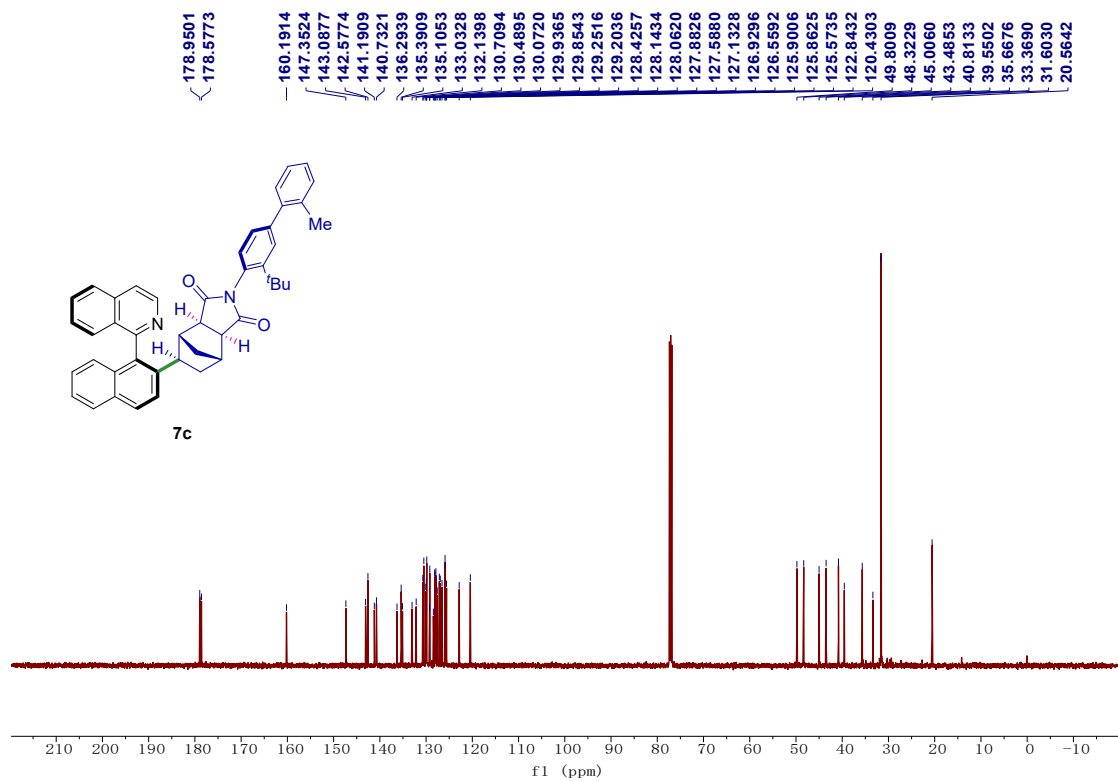

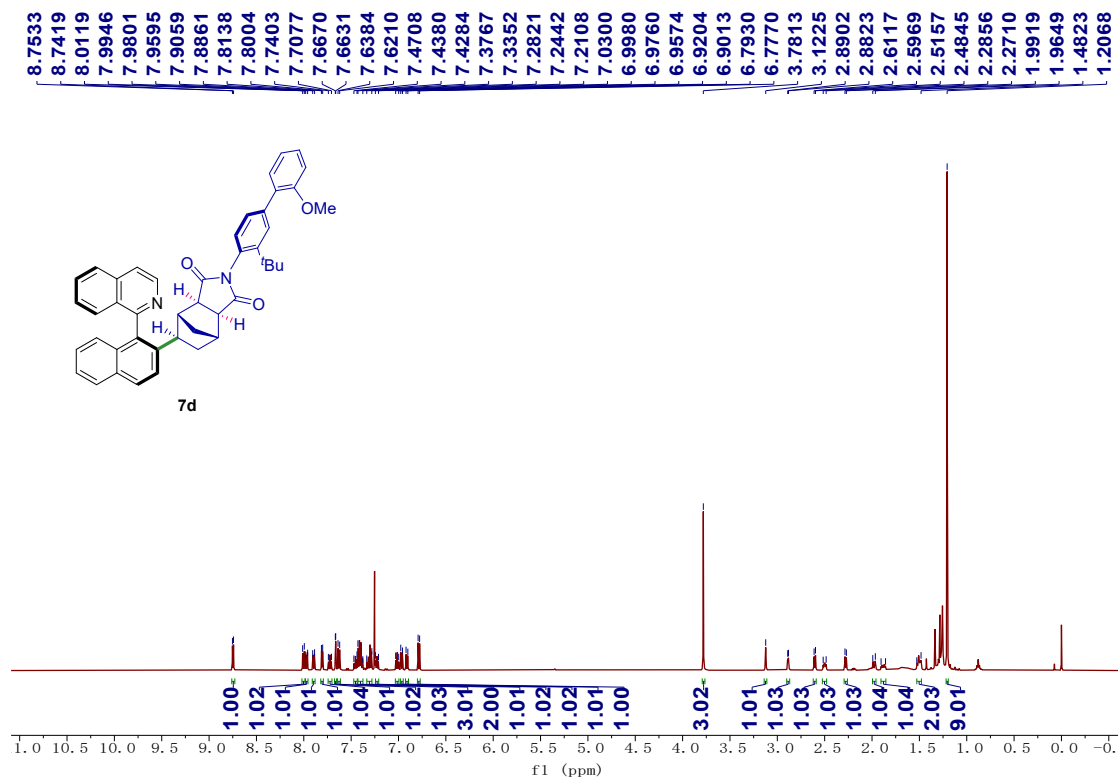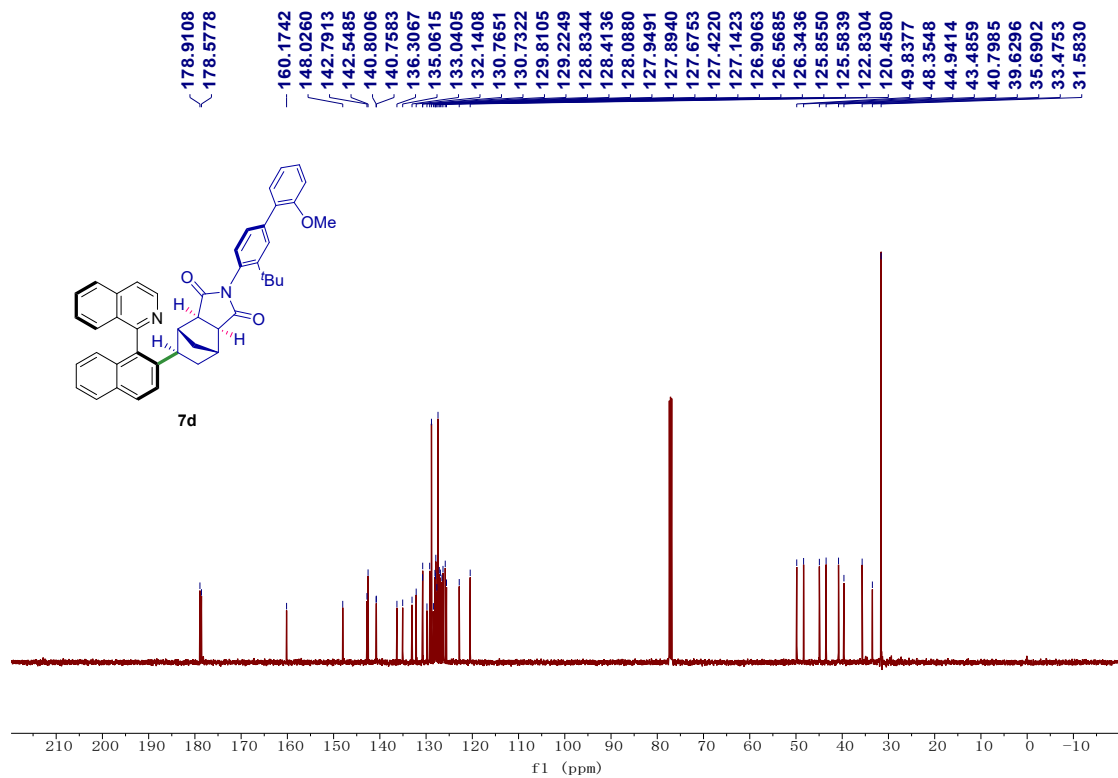

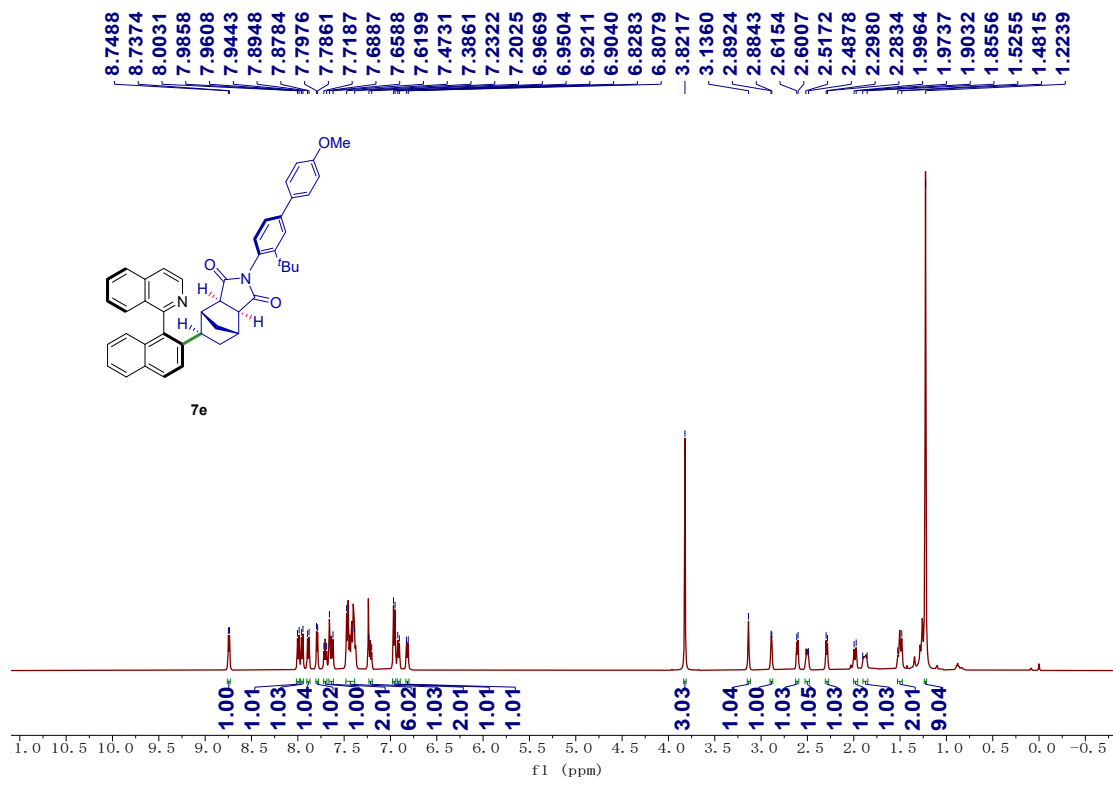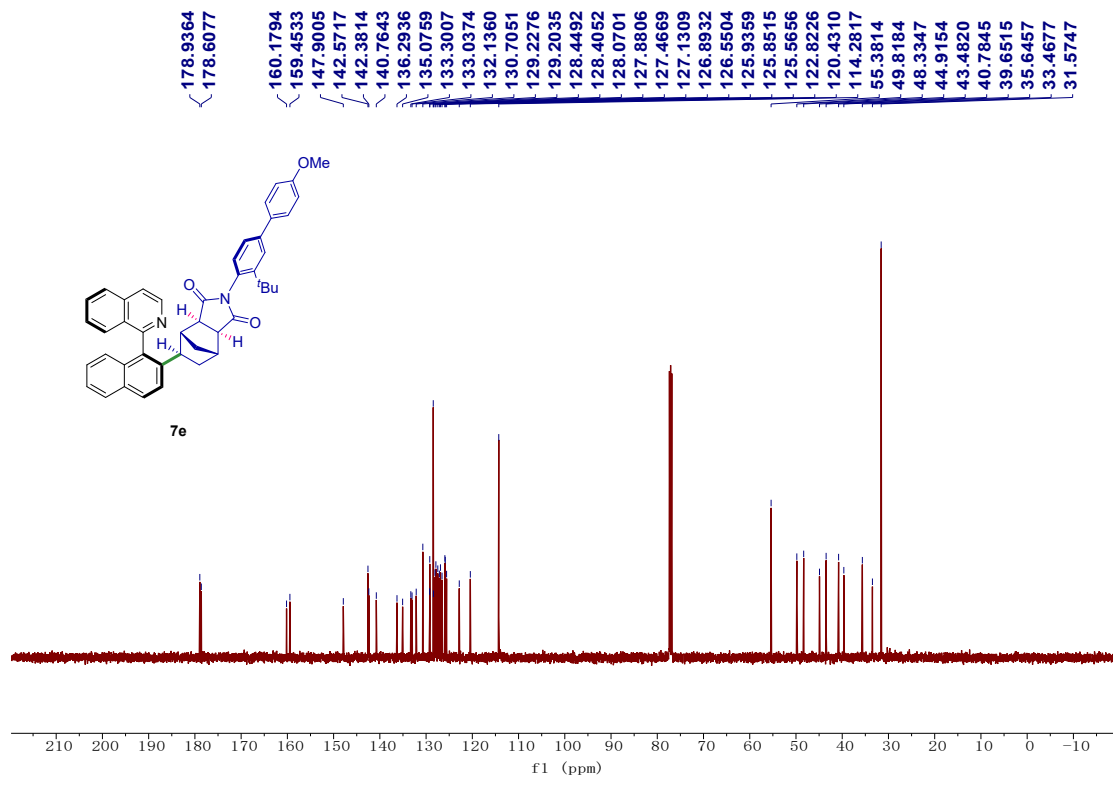

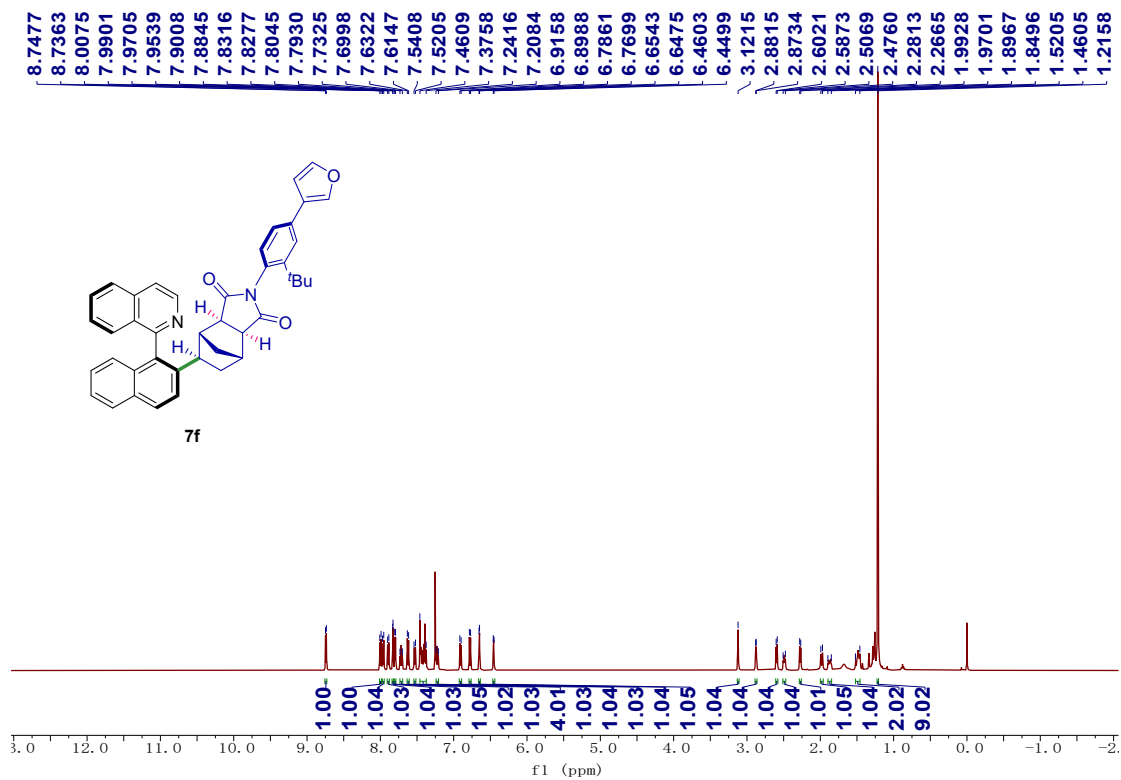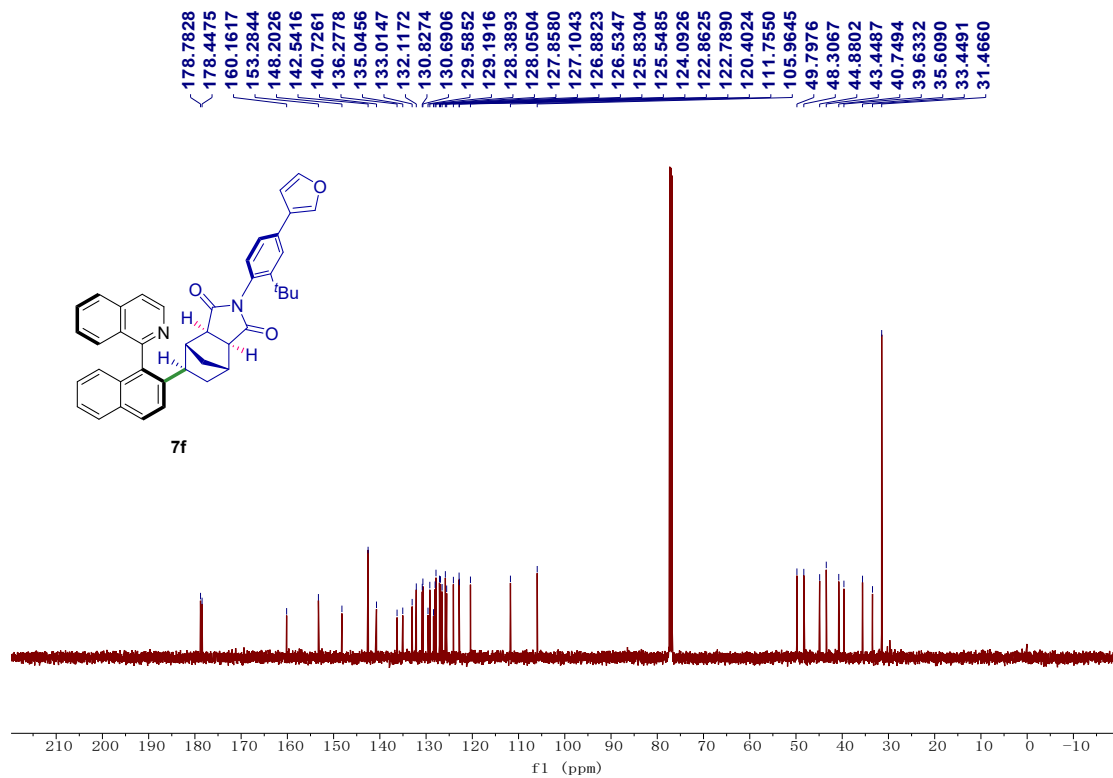

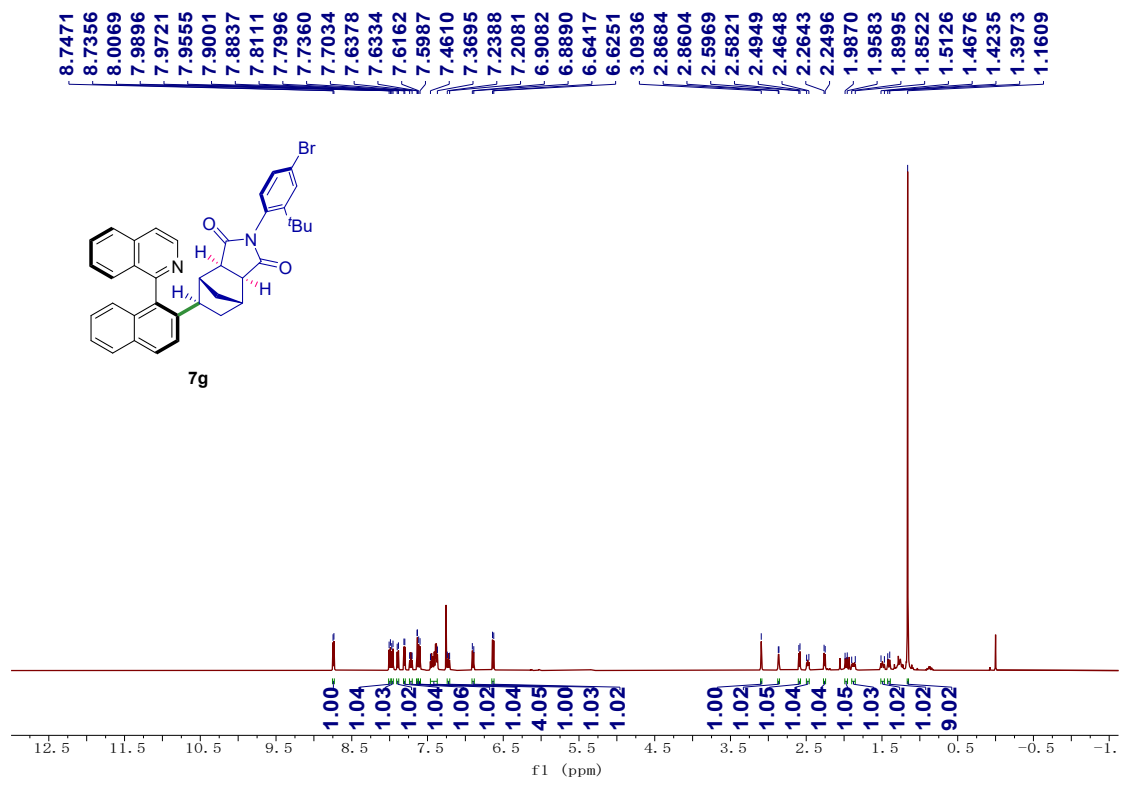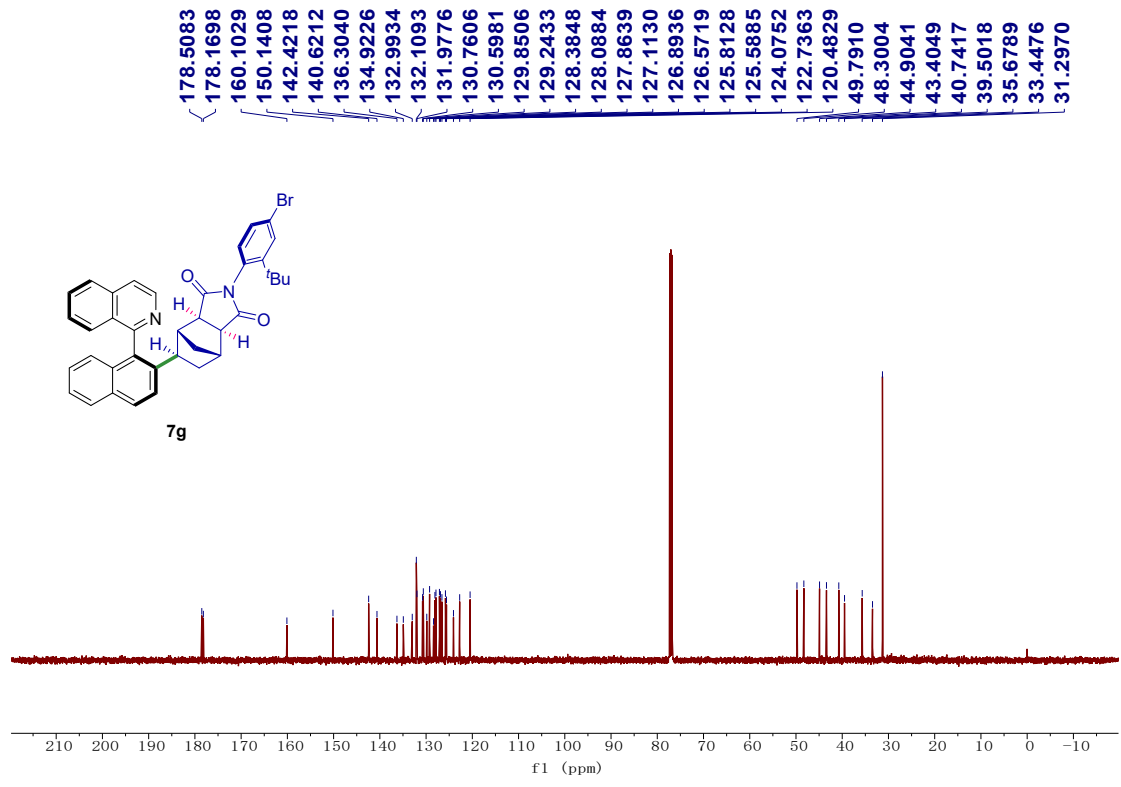

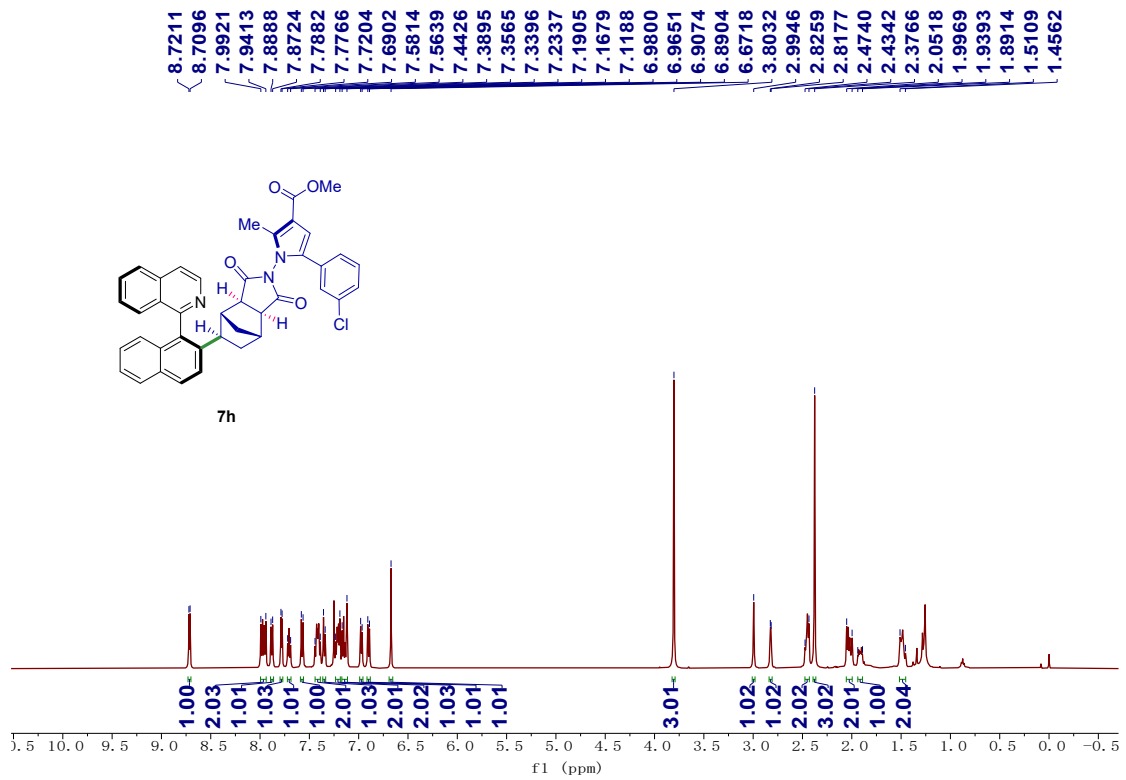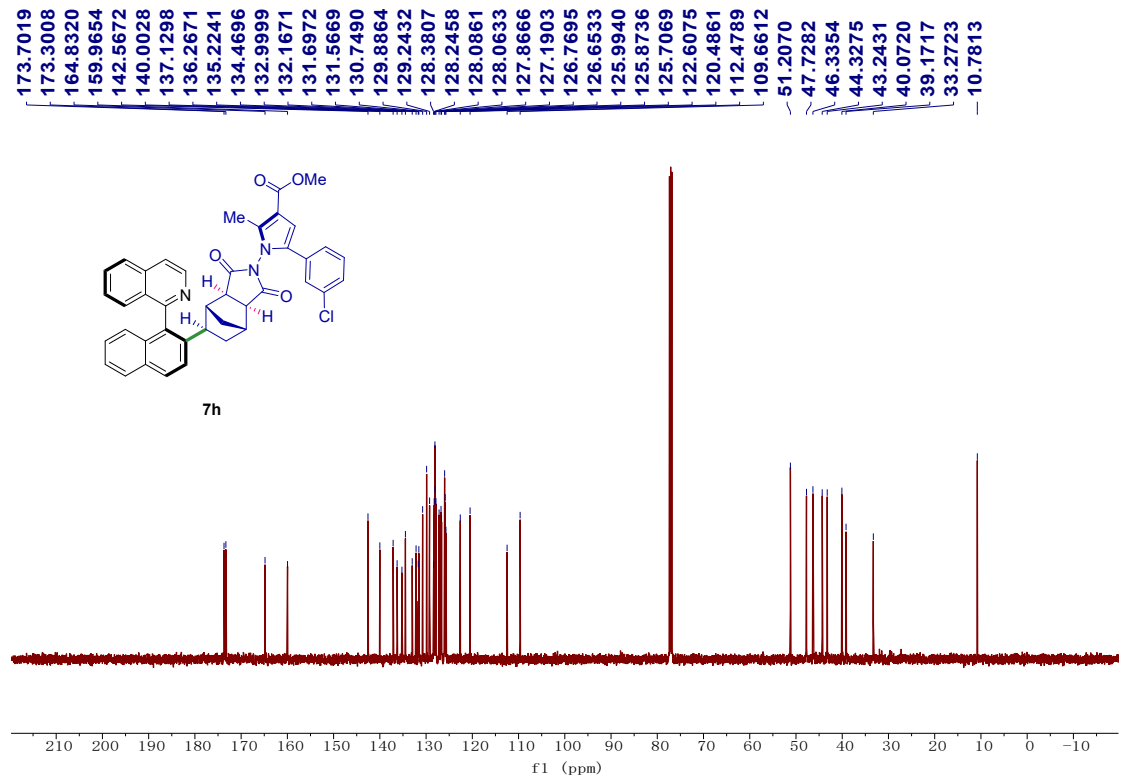

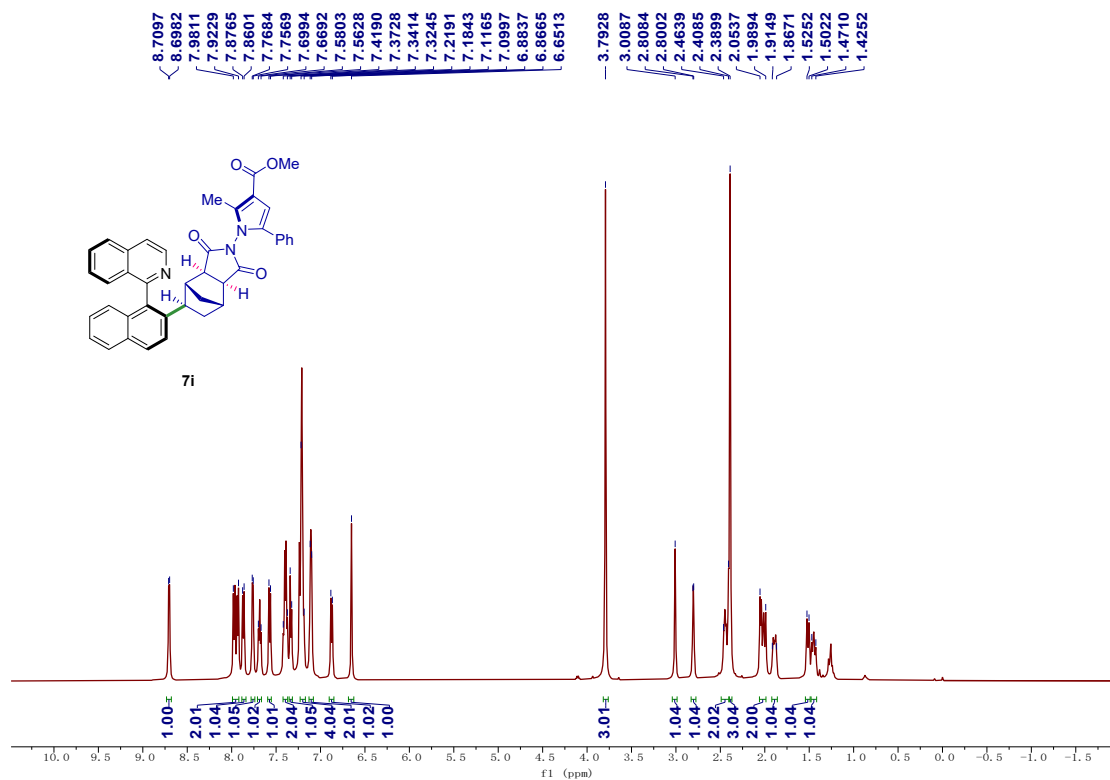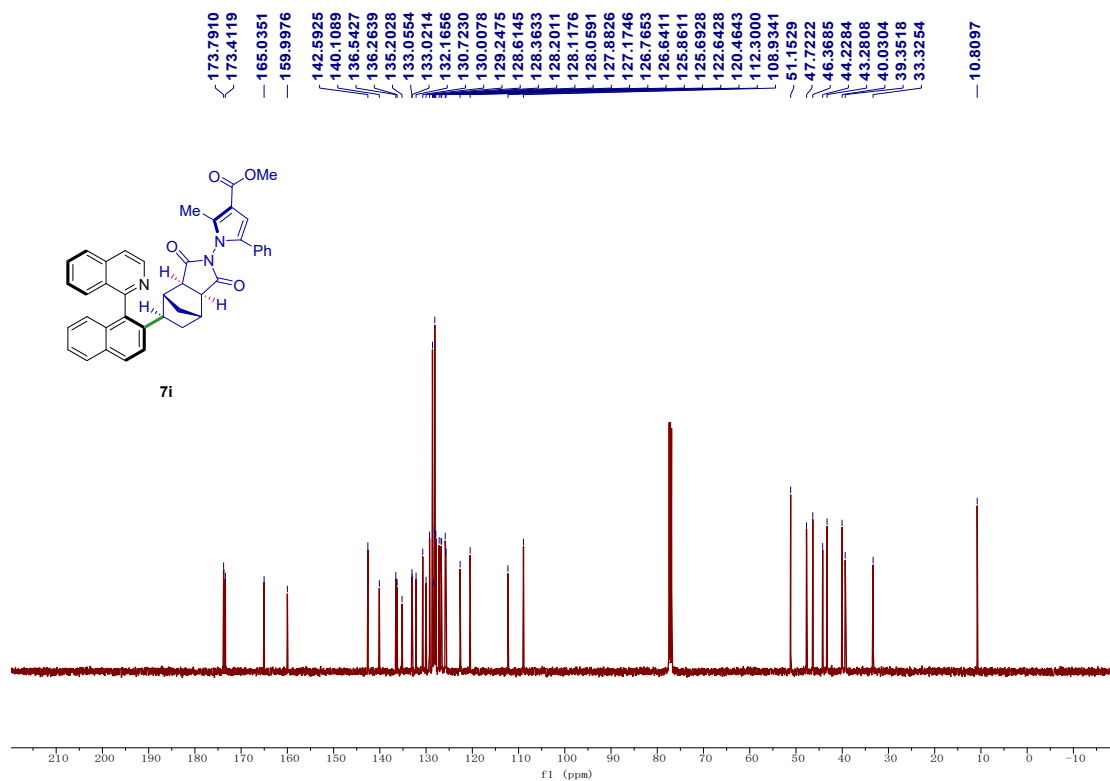



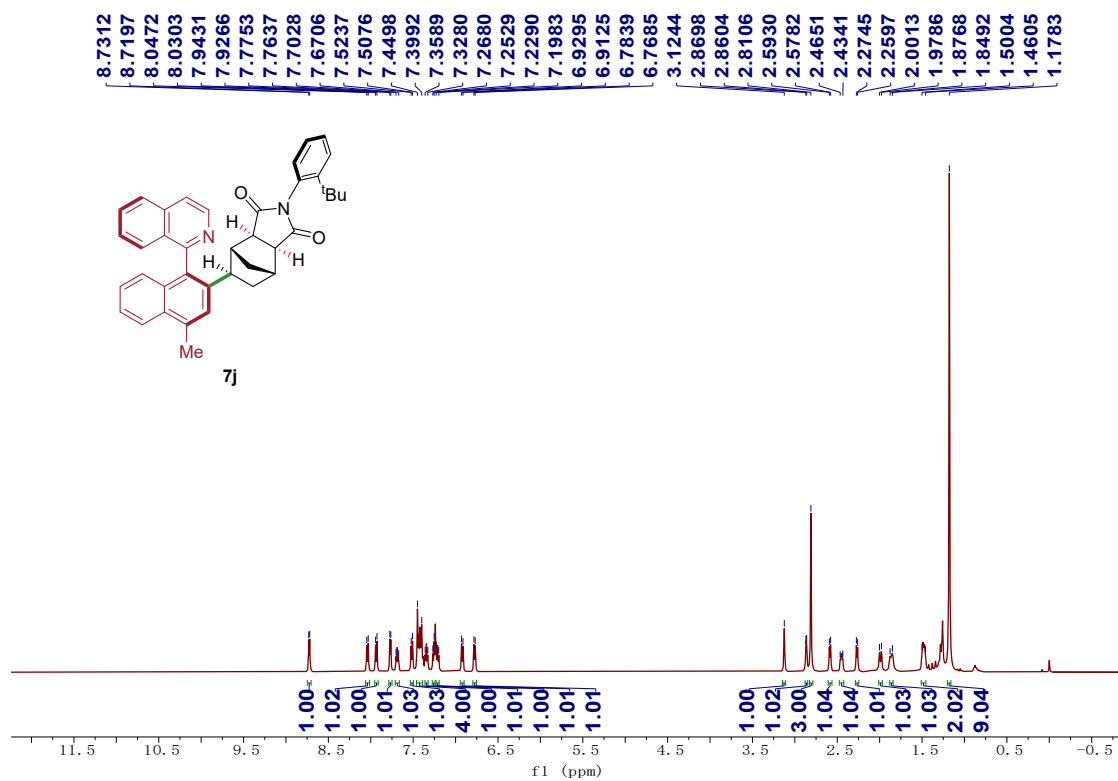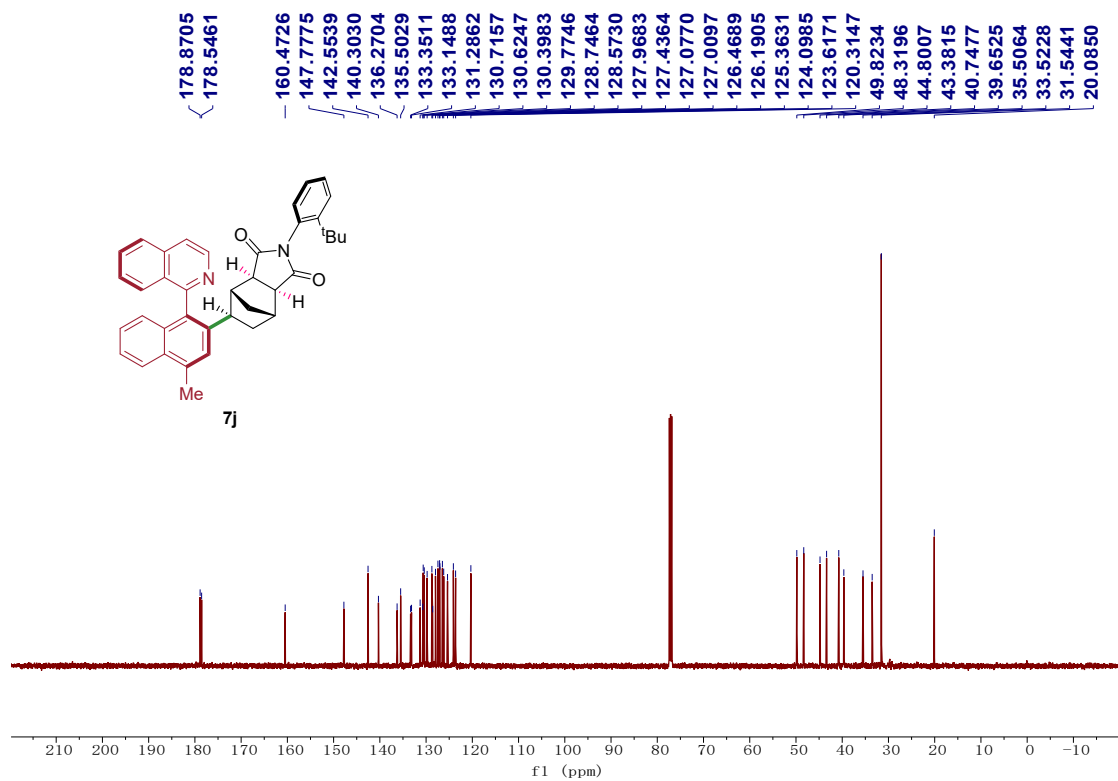

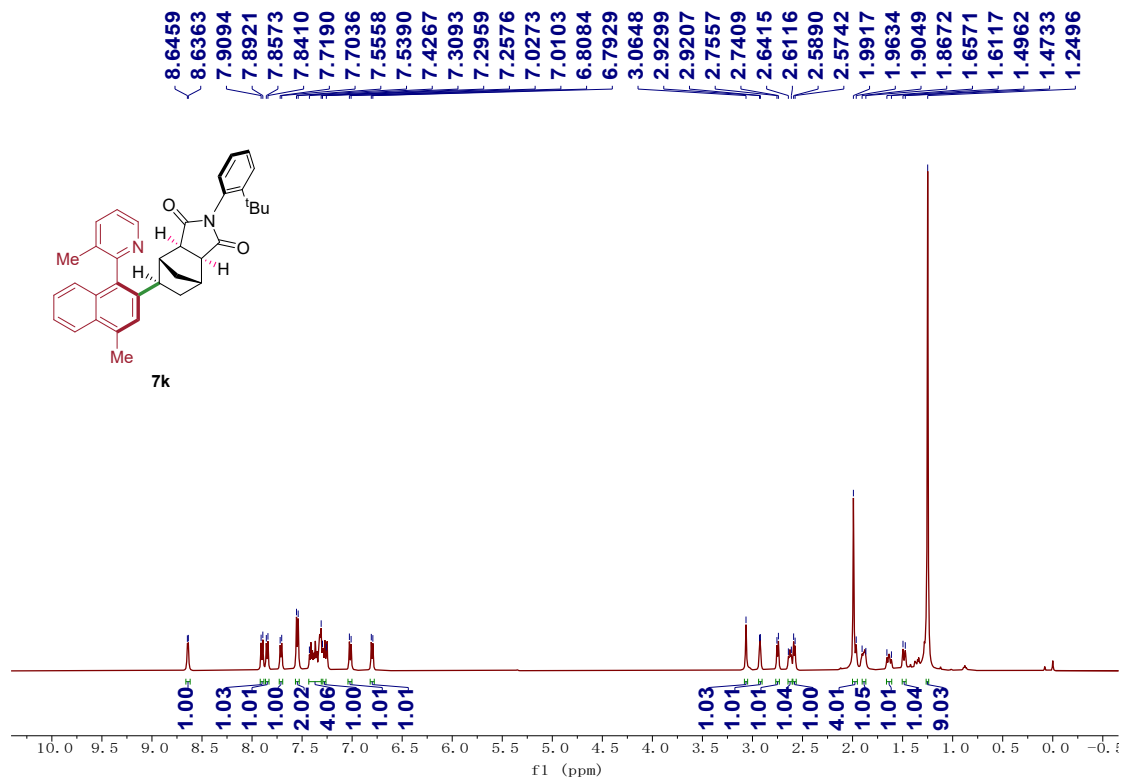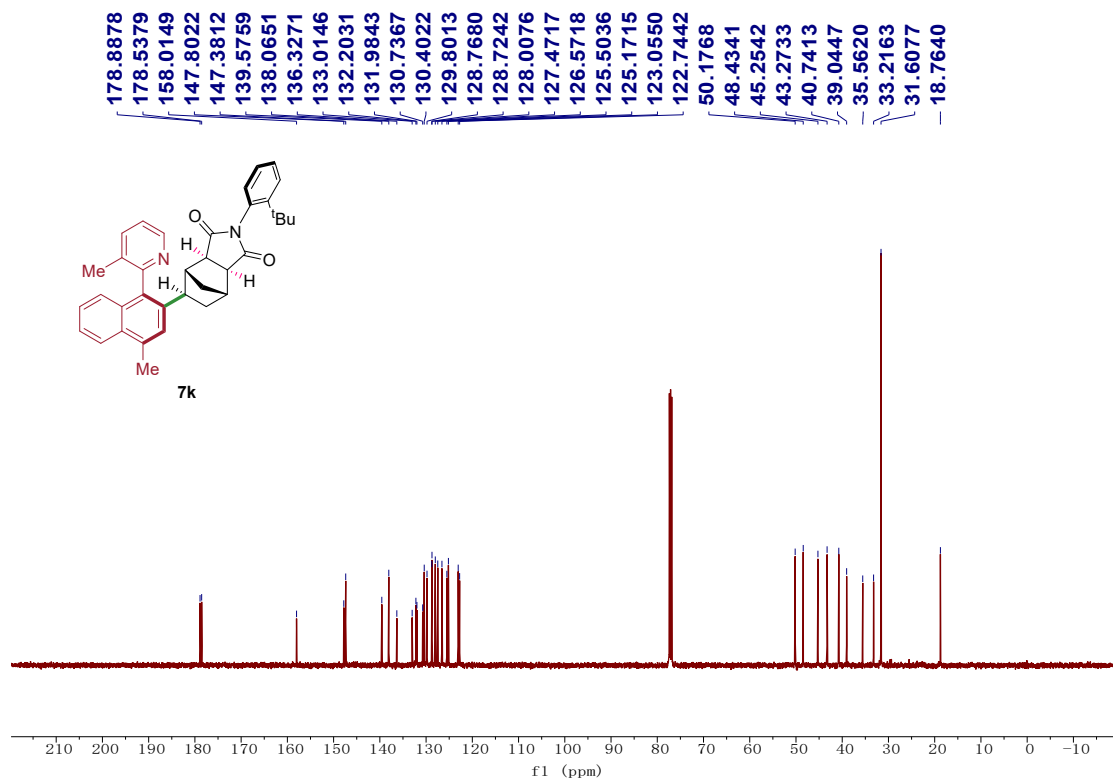

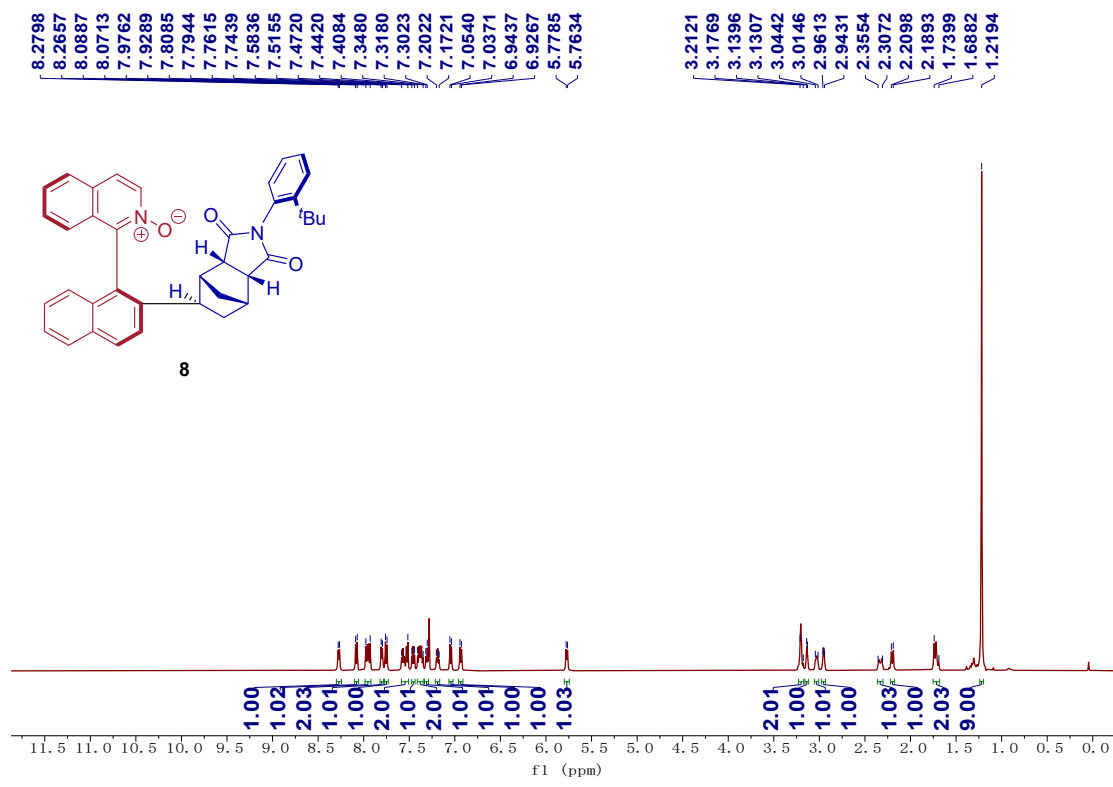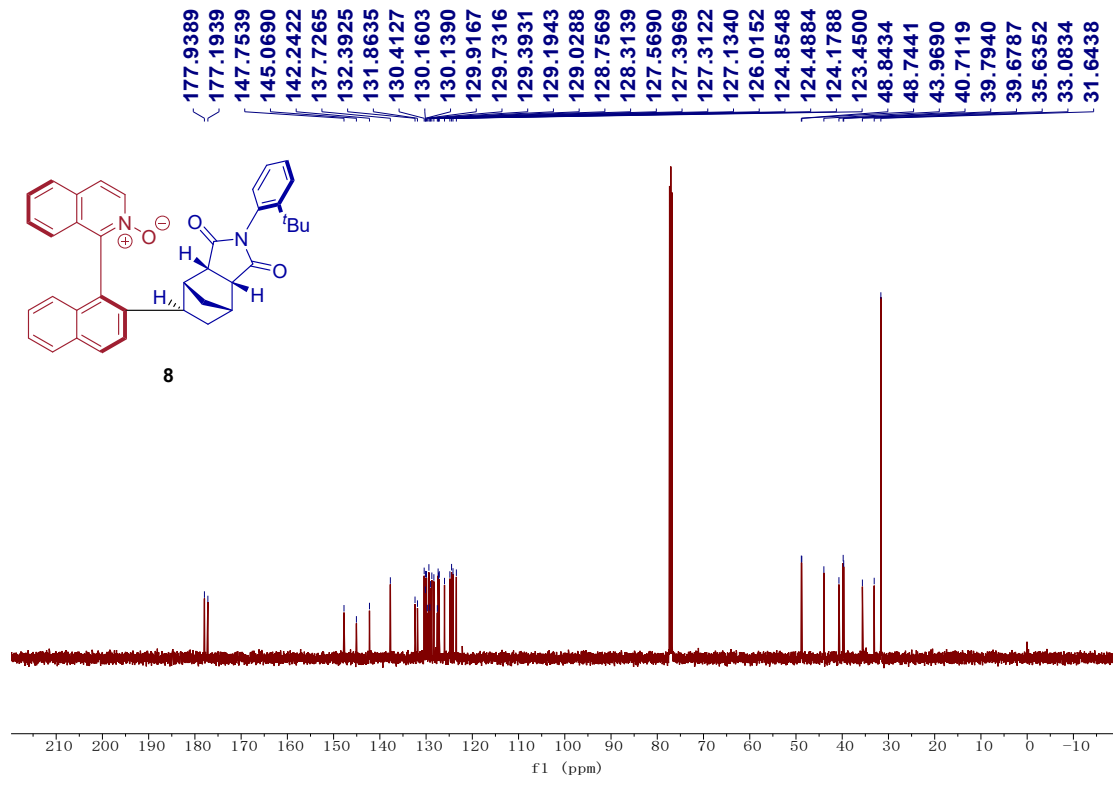

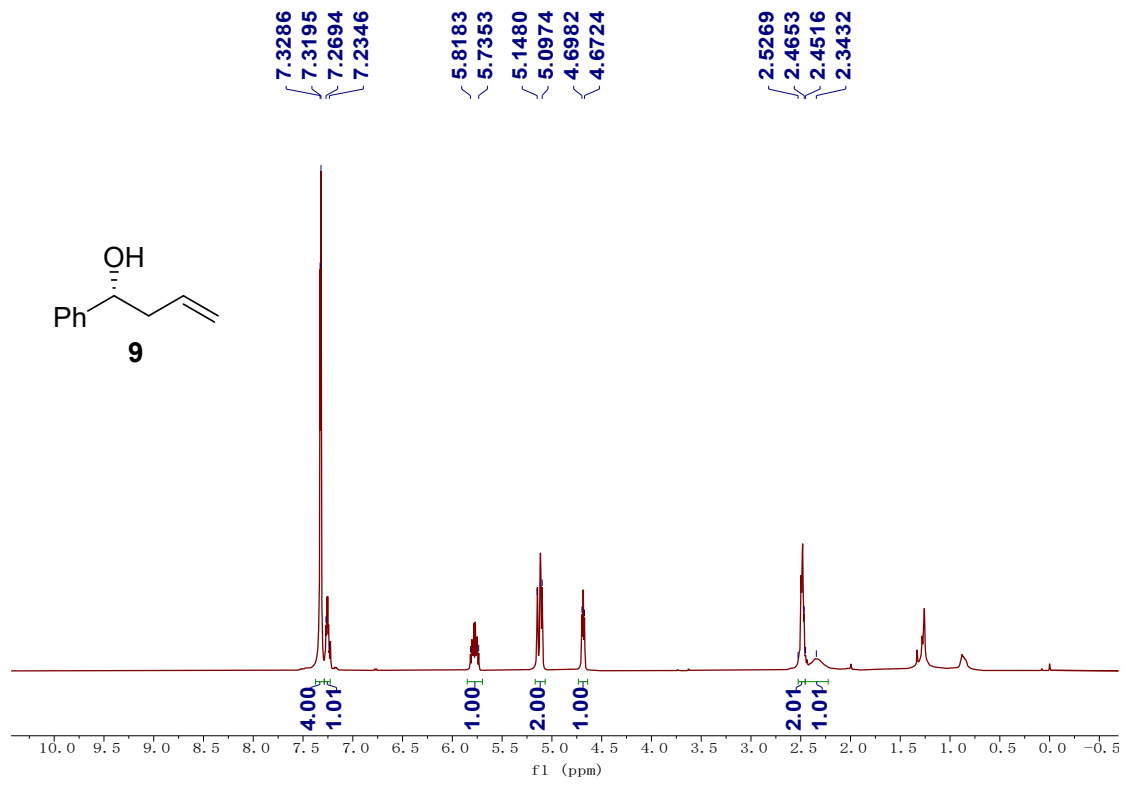

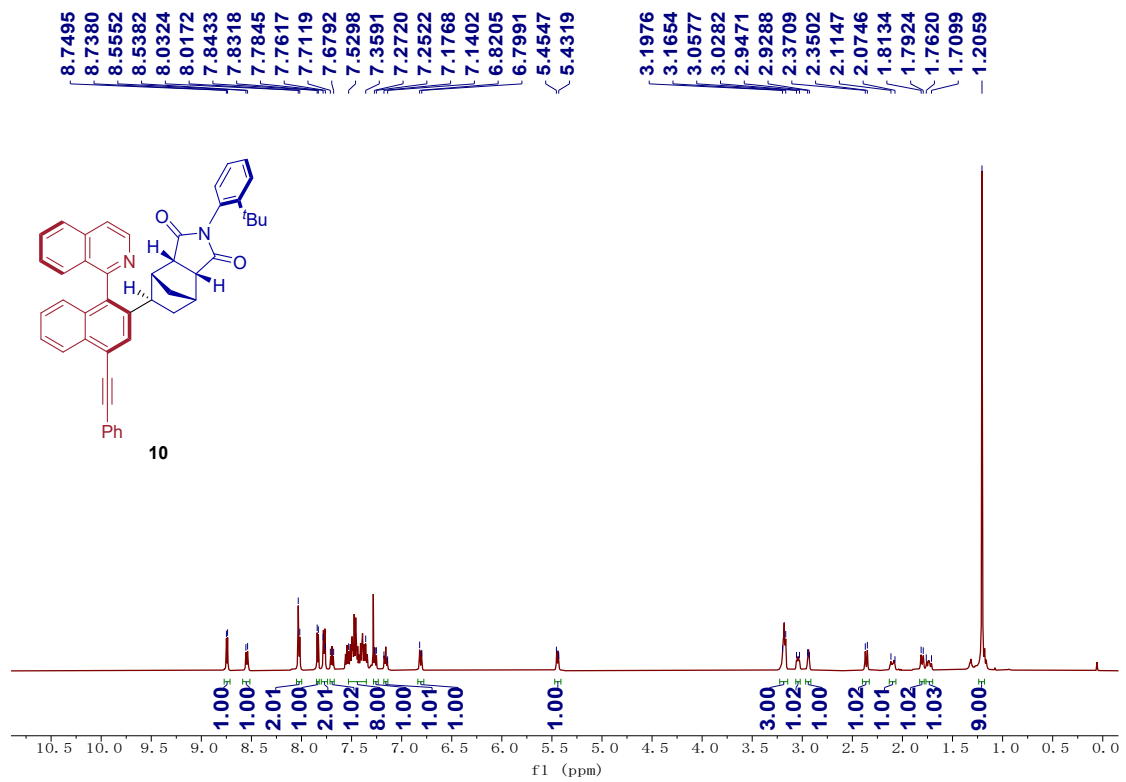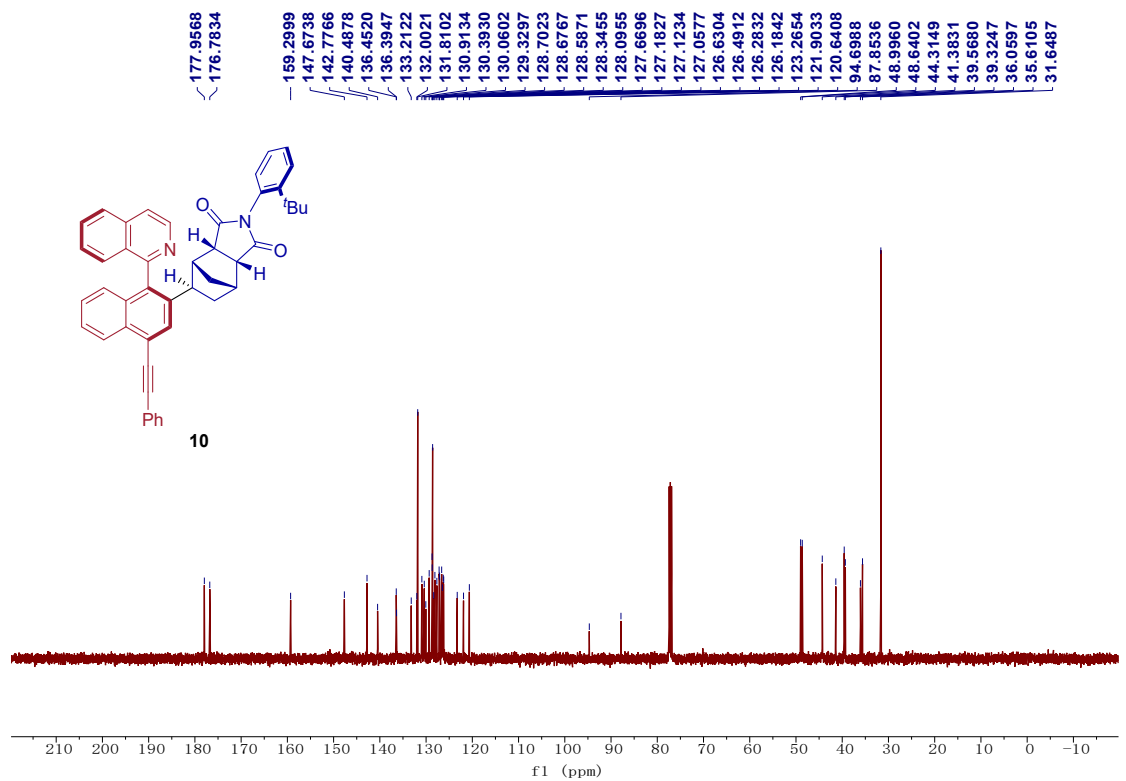

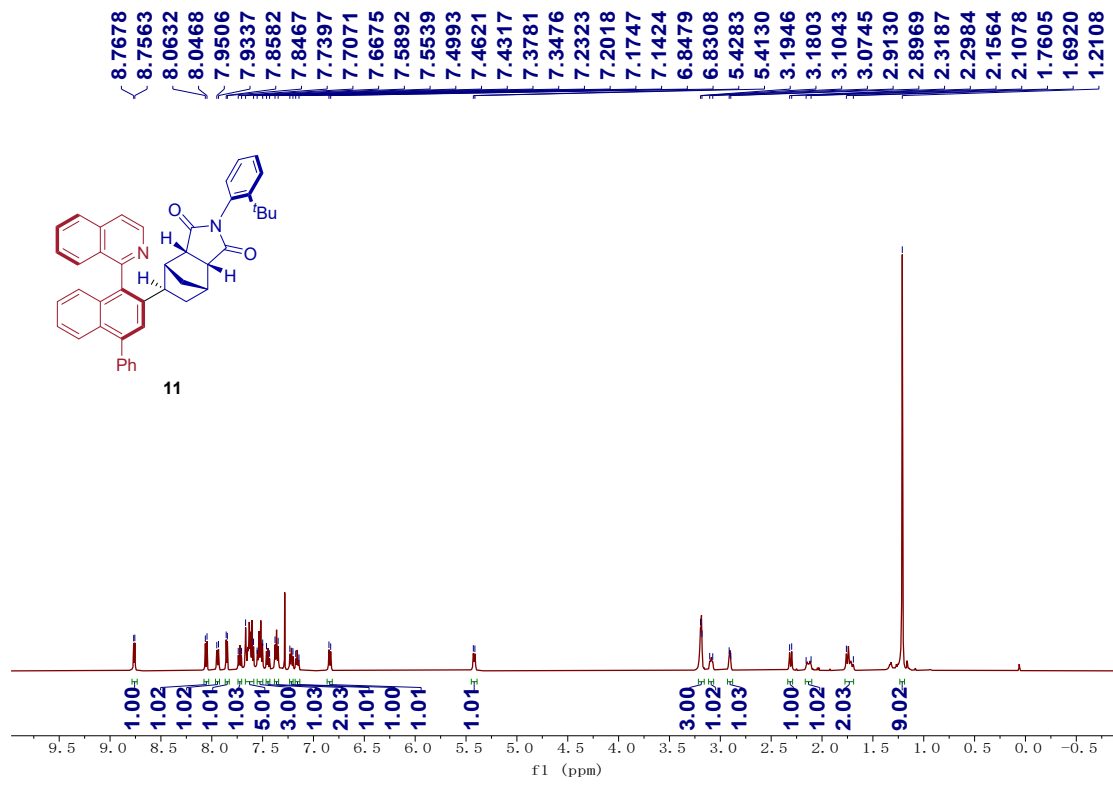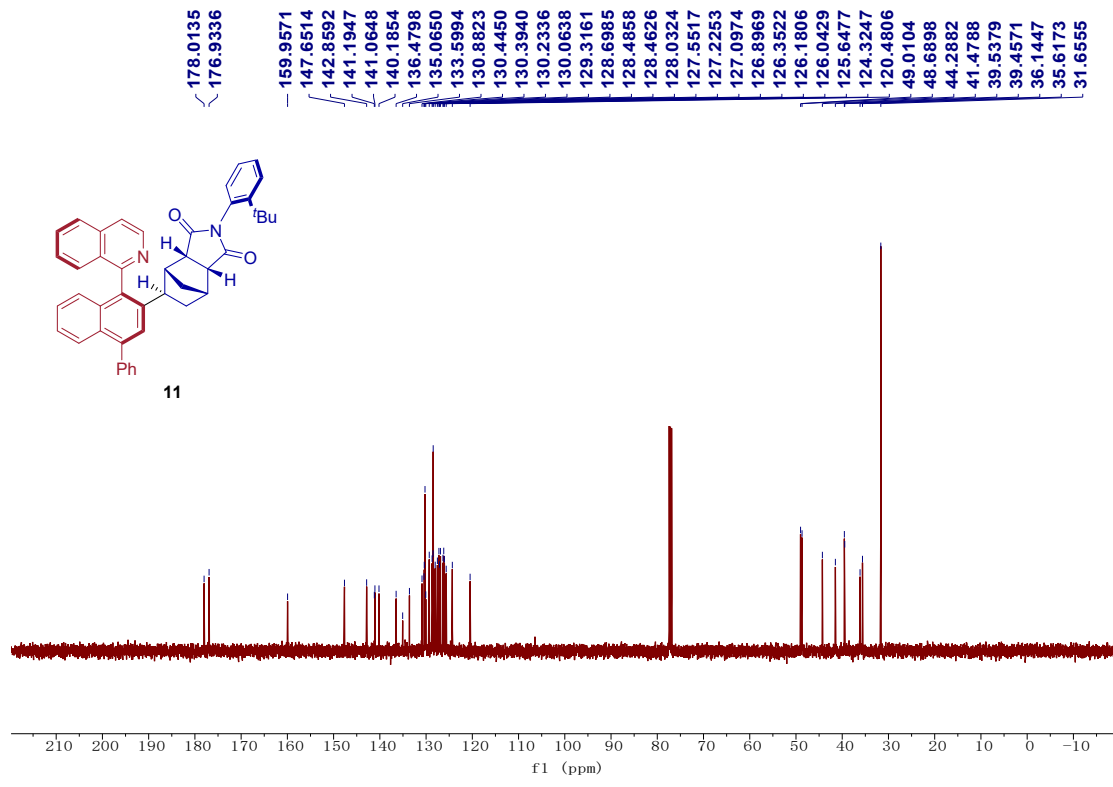

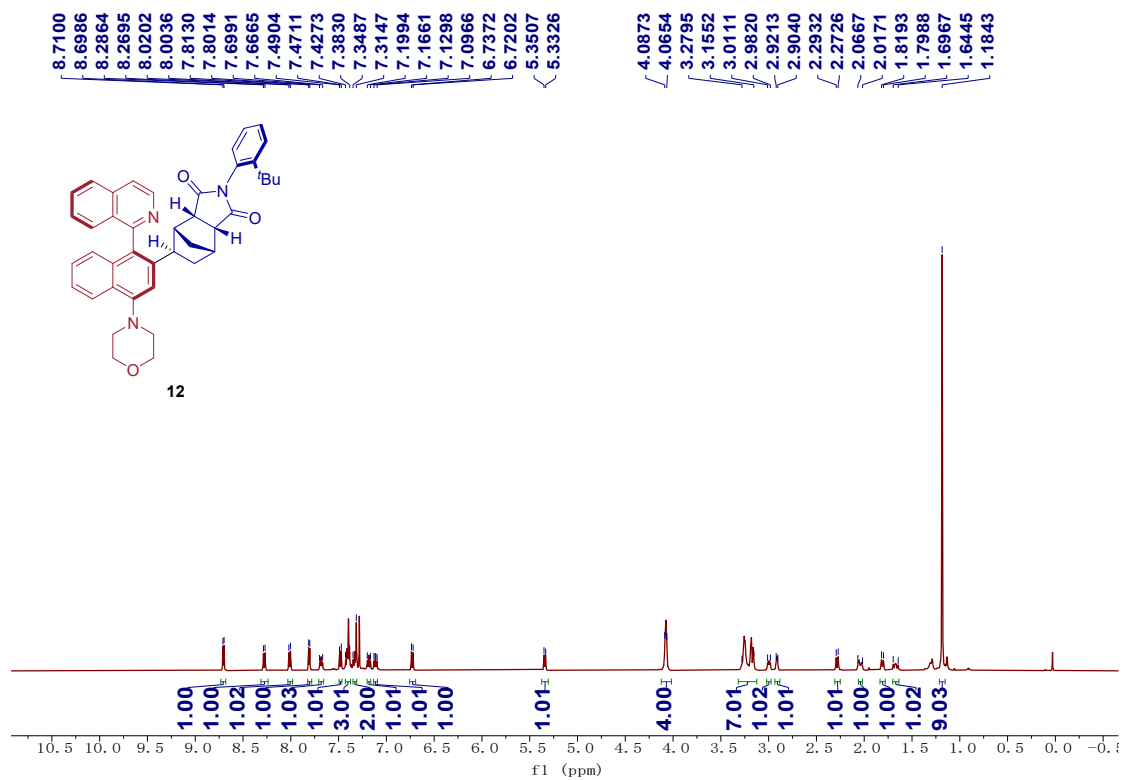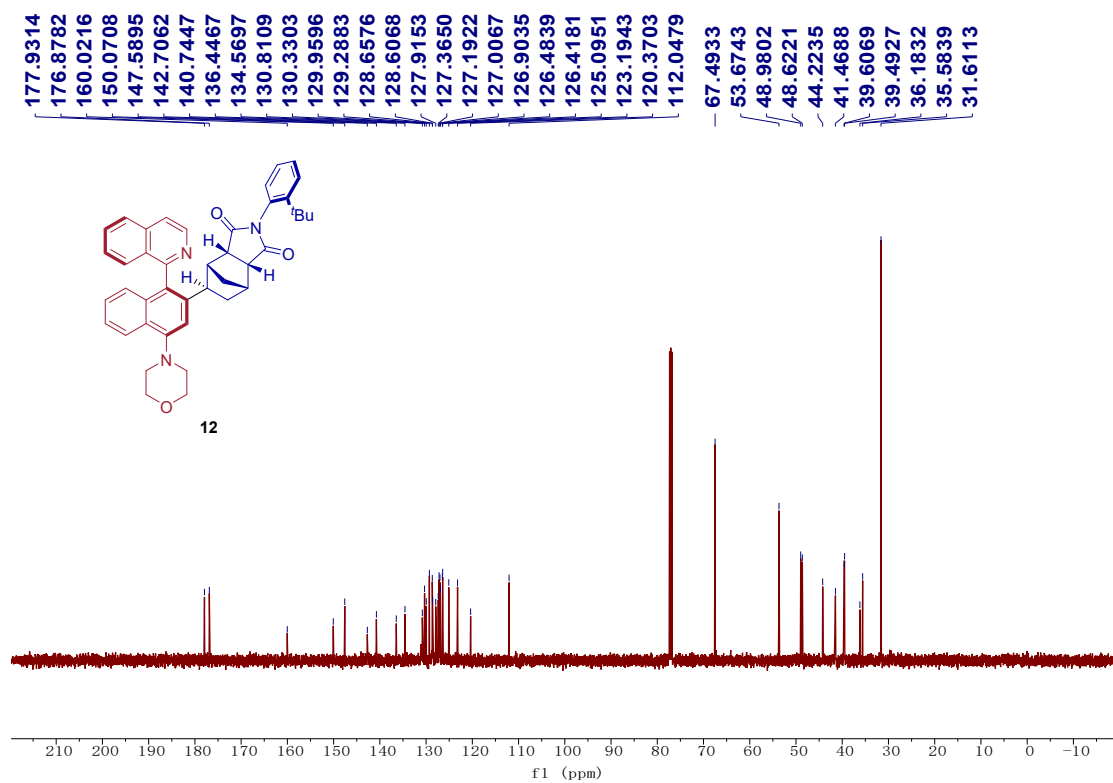

Supplement: d4sc01837k1.pdf [file d4sc01837k1.pdf]
